# Supplementary material for: Copper boosts the biostimulant activity of a vegetal-derived protein hydrolysate in basil: morpho-physiological and metabolomics insights
Source: Front Plant Sci. 2023 Aug 24;14:1235686. doi: 10.3389/fpls.2023.1235686 (PMC10484225; doi:10.3389/fpls.2023.1235686)
Supplement: Supplementary file 1 [file Table_1.xlsx]

## Sheet: Table S1
Table S1. List of metabolites revealed with the untargeted UHPLC-ESI/QTOF-MS analysis on basil leaves.
Compound	Basilico_1-r001	Basilico_1-r002	Basilico_2-r001	Basilico_2-r002	Basilico_3-r001	Basilico_3-r002	Basilico_10-r001	Basilico_10-r002	Basilico_11-r001	Basilico_11-r002	Basilico_12-r001	Basilico_12-r002	Basilico_7-r001	Basilico_7-r002	Basilico_8-r001	Basilico_8-r002	Basilico_9-r001	Basilico_9-r002	Basilico_13-r001	Basilico_13-r002	Basilico_14-r001	Basilico_14-r002	Basilico_15-r001	Basilico_15-r002	Basilico_4-r001	Basilico_4-r002	Basilico_5-r001	Basilico_5-r002	Basilico_6-r001	Basilico_6-r002	Alignment Value	Annotations	CAS Number	ChEBI ID	CompositeSpectrum	Retention Time
CPD-12328	280016	1	473137	465239	363342	366427	427563	408368	469557	467565	1	552515	533406	1	1	1	1	1	567899	571904	1	1	1	1	734672	1	1	1	531152	524145	CPD-12328	CPD-12328 [ C9 H11 N O, tgt=38.82, overall=38.82 ]			(132.07986, 21687.365)(133.08386, 628.13)(153.09, 656.15)(169.1202, 259.03)(155.06914, 415.49268)	4.29831
VOMILENINE	499999	494705	1	782112	628185	633322	1283285	1213052	1	1229053	424381	424978	202494	195405	607002	1	622621	623171	375640	359852	243673	244578	447472	438811	319215	306050	519104	508001	399360	406322	VOMILENINE	VOMILENINE [ C21 H22 N2 O3, tgt=39.27, overall=39.27 ]			(333.15045, 982.8934)(354.18628, 16383.214)(355.18866, 1687.4678)(336.17627, 2543.9646)(368.1874, 30733.752)(369.1899, 3795.5522)(354.18738, 19222.432)(355.1902, 2387.1602)(373.29178, 4384.2305)(376.1661, 5513.05)(357.14984, 2399.635)	8.2716
CPD-19726	4785805	4674840	2232831	2229971	2146202	5510221	3768525	3853153	3685231	3662235	5387147	5477896	4767058	5025845	5332224	5234069	4277129	4276114	3733701	3821534	4676626	4699265	3016249	2974261	3375865	3462431	2593155	2455971	4699305	4627089	CPD-19726	CPD-19726 [ C15 H12 O7, tgt=80.83, overall=80.83 ]			(287.05328, 97469.67)(288.056, 11545.585)(289.0582, 2775.29)(304.0501, 238.85)(327.1028, 683.3467)	6.7584
CPD-11826	649814	611339	510458	521343	559748	544367	352830	343424	433816	416099	265191	296209	1327573	1230320	999134	990394	920754	910970	1288844	1177202	908153	297589	266630	1209074	1578284	1379544	285549	272671	1294146	1275783	CPD-11826	CPD-11826 [ C29 H49 O9 S, tgt=37.61, overall=37.61 ]			(574.3156, 5550.6133)(575.3187, 363.25)(555.28436, 37685.48)(556.28687, 10635.669)(557.2939, 2372.6777)(575.3371, 602.43)(557.2941, 4718.59)(595.3441, 2413.5984)(573.3311, 1726.9453)(596.30286, 9222.885)(597.30566, 954.69006)(579.2766, 1613.28)	7.2927
CPD-19725	4785805	4674840	6535490	6502226	2146202	5510221	3769077	3853153	3685231	3662235	5382918	5472867	4767058	5025845	5332224	5234069	4277129	4276114	3733701	3821534	4676626	4699265	3016731	2975009	3376581	3462431	2593155	2455971	4699305	4622002	CPD-19725	CPD-19725 [ C15 H10 O6, tgt=80.83, overall=80.83 ]			(287.05295, 197572.98)(288.05554, 25291.988)(289.0577, 2443.8167)	6.756
L-DIHYDROXY-PHENYLALANINE	251948	713277	828352	1121433	771183	782695	803029	806885	1291056	1288968	717572	701848	1	816772	854707	859404	694839	712152	694012	686805	588140	595188	714996	710991	980315	907500	999870	993952	791496	797906	L-DIHYDROXY-PHENYLALANINE	L-DIHYDROXY-PHENYLALANINE [ C9 H11 N O4, tgt=71.29, overall=71.29 ]			(215.10472, 29266.973)(216.10796, 2281.8926)(197.09453, 1452.3025)	10.1462
CPD-11828	830995	1	718006	725491	735506	736752	963035	946077	809709	808104	672560	676336	805368	798721	581971	589999	902168	906655	879824	901280	1	919352	821849	812615	320873	306116	697773	721085	285187	260817	CPD-11828	CPD-11828 [ C29 H49 O8 S, tgt=53.58, overall=53.58 ]			(539.3019, 13440.089)(540.2995, 4388.367)(541.30176, 627.3505)	15.637
CPDQT-326	153588	144845	1	1	1	1	135866	139065	1	1	1	1	175345	178692	1	1	1	1	1	1	141471	1	1	1	218769	203332	1	1	1	1	CPDQT-326	CPDQT-326 [ C29 H50 O6, tgt=0.04, overall=0.04 ]			(500.38818, 25567.916)(505.34467, 2777.5745)	19.3436
INDOL-YLACETYL-MYO-INOSITOL-ARABINOSIDE	388438	334080	478558	475476	388074	392017	568549	544903	546434	545484	590260	589772	462236	393608	644554	637104	689094	709255	1001505	979789	919398	756336	710820	706226	1157464	1072556	760964	733481	1052757	1070378	INDOL-YLACETYL-MYO-INOSITOL-ARABINOSIDE	INDOL-YLACETYL-MYO-INOSITOL-ARABINOSIDE [ C21 H27 N O11, tgt=37.56, overall=37.56 ]			(470.15234, 24055.783)(471.16254, 6219.616)(457.15112, 16345.398)(470.1537, 21693.654)(471.163, 4816.797)(472.15588, 1321.79)(488.5372, 1813.0756)(473.19077, 3765.4495)(497.1592, 4262.038)(475.15305, 3960.6853)(476.15488, 452.825)	6.0498
CPD-19720	1085634	685645	119652	122326	292889	819007	953650	1119883	715149	702113	275000	534243	220370	189506	180983	177550	135707	143544	119663	224393	129049	122837	215762	202310	1023707	972245	1	328987	483325	546854	CPD-19720	CPD-19720 [ C34 H30 Fe N4 O5, tgt=11.20, overall=11.20 ]			(613.15955, 10038.615)(614.16254, 1657.2764)(612.1092, 20075.314)(614.0401, 2237.8555)(614.1706, 573.02)	19.2865
CPD-7420	349120	427580	189228	217792	1865834	1693682	1309821	1264412	2414778	2385193	718788	695620	1124405	1084540	2869217	2768376	631735	618223	2232158	2251319	972938	930688	685729	654102	1283239	1278978	678623	663514	3181025	580376	CPD-7420	CPD-7420 [ C40 H58 O, tgt=29.57, overall=29.57 ]			(560.4628, 1318.1958)(573.48035, 28428.043)(574.4831, 9342.501)(575.491, 1885.3684)(576.49805, 909.1699)	23.4156
L-GAMMA-GLUTAMYLCYSTEINE	752035	757852	711501	712145	860477	571798	656334	549683	1	1	1	1	1348025	559121	1667187	1676291	416500	411959	541205	1	1	1	1	442938	601221	1054971	779340	753310	1218884	395896	L-GAMMA-GLUTAMYLCYSTEINE	L-GAMMA-GLUTAMYLCYSTEINE [ C8 H13 N2 O5 S, tgt=31.32, overall=31.32 ]			(250.69385, 20093.191)(250.0616, 2324.704)(251.0537, 1034.0099)(231.04808, 18710.258)(232.05226, 1274.3232)(267.09494, 21697.35)	5.16583
CPD-6964	326309	311277	264765	1	295370	285654	313320	292617	261372	263638	269886	282899	288193	281642	221978	223578	235909	239077	268558	248996	215440	210130	261851	251018	330270	305284	303393	299521	304488	301211	CPD-6964	CPD-6964 [ C15 H14 O2, tgt=45.63, overall=45.63 ]			(227.12543, 9320.424)(231.08409, 14176.562)	5.35058
CPD-7424	14305083	7834016	14676875	14249426	18376924	17226776	6906792	6872232	21167968	20067910	25135334	12769987	1	1	1	1	1	1	12197100	53531500	4882018	4782957	19131216	18010306	8848565	1	1	22161664	1	1	CPD-7424	CPD-7424 [ C40 H56 O4, tgt=59.27, overall=59.27 ]			(600.4076, 23591.555)(583.1902, 57912.79)(584.40985, 28008.95)(585.42065, 6826.4062)(601.4175, 97159.04)(602.4207, 35019.137)(603.4239, 6750.584)(604.42645, 642.855)(583.40936, 181341.31)(584.4121, 69665.47)(585.4156, 13707.293)(623.4202, 578.786)(605.8305, 11015.318)(606.38446, 5015.5)(607.3946, 237.48)	20.4114
CPD-6963	251948	713277	828352	288662	771183	782695	803029	806885	1018145	1025362	717572	701848	650692	816772	854707	645302	694839	712152	694299	686805	588140	595188	535057	540418	965222	908469	999870	774018	618592	797906	CPD-6963	CPD-6963 [ C14 H14 O2, tgt=56.75, overall=56.75 ]			(215.10475, 30172.996)(216.10794, 2432.398)(197.09456, 1556.8044)	10.1468
ACENAPHTHENEQUINONE	106834	104183	113726	112243	108333	112110	138822	106580	101119	120744	130789	120549	128602	109828	117016	126147	118985	114831	129463	98178	83690	80220	105263	95578	130864	102609	122491	116036	121928	113202	ACENAPHTHENEQUINONE	ACENAPHTHENEQUINONE [ C12 H6 O2, tgt=40.90, overall=40.90 ]			(165.03175, 535.10394)(183.18236, 7860.2)(184.04884, 938.2933)(170.04745, 4216.9966)(185.06534, 992889.06)(186.06694, 187517.4)	1.432
CPD-12332	3249475	3125428	2047415	2030171	2563587	2543363	289883	3612945	5289489	5229135	1	4218060	1	3227787	4926875	4824957	458909	476075	508678	511693	5883123	5373044	1	503232	6857166	6635192	5297868	5295361	4434778	1	CPD-12332	CPD-12332 [ C20 H26 O5, tgt=39.01, overall=39.01 ]			(346.60992, 2000.2706)(328.15952, 108081.22)(329.161, 16108.178)(330.1635, 345.3475)(331.30066, 4838.3647)(332.18713, 1690.9584)(365.22476, 3088.7883)(347.2137, 3004.82)(372.17642, 863.4289)(351.14655, 5673.3047)	15.3629
CPD-13475	9418384	9641537	10586392	10349023	9851416	9990194	9876181	9737779	10755192	10647791	672361	11351576	10702454	10895937	10495578	10241005	11195558	11425034	10564437	10450243	11992939	671106	8634457	7996269	10795789	10669489	8654749	8545914	10979255	10765805	CPD-13475	CPD-13475 [ C15 H24, tgt=67.89, overall=67.89 ]			(205.19395, 248927.34)(206.19664, 32715.732)(207.19968, 725.297)	16.5222
CPD-12333	3249475	3125428	2047415	2030171	2563587	2543363	289883	1	1	1	1	1	1	3227787	4926875	4824957	1	1	508678	511693	1	1	1	503232	6857166	6635192	5297868	5295361	4434778	1	CPD-12333	CPD-12333 [ C20 H26 O5, tgt=39.01, overall=39.01 ]			(346.6256, 1871.1244)(328.1596, 102079.86)(329.1611, 15659.123)(330.16415, 473.56)(331.18347, 4282.9136)(332.18695, 1351.46)(365.22458, 3509.0725)(372.1767, 1066.0085)(351.1465, 3832.54)	14.8198
CPD-11839	173169	164996	246233	1	205010	201770	257473	1	232957	227868	1	184386	266771	262668	231209	1	191311	214628	375879	658863	333659	340778	361229	370379	215280	210277	1126733	1119110	152249	165593	CPD-11839	CPD-11839 [ C28 H47 O6 S, tgt=46.41, overall=46.41 ]			(515.1534, 8140.8813)(516.08026, 1184.0906)(495.28912, 9270.32)(496.2927, 554.12)(497.30414, 10700.631)(498.30695, 887.4042)(511.33215, 6890.004)(512.33435, 749.99)	14.7074
CPD-6971	435962	434090	1	277576	575537	356341	1	553729	622813	697425	538571	550726	599445	533299	606513	612699	546076	385404	754407	727887	744144	696537	648477	629299	477037	488662	377152	369208	261469	272252	CPD-6971	CPD-6971 [ C20 H25 O4, tgt=39.01, overall=39.01 ]			(331.4498, 2281.3494)(313.01434, 11115.564)(312.16412, 1974.9113)(331.1836, 1469.435)(315.1875, 40452.4)(316.1922, 6961.628)(348.62555, 6175.0547)(351.21524, 249.25)(352.15665, 24498.36)(353.15884, 2717.6099)	13.4925
CPDQT-341	1	327328	564786	569900	435143	437318	543353	544792	627600	624184	671740	686753	685785	698883	703019	709096	599731	596062	700681	694721	659552	636694	678330	667919	865079	868297	443590	441808	656981	647261	CPDQT-341	CPDQT-341 [ C6H13NOS, tgt= ]			(130.06401, 6263.9746)(133.06378, 511.498)(149.09476, 493.54303)(170.05849, 20561.389)(171.06175, 991.5346)	4.2966
CPD-6975	135563	119789	1	1	152548	142213	1	1	536713	1	1	1	1	1	1	1	544510	1	661888	647256	670200	574647	1	1	735368	681415	625090	641258	1	1	CPD-6975	CPD-6975 [ C19 H21 O5, tgt=47.46, overall=47.46 ]			(329.13705, 5661.133)(313.1405, 330.6)(331.14993, 4492.0977)(329.161, 24442.406)(330.16345, 303.72)	13.9588
CPD-6974	18592864	17459154	16498742	16255171	17050976	14285275	20743260	25617404	30355040	29836292	27033936	23295080	24131240	17992392	28201672	28114040	31203452	31390448	30831166	26967724	28689144	1	1	24469610	40776616	39239408	27333780	30569364	25707420	25396476	CPD-6974	CPD-6974 [ C20 H25 O5, tgt=78.09, overall=78.09 ]			(327.15692, 706998.4)(328.15988, 137247.27)(329.1612, 19514.271)(330.16345, 1417.1599)(345.18524, 18785.86)(346.1875, 1487.4983)(372.1764, 585.96893)(350.1407, 32353.016)(351.1442, 3125.5134)	16.618
CPD-7418	15678526	14779182	24409680	24563804	21217928	20547214	14847482	13638327	18367648	18484676	21029736	20476540	16547328	15290293	20741060	20668082	14088265	14069624	18460128	16984952	17704540	17417644	15535784	15377769	14237571	12819460	8956367	8781991	18774692	18014370	CPD-7418	CPD-7418 [ C9 H7 O3, tgt=93.85, overall=93.85 ]			(163.0383, 528321.0)(164.04105, 42571.117)(165.04315, 2618.2478)(145.02713, 3510.9187)(147.04204, 2638.684)	8.4534
CPD-6979	503104	474521	1111940	1115165	799907	789369	453914	1	692888	698425	1007405	904953	575011	531298	830711	830114	468444	465498	685171	625006	1	1	1	559653	484398	440784	1	1	709362	684026	CPD-6979	CPD-6979 [ C18 H15 O7, tgt=46.99, overall=46.99 ]			(343.07776, 16300.411)(343.0978, 6509.5317)	8.4462
CPD-6978	503104	474521	1111940	1115165	799907	789369	453914	3239639	692888	698425	1007405	904953	575011	531298	830711	830114	468444	465498	685171	625006	1	1	1	559653	484398	440784	2960702	2841349	709362	684026	CPD-6978	CPD-6978 [ C18 H15 O7, tgt=46.99, overall=46.99 ]			(343.07776, 16300.411)(343.09805, 22452.717)(344.1024, 19506.588)(345.10938, 2776.4333)	8.2437
CPD-11840	113438	102741	1	1	1	1	108225	105110	1	1	1	1	107779	104517	1	1	1	1	1	1	95223	94121	1	1	100635	87774	1	1	1	1	CPD-11840	CPD-11840 [ C28 H50 O2, tgt=43.73, overall=43.73 ]			(447.3978, 3032.0588)(403.37308, 2983.78)(420.39886, 6702.382)(425.3687, 5782.0786)(420.39923, 6822.225)	21.5478
4-AMINO-4-DEOXYCHORISMATE	1	1	1	1	1	1	1	1	1	1	1	1	1	1	1	1	1	1	1	1	1	1	1	1	221113	151953	129128	1	1	1	4-AMINO-4-DEOXYCHORISMATE	4-AMINO-4-DEOXYCHORISMATE [ C10 H10 N O5, tgt= ]			(207.0424, 12947.233)(225.08856, 1384.9767)	16.158
CPD-11846	752035	1	980730	983734	860067	875995	1426987	1414951	1100510	1157209	1194849	1268656	1427944	1378617	1606356	1677069	2131534	2122427	1863436	1781172	1824352	1770593	1667061	1650648	1269883	1054971	941795	933668	1221624	1298914	CPD-11846	CPD-11846 [ C12 H11 N O5, tgt=28.95, overall=28.95 ]			(249.05838, 43848.49)(250.06123, 3991.032)(251.05331, 938.204)(231.04785, 25528.9)(232.05153, 1234.3286)(273.06232, 5881.327)	9.01986
CPD-11847	599201	572717	808125	816334	678338	684991	446189	456597	437955	447764	702317	677645	576098	621343	657820	646820	521213	512647	453862	477944	580097	602376	376828	375230	408072	420124	301313	286967	571338	556229	CPD-11847	CPD-11847 [ C12 H11 N O6, tgt=35.57, overall=35.57 ]			(249.0573, 3776.7644)(269.078, 3905.9639)(288.12234, 24956.705)(289.05768, 2492.0708)	6.7554
CPD-11845	184781	639336	711728	704485	643166	655104	2011339	2009627	237363	739430	635866	1968875	916894	184559	743784	734907	660760	641182	2393342	708291	669992	663818	708748	2133608	880195	704124	760071	743052	756921	728105	CPD-11845	CPD-11845 [ C13 H13 N O7, tgt=45.20, overall=45.20 ]			(295.06024, 681.9031)(296.0633, 286.97)(277.0648, 5258.684)(283.07846, 333.156)(295.09692, 469.455)(322.3802, 1929.7471)(300.75092, 37644.195)	2.4479
CPD-10797	15678526	14779182	24409680	24563804	21217928	20547214	14847482	13638327	18367648	18484676	21029736	20476540	16547328	15290293	20741060	20668082	14088265	14069624	18460128	16984952	17704540	17417644	15535784	15377769	14237571	12819460	8956367	8781991	18774692	18014370	CPD-10797	CPD-10797 [ C9 H7 O3, tgt=93.85, overall=93.85 ]			(163.0383, 528321.0)(164.04105, 42571.117)(165.04315, 2618.2478)(145.02713, 3510.9187)(147.04204, 2638.684)	8.4534
BETA-D-XYLOSE	220364	222475	272973	266275	269975	226574	229156	206689	254144	246170	1	1	229618	181117	1	178060	1	1	250491	1	1	1	1	1	342717	257657	219478	195329	1	1	BETA-D-XYLOSE	BETA-D-XYLOSE [ C5 H10 O5, tgt=43.80, overall=43.80 ]			(150.0539, 7047.5386)(151.0603, 144.185)(137.05736, 4852.0947)(137.05939, 5802.113)(168.0904, 738.69995)	2.3134
CPDQT-300	1	757909	529327	536170	669477	673363	650394	646571	544260	552769	566941	561739	93308	94626	280010	445382	289707	303234	128261	597253	129512	274444	215280	193892	708527	702030	756197	767857	466337	464402	CPDQT-300	CPDQT-300 [ C16H30NO9S3, tgt= ]			(479.31015, 49871.465)(480.16373, 9380.245)(481.10236, 1430.7993)(461.08783, 49100.27)(462.0902, 7550.163)(463.09174, 899.6233)(479.95883, 28493.646)(480.10217, 6978.5596)(481.10327, 922.45996)(461.0891, 45793.24)(462.0914, 6757.69)(463.0936, 481.19)(495.26132, 812.41113)(497.14603, 2996.4001)(481.13873, 110485.945)(483.1403, 4863.403)	9.3232
CPD-12350	13791362	12962548	7552352	7549898	10222868	10180006	15064737	1	12290603	12098081	10068761	1	7488702	7325272	9364369	8757047	9892536	9727000	11637141	10937123	9987564	10006013	9922228	10262894	15517319	14043098	16095544	15543988	13735560	13591249	CPD-12350	CPD-12350 [ C20 H26 O6, tgt=49.16, overall=49.16 ]			(344.16776, 461287.66)(345.17023, 71010.93)(346.17123, 9842.447)(368.187, 868.2874)(362.18954, 433.19626)	7.8974
DIMETHYL-D-RIBITYL-LUMAZINE	2496301	2346846	3237167	3211622	2734082	2749068	1	1	1	1	1	1	307573	293118	770348	766804	1030171	1	1	1	1	1	1	1	387698	1	2505172	2433181	1905846	1	DIMETHYL-D-RIBITYL-LUMAZINE	DIMETHYL-D-RIBITYL-LUMAZINE [ C13 H17 N4 O6, tgt=67.48, overall=67.48 ]			(312.12708, 5139.1387)(325.13687, 19863.701)(326.13965, 2281.7485)(350.8525, 14503.22)(352.1046, 1672.7925)(330.0923, 66317.69)(331.08826, 10291.285)	5.33667
CPD-11852	78745528	78360064	79109344	77599552	76292584	9390573	9086446	8878425	7254569	9255526	11128882	11080950	9461275	9267919	9954300	9773054	9191356	82578584	7872361	8067844	7711508	6484303	7348427	7637933	8061576	7934893	7923629	7404209	9908125	10364995	CPD-11852	CPD-11852 [ C19 H18 N O4, tgt=84.17, overall=84.17 ]			(325.13907, 477.51788)(343.1504, 237.505)(327.15662, 386135.84)(328.15952, 74717.9)(329.0992, 499775.62)(330.90372, 73242.6)(331.10498, 45636.37)(332.10693, 2971.0247)	16.3834
CPD-12355	3051903	2949152	645216	645904	591559	572449	530330	504774	6644172	6581169	4900899	569579	513770	6694588	7015597	6954551	394955	7930790	5117605	4743396	4755864	4781509	4670503	4490999	478692	452368	489964	481317	629283	613684	CPD-12355	CPD-12355 [ C19 H25 O7, tgt=51.64, overall=51.64 ]			(365.15445, 2285.1597)(347.14478, 17289.943)(348.14825, 3979.7722)(366.172, 149824.84)(367.17453, 23045.59)(368.17606, 3010.2292)(352.1715, 5611.71)(353.17395, 892.18)(387.19617, 1025.6622)(388.39096, 22309.64)(389.15805, 3949.8462)(372.08017, 9452.792)(374.14288, 6347.1533)(375.1432, 921.87)	6.5415
CPD-12353	3249475	3125428	2047415	2030171	2563587	2543363	289883	1	1	1	1	1	1	3227787	4926875	4824957	1	1	508678	511693	1	1	1	503232	6857166	6635192	5297868	5295361	4434778	1	CPD-12353	CPD-12353 [ C20 H26 O5, tgt=39.01, overall=39.01 ]			(346.6256, 1871.1244)(328.1596, 102079.86)(329.1611, 15659.123)(330.16415, 473.56)(331.18347, 4282.9136)(332.18695, 1351.46)(365.22458, 3509.0725)(372.1767, 1066.0085)(351.1465, 3832.54)	14.8198
CPD-12354	189044	174130	1	1	1	174749	468131	438150	442623	440218	335537	325524	564233	521759	409461	415554	623813	627259	548665	542378	572168	566750	498631	496408	533662	494951	312876	307367	311930	301752	CPD-12354	CPD-12354 [ C19 H23 O5, tgt=47.10, overall=47.10 ]			(315.15524, 3502.3877)(331.18405, 18691.428)(332.18698, 2449.1875)(355.1473, 8235.107)(356.15027, 861.50604)	12.7296
CPD-12351	690808	665474	780508	788918	720629	694955	645502	620551	236905	745223	176928	176941	674459	897998	775359	789711	893974	338531	1035213	996019	799212	303273	998419	954358	577471	296437	590249	576166	769857	756538	CPD-12351	CPD-12351 [ C19 H23 O6, tgt=47.62, overall=47.62 ]			(347.31293, 17273.775)(348.1479, 3098.3691)(329.42642, 6607.775)(331.1491, 944.005)(331.14972, 4978.6187)(367.64987, 1000.9908)(371.47986, 18163.213)(373.3747, 4705.201)(373.36633, 1173.4645)(374.14413, 3344.948)(353.94797, 682.22815)	5.6656
CPD-13455	1546673	1530448	769890	766505	1178481	1193555	1935838	1781025	1472674	1495533	1233573	1186214	840466	787586	1139362	1122019	1468983	1484878	1642101	1525404	1431708	1423252	1589956	1581820	2177961	2086620	2614864	2646273	2026335	2027649	CPD-13455	CPD-13455 [ C21 H16 O6, tgt=65.85, overall=65.85 ]			(365.0959, 76175.45)(366.0986, 10405.122)(367.0955, 4620.1562)(349.21982, 1378.3752)(351.09903, 5192.7866)	7.8864
SYRINGETIN	32298192	31757794	1	1	30421832	30298786	1	1	1	1	1	1	28915246	1	28995004	28751780	28675600	28306338	1	1	1	1	1	1	8644026	26752768	1	1	29370960	28738056	SYRINGETIN	SYRINGETIN [ C17 H13 O8, tgt=51.94, overall=51.94 ]			(345.4031, 783447.06)(346.4058, 136929.11)(347.26648, 19071.24)(348.10117, 1085.6755)	13.963
CPD-14590	517579	477420	693663	500703	476149	657048	906790	150969	187026	755221	795925	800963	937754	144127	723797	130279	903611	867702	1254128	1013145	893556	891823	937726	951868	1207973	964734	827605	797552	958476	905173	CPD-14590	CPD-14590 [ C8 H7 N O2, tgt=46.09, overall=46.09 ]			(150.05373, 4638.399)(152.05592, 5416.4644)(137.05829, 4531.5547)	2.6988
GALACTOSE	1881516	1775169	1015623	1038205	1445338	1446910	2090213	1942997	1764508	1732692	1499740	1469236	1025401	961814	1310607	1268838	1385363	1374892	1673864	1563560	1470763	1476630	1517889	1524058	2227394	2009619	2323737	2291864	2013114	1978317	GALACTOSE	GALACTOSE [ C6 H12 O6, tgt=75.37, overall=75.37 ]			(163.0586, 1073.2479)(180.08531, 77440.336)(181.08778, 4069.329)	7.8962
CPD-14593	142233	133662	117234	111402	126792	121108	89175	1	92256	89360	102466	93485	102937	103876	95750	437309	313457	311724	1	453617	98471	447288	408314	414066	238718	196851	1	1	91400	112025	CPD-14593	CPD-14593 [ C14 H17 N O8, tgt=71.79, overall=71.79 ]			(329.09833, 1090.235)(347.54883, 16322.007)(350.00647, 8066.353)(350.1404, 5461.435)(327.12646, 290.245)(355.0975, 1937.2285)(333.68134, 5565.7437)	9.89888
CPD-14594	6147000	5976951	6375428	6341487	5972125	5956038	5558666	6451084	2094332	7167391	5343633	5416267	5526279	6367034	5985585	5913362	5712392	5668474	4528527	5236400	4325263	4340510	5752913	5660955	5250688	6001574	7057940	7042036	5686422	5657757	CPD-14594	CPD-14594 [ C16 H27 N O11, tgt=80.83, overall=80.83 ]			(411.16006, 132018.6)(412.6843, 11769.328)(413.1599, 5023.552)(393.1467, 509.10428)(397.17557, 1235.445)(409.1793, 166207.08)(410.18173, 28437.479)	5.0258
CPD-14592	129261	106613	1	1	84623	83331	129116	93502	1	1	1	1	166437	118894	1	1	1	1	107231	104133	81853	86282	1	1	116651	108648	1	1	1	1	CPD-14592	CPD-14592 [ C8 H7 N O3, tgt=63.20, overall=63.20 ]			(168.0495, 35231.7)(169.05096, 6318.2207)(167.13692, 2991.5715)(168.05, 45321.67)(166.0703, 7256.92)(170.0791, 5412.94)(189.19092, 5728.0513)(189.04175, 814.6013)(175.03543, 10113.277)	1.4038
CPD-14596	722761	675083	870823	863332	766855	734812	478912	445915	811320	817825	667351	658637	525713	532150	629048	631570	500695	520531	532638	490827	413249	411619	516363	1226170	586893	559105	1	684339	439991	443262	CPD-14596	CPD-14596 [ C17 H29 N O11, tgt=87.53, overall=87.53 ]			(424.1657, 1563.4976)(405.15323, 24058.965)(406.15695, 4268.531)(409.07498, 77561.164)(410.11282, 20679.875)(411.07846, 8064.3403)(411.18774, 4094.68)(442.22006, 898.1434)(449.7371, 2777.5178)(447.1641, 186.18)(428.15033, 222.17499)	5.2434
CPD-6955	1143126	1107958	1233429	1216562	1160437	1166759	777421	808764	1	671539	1130782	1139114	886147	903350	1040483	1057393	882691	888236	716768	711204	886391	856923	598947	581062	843915	877225	597074	555256	1211500	1216248	CPD-6955	CPD-6955 [ C15 H11 O5, tgt=61.28, overall=61.28 ]			(271.05765, 43185.316)(272.06058, 4771.7305)(295.04922, 76548.64)(296.05338, 9542.8125)	7.5284
CPD-6954	1152300	1110421	1913939	1915596	1447435	1398498	778317	812180	240007	226988	1135507	1141590	193178	908944	1045335	1063632	887141	893389	720580	716204	892047	862264	600932	584367	847009	879888	149059	141390	1216821	1222366	CPD-6954	CPD-6954 [ C15 H13 O6, tgt=61.28, overall=61.28 ]			(289.0665, 27642.691)(290.07156, 6182.758)(271.0576, 35529.08)(272.0604, 4610.0835)(293.84244, 9901.677)(292.08414, 1208.918)(309.64523, 2047.6705)(313.06686, 1130.5409)(295.04987, 80212.055)(296.05304, 9589.109)	6.09727
CPD-4619	3753101	3626844	4808099	4724760	4154909	4084833	2430837	2257008	4222297	4181153	3412407	3476968	2699587	2690285	3322089	3325627	2777608	2759630	2724261	2560357	2193598	2195420	2645912	2587220	3085567	2900050	2210526	2154028	2334712	2311933	CPD-4619	CPD-4619 [ C16 H23 N5 O6, tgt=75.59, overall=75.59 ]			(385.1781, 507.4908)(385.84964, 2600.19)(387.1955, 5398.71)(369.18396, 1523.2899)(404.2209, 5018.2227)(404.15125, 146954.14)(406.12366, 4945.174)(406.1579, 5943.26)(386.23343, 421.8442)	5.2428
CPD-8198	1	382137	1	178338	1	297423	504677	542394	633657	628278	599325	596632	1	483506	449755	455100	595241	627195	759702	757867	779135	780104	677934	649254	949623	1135127	674698	1	476384	469135	CPD-8198	CPD-8198 [ C13 H24 O10, tgt=47.32, overall=47.32 ]			(341.13358, 6709.5312)(342.1365, 541.2743)(325.14005, 3427.7476)(326.14325, 506.508)(342.04968, 4076.186)(342.13754, 544.06665)(325.1395, 2593.9492)(326.1426, 401.9969)(358.1607, 5343.343)(345.16272, 999.79224)(363.70352, 964.5276)(366.14465, 821.55)	14.4178
CPD-8192	788588	771097	971755	943392	848007	852051	1191881	1124737	966570	972431	968733	980248	1182541	1125674	1214785	1235591	1302559	1306279	1252684	1187369	1167125	1141908	1089505	1078653	1169802	1080591	906594	903841	1171471	1150673	CPD-8192	CPD-8192 [ C14 H14 O3, tgt=63.35, overall=63.35 ]			(231.0995, 40500.91)(232.10248, 4197.324)(235.13042, 7442.914)	9.1972
6-O-METHYLNORLAUDANOSOLINE	667463	604968	765328	774347	646480	688782	799716	646547	835449	818094	506671	486537	890157	823774	465766	585423	486471	467800	456282	445473	280012	1	552056	537612	600181	571856	526590	519544	512641	455355	6-O-METHYLNORLAUDANOSOLINE	6-O-METHYLNORLAUDANOSOLINE [ C17 H20 N O4, tgt=31.60, overall=31.60 ]			(303.13742, 1802.6984)(286.13596, 308.83835)(286.1365, 264.82)(325.1357, 20130.195)(326.1383, 2305.1677)(312.12625, 304.6509)	2.26138
RIBOSE-1-ARSENATE	146793	1	106713	97133	101059	102700	109675	445978	436509	384933	304272	267775	1	124766	96199	102854	81780	93009	211274	163161	150568	143234	135771	128728	137246	113882	115689	112723	108158	101087	RIBOSE-1-ARSENATE	RIBOSE-1-ARSENATE [ C5 H9 As O8, tgt=79.60, overall=79.60 ]			(272.12003, 2831.0881)(273.9542, 884.02)(255.9374, 1439.3633)(272.95316, 12706.483)(273.95337, 2376.2024)(274.95114, 740.3833)(296.94006, 750.69073)	1.38643
CPD-4620	3753101	3626844	4808099	4724760	4154909	4084833	2430837	2257008	4222297	4181153	3412407	3476968	2699587	2690285	3322089	3325627	2777608	2759630	2724261	2560357	2193598	2195420	2645912	2587220	3085567	2900050	2210526	2154028	2334712	2311933	CPD-4620	CPD-4620 [ C16 H23 N5 O6, tgt=75.59, overall=75.59 ]			(385.1781, 507.4908)(385.84964, 2600.19)(387.1955, 5398.71)(369.18396, 1523.2899)(404.2209, 5018.2227)(404.15125, 146954.14)(406.12366, 4945.174)(406.1579, 5943.26)(386.23343, 421.8442)	5.2428
CPD-4622	2058515	1950141	413163	421968	361585	1	480641	505756	584737	569399	1974758	473419	558682	604414	551758	540993	703807	717123	568542	600007	685644	689436	1867417	1796041	436465	501424	425717	410071	461316	460917	CPD-4622	CPD-4622 [ C22 H33 N5 O11, tgt=53.03, overall=53.03 ]			(525.2813, 27762.742)(526.2843, 5426.9565)(527.33966, 958.6359)(526.22205, 110598.15)(527.2242, 25533.967)(528.2258, 3791.1467)(565.27435, 1427.13)	9.6285
CPD-8186	14586739	13795568	1	1	1	18744304	13860953	12605485	17006138	16970576	19384508	18936022	15540930	14184591	19300938	19163212	13099555	13120719	16576506	15698309	16355442	16102785	14403652	14181489	13220554	11994008	1	8169239	17472706	17344084	CPD-8186	CPD-8186 [ C9 H6 O3, tgt=60.34, overall=60.34 ]			(163.03825, 528286.25)(164.041, 42631.023)(165.04308, 2619.8335)(145.02708, 3470.6836)	8.4522
PHLORETIN	889529	860994	350545	358104	692875	690920	1038728	1014241	1380169	1384431	1234463	1214878	898770	901425	1054253	1046000	1248499	1217166	1440937	1449027	1549605	1534228	1305647	1295639	967120	2114677	1431248	1448994	1099408	1078532	PHLORETIN	PHLORETIN [ C15 H14 O5, tgt=66.15, overall=66.15 ]			(257.07892, 20838.174)(258.08206, 1581.0634)(295.13007, 51647.54)(296.1331, 9423.337)(297.1369, 430.6)	16.167
CPD-12362	1797408	1	1927463	1862780	1781668	1772718	1412654	1281066	303992	300676	1685563	277244	1713771	1519950	1492424	237820	114675	1164181	1220478	1141417	958847	936230	1223458	1219091	1752491	201250	1570547	1588033	265452	141839	CPD-12362	CPD-12362 [ C19 H25 O6, tgt=34.26, overall=34.26 ]			(331.1499, 8910.957)(372.60504, 43866.965)(373.16385, 8547.083)(334.1609, 1229.675)(371.20123, 3257.665)(352.1714, 5985.86)(353.1738, 920.71)(357.59488, 2378.8826)	8.8885
CPD-12367	542662	543768	654634	667801	629463	621536	820116	627288	785995	789946	547132	574622	1004149	791085	765589	753117	748330	753417	1017626	771921	788024	787219	696395	690708	939284	737815	702623	687411	653088	654034	CPD-12367	CPD-12367 [ C10 H12 N5 O9 P, tgt=86.11, overall=86.11 ]			(395.06924, 40585.48)(396.07196, 5160.4194)(397.06937, 1402.9874)	6.2554
N-DELTA-PHOSPHONOACETYL-L-ORNITHINE	1	135943	131336	124919	177794	150791	1	129969	372752	384008	341417	326552	227367	1	126874	285038	126325	126943	1	146568	442703	446855	362951	359525	614665	610119	1	105585	304394	294219	N-DELTA-PHOSPHONOACETYL-L-ORNITHINE	N-DELTA-PHOSPHONOACETYL-L-ORNITHINE [ C7H14N2O6P, tgt= ]			(257.06525, 837.6359)(257.53177, 45510.965)(258.08142, 7243.9844)(239.0679, 14376.398)(240.07124, 954.1338)(271.09357, 11119.496)(272.09677, 908.56)(253.08318, 5638.404)	12.5033
OH-MYRISTOYL	82902	75118	155882	156779	1	1	147265	135566	220552	207603	159802	168239	1130989	1105275	132955	699585	1477160	1475117	1417457	1390437	472939	2547181	292441	258375	757863	702665	274258	275206	172647	160157	OH-MYRISTOYL	OH-MYRISTOYL [ C43 H75 N3 O20 P2, tgt=14.87, overall=14.87 ]			(998.8482, 12934.635)(1000.01794, 8175.174)(1001.4234, 2687.6968)(1002.426, 370.74)(999.41705, 31700.658)(1000.42004, 18246.984)(1001.42224, 4102.9473)	19.1461
CPD-12399	6895317	6652742	6156683	5976054	6249794	1	9232862	9710502	10204297	2195969	2318150	7562752	8479808	9052404	7747050	7717823	8074455	8106175	2177068	2211144	2118828	2163228	2356294	2149974	10124790	10975199	13389020	13215874	8157348	8059022	CPD-12399	CPD-12399 [ C18 H31 N4 O7 S2, tgt=63.73, overall=63.73 ]			(461.15643, 3876.2925)(498.19867, 1564.3759)(479.18503, 90336.945)(480.18726, 17331.74)(481.1914, 3661.4922)(482.19888, 169.61)(484.14346, 23498.137)(485.14435, 3888.6313)	8.43573
CPD-6989	113747	116033	104862	107489	109666	110631	128348	124849	84913	86527	103379	110021	338438	296616	122494	119622	146255	147622	94309	89227	102392	102632	1	1	88355	1	1	1	114684	117304	CPD-6989	CPD-6989 [ C13 H9 O5, tgt=19.16, overall=19.16 ]			(249.0588, 674.24)(230.727, 3912.5342)(228.0402, 149.58)(247.55746, 671.225)(231.04836, 3509.6084)(263.14105, 7195.0625)(271.0486, 639.02)(272.0508, 152.76)	5.545
CPD-12398	764865	729869	748333	750999	721441	716517	768886	776155	657468	672776	878986	904221	654183	700315	801621	796901	863034	833654	773205	783351	860678	874269	661527	682999	679576	686621	605342	622776	924754	892017	CPD-12398	CPD-12398 [ C8 H17 N O2 S, tgt=47.54, overall=47.54 ]			(192.108, 2051.7349)(211.1294, 1183.4828)(193.12012, 1821.223)(197.07866, 920.2114)	4.8794
CPD-12396	914693	882835	693439	697745	738636	740589	1018936	917724	722666	713077	1	685491	1181443	903483	749775	804381	695626	1	1234386	1	1108348	1130782	914435	868407	732231	616381	768422	736792	682594	652290	CPD-12396	CPD-12396 [ C17 H29 N4 O7 S2, tgt=58.30, overall=58.30 ]			(466.14987, 16263.961)(467.1547, 1398.6412)(452.1224, 2895.59)(483.1843, 19782.14)(484.187, 2027.3)	3.8116
CPD-12395	165909	164302	98814	97864	95676	169114	289743	248790	417940	422978	334020	1	395186	330809	234456	241656	150889	141251	202708	168383	1	116212	188892	184274	162007	164730	137981	142432	103827	104396	CPD-12395	CPD-12395 [ C7 H15 N O2 S, tgt=24.91, overall=24.91 ]			(181.90598, 11160.836)(182.07956, 8763.88)(159.356, 6506.0786)(163.07285, 12521.115)(195.12047, 10538.794)(179.10515, 3292.96)(185.06334, 174690.81)(187.06422, 118964.516)	2.34353
LATHYRINE	907889	794493	1063230	1013866	879688	900529	1185310	896200	923110	928185	1188883	1172124	1289744	977859	1037080	1032658	1151561	1119112	2020735	1554229	1577120	1525705	1321014	1313468	1748037	1268430	705853	684081	1204408	1217493	LATHYRINE	LATHYRINE [ C7 H10 N4 O2, tgt=85.15, overall=85.15 ]			(182.07968, 47446.59)(183.08261, 3281.1484)(166.00447, 5121.713)(202.11664, 2567.0923)(204.1219, 240.56)	2.1292
CPD-8179	776874	531705	397898	410430	426070	514231	930598	585995	258921	194515	176798	178648	1194660	722630	271966	856879	446401	201075	683694	276939	383255	500780	205545	323476	1361277	1072242	214304	457199	322637	257671	CPD-8179	CPD-8179 [ C6 H3 N2 O5, tgt=44.86, overall=44.86 ]			(185.0133, 747.43005)(185.01443, 1013.08795)(168.01, 93.12)(201.04259, 31124.729)(202.0469, 1592.6836)(188.03688, 4698.636)	1.3948
CPD-12394	358533	335511	533857	531416	462479	298676	334009	294895	253648	253066	1704292	213076	1	221157	222335	185011	1	1	4855015	4812429	4897417	4815496	4548410	4529646	238068	223276	245425	237171	214951	204575	CPD-12394	CPD-12394 [ C11 H21 N3 O4 S2, tgt=47.32, overall=47.32 ]			(323.43497, 8998.674)(307.75455, 1920.0122)(324.11032, 2058.8066)(308.08804, 1423.605)(344.8953, 4956.141)(342.13657, 719.2734)(346.46948, 93691.44)(347.09848, 13713.628)(348.1001, 434.92502)(331.07523, 3585.571)	5.76659
CPD-8178	542067	360711	26233278	27098752	20477980	18349176	4773388	4777515	8496601	8198548	10260697	10487360	2942082	2868366	7402073	7665512	10241631	10511605	25216692	25688680	3782674	3488862	27032508	1322919	5366409	5498717	8366947	8530551	10557429	10351276	CPD-8178	CPD-8178 [ C55 H72 N4 O6, tgt=21.39, overall=21.39 ]			(885.6868, 26957.469)(886.6896, 14683.401)(887.7064, 5899.276)(888.5578, 250.08)(871.5627, 75810.79)(872.5658, 46272.27)(873.5677, 12334.35)(885.54376, 106854.96)(886.5467, 60735.75)(887.5519, 28097.22)(888.55743, 10545.038)(889.5617, 2511.23)(870.89185, 16949.658)(871.9008, 203968.23)(872.90356, 117748.46)(873.9055, 31508.049)(874.5732, 6118.764)(907.52374, 15120.133)(908.52655, 8041.256)(909.52…	28.7182
CPD-12393	16862116	16396537	17602504	17178180	16389203	1	21032460	891619	16933520	16941168	17829136	714547	18584498	20013268	918804	22340850	1268633	25388684	977816	22259408	1136600	23558354	19550074	20083964	629535	19979842	17524250	17581652	21515170	21194436	CPD-12393	CPD-12393 [ C16 H27 N4 O7 S2, tgt=66.64, overall=66.64 ]			(435.12158, 157356.6)(436.12405, 27523.42)(437.1161, 5137.0815)(438.1262, 152.94)(435.12222, 363942.25)(436.1247, 65080.887)(437.12518, 10098.279)(469.16156, 763.948)(457.16336, 1016.8214)(477.1322, 1265.2468)	9.1584
CPD-12392	805342	774448	1310457	1321398	1023542	1261947	1731330	1654260	1837288	1838025	2076497	2123826	1814738	1495978	2024156	2022174	1931717	1893779	2149783	2116449	1871024	1887290	2014890	1662205	2751571	2679738	1573741	1555959	1993105	1991424	CPD-12392	CPD-12392 [ C6 H13 N O2 S, tgt=47.29, overall=47.29 ]			(146.05875, 33037.22)(146.20958, 27855.703)(147.06187, 2522.0674)(184.0952, 330.30502)(167.06885, 977.445)(169.04799, 4104.6455)(165.08934, 2859.0298)(166.08519, 320.48145)	4.295
CPD-12391	1	442661	491639	486385	457331	443148	432767	307841	374002	373909	587722	407833	495899	335480	530913	527846	359773	359483	640880	204355	408848	398348	655891	170312	237723	197329	191738	192254	316251	359670	CPD-12391	CPD-12391 [ C10H19N3O4S2, tgt= ]			(314.0877, 4466.185)(293.05988, 4064.7578)(314.94165, 115543.38)(316.08652, 19689.541)(292.083, 402.78)(334.9693, 3927.2134)(336.666, 2966.3599)	10.2476
CPD-4607	859467	828248	682909	680422	746627	770152	846951	854640	785693	794918	976279	972541	1117024	1098135	736583	729949	684776	681062	761990	715518	534109	532818	839366	823875	932366	885847	1061501	1009374	889159	883208	CPD-4607	CPD-4607 [ C18 H21 N5 O5, tgt=75.27, overall=75.27 ]			(388.15588, 44309.496)(389.1586, 6537.9688)	7.4292
CPD-6981	2577001	2492636	2960411	2908223	2669890	2636902	3787122	3426256	2945432	2915073	3031563	1	3750696	3388902	3533513	3564020	3940079	3917399	3807252	3504416	3635178	3568476	3332759	3164516	3683054	3266350	2809217	2789130	3504974	3467275	CPD-6981	CPD-6981 [ C18 H15 O8, tgt=47.94, overall=47.94 ]			(361.08636, 346.59)(345.0915, 932.4443)(377.11926, 106507.67)(378.12183, 17817.447)(379.12415, 1479.7084)(359.10815, 19919.91)(360.11124, 2450.449)	9.19876
CPD-12390	368070	367390	105236	105058	405812	403177	134802	123101	186688	178721	1	134621	328116	282414	265802	250183	346009	338534	329509	326209	290088	266069	1	265208	122653	116389	364974	356290	147495	151586	CPD-12390	CPD-12390 [ C15 H25 N4 O7 S2, tgt=17.43, overall=17.43 ]			(421.10583, 22880.97)(422.10864, 2833.9934)(441.14716, 89950.89)(442.14954, 15110.816)(443.147, 6873.9487)(462.09042, 2369.9233)(447.08682, 3965.7717)	10.0842
CIS-3-HEXENOL	2362633	2240253	1396521	1372370	1777156	1759713	2275654	2371874	2174748	1	1824512	1782296	1367967	1392511	1697001	1699046	1705558	1690465	1930106	1918598	1810641	1770586	1876619	1851731	2536495	2535891	2846943	2716957	2376094	2381712	CIS-3-HEXENOL	CIS-3-HEXENOL [ C6 H12 O, tgt=70.83, overall=70.83 ]			(105.069305, 74926.766)(106.07249, 4720.3525)	7.897
ADIPATE	1	614496	796231	780330	693130	1	1086260	1026230	846021	849048	901905	866681	1076462	1013399	1128982	1109815	1717126	1759429	1178132	1099201	1127846	1131199	1070493	1026334	1025922	944341	771631	739518	1054693	1055329	ADIPATE	ADIPATE [ C6H8O4, tgt= ]			(127.03806, 37469.97)(128.0413, 870.22626)(165.0884, 587.2)(145.0487, 5047.866)	9.1952
CPD-4602	672548	644134	702726	703181	661618	656138	802953	736701	836749	832196	783515	789854	961588	868849	798173	794201	684852	690637	742015	663719	583159	577097	704957	676974	866451	734586	712730	665236	704166	707655	CPD-4602	CPD-4602 [ C16 H23 N5 O5, tgt=76.11, overall=76.11 ]			(348.16147, 37635.312)(349.1641, 4631.667)	8.93173
CPDQT-350	1468030	1228235	1632589	1633735	1477027	1479663	1471624	1455439	1937576	1922830	1455462	1411997	1550936	1595069	1441986	1431357	1275787	1256073	1228055	1232155	990481	871725	1396124	1389525	1453025	1435829	1374503	1586497	1316066	1285398	CPDQT-350	CPDQT-350 [ C9 H19 N O S, tgt=68.33, overall=68.33 ]			(193.12012, 1327.9419)(190.12871, 3366.631)(209.14934, 20216.2)(210.15404, 1255.3442)(191.14058, 8605.838)	5.0158
CPD-8161	232426	249829	132672	152628	161461	127349	89963	704568	356312	332675	454348	436717	614127	636996	386508	382487	390180	370577	293083	261937	95509	91931	1	381957	117749	100266	416740	411202	406097	398124	CPD-8161	CPD-8161 [ C49 H88 O15, tgt=0.01, overall=0.01 ]			(934.6324, 11397.938)(935.63617, 3251.125)(942.2262, 3646.1216)	22.4202
CPD-8162	3360482	3632012	11294863	11254242	10707184	10117582	8226889	8080676	12591633	1	12433136	12023600	7154701	7285263	12591328	12247272	11985899	11951827	11254132	10871472	6943055	7166598	1	11671367	7466368	7307049	12220339	11907467	12567382	12488431	CPD-8162	CPD-8162 [ C49 H86 O15, tgt=52.32, overall=52.32 ]			(932.62274, 215884.39)(933.6255, 107650.6)(934.62665, 27642.824)(935.62787, 4365.945)(937.5763, 46490.49)(938.5789, 21980.736)(939.5805, 4884.391)	21.9212
CPD-8160	225125	214306	1	1	1	1	198936	196663	1	1	1	1	238972	235219	1	1	1	1	1	1	194450	193626	1	1	290949	293364	1	1	1	1	CPD-8160	CPD-8160 [ C49 H90 O15, tgt=15.93, overall=15.93 ]			(920.67706, 14399.919)(921.6797, 5818.2866)(922.68304, 864.28503)	19.4458
DEACETYLISOIPECOSIDE	2059779	1950565	2212947	2184380	2038101	1987278	1980711	1834745	2117910	2064290	1974758	1974977	1840337	1828598	1690142	1698879	1761762	1733059	2055480	1906731	1794520	1765596	1866992	1795554	1467641	1380501	1470932	1454457	2067819	2076978	DEACETYLISOIPECOSIDE	DEACETYLISOIPECOSIDE [ C25 H34 N O11, tgt=71.66, overall=71.66 ]			(551.2028, 922.71)(542.25757, 521.05)(526.2229, 110922.5)(527.2251, 25816.215)(528.2265, 3759.0598)(533.1913, 1056.9349)	5.5834
CPD-8165	218709	240170	11001200	12090641	5378019	1973881	1822266	1748596	5708941	5167732	1	1	1866986	1769239	1	3763377	4033710	2203820	8806466	8727324	1	1	13629176	13831723	1174525	622896	2149363	4735559	2306690	9674829	CPD-8165	CPD-8165 [ C45 H78 O10, tgt=17.37, overall=17.37 ]			(780.0171, 92427.16)(781.02026, 39802.71)(782.5506, 10599.775)(783.5521, 1992.236)(782.56055, 94394.59)(781.55194, 102927.414)(782.55383, 21585.16)(783.5568, 2160.46)(796.58453, 51503.484)(797.58374, 26514.252)(798.5857, 5993.5576)(782.617, 126.7)(803.5457, 8049.3965)(802.7407, 5481.3604)(788.5325, 544.96)	24.5955
CPD-8163	232426	249829	132672	152628	161461	127349	89963	704568	356312	332675	454348	436717	614127	636996	386508	382487	390180	370577	293083	261937	95509	91931	1	381957	117749	100266	416740	411202	406097	398124	CPD-8163	CPD-8163 [ C49 H88 O15, tgt=0.01, overall=0.01 ]			(934.6324, 11397.938)(935.63617, 3251.125)(942.2262, 3646.1216)	22.4202
CPD-8164	3360482	3632012	11294863	11254242	10707184	10117582	8226889	8080676	12591633	1	12433136	12023600	7154701	7285263	12591328	12247272	11985899	11951827	11254132	10871472	6943055	7166598	1	11671367	7466368	7307049	12220339	11907467	12567382	12488431	CPD-8164	CPD-8164 [ C49 H86 O15, tgt=52.32, overall=52.32 ]			(932.62274, 215884.39)(933.6255, 107650.6)(934.62665, 27642.824)(935.62787, 4365.945)(937.5763, 46490.49)(938.5789, 21980.736)(939.5805, 4884.391)	21.9212
CPD-4608	859467	828248	682909	680422	746627	770152	846951	854640	785693	794918	976279	972541	1117024	1098135	736583	729949	684776	681062	761990	715518	534109	532818	839366	823875	932366	885847	1061501	1009374	889159	883208	CPD-4608	CPD-4608 [ C18 H21 N5 O5, tgt=75.27, overall=75.27 ]			(388.15588, 44309.496)(389.1586, 6537.9688)	7.4292
BISOHMYR-GLUCOSAMINYL-1P	1886446	1828470	1842980	1	1862760	1817660	1747594	1705831	1236985	1228391	835181	746092	1797877	1760294	1570537	904517	1538176	1573098	957995	882058	1342324	1343988	1904559	1816332	1171439	1128092	1313245	1411686	1919630	1862341	BISOHMYR-GLUCOSAMINYL-1P	BISOHMYR-GLUCOSAMINYL-1P [ C34 H64 N O12 P, tgt=44.69, overall=44.69 ]			(691.47455, 33514.992)(692.47723, 10660.583)(693.4953, 963.8221)(692.3985, 56456.36)(693.4007, 15649.01)(694.4023, 2296.51)(714.3074, 805.8726)(714.46564, 1207.7666)(736.4229, 329.57)(719.3191, 4299.0117)(720.3752, 1449.177)(720.4254, 1286.62)	17.7174
PROPIONYL_ADENYLATE	745995	732097	812856	815049	790469	795277	794857	553600	710286	697329	571462	574952	696199	506504	629660	634982	593904	589639	822099	264858	521693	174678	357284	354663	789061	582208	492821	490312	500386	499013	PROPIONYL_ADENYLATE	PROPIONYL_ADENYLATE [ C13 H17 N5 O8 P, tgt=51.76, overall=51.76 ]			(403.0946, 10597.598)(405.11072, 3992.7976)(425.07947, 30595.174)(426.082, 4081.7808)(427.0804, 563.44666)	5.06313
CPD-12389	517579	483177	693663	500703	476149	657048	906790	150969	189821	755221	868784	800963	157089	144127	723797	754020	903611	867702	1254128	1057088	910255	909019	1033863	1043535	1207973	964734	827605	797552	958476	905173	CPD-12389	CPD-12389 [ C5 H11 N O2 S, tgt=49.49, overall=49.49 ]			(150.05373, 4754.2134)(154.04848, 969.5214)(152.05585, 5319.923)(137.04524, 2078.85)(167.08806, 16167.052)(168.09044, 592.0833)	2.6982
CPD-12388	4131279	3929502	2199512	1198001	1	1	3685469	3853943	1	1	1	1	1406839	1	1	1434265	3128263	1	1	1	1	1	3263508	3165261	4138838	4424364	5105066	5228959	4333122	4323599	CPD-12388	CPD-12388 [ C15 H18 N4 O4 S, tgt=53.33, overall=53.33 ]			(351.09958, 13267.846)(352.1049, 4307.2466)(353.1002, 2809.3398)(332.10196, 7385.3535)(333.0924, 9419.177)(371.14392, 286.785)(351.18585, 135416.66)(351.71942, 10972.883)(352.11, 1621.705)	6.92328
CPD-4610	3718120	3597598	3493869	3517955	3495001	3497013	3050002	2841428	3070844	3020765	3125054	3102647	3243122	2889610	3038713	3017441	2421708	2413922	2366581	2196279	2010736	1598981	1193232	2182695	3384597	2986510	2880936	2939992	2602481	2596403	CPD-4610	CPD-4610 [ C16 H19 N5 O6, tgt=29.67, overall=29.67 ]			(379.13232, 16148.338)(380.13474, 2304.0508)(379.14545, 1037.8049)(397.1813, 384.81)	10.2842
CPD-13420	396972	364813	353327	364930	350188	331536	270144	275633	373093	371023	248245	248227	267783	268170	266267	281093	211074	198063	1	217541	1	175853	226399	215032	199320	203861	231743	216205	207064	204327	CPD-13420	CPD-13420 [ C18 H28 N O5, tgt=36.41, overall=36.41 ]			(344.223, 244.27333)(366.2077, 893.25366)(343.17093, 12593.9)(344.1728, 1250.5765)	4.34607
CPD-6998	1024982	1000999	1111695	1089398	1044649	1051841	708237	737664	599252	605047	1010986	1027674	803361	813862	937910	951414	795750	803177	659482	647401	800348	773400	545324	533707	765657	795688	539871	506454	1088872	1094587	CPD-6998	CPD-6998 [ C15 H10 O5, tgt=68.30, overall=68.30 ]			(271.05765, 42230.95)(272.06058, 4648.317)(295.0494, 77533.125)(296.05362, 9707.385)	7.528
CPD-12384	682246	649608	1498529	734085	1180723	1159621	1980571	1742957	3198732	3224299	1979896	621407	2030535	1	1745875	505618	1137693	1141793	925364	975420	1164062	1135407	305370	360776	571717	1	587994	808164	697106	643280	CPD-12384	CPD-12384 [ C18 H23 N4 O7 S, tgt=69.59, overall=69.59 ]			(427.133, 41117.547)(428.13583, 6545.2656)(459.17548, 14025.936)(439.15228, 42864.43)(440.15472, 5786.5845)(441.15277, 3884.9597)(465.11252, 2396.31)(449.1013, 5111.758)	4.08847
GLC	1881516	1775169	1015623	1038205	1445338	1446910	2090213	1942997	1764508	1732692	1499740	1469236	1025401	961814	1310607	1268838	1385363	1374892	1673864	1563560	1470763	1476630	1517889	1524058	2227394	2009619	2323737	2291864	2013114	1978317	GLC	GLC [ C6 H12 O6, tgt=75.37, overall=75.37 ]			(163.0586, 1073.2479)(180.08531, 77440.336)(181.08778, 4069.329)	7.8962
CPD-12387	7434339	1920234	926204	279074	1302245	254432	351953	387996	2132823	371069	9522774	1682651	338858	358135	4658189	2061478	283912	4620623	5968978	9390838	9498784	9407811	9545877	9353358	958079	317321	1352515	1946167	250347	242666	CPD-12387	CPD-12387 [ C20 H24 N5 O7 S, tgt=44.80, overall=44.80 ]			(483.14188, 118462.055)(484.14426, 20229.861)(465.13196, 23030.67)(466.13446, 4034.7126)(483.1426, 159558.89)(484.14502, 28569.055)(485.1459, 4824.32)(461.1496, 882.632)(502.78458, 705.36993)	9.2904
CPD-12386	1	1	119492	117312	105987	104873	146409	140825	120087	120106	1	119075	1	113666	124339	128996	151372	156176	139985	132056	114803	148983	129722	128779	1379134	1	1	1	117309	116463	CPD-12386	CPD-12386 [ C10 H10 N2 O2, tgt=18.88, overall=18.88 ]			(190.07451, 6972.4155)(175.073, 7073.48)(175.07364, 7281.3936)(209.11479, 1738.0281)(190.09256, 6733.257)(213.0628, 17038.31)(214.0639, 121.35)(215.0578, 130.0)(199.05814, 2593.5876)	6.63537
CPD-6994	5385006	5247556	7344210	7319049	6234193	6195212	4214713	4309750	4123185	1560051	1675643	6150511	5343156	5647188	5990044	5880890	4798342	4788761	4187563	1454392	1409196	1419814	1407759	1404416	3783937	3882555	2894467	2742939	5270643	5178231	CPD-6994	CPD-6994 [ C15 H11 O6, tgt=78.86, overall=78.86 ]			(271.05692, 15749.995)(272.0599, 2037.6068)(287.05286, 175610.67)(288.0555, 22296.176)(289.058, 2551.7844)(289.06378, 2908.645)(295.04166, 43826.215)(296.0445, 4533.6226)	6.9778
CPD-12381	1261745	1255242	1714064	1691920	1466859	1477026	2018677	1929729	2250703	2207887	1995175	2009083	3003602	2789645	2722618	2717782	3036536	3053569	3028905	2916368	2928513	2929037	2783970	2885024	1823048	1688803	1238738	1266916	2038355	2035033	CPD-12381	CPD-12381 [ C10 H13 N5 O5, tgt=73.40, overall=73.40 ]			(266.08377, 1578.615)(284.09506, 140553.48)(285.09763, 11513.452)(286.09872, 753.4664)(290.08307, 838.391)	10.418
CPD-4617	3238384	1	4469196	4514214	3792721	3791677	5706576	5662694	6809947	6757277	5143035	5012795	6990968	6866946	7188546	7015202	8211460	8106220	5295394	4890633	4891501	4924087	4819969	4637507	4508070	4269497	4127310	3917900	4885129	4751673	CPD-4617	CPD-4617 [ C16 H25 N5 O6, tgt=66.49, overall=66.49 ]			(366.1726, 155118.66)(367.17502, 20881.229)(368.17654, 2743.9905)(409.17548, 10653.676)(410.1822, 1262.9203)(411.1931, 168.21)(388.15594, 26104.926)(389.15857, 4156.46)	7.2144
TARTRATE	515243	517256	223403	288212	320693	330374	451626	436253	218881	261549	161255	1	566428	389151	227808	216602	237640	225470	350293	212025	378996	326245	242800	206394	390171	362518	190599	195199	193491	161576	TARTRATE	TARTRATE [ C4 H4 O6, tgt=46.41, overall=46.41 ]			(153.00882, 530.80286)(129.99312, 29087.527)(130.99878, 890.365)(130.99936, 994.192)(170.0475, 4415.2017)(171.04886, 4950.8525)(153.03827, 1043.9126)	1.39638
CPD-6995	250709	230752	222643	214136	245900	228294	1086260	1026230	1	389814	901905	239596	1076462	1013676	1129373	1109815	1717960	1759429	1178132	1100137	1127846	1130468	1070493	1026334	1025922	940610	380772	267705	1054693	1055329	CPD-6995	CPD-6995 [ C4 H10 O4, tgt=47.59, overall=47.59 ]			(109.064186, 3742.765)(145.09975, 1122.11)(145.04863, 5577.675)(127.037895, 27939.584)(128.0413, 870.22626)	8.59957
CPD-4618	3753101	3626844	4808099	4724760	4154909	4084833	2430837	2257008	4222297	4181153	3412407	3476968	2699587	2690285	3322089	3325627	2777608	2759630	2724261	2560357	2193598	2195420	2645912	2587220	3085567	2900050	2210526	2154028	2334712	2311933	CPD-4618	CPD-4618 [ C16 H23 N5 O6, tgt=75.59, overall=75.59 ]			(385.1781, 507.4908)(385.84964, 2600.19)(387.1955, 5398.71)(369.18396, 1523.2899)(404.2209, 5018.2227)(404.15125, 146954.14)(406.12366, 4945.174)(406.1579, 5943.26)(386.23343, 421.8442)	5.2428
CPD-12383	116244	93326	110709	107705	100051	95060	154727	110082	110754	98745	111227	109606	185194	121562	110993	90036	110182	98670	165878	108552	97008	99528	101844	105635	157674	104880	95397	102570	115274	123273	CPD-12383	CPD-12383 [ C8 H9 N O2, tgt=42.94, overall=42.94 ]			(139.0725, 1617.8267)(174.0555, 4541.2207)(156.04385, 4305.325)	1.394
CPD-4615	3238384	1	4469196	4514214	3792721	3791677	5706576	5662694	6809947	6757277	5143035	5012795	6990968	6866946	7188546	7015202	8211460	8106220	5295394	4890633	4891501	4924087	4819969	4637507	4508070	4269497	4127310	3917900	4885129	4751673	CPD-4615	CPD-4615 [ C16 H25 N5 O6, tgt=66.49, overall=66.49 ]			(366.1726, 155118.66)(367.17502, 20881.229)(368.17654, 2743.9905)(409.17548, 10653.676)(410.1822, 1262.9203)(411.1931, 168.21)(388.15594, 26104.926)(389.15857, 4156.46)	7.2144
CPD-8168	54676036	56798912	85771016	85340824	89466272	76322776	74635560	72609632	78404376	75099208	77537240	72077408	68111912	68417712	79258432	76849824	74538512	73372056	77279000	74381944	68367024	66067712	74386960	73791200	74801952	73943056	79239824	77519480	79501896	79017128	CPD-8168	CPD-8168 [ C45 H74 O10, tgt=67.32, overall=67.32 ]			(774.6248, 760.4726)(775.5254, 4757.722)(776.5285, 1122.3435)(777.5318, 421.06)(757.5154, 7400.9673)(758.5196, 2409.3425)(792.55566, 949049.0)(793.55884, 458037.3)(794.56226, 143978.92)(795.5651, 29654.18)(796.56744, 4075.6787)(779.04376, 415.805)(797.51, 173219.03)(798.51373, 76919.62)(799.51776, 21454.525)(800.5236, 2861.9236)(801.52893, 125.1725)	22.2778
CPD-4616	3238384	1	4469196	4514214	3792721	3791677	5706576	5662694	6809947	6757277	5143035	5012795	6990968	6866946	7188546	7015202	8211460	8106220	5295394	4890633	4891501	4924087	4819969	4637507	4508070	4269497	4127310	3917900	4885129	4751673	CPD-4616	CPD-4616 [ C16 H25 N5 O6, tgt=66.49, overall=66.49 ]			(366.1726, 155118.66)(367.17502, 20881.229)(368.17654, 2743.9905)(409.17548, 10653.676)(410.1822, 1262.9203)(411.1931, 168.21)(388.15594, 26104.926)(389.15857, 4156.46)	7.2144
CPD-8167	4308716	1831544	5836334	6245837	2500150	3607514	1905632	1832200	5507895	5367738	1	3569776	2456064	2431479	5468276	5454310	5312545	5303015	6311411	4396343	2385009	778994	8437923	8135247	762744	1842844	4004600	4775763	5197923	5056325	CPD-8167	CPD-8167 [ C45 H76 O10, tgt=21.06, overall=21.06 ]			(778.66504, 94221.01)(779.53265, 46729.625)(780.53485, 9191.585)(781.5372, 1135.7925)(761.1107, 2740.9011)(780.7017, 154094.1)(781.7045, 67326.63)(782.3685, 16241.425)(783.5543, 1933.4926)(764.5342, 1586.09)(795.2304, 12748.004)(795.566, 9523.26)(796.5699, 1256.135)(801.75226, 4204.933)(802.32477, 1866.5638)(781.5345, 150.0)	25.148
CPD-4613	3753101	3626844	4808099	4724760	4154909	4084833	2430837	2257008	4222297	4181153	3412407	3476968	2699587	2690285	3322089	3325627	2777608	2759630	2724261	2560357	2193598	2195420	2645912	2587220	3085567	2900050	2210526	2154028	2334712	2311933	CPD-4613	CPD-4613 [ C16 H23 N5 O6, tgt=75.59, overall=75.59 ]			(385.1781, 507.4908)(385.84964, 2600.19)(387.1955, 5398.71)(369.18396, 1523.2899)(404.2209, 5018.2227)(404.15125, 146954.14)(406.12366, 4945.174)(406.1579, 5943.26)(386.23343, 421.8442)	5.2428
CPD-6991	1	1	1	1	1	1	1	1	1	1	1	1	1	1	1	1	1	1	1	1	1	1	1	1	115623	106539	1	1	1	1	CPD-6991	CPD-6991 [ C15 H11 O4, tgt= ]			(257.0791, 104151.81)(258.0818, 13737.96)(239.0683, 24927.09)(240.07184, 2592.98)	16.154
CPD-4614	3753101	3626844	4808099	4724760	4154909	4084833	2430837	2257008	4222297	4181153	3412407	3476968	2699587	2690285	3322089	3325627	2777608	2759630	2724261	2560357	2193598	2195420	2645912	2587220	3085567	2900050	2210526	2154028	2334712	2311933	CPD-4614	CPD-4614 [ C16 H23 N5 O6, tgt=75.59, overall=75.59 ]			(385.1781, 507.4908)(385.84964, 2600.19)(387.1955, 5398.71)(369.18396, 1523.2899)(404.2209, 5018.2227)(404.15125, 146954.14)(406.12366, 4945.174)(406.1579, 5943.26)(386.23343, 421.8442)	5.2428
CPD-6992	1143126	1107958	1233429	1216562	1160437	1166759	777421	808764	1	671539	1130782	1139114	886147	903350	1040483	1057393	882691	888236	716768	711204	886391	856923	598947	581062	843915	877225	597074	555256	1211500	1216248	CPD-6992	CPD-6992 [ C15 H11 O5, tgt=61.28, overall=61.28 ]			(271.05765, 43185.316)(272.06058, 4771.7305)(295.04922, 76548.64)(296.05338, 9542.8125)	7.5284
CPD-4611	3718120	3597598	3493869	3517955	3495001	3497013	3050002	2841428	3070844	3020765	3125054	3102647	3243122	2889610	3038713	3017441	2421708	2413922	2366581	2196279	2010736	1	1	2182695	3384597	2986510	2880936	2939992	2602481	2596403	CPD-4611	CPD-4611 [ C16 H19 N5 O6, tgt=29.67, overall=29.67 ]			(379.13135, 17227.66)(380.13474, 2304.0508)(397.1813, 384.81)	9.968
CPD-4612	3753101	3626844	4808099	4724760	4154909	4084833	2430837	2257008	4222297	4181153	3412407	3476968	2699587	2690285	3322089	3325627	2777608	2759630	2724261	2560357	2193598	2195420	2645912	2587220	3085567	2900050	2210526	2154028	2334712	2311933	CPD-4612	CPD-4612 [ C16 H23 N5 O6, tgt=75.59, overall=75.59 ]			(385.1781, 507.4908)(385.84964, 2600.19)(387.1955, 5398.71)(369.18396, 1523.2899)(404.2209, 5018.2227)(404.15125, 146954.14)(406.12366, 4945.174)(406.1579, 5943.26)(386.23343, 421.8442)	5.2428
VITEXIN	1	1	1	1	1	1	157049	161230	257217	250712	188497	171977	102124	175027	225471	237807	258437	274324	145716	148955	1	1	146065	143619	193036	215319	1	1	1	1	VITEXIN	VITEXIN [ C21 H19 O10, tgt= ]			(437.1246, 11444.1)(435.12207, 274621.34)(436.12448, 46037.688)(437.12534, 7430.769)(449.13556, 11063.511)(450.1392, 1389.6365)(432.86566, 73485.83)(435.37143, 283742.1)(436.12354, 61323.28)	9.5312
CPD-11281	148262	148496	237767	233527	184661	175390	364037	349223	263521	260914	276350	269025	354389	316949	380677	378888	449412	442758	396053	392260	377069	394662	350096	337673	344468	316455	216720	211214	354327	339799	CPD-11281	CPD-11281 [ C10 H16 N3 O6 S2, tgt=3.74, overall=3.74 ]			(323.0508, 495.15002)(357.07742, 17837.6)(358.08, 1363.4391)(339.06766, 18442.115)(340.0703, 1702.8582)	9.188
CPD-4661	1760764	1688872	1666300	1643898	1639730	1610293	1638464	1494498	1752271	1736768	1862493	1887481	1955528	1780591	1761324	1774142	1617331	1604351	2031035	1859773	1639025	1	1	1	2258699	2070000	1909883	1882484	1778900	1736046	CPD-4661	CPD-4661 [ C15 H24 O2, tgt=44.43, overall=44.43 ]			(241.1527, 57310.68)(242.1555, 6180.071)	2.22
CPD-11287	9418384	9641537	10586392	10349023	9851416	9990194	9876181	9737779	10755192	10647791	672361	11351576	10702454	10895937	10495578	10241005	11195558	11425034	10564437	10450243	11992939	671106	8634457	7996269	10795789	10669489	8654749	8545914	10979255	10765805	CPD-11287	CPD-11287 [ C15 H24, tgt=67.89, overall=67.89 ]			(205.19395, 248927.34)(206.19664, 32715.732)(207.19968, 725.297)	16.5222
CPD-4664	9418384	9641537	10586392	10349023	9851416	9990194	9876181	9737779	10755192	10647791	672361	11351576	10702454	10895937	10495578	10241005	11195558	11425034	10564437	10450243	11992939	671106	8634457	7996269	10795789	10669489	8654749	8545914	10979255	10765805	CPD-4664	CPD-4664 [ C15 H24, tgt=67.89, overall=67.89 ]			(205.19395, 248927.34)(206.19664, 32715.732)(207.19968, 725.297)	16.5222
CPD-4663	1599694	1548276	2428692	2396259	1953895	1944129	2090042	2060672	3114120	3030517	2262910	2367710	3041637	2805200	2596052	2571227	2869631	2975056	2452942	2374854	2622698	2649314	1	2109538	2370260	2207796	1897875	1891152	2140658	2152033	CPD-4663	CPD-4663 [ C15 H24 O, tgt=69.83, overall=69.83 ]			(221.18784, 15101.732)(222.19096, 1013.4632)(203.17793, 86202.69)(204.18082, 11153.496)	10.6462
CPD-4662	1599694	1548276	2428692	2396259	1953895	1944129	2090042	2060672	3114120	3030517	2262910	2367710	3041637	2805200	2596052	2571227	2869631	2975056	2452942	2374854	2622698	2649314	1	2109538	2370260	2207796	1897875	1891152	2140658	2152033	CPD-4662	CPD-4662 [ C15 H24 O, tgt=69.83, overall=69.83 ]			(221.18784, 15101.732)(222.19096, 1013.4632)(203.17793, 86202.69)(204.18082, 11153.496)	10.6462
L-AZASERINE	116244	93326	110709	107705	100051	95060	173631	110082	110754	98745	111227	99937	193763	121562	110993	96083	110182	98670	176417	108552	97008	99528	107199	105635	157674	104880	95397	102570	115274	129233	L-AZASERINE	L-AZASERINE [ C5 H8 N3 O4, tgt=13.01, overall=13.01 ]			(174.05545, 4565.936)(156.04385, 4332.516)(177.068, 3981.425)(201.93536, 4675.6143)(202.0493, 398.91)	1.3934
CPD-14516	872718	1	1	1	1	1	1	1	1	1	1	1	1	1	1	1	1	1	359543	255517	1	1	212751	189948	359777	248657	261854	1	89351	86955	CPD-14516	CPD-14516 [ C8 H15 N O, tgt=30.32, overall=30.32 ]			(142.12123, 6230.249)(143.1242, 92.76)(146.09052, 6071.6743)	11.3468
3-METHYLXANTHINE	141102	132759	1	1	126062	130566	128566	97873	109967	105342	126350	117363	135472	95406	1	104086	1	1	159836	117745	117882	118518	119798	109321	163071	131270	1	1	105093	109044	3-METHYLXANTHINE	3-METHYLXANTHINE [ C6 H6 N4 O2, tgt=44.95, overall=44.95 ]			(152.05606, 15830.726)(185.0899, 309.6)(166.07106, 7413.1157)	2.06845
CPD-3944	434030	1	1	4281536	3666541	3637170	3435498	3346427	1	1	1	1	1	1	4048824	1	1	1	1	1	1	1	1	1	2597772	2465517	1	1	2796284	2759343	CPD-3944	CPD-3944 [ C17 H14 O6, tgt=72.49, overall=72.49 ]			(315.0826, 22606.8)(316.0856, 2505.1)(315.08405, 136409.52)(316.08667, 20296.934)(317.08902, 1524.8298)(337.06454, 6040.115)(338.06784, 1507.96)	12.391
CPD-3946	920874	869373	1163937	1180163	975339	1006569	941163	932533	1161784	1097888	1073472	1051195	1191819	1009023	980522	936948	857678	875652	1099390	1081285	1227775	1077569	1069804	949961	801104	784888	870400	856634	988933	942330	CPD-3946	CPD-3946 [ C28 H48 O2, tgt=50.98, overall=50.98 ]			(439.35135, 19773.805)(440.35437, 4560.386)	18.3594
CPD-3943	920874	869373	1163937	1180163	975339	1006569	941163	932533	1161784	1097888	1073472	1051195	1191819	1009023	980522	936948	857678	875652	1099390	1081285	1227775	1077569	1069804	949961	801104	784888	870400	856634	988933	942330	CPD-3943	CPD-3943 [ C28 H48 O2, tgt=50.98, overall=50.98 ]			(439.35135, 19773.805)(440.35437, 4560.386)	18.3594
M-TOPOLIN	99457	77501	91903	1	1	85641	154952	86193	99999	84531	96751	1	280807	287841	96549	83724	96006	85068	169461	90677	81744	86089	84260	91342	147364	96958	90736	1	95587	1	M-TOPOLIN	M-TOPOLIN [ C12 H13 N5 O, tgt=47.08, overall=47.08 ]			(243.10536, 7624.1855)(244.10669, 891.7065)(245.1042, 619.495)(266.1575, 5373.831)(248.08945, 16492.846)(249.09285, 481.065)	1.72846
CPD-14529	26310232	25668648	15390905	15114253	20672542	20584324	27935104	27159744	24269844	24003340	20463160	20956468	14315580	14061510	1	1	1	1	1	21310304	1	20307500	20394806	20911588	29553796	28120436	32424674	31498914	28178104	28188998	CPD-14529	CPD-14529 [ C10 H12 O2, tgt=60.98, overall=60.98 ]			(165.09036, 1077345.4)(166.09334, 98798.46)(167.09541, 6480.2573)	7.897
CPD-10707	9418384	9127765	10586392	10349023	9352854	9990194	9876181	9223315	10755192	10647791	672361	11351576	10702454	10895937	10495578	10241005	11195558	11425034	10564437	10450243	11992939	671106	8634457	7996269	10795789	10669489	8654749	8545914	10979255	10765805	CPD-10707	CPD-10707 [ C15 H24, tgt=67.89, overall=67.89 ]			(205.19395, 248927.34)(206.19664, 32715.732)(207.19968, 725.297)	16.5222
CPD-10708	9418384	9641537	10586392	10349023	9851416	9990194	9876181	9737779	10755192	10647791	672361	11351576	10702454	10895937	10495578	10241005	11195558	11425034	10564437	10450243	11992939	671106	8634457	7996269	10795789	10669489	8654749	8545914	10979255	10765805	CPD-10708	CPD-10708 [ C15 H24, tgt=67.89, overall=67.89 ]			(205.19395, 248927.34)(206.19664, 32715.732)(207.19968, 725.297)	16.5222
CPD-14502	595335	1	1	464671	493604	482214	516207	494280	468961	452990	477567	473342	484142	466800	368239	366198	1	482570	473802	456196	394550	409164	494871	471408	517649	501604	597522	616083	509747	1	CPD-14502	CPD-14502 [ C26 H40 O8, tgt=58.00, overall=58.00 ]			(466.25903, 1119.7025)(498.3074, 16032.574)(499.31018, 1293.2374)	15.6204
ADENINE-RING	4723896	4556559	3347715	3292000	3821387	3762546	5345744	4572599	3760712	3689729	3395502	3342839	5247616	4594259	3671000	3661665	4362169	4359005	4616307	3930553	3930453	3912260	3697213	3614811	4966644	4409124	3644118	3523409	3714735	3624520	ADENINE-RING	ADENINE-RING [ C5 H5 N5, tgt=79.13, overall=79.13 ]			(137.05444, 1400.645)(136.06186, 144222.27)(137.05966, 10547.825)	2.0968
L-ARGININO-SUCCINATE	147838	135943	162044	160069	148731	150791	130043	129969	162276	161568	1	152416	121275	134743	126874	122389	126325	126943	142000	146568	136572	133360	1	145155	96880	103502	112419	105585	160276	154018	L-ARGININO-SUCCINATE	L-ARGININO-SUCCINATE [ C10 H17 N4 O6, tgt=47.53, overall=47.53 ]			(273.10907, 3341.851)	5.5838
CPD-11293	2485485	2408762	1622452	1588333	1905372	1868371	3100258	3110177	1851950	1866086	2267381	2287362	3277392	3286335	2407422	2392220	2795730	2787367	3203234	3131742	3089939	3097448	2985307	2980676	3381742	3416861	3287523	3237515	2754313	2708168	CPD-11293	CPD-11293 [ C15 H25 O7 P2, tgt=93.17, overall=93.17 ]			(361.08743, 11313.916)(362.09045, 816.18524)(397.14276, 99265.5)(398.1454, 14463.832)(399.14682, 1183.373)	8.4081
CPD-14510	9418384	9641537	10586392	10349023	9851416	9990194	9876181	9737779	10755192	10647791	672361	11351576	10702454	10895937	10495578	10241005	11195558	11425034	10564437	10450243	11992939	671106	8634457	7996269	10795789	10669489	8654749	8545914	10979255	10765805	CPD-14510	CPD-14510 [ C15 H24, tgt=67.89, overall=67.89 ]			(205.19395, 248927.34)(206.19664, 32715.732)(207.19968, 725.297)	16.5222
CPD-14505	386141	380463	245242	243708	283199	279386	419676	189359	371492	367371	319498	323408	239352	218001	254343	250769	368111	374051	185821	163251	142053	126582	169062	153642	550837	337989	395553	382778	351866	337078	CPD-14505	CPD-14505 [ C32 H50 O13, tgt=59.84, overall=59.84 ]			(642.3384, 5435.203)(625.3276, 7466.64)(626.3306, 1735.96)(660.3594, 18087.121)(661.36127, 2744.0935)(643.3525, 4475.32)(644.3553, 577.46)(670.32776, 14750.33)(671.3309, 4955.891)	15.1406
CPD-14504	1	1	1	1	1	1	217334	1	1	132415	95670	154701	375350	288977	235150	247635	344485	347552	92036	88414	314524	315099	105868	112176	203030	112444	1	1	123727	130001	CPD-14504	CPD-14504 [ C38 H60 O18, tgt=25.44, overall=25.44 ]			(808.39343, 16972.385)(809.39606, 6259.0713)(810.3959, 895.1429)(808.3959, 7158.59)(809.3982, 2786.7)(810.3979, 640.92)(827.3568, 11621.096)(828.35925, 3699.2263)	10.1171
DEPHOSPHO-COA	125406	124768	228914	224692	168119	157864	374791	348903	259754	258557	271537	268310	375312	351277	424665	419148	490060	500341	431007	416194	399165	405548	373051	341241	353328	319939	202988	183603	380801	355025	DEPHOSPHO-COA	DEPHOSPHO-COA [ C21 H33 N7 O13 P2 S, tgt=2.31, overall=2.31 ]			(691.1263, 7773.397)(673.11554, 736.8271)(691.12683, 10976.539)(692.1297, 2125.2256)(709.1366, 10335.632)(710.1392, 2042.9961)(691.1245, 11419.628)(692.1269, 2646.2334)	9.1876
CPD-14508	595335	1	1	464671	493604	482214	516207	494280	468961	452990	477567	473342	484142	466800	368239	366198	1	482570	473802	456196	394550	409164	494871	471408	517649	501604	597522	616083	509747	1	CPD-14508	CPD-14508 [ C26 H40 O8, tgt=58.00, overall=58.00 ]			(466.25903, 1119.7025)(498.3074, 16032.574)(499.31018, 1293.2374)	15.6204
S-HYDROXYMETHYLGLUTATHIONE	219556	218479	1933648	211922	1664348	218952	254906	262625	1405490	1408292	229150	247725	262776	265142	251978	247956	223370	225469	1176808	1123854	1277711	1276136	913831	882878	1108572	260214	241771	233110	245348	963728	S-HYDROXYMETHYLGLUTATHIONE	S-HYDROXYMETHYLGLUTATHIONE [ C11 H18 N3 O7 S, tgt=66.89, overall=66.89 ]			(337.08417, 104.71)(338.09094, 448.72498)(341.66724, 5819.392)(325.08612, 378.8136)(355.856, 8556.847)(355.12192, 2171.82)(359.0717, 9465.041)(341.06137, 16030.258)(342.06467, 1204.9612)	7.99174
5-ALPHA-CHOLESTA-724-DIEN-3-BETA-OL	1	1	1	1	1	1	1	1	1	1	1	1	1	1	1	1	1	1	1	1	1	1	1	1	150285	147389	308813	301502	1	1	5-ALPHA-CHOLESTA-724-DIEN-3-BETA-OL	5-ALPHA-CHOLESTA-724-DIEN-3-BETA-OL [ C27 H44 O, tgt= ]			(366.33246, 11364.742)(367.33563, 1752.545)(412.3368, 1080.7576)	18.993
O-SINAPOYLGLUCAROLACTONE	3385687	3243690	3365027	3289487	3190250	3154693	3594218	3580503	2939592	2878465	3546205	2010728	3342725	3410533	3580272	3608623	2191639	3706128	3004242	2984811	2533414	2493041	3269850	3176984	2368682	2405923	2744691	2669274	3206806	3170177	O-SINAPOYLGLUCAROLACTONE	O-SINAPOYLGLUCAROLACTONE [ C17 H18 O11, tgt=47.29, overall=47.29 ]			(381.07556, 80290.97)(382.0782, 8513.41)(383.07544, 5615.52)(405.06854, 140.655)	1.4804
5-METHYL-THF	1	4874608	6016934	5979456	5284734	5199599	536217	573898	419862	416172	1	6026001	906993	913649	661459	689150	809726	787957	787188	838399	1035994	1002553	1	640002	267133	1	7004474	6668588	746945	740084	5-METHYL-THF	5-METHYL-THF [ C20 H23 N7 O6, tgt=68.31, overall=68.31 ]			(460.24234, 3977.4177)(460.1808, 285.79)(439.1521, 29287.79)(440.15472, 4233.8535)(459.1784, 17998.2)(460.1818, 1919.31)(441.16855, 15655.081)(442.17783, 3561.968)(476.2083, 13926.428)(477.21063, 2287.052)(457.20316, 189665.33)(458.2057, 37824.73)(459.1998, 8247.255)(481.16498, 6740.9897)(463.15222, 735.76)	7.21211
CPD-10734	625598	597423	692792	691930	626401	581439	1321281	1275049	1036127	1052810	1097868	1130089	1316527	1247546	1465482	1484894	1840788	1845765	1659304	1557454	1585329	1571200	1462899	1484916	1049708	990548	751025	734671	1194189	1203536	CPD-10734	CPD-10734 [ C9 H15 O9, tgt=47.61, overall=47.61 ]			(270.0796, 4802.9067)(249.05836, 37006.957)(250.06136, 1989.3131)(251.05347, 728.4475)(267.09518, 25943.81)(273.06088, 5047.6255)	8.2416
CPD0-1386	1	1631298	1590570	1	1	1	540530	1	1	368992	1	1	1	525828	1	429230	178323	279556	2175640	346507	1533182	1	1540432	1	862544	1976636	1602783	1	1	1	CPD0-1386	CPD0-1386 [ C4 H8 N2 O3 S, tgt=53.22, overall=53.22 ]			(147.02211, 15145.684)(187.06343, 4828.5425)(168.58195, 5089.3667)(169.05089, 202.9143)	3.14326
CPD-11230	1	493547	449916	471712	445145	466021	803894	782687	1334063	958536	1105250	855543	958542	624833	673550	1065934	834268	1276102	1377603	1366545	1664300	1693237	1237814	878688	1208962	1189503	1124224	875542	683926	680381	CPD-11230	CPD-11230 [ C21H18N3O3, tgt= ]			(365.11096, 34378.113)(366.11383, 5349.205)(367.1107, 1418.5991)	16.3978
CPD-11232	459403	423897	385808	377935	393133	396473	704779	652510	309975	306917	685728	649524	592472	583348	708387	701718	757301	814253	846221	761907	793633	804296	647835	648603	1017123	971495	110335	108120	626306	601442	CPD-11232	CPD-11232 [ C18 H28 N O4, tgt=16.37, overall=16.37 ]			(327.2244, 3435.4648)(309.2024, 1386.6274)(326.9179, 7584.239)(328.22888, 224.02332)(309.21768, 1092.212)(345.18607, 24211.986)(346.18735, 1792.4996)(331.18338, 7290.42)	16.6461
CPD-11884	3327977	3222116	3041895	3091301	3074012	3077658	2561913	2426004	2294405	2303601	2482917	2293085	2830313	2594521	2147126	2141208	1693450	1643284	2443867	2310635	2583147	2542173	2070231	1923990	2199389	1909631	1904689	1896765	2160668	2101615	CPD-11884	CPD-11884 [ C10 H9 O3, tgt=78.95, overall=78.95 ]			(177.05461, 42838.59)(178.05664, 2713.5522)(179.06825, 111.95286)(159.0425, 2093.818)(161.05804, 479.95358)(162.05357, 440.70886)(181.08401, 1836.4779)	5.4764
CPD-11233	572964	533419	288152	1	1	1	1646032	1586272	1696165	1678745	1403281	1384789	2073857	1957077	1634852	1636095	2268619	2293210	2173597	2170415	2111079	2092063	1739036	380252	2092995	1973874	1	1	1	508752	CPD-11233	CPD-11233 [ C17 H26 N O4, tgt=0.56, overall=0.56 ]			(309.25238, 4313.062)(310.2053, 380.38574)(291.5927, 19490.764)(292.1942, 3596.4402)(309.2039, 2172.55)(331.18405, 12664.671)(332.187, 1590.4746)	12.8162
ORCINOL-CPD	2891856	2835920	1459194	1485616	2122819	2231054	2542466	2725054	2494717	2568204	2256268	2064498	1432459	1605196	2247257	2285409	2177901	2175764	2112468	2319959	2276902	2257102	2209483	2197060	2780940	3002460	3300230	3294507	3010353	2727208	ORCINOL-CPD	ORCINOL-CPD [ C7 H8 O2, tgt=82.33, overall=82.33 ]			(124.051155, 73029.55)(125.05447, 4170.35)(107.045334, 7441.2017)(107.04629, 6273.7817)(147.04202, 1981.9766)	7.8958
CPD-11234	459403	423897	385808	377935	393133	396473	704779	652510	309975	306917	685728	649524	592472	583348	708387	701718	757301	814253	846221	761907	793633	804296	647835	648603	1017123	971495	1	1	626306	601442	CPD-11234	CPD-11234 [ C18 H28 N O4, tgt=16.37, overall=16.37 ]			(327.2244, 3435.4648)(309.20184, 265.335)(327.2262, 7851.0493)(328.22888, 224.02332)(309.21768, 1092.212)(345.1851, 25704.908)(346.18735, 1792.4996)(331.18243, 3114.5752)	16.7346
CPD-11235	533104	541800	1	1	327158	332053	366158	374503	520591	536114	387194	384278	1	1	216134	223173	1	1	385312	386401	354312	349813	395490	388547	478185	476407	621135	597694	383452	378114	CPD-11235	CPD-11235 [ C21 H26 N O4, tgt=30.07, overall=30.07 ]			(339.17374, 24321.984)(340.17682, 2525.1863)	9.43484
S-METHYLGLUTATHIONE	368009	334292	827348	832335	593573	575105	281633	257626	492192	519731	855017	631508	365526	327638	668874	591840	324223	270037	585624	567080	553775	1	539151	508225	274538	243083	1116176	1090853	466794	438710	S-METHYLGLUTATHIONE	S-METHYLGLUTATHIONE [ C11 H18 N3 O6 S, tgt=50.06, overall=50.06 ]			(324.81204, 4384.6553)(303.082, 17863.836)(304.08362, 643.215)(341.13394, 2961.033)(323.10742, 411.755)(343.14807, 20042.06)(344.42587, 2622.9502)(331.07758, 2767.183)	8.0236
CPD-11226	788318	771097	971755	943146	847766	852051	1191636	1124120	965621	970279	967216	978842	1182541	1123108	1214785	1235591	1301921	1305666	1252428	1184697	1166878	1141254	1089505	1078409	1169802	1079950	906594	903588	1171471	1150058	CPD-11226	CPD-11226 [ C12 H11 N2 O3, tgt=77.41, overall=77.41 ]			(231.0995, 40500.91)(232.10248, 4197.324)	9.1972
CPD0-1398	2277913	2216084	2321999	2322782	2215496	2195529	2548085	2495290	2133911	2159630	2784338	2710908	2288933	2375633	2606981	2584483	2785546	2762458	2527023	2522416	2704563	2729642	2213307	2222266	2167252	2162817	1945651	1969298	2835387	2833144	CPD0-1398	CPD0-1398 [ C5 H14 N8, tgt=27.49, overall=27.49 ]			(191.1398, 8053.6)(191.14062, 9411.271)(210.25346, 5872.679)(211.12953, 962.02844)	4.8794
CPD-11229	1	343173	337566	1790388	1	333168	293483	268534	275974	267015	857059	287484	1	263103	316452	316288	302924	307264	298994	1	1	1	1	1	239167	233828	1	224849	1	1	CPD-11229	CPD-11229 [ C19 H17 N2 O4, tgt=68.30, overall=68.30 ]			(343.14667, 1825.5901)(357.59448, 8203.107)(340.1562, 2703.44)(343.09952, 20344.213)(344.10397, 2442.8906)	4.69646
CPD-11228	141463	1	187812	179455	152440	150642	1	1	178471	178103	131891	130630	134803	1	1	129245	1	1	129226	1	1	1	127970	132238	130444	1	169028	162620	141379	147260	CPD-11228	CPD-11228 [ C15 H17 N2 O3 S, tgt=29.76, overall=29.76 ]			(305.08862, 7889.9385)(291.08093, 20878.883)(292.08395, 851.318)(325.1358, 22349.203)(326.13837, 3052.3813)(330.0919, 83128.6)(331.08975, 11527.836)(333.09158, 9079.744)	2.1652
CPD0-1396	876183	271554	1119941	1146700	963112	939343	1217442	1102076	1898847	1712940	281851	1023081	338296	1170685	1495109	1482266	1183565	1178162	881748	784068	683821	674230	301333	827783	868353	140962	186863	999007	919681	928990	CPD0-1396	CPD0-1396 [ C12 H18 N5 O3 S, tgt=45.86, overall=45.86 ]			(298.0947, 23134.26)(299.0965, 2680.79)(335.10617, 4738.007)(301.12164, 6159.51)(331.1473, 940.1088)(314.11517, 577.154)(317.36252, 12882.46)(318.1005, 410.9845)(314.93488, 4161.1143)	2.4432
D-TRYPTOPHAN	4017258	3652214	6904889	6733539	5080396	4961868	7187665	6205904	7476888	7493628	8168341	7670564	9063864	7988861	8991582	8671914	7198436	7206825	10599649	8992682	8399538	8402289	8886778	8566851	12635926	10819601	5385483	5079050	7797210	7706989	D-TRYPTOPHAN	D-TRYPTOPHAN [ C11 H12 N2 O2, tgt=86.22, overall=86.22 ]			(205.09608, 323903.06)(207.10007, 2693.1199)(223.13077, 7351.6553)(224.13304, 528.8375)(205.11938, 2460.0598)	4.2992
CPD-6901	1762854	1691091	1668991	1646785	1642169	1611585	1639735	1495636	1754321	1736768	1863353	1889273	1957455	1781566	1762688	1776244	1617633	1604351	2033084	1859773	1639654	1639218	1918573	1857272	2259751	2070671	1911840	1884397	1780323	1738082	CPD-6901	CPD-6901 [ C12 H17 N O3, tgt=67.37, overall=67.37 ]			(227.13673, 1840.8032)(227.13788, 2048.3298)(241.15259, 57361.42)(242.15543, 6182.5767)(226.15247, 2152.8271)(230.09982, 749.05273)	2.22
CPD-14544	3717645	3595722	4789240	4705264	4124657	4058436	2431275	2257008	4196933	4152108	3380696	3445063	2642035	2636968	3310965	3304562	2756078	2746617	2676770	2516980	2162269	2164622	2594485	2543189	3035657	2858119	2199533	2137716	2286307	2263490	CPD-14544	CPD-14544 [ C22 H25 N O6, tgt=63.02, overall=63.02 ]			(385.1779, 530.7413)(426.1134, 3547.0964)(426.1573, 2547.79)(404.15125, 150219.53)(405.15317, 25532.408)(406.1571, 4084.4192)	5.2428
CPD-11260	852732	774179	684156	213221	816991	828379	1129022	839965	988195	992550	751054	763704	1194405	846423	944491	950801	829365	846889	960130	702359	581779	562261	722755	695058	1034476	687826	808944	811179	733935	722874	CPD-11260	CPD-11260 [ C12 H17 O4, tgt=70.52, overall=70.52 ]			(207.1007, 971.6911)(227.1265, 221254.03)(228.12921, 23794.59)(229.13206, 1821.2286)(209.1159, 77907.72)(210.11873, 7486.1064)	4.9958
CPD0-889	2157927	2119418	1832860	1823623	2146202	2161040	1903997	1919778	1664905	1661618	1849035	1909552	2033830	1714360	1698862	1698874	1890727	1856365	1617563	1296542	1572949	1580007	1529746	1528990	1587678	1588088	1415384	1301944	2399197	2435426	CPD0-889	CPD0-889 [ C12 H12 N2 O5, tgt=82.75, overall=82.75 ]			(265.1043, 227.55333)(289.06558, 2428.1821)(271.05765, 23345.736)(272.06058, 2595.6724)	7.3246
CPD-20277	1667413	1638967	857824	2154589	1847304	1842411	1	2013203	817682	1180288	971702	985490	944435	1031399	818353	824511	1540787	1585049	2731027	2030524	2211797	2136911	3055808	864914	771985	842445	794006	786323	1622555	847619	CPD-20277	CPD-20277 [ C8 H15 N O3, tgt=67.28, overall=67.28 ]			(191.14137, 38182.324)(192.1445, 3310.755)(173.1308, 4420.251)(180.08504, 8840.809)(181.08723, 248.27444)	7.13934
CPD-13494	1	1	1	1	1	1	1	1	1	1	1	1	1	1	1	1	1	1	1	1	1	1	1	1	183901	164770	122811	123088	1	1	CPD-13494	CPD-13494 [ C17H26O4, tgt= ]			(276.1679, 7772.61)(300.19858, 4610.535)(304.1726, 364.68)	5.915
INDOLE_ACETATE_AUXIN	116244	93326	110709	107705	100051	95060	154727	110082	110754	98745	111227	109606	185194	121562	110993	90036	110182	98670	165878	108552	97008	99528	101844	105635	157674	104880	95397	102570	115274	123273	INDOLE_ACETATE_AUXIN	INDOLE_ACETATE_AUXIN [ C10 H8 N O2, tgt=47.53, overall=47.53 ]			(174.0555, 4541.2207)(156.04385, 4305.325)(177.06886, 4729.6475)(183.04903, 8549.173)(184.04895, 891.87494)	1.394
CPD-10759	9982493	9641537	10586392	10349023	9851416	9990194	9876181	9737779	10755192	10647791	672361	11351576	10702454	10895937	10495578	10241005	11195558	11425034	10564437	10450243	11992939	670861	8634457	7996269	10795789	10669489	8654749	8545914	10979255	10765805	CPD-10759	CPD-10759 [ C15 H26 O, tgt=67.89, overall=67.89 ]			(205.19395, 248927.34)(206.19664, 32715.732)(207.19968, 725.297)	16.5222
CPD-10758	9418384	9641537	10586392	10349023	9851416	9990194	9876181	9737779	10755192	10647791	672361	11351576	10702454	10895937	10495578	10241005	11195558	11425034	10564437	10450243	11992939	671106	8634457	7996269	10795789	10669489	8654749	8545914	10979255	10765805	CPD-10758	CPD-10758 [ C15 H24, tgt=67.89, overall=67.89 ]			(205.19395, 248927.34)(206.19664, 32715.732)(207.19968, 725.297)	16.5222
CPD0-1367	1	1	1	1	1	1	228865	227760	312748	306246	271553	273284	1	1	1	227175	284961	278740	322687	324933	352465	343046	285005	283012	497671	491079	333330	331126	245450	242802	CPD0-1367	CPD0-1367 [ C16 H16 O2, tgt=63.85, overall=63.85 ]			(263.10382, 14829.767)(264.10718, 1081.1338)	16.167
CPD-11259	459403	423897	385808	377935	393133	396473	704779	652510	309975	306917	685728	649524	592472	583348	708387	701718	757301	814253	846221	761907	793633	804296	647835	648603	1017123	971495	1	1	626306	601442	CPD-11259	CPD-11259 [ C18 H28 N O4, tgt=16.37, overall=16.37 ]			(327.2244, 3435.4648)(309.20184, 265.335)(327.2262, 7851.0493)(328.22888, 224.02332)(309.21768, 1092.212)(345.1851, 25704.908)(346.18735, 1792.4996)(331.18243, 3114.5752)	16.7346
CPD-11253	852732	774179	684156	213221	816991	828379	1129022	839965	988195	992550	751054	763704	1194405	846423	944491	950801	829365	846889	960130	702359	581779	562261	722755	695058	1034476	687826	808944	811179	733935	722874	CPD-11253	CPD-11253 [ C12 H17 O4, tgt=70.52, overall=70.52 ]			(207.1007, 971.6911)(227.1265, 221254.03)(228.12921, 23794.59)(229.13206, 1821.2286)(209.1159, 77907.72)(210.11873, 7486.1064)	4.9958
20A-20B-DIHYDROXY-CHOLESTEROL	1	1	1	1	1	1	1	1	1	1	1	1	1	1	1	1	1	1	1	1	1	1	1	1	141880	139939	1	1	1	1	20A-20B-DIHYDROXY-CHOLESTEROL	20A-20B-DIHYDROXY-CHOLESTEROL [ C27 H46 O3, tgt= ]			(402.35284, 2832.885)(442.34705, 4129.845)	18.597
CPD-20261	472584	712446	491639	486385	457331	744422	432767	413434	372166	387854	547624	407833	497034	335480	724136	527846	615980	613925	216841	217560	262847	260382	1	1	237723	196851	191738	192254	316251	299985	CPD-20261	CPD-20261 [ C12 H14 N2 O6 S, tgt=87.78, overall=87.78 ]			(332.08142, 18008.04)(333.08347, 1463.2017)(315.08377, 124508.08)(316.08636, 18349.693)(317.08847, 1417.9266)	11.8896
CPD-20262	472584	712446	491639	486385	457331	744422	432767	413434	372166	387854	547624	407833	497034	335480	724136	527846	615980	613925	216841	217560	262847	260382	295875	296023	237723	196851	191738	192254	316251	299985	CPD-20262	CPD-20262 [ C12 H14 N2 O6 S, tgt=87.78, overall=87.78 ]			(332.08142, 18008.04)(333.08347, 1463.2017)(317.0607, 11142.365)(315.08377, 124508.08)(316.08636, 18349.693)(317.08847, 1417.9266)	11.6101
CPD-20263	524565	503908	268368	309312	374541	388475	812080	1	596766	470668	1	1	680139	1	1	349310	1	1	1	631393	1	1	692861	689323	344950	240498	144825	142667	394548	1	CPD-20263	CPD-20263 [ C12 H11 N2 O5 S, tgt=56.24, overall=56.24 ]			(277.02914, 13130.181)(299.044, 158.08)(279.043, 1022.2077)(319.0741, 6166.965)(295.0592, 478.77)(303.01584, 6353.114)(304.24933, 271.67233)(305.01715, 435.042)	1.9366
CPD-20264	524565	503908	268368	309312	374541	388475	812080	1457162	596766	470668	1273460	1230269	680139	1156215	1436894	349310	1038270	1056445	1138096	631393	1024210	1028259	692861	689323	344950	240498	144825	142667	394548	1421541	CPD-20264	CPD-20264 [ C12 H11 N2 O5 S, tgt=56.24, overall=56.24 ]			(295.04218, 53390.816)(296.04495, 5840.155)(277.02914, 13130.181)(299.044, 158.08)(279.043, 1022.2077)(318.50192, 5603.681)(300.39963, 617.8866)(303.01584, 6353.114)(304.24933, 271.67233)(305.01715, 435.042)	3.9326
CPD0-1375	1	1	1	433419	414265	1	347864	337816	1	1	1	1	240398	226334	234421	244438	151816	147776	1	1	90001	95390	1	1	183949	173367	252653	251313	1	192002	CPD0-1375	CPD0-1375 [ C18 H33 N7 O3 S, tgt=37.59, overall=37.59 ]			(427.2264, 4525.991)(428.2558, 724.0)(445.28317, 5217.9644)(428.25656, 1160.4733)(450.22583, 6305.26)(436.4484, 34005.582)(437.21402, 6560.528)	7.70753
CPD0-1473	5343687	5177448	5324585	5270742	5030524	4964461	6094220	5721521	5890057	5757737	6052629	6044862	6094078	5695849	5915224	5796664	5501809	5541141	5578115	5268288	5932293	5851094	4400554	4333834	6166937	5793314	4239915	4244800	5238051	5168273	CPD0-1473	CPD0-1473 [ C29 H29 N9 O12, tgt=50.57, overall=50.57 ]			(679.1722, 241655.23)(680.17487, 82307.17)(681.175, 17004.826)(682.17535, 1406.27)	15.6758
CPD0-1472	142001	143057	111783	107719	117895	119947	735694	692016	378043	372046	1	1	717995	88719	153268	157795	118268	117415	516850	470741	105243	103712	402320	395865	525146	466800	579951	520775	105609	616615	CPD0-1472	CPD0-1472 [ C24 H27 N8 O9, tgt=21.39, overall=21.39 ]			(574.3611, 11391.21)(575.36395, 1548.5547)(576.1835, 11484.903)(577.1873, 1244.392)	8.07397
CPD0-1474	472935	453351	624867	620495	517668	516254	149143	156418	317733	304730	416910	391830	294950	313317	330247	331678	195030	210584	145215	178126	173338	1	1	136286	350744	339647	259212	235498	263219	238058	CPD0-1474	CPD0-1474 [ C25 H29 N8 O9, tgt=16.43, overall=16.43 ]			(609.86426, 1598.5269)(610.2185, 1696.445)(587.2019, 5760.0063)	9.40443
CPD-825	124907	121277	164363	194390	138653	152890	194753	180156	297471	294660	203244	178345	255675	248876	81997	87060	1	1	131891	206344	81744	89310	229668	210328	256948	1	264009	238168	122384	102209	CPD-825	CPD-825 [ C5 H12 N3 O, tgt=44.65, overall=44.65 ]			(133.13821, 69678.22)(133.86566, 4849.521)(114.0905, 449.755)(135.11531, 1715.9457)(149.13109, 5903.838)(135.07903, 6931.2207)	7.1126
GERANIAL	4958790	4746087	4649586	4597975	4558817	4568655	3623865	5695482	1700069	1674620	6252242	3718749	7495165	1767889	1808276	1772384	2413086	2390809	2883047	2451553	2513748	2522628	2139143	3712039	3960875	3643368	4765452	4782320	3880483	3915203	GERANIAL	GERANIAL [ C10 H16 O, tgt=67.47, overall=67.47 ]			(153.12624, 40689.8)(154.12909, 2935.8225)(135.1157, 28859.74)(136.11906, 1624.1328)(137.13104, 107.045)(175.1101, 6341.7407)	5.00607
CPD-15332	1	1	2594331	2606349	2451841	2454290	3647971	1	1	1	253583	2330894	1	1	1	258165	320660	343467	1	184558	184788	185493	160910	159700	3759766	1	2479740	2509810	1	2729777	CPD-15332	CPD-15332 [ C5 H4 N4 O3, tgt=42.74, overall=42.74 ]			(186.0652, 97617.4)(187.0645, 104441.03)(168.04994, 32703.23)(169.05144, 6041.528)(170.04784, 3972.644)(175.01598, 848.08997)	6.23189
CPD-17601	3894736	4502882	5585645	5321248	5236959	4652304	4261185	3453279	3850831	3262938	1839522	4237406	4490339	3569194	2791993	3545133	2537625	1977880	1261246	1169459	945571	942103	1288253	1274973	3867493	3755959	4272260	4010763	2938672	3169620	CPD-17601	CPD-17601 [ C21 H24 O6, tgt=61.85, overall=61.85 ]			(372.1613, 63923.21)(373.16394, 10150.027)(357.14923, 1410.2634)(357.15, 2122.147)(394.20233, 12463.134)(395.2047, 1327.336)(374.17648, 7002.478)(375.17966, 894.20483)(399.15726, 2323.8394)(379.4896, 10305.356)(380.1349, 1945.0764)	9.9664
CPD-17600	3894736	4502882	5585645	5321248	5236959	4652304	4261185	3453279	3850831	3262938	1839522	4237406	4490339	3569194	2791993	3545133	2537625	1977880	1261246	1169459	945571	942103	1288253	1274973	3867493	3755959	4272260	4010763	2938672	3169620	CPD-17600	CPD-17600 [ C21 H24 O6, tgt=61.85, overall=61.85 ]			(372.1613, 63923.21)(373.16394, 10150.027)(357.14923, 1410.2634)(357.15, 2122.147)(394.20233, 12463.134)(395.2047, 1327.336)(374.17648, 7002.478)(375.17966, 894.20483)(399.15726, 2323.8394)(379.4896, 10305.356)(380.1349, 1945.0764)	9.9664
CPD-9677	1011031	994914	1925209	983853	988097	977282	1109507	950592	974769	957409	897043	874231	934776	808454	909604	935616	972124	951409	1007540	893657	827013	825722	835400	821569	876902	795979	857390	859355	1078453	1056562	CPD-9677	CPD-9677 [ C29 H34 O12, tgt=67.32, overall=67.32 ]			(563.2038, 58926.367)(592.2343, 37332.79)(593.2369, 9437.48)(594.2396, 654.37)(579.25085, 2196.4082)(597.19, 54316.02)(598.1924, 13699.12)(599.1941, 1880.12)(579.18445, 24873.352)(580.38574, 3945.2034)(581.1817, 337.285)	5.9838
XANTHOSINE	1259456	1252862	1712974	1690787	1466859	1477026	2023663	1940532	2244843	2206796	2139532	2012486	2996713	2791148	2722314	2716593	3037827	3061035	3027160	2924539	2927911	3149937	3008060	2899663	1823809	1694147	1238446	1267172	2051534	2042647	XANTHOSINE	XANTHOSINE [ C10 H12 N4 O6, tgt=45.09, overall=45.09 ]			(284.09528, 112964.4)(285.09796, 9023.832)(286.09882, 800.3192)(289.04953, 1220.6357)	10.418
CPD-16870	1	2209819	1589010	1	2053562	2090417	2844474	2953541	1	1	2228901	852676	1	329070	255398	3367203	1092397	1139096	3379511	3527989	3753184	3741760	3196529	3113686	2770678	2806707	2173792	1663544	3112232	3103955	CPD-16870	CPD-16870 [ C20H19NO4, tgt= ]			(341.1323, 184.72)(319.12692, 1452.6321)(342.9466, 1027.442)(322.7384, 1391.604)(355.16882, 50907.082)(356.17178, 6431.253)(357.18335, 579.07495)(361.12094, 4270.755)(344.0689, 1491.5182)	5.11597
STERCULATE	1	1	1	1	1	1	1	1	1	1	1	1	1	1	265126	253261	1	1	311487	295445	284142	298571	261874	257312	249313	247612	1	1	1	1	STERCULATE	STERCULATE [ C19 H33 O2, tgt=35.52, overall=35.52 ]			(293.24365, 13101.049)(294.24692, 825.491)	18.1698
CPD1F-461	1	1	1	1	1	1	157049	161230	257217	250712	188497	171977	102124	175027	225471	237807	258437	274324	145716	148955	178200	182482	146065	143619	193036	215319	1	1	1	1	CPD1F-461	CPD1F-461 [ C21 H19 O10, tgt= ]			(437.1246, 11444.1)(435.12207, 274621.34)(436.12448, 46037.688)(437.12534, 7430.769)(449.1355, 11144.631)(450.13895, 1319.73)(432.86566, 73485.83)(435.37143, 283742.1)(436.12354, 61323.28)	9.63038
CPD-16876	524152	1	397139	381892	362684	394903	441270	423133	478553	514413	563958	482331	15713361	484437	515583	458470	11903444	360177	511470	13419593	501480	494210	544867	421627	15932105	534503	578961	366684	578775	370002	CPD-16876	CPD-16876 [ C5 H6 N O4, tgt=46.83, overall=46.83 ]			(127.0225, 16009.78)(146.424, 1668.6355)(127.02355, 154141.83)(128.02446, 592.1451)(129.0208, 191.17)(166.0714, 403.82162)(167.07059, 71.945)(148.05908, 4564.57)	1.7342
CPD-2483	987002	934025	999300	963419	914039	894230	1223520	1060913	1043328	1007404	1287761	1315477	1522245	1320763	1181523	1141565	1435433	1411471	1854504	1586289	1462377	1412204	1552262	1504008	1771526	1508252	1238383	1234476	1501145	1521332	CPD-2483	CPD-2483 [ C3 H7 N2 O2, tgt=30.89, overall=30.89 ]			(103.05313, 26711.697)(104.05752, 418.52603)(121.082985, 24558.893)(131.04805, 2461.64)	2.6998
TETRAHYDROPALMATINE	2485612	1817498	2099180	1662730	1689886	2186959	3174462	3254806	2761431	2098273	2465413	2444654	2921694	3695296	3696440	3720727	4894742	4925009	2861397	3910343	4189085	4157478	3536135	3467917	3045451	3061714	2347379	1816629	3426894	3409723	TETRAHYDROPALMATINE	TETRAHYDROPALMATINE [ C21 H25 N O4, tgt=45.27, overall=45.27 ]			(355.1689, 60269.516)(356.17184, 7828.313)(360.2093, 105.09)(380.18427, 726.454)(361.1596, 515.9463)	5.3484
D-THREONINE	734949	1	1425258	1	1258064	867962	1308491	991257	1965136	1922861	1	1381208	1	1806937	1	1	1	1	1	1	1	1	1	1	1558664	1	1	1060121	1200944	1	D-THREONINE	D-THREONINE [ C4 H9 N O3, tgt=57.17, overall=57.17 ]			(121.06398, 616.72614)(103.053604, 2844.75)(122.07152, 921.16693)(137.095, 28941.104)(138.09827, 1146.67)(119.08449, 3985.4285)(146.05879, 800.07996)	8.1238
D-GLT	191849	186504	150545	155643	167683	171224	185585	178701	163665	159431	167926	156769	183066	170765	172721	168168	186663	191800	146873	148742	144350	145276	137861	139927	175954	183196	166845	171703	187903	187679	D-GLT	D-GLT [ C5 H8 N O4, tgt=38.88, overall=38.88 ]			(131.048, 12338.637)(164.08075, 9018.198)	11.6144
CPD0-2060	117053	109229	108403	1	1	1	1	1	114722	116920	116091	116169	106532	1	1	1	1	1	1	1	1	1	1	1	116812	1	111882	1	1	1	CPD0-2060	CPD0-2060 [ C5 H8 N6, tgt=40.89, overall=40.89 ]			(153.08965, 6393.667)(177.06908, 7646.603)	4.0386
FUM	276130	256457	1	1	251975	257529	296809	258796	1	1	1	1	315731	278935	1	1	1	1	317366	277087	271966	279288	1	1	310096	274485	281995	1	1	1	FUM	FUM [ C4 H2 O4, tgt=29.48, overall=29.48 ]			(114.0156, 20848.924)(137.99026, 2030.1445)	1.3974
CPD-2461	705777	599614	499250	477735	499477	516059	782601	589437	342411	355833	437321	424648	946338	685565	555524	530981	595936	609930	852771	629242	502772	495884	626289	581432	930890	656629	601626	548588	703023	681579	CPD-2461	CPD-2461 [ C5 H6 O4, tgt=40.40, overall=40.40 ]			(148.0591, 10623.872)(130.04886, 9503.333)	1.984
CPD0-1437	1024982	1000999	1111695	1089398	1044649	1051841	708237	737664	599252	605047	1010986	1027674	803361	813862	937910	951414	795750	803177	659482	647401	800348	773400	545324	533707	765657	795688	539871	506454	1088872	1094587	CPD0-1437	CPD0-1437 [ O2 U, tgt=19.15, overall=19.15 ]			(272.05963, 3446.394)(271.05765, 42230.95)(272.06073, 4888.701)	7.528
CPD-15377	220364	222475	272973	266275	269975	226574	229156	206689	254144	246170	1	1	229618	181117	1	178060	1	1	250491	1	1	1	1	1	342717	257657	219478	195329	1	1	CPD-15377	CPD-15377 [ C5 H10 O5, tgt=43.80, overall=43.80 ]			(150.0539, 7047.5386)(151.0603, 144.185)(137.05736, 4852.0947)(137.05939, 5802.113)(168.0904, 738.69995)	2.3134
CPD-864	1069519	1050730	1285733	1275062	1145954	1155945	1705302	1522481	1317279	1321322	1322073	2032866	1582706	1501191	1628465	1639554	1736653	1746974	1654824	1595200	1581963	1542923	1470873	1452133	1558403	1	1235488	1207575	1576492	1540551	CPD-864	CPD-864 [ C10 H14 O2, tgt=84.27, overall=84.27 ]			(167.10515, 4736.965)(171.11555, 812.01)(149.09515, 44365.953)(150.09825, 2768.43)(151.11029, 143.025)(187.1459, 338.21002)(171.13666, 10086.28)(189.08942, 51357.83)(190.0923, 4905.9663)	8.92
CPD-15370	82532	75164	1	1	1	1	141403	121680	1	1	1	1	106160	104324	1	1	1	1	1	1	149018	154966	1	1	119005	109401	1	1	1	1	CPD-15370	CPD-15370 [ C41 H66 N7 O18 P3 S, tgt=11.56, overall=11.56 ]			(1074.2944, 5716.0947)(1075.294, 2729.9102)(1076.2904, 891.13995)	26.2798
CPD-14609	1326188	1268093	1461216	1571484	1323373	1317788	1455011	1327180	1736428	1732008	1316444	1284029	1611728	1476875	1303802	1291278	1105813	1103741	1244732	1130077	882967	883321	1303218	1267648	1463619	1308735	1417532	1410896	1168418	1149490	CPD-14609	CPD-14609 [ C8 H16 N O4, tgt=38.44, overall=38.44 ]			(191.40584, 14353.402)(192.41164, 1724.5222)(193.12029, 2112.4175)(173.09511, 739.4175)(193.1208, 1966.32)(208.1397, 55507.395)(190.12871, 5304.25)	5.0158
CPD-15374	1881516	1775169	1015623	1038205	1445338	1446910	2090213	1942997	1764508	1732692	1499740	1469236	1025401	961814	1310607	1268838	1385363	1374892	1673864	1563560	1470763	1476630	1517889	1524058	2227394	2009619	2323737	2291864	2013114	1978317	CPD-15374	CPD-15374 [ C6 H12 O6, tgt=75.37, overall=75.37 ]			(163.0586, 1073.2479)(180.08531, 77440.336)(181.08778, 4069.329)	7.8962
CPD-15373	1881516	1775169	1015623	1038205	1445338	1446910	2090213	1942997	1764508	1732692	1499740	1469236	1025401	961814	1310607	1268838	1385363	1374892	1673864	1563560	1470763	1476630	1517889	1524058	2227394	2009619	2323737	2291864	2013114	1978317	CPD-15373	CPD-15373 [ C6 H12 O6, tgt=75.37, overall=75.37 ]			(163.0586, 1073.2479)(180.08531, 77440.336)(181.08778, 4069.329)	7.8962
CPD1F-437	167515	160767	145666	152708	153423	138050	132269	1	1	1	168984	155836	1	152391	1	1	1	1	1	1	1	176329	107396	1	113760	121323	1	1	190870	190539	CPD1F-437	CPD1F-437 [ C21 H19 O12, tgt=36.18, overall=36.18 ]			(463.0828, 4288.9634)(449.10214, 6437.5107)(463.11227, 5114.1953)(492.10553, 1718.3624)	7.7536
CPD1F-431	712736	672335	1272400	1302117	1024647	990956	2466846	2283207	1	1	1	1	184360	807067	881406	901453	463713	455306	1	1	1	1	1604893	1573281	652217	601717	268654	217473	530390	520827	CPD1F-431	CPD1F-431 [ C33 H40 O20, tgt=39.98, overall=39.98 ]			(738.19214, 24221.523)(739.19666, 5893.715)(740.2, 862.1)(758.2125, 44063.31)(759.21295, 30464.725)(760.2112, 24035.715)(761.2104, 9548.077)(762.2105, 3932.28)	15.3598
INOSINE	18835888	17793252	13560385	13364968	15242061	15146020	21562420	17597904	13807107	13653867	12541659	12330997	20449500	17368660	14287210	14112200	17083828	16980480	16949168	14114077	13965548	2222457	2251047	2213032	18825882	15675896	13772702	13485651	14286428	14283451	INOSINE	INOSINE [ C10 H12 N4 O5, tgt=86.69, overall=86.69 ]			(271.0926, 2098.7634)(254.09007, 2204.6367)(286.11673, 113299.1)(287.11942, 16746.842)(288.1217, 444.265)(268.10257, 584699.7)(269.10464, 61119.87)(270.10596, 5726.096)(293.0666, 1873.46)(277.0642, 3649.4045)	3.1365
CPD-15382	1881516	1775169	1015623	1038205	1445338	1446910	2090213	1942997	1764508	1732692	1499740	1469236	1025401	961814	1310607	1268838	1385363	1374892	1673864	1563560	1470763	1476630	1517889	1524058	2227394	2009619	2323737	2291864	2013114	1978317	CPD-15382	CPD-15382 [ C6 H12 O6, tgt=75.37, overall=75.37 ]			(163.0586, 1073.2479)(180.08531, 77440.336)(181.08778, 4069.329)	7.8962
MYO-INOSITOL	1881516	1775169	1015623	1038205	1445338	1446910	2090213	1942997	1764508	1732692	1499740	1469236	1025401	961814	1310607	1268838	1385363	1374892	1673864	1563560	1470763	1476630	1517889	1524058	2227394	2009619	2323737	2291864	2013114	1978317	MYO-INOSITOL	MYO-INOSITOL [ C6 H12 O6, tgt=75.37, overall=75.37 ]			(163.0586, 1073.2479)(180.08531, 77440.336)(181.08778, 4069.329)	7.8962
CPD0-1422	570644	1566872	533113	554894	1300398	1347306	268446	437837	1777409	1693695	1696702	1661869	525471	524967	1309237	1288789	1303514	1065263	1850228	1	257285	249679	1629851	1542577	531925	544026	1257566	1213698	1491560	1475840	CPD0-1422	CPD0-1422 [ C35 H67 O8 P, tgt=70.35, overall=70.35 ]			(647.8862, 953.9872)(628.4561, 6804.3774)(653.4669, 656.25)(631.5427, 7498.862)(632.54517, 1974.9862)(664.50476, 6183.2803)(665.5072, 1009.41125)(646.4902, 14227.266)(647.49835, 7539.9277)(648.50055, 698.46387)(669.455, 4750.275)(670.4541, 1752.4375)(671.45667, 485.32)(651.45105, 10037.305)(652.4538, 3745.4365)(653.4593, 1060.67)	21.1915
MALTOTRIOSE	194051	205247	229038	230253	226679	237010	454986	483808	400922	391371	434734	438142	311896	329406	427223	436065	547841	545774	636160	636810	621162	619147	655864	635043	595518	623322	460234	451664	534851	541568	MALTOTRIOSE	MALTOTRIOSE [ C18 H32 O16, tgt=66.40, overall=66.40 ]			(511.18884, 155306.48)(527.16125, 23414.45)(528.16394, 4845.7246)(529.162, 1069.7086)	12.369
CPD1F-420	622460	553997	1	550734	549794	528727	556174	468857	508421	499985	713873	694131	633947	605756	1	623228	557624	536605	854603	750293	788600	777568	632390	1	911720	802578	511684	505806	651124	653408	CPD1F-420	CPD1F-420 [ C27 H30 O15, tgt=58.45, overall=58.45 ]			(595.1588, 15986.243)(596.16144, 3348.71)(577.1616, 1517.3134)	5.442
CPD-9693	108234	110403	123348	121541	115072	112841	119146	93501	115197	122457	129632	103931	110822	95270	144372	88588	164732	163907	125741	145119	151950	150505	137652	131984	126053	211618	149285	156257	170098	158103	CPD-9693	CPD-9693 [ C29 H32 O16, tgt=43.40, overall=43.40 ]			(638.17834, 7591.0596)(639.1821, 806.86)(638.1794, 7496.0586)(625.16724, 1284.4467)(657.19305, 46316.883)(658.1957, 10944.488)(659.20795, 43558.992)(660.2107, 10319.483)(640.01636, 4608.7153)(644.1527, 2141.69)	8.46753
CPD-9695	1858628	1748674	1605228	1622764	1660129	1622174	1883553	1860033	1500495	1481404	1420308	1451708	1626877	1571803	1766179	1748474	1790356	1831385	1710667	1710888	1724793	1737104	1522107	1492930	1802743	1748368	1693688	1695895	1951433	1936204	CPD-9695	CPD-9695 [ C30 H36 O16, tgt=22.55, overall=22.55 ]			(635.2094, 3570.1013)(659.20746, 42239.516)(652.2369, 22776.805)(653.2395, 5232.13)(675.1797, 10460.448)(676.18066, 5214.195)(677.1818, 902.9579)(657.19275, 44560.418)(658.1953, 10544.526)	6.4144
INDOLE-3-ACETYL-GLU	207998	1	269540	269976	241154	241655	415629	356042	290616	304598	334422	335842	432355	1	205725	209214	229642	1	339972	296494	287879	283139	273539	270069	387167	341445	1	1	1	1	INDOLE-3-ACETYL-GLU	INDOLE-3-ACETYL-GLU [ C15 H14 N2 O5, tgt=47.09, overall=47.09 ]			(303.0997, 3289.2656)(286.0885, 3440.38)(286.0984, 633.51)(321.12756, 9166.545)(322.13043, 1021.9775)(302.12106, 11693.327)(303.1251, 883.28)(329.34695, 46151.45)(330.1016, 8105.89)(307.0759, 8915.48)	5.42485
CPD-16173	100583	92272	99524	97021	91406	98010	125769	95098	97939	99284	88989	90732	124022	101807	99839	94144	90250	86920	120298	102914	99043	93736	94600	86742	143503	100578	103729	97097	91419	95999	CPD-16173	CPD-16173 [ C7 H5 N O, tgt=53.76, overall=53.76 ]			(101.02637, 7540.255)(139.07278, 1318.2839)(145.03348, 4059.4448)(127.023766, 960361.7)(128.02507, 156798.7)	1.3974
CPD1F-453	511238	488018	592348	597309	531869	520174	1032213	1086022	757746	755961	834634	833775	1057344	1102660	947311	940204	1295002	1307279	1204337	1245963	1152853	1124648	1251328	1218554	621722	633414	519684	511850	1053715	1040284	CPD1F-453	CPD1F-453 [ C21 H19 O11, tgt=44.93, overall=44.93 ]			(448.6918, 4370.059)(452.0968, 911.22675)(451.1002, 8992.669)(452.0975, 290.67)(465.13144, 46315.074)(466.13412, 7672.8296)(467.13535, 651.79645)	8.8664
LUTEOLIN-7-O-BETA-D-GLUCOSIDE	1584253	1495611	2060746	2057939	1742185	1736904	1330176	1220745	1129932	1128817	1673042	1703238	1652543	1592943	1686846	1685105	1312821	1331852	1294741	1205932	1483827	1451656	933053	909693	1189534	1100763	754382	720122	1470373	1453253	LUTEOLIN-7-O-BETA-D-GLUCOSIDE	LUTEOLIN-7-O-BETA-D-GLUCOSIDE [ C21 H20 O11, tgt=90.96, overall=90.96 ]			(449.10306, 65900.64)(450.10553, 11796.98)(451.10828, 1075.245)	6.7554
CPD-9699	730005	705311	1248363	1255315	953101	961573	1073251	1064319	1230266	1246901	1420616	1479219	1349783	1360491	1482298	1502292	1260450	1233723	1459326	1472676	1370272	1362184	1443707	1457370	1899234	1908809	955639	952582	1424672	1426266	CPD-9699	CPD-9699 [ C7 H11 N O2, tgt=78.13, overall=78.13 ]			(146.05899, 54610.2)(147.06169, 4318.0796)	4.2966
CPD0-1406	2753630	2494580	625348	2221574	2305582	2306045	4047904	3710530	4190751	4116240	3919659	3801765	3393769	3337053	4048251	3970893	4287930	4605013	2199908	4389272	4717831	4697890	3824884	3811258	3220318	2713584	4095318	4260733	3603826	3421318	CPD0-1406	CPD0-1406 [ C14 H25 N7 O3, tgt=92.54, overall=92.54 ]			(344.18253, 131426.03)(345.18512, 24488.402)(346.1873, 1604.3518)	16.7308
CPD0-1408	116244	93326	110709	107705	100051	95060	154727	110082	110754	98745	111227	109606	185194	121562	110993	90036	110182	98670	165878	108552	97008	99528	101844	105635	157674	104880	95397	102570	115274	123273	CPD0-1408	CPD0-1408 [ C8 H9 N O2, tgt=42.94, overall=42.94 ]			(139.0725, 1617.8267)(174.0555, 4541.2207)(156.04385, 4305.325)	1.394
CPD0-1401	336165	307049	297446	293965	295120	287091	335206	304236	328005	321520	288862	292028	342810	311805	270436	275253	221234	230275	255460	235373	194395	188568	163701	149314	315388	1	298851	290762	253577	247750	CPD0-1401	CPD0-1401 [ C11 H17 N8 O3, tgt=70.09, overall=70.09 ]			(311.3995, 2255.4316)(310.15036, 3955.7302)(312.1625, 1653.535)(332.1302, 12232.811)(333.1458, 1336.7355)	4.6966
CPD0-1402	1550335	1439494	1377074	1372096	1382579	1375110	1354492	1268524	1444564	1415471	1401899	1510899	1612315	1504710	1559979	1552927	1514469	1529216	1512033	1342496	1137044	1123252	1378179	1352609	1611899	1504954	1523580	1498084	1552690	1539029	CPD0-1402	CPD0-1402 [ C13 H23 N7 O3, tgt=71.60, overall=71.60 ]			(327.19742, 15355.7)(328.20038, 1432.097)(307.24323, 54527.273)(308.1685, 7079.691)(309.16394, 1217.1217)(327.19797, 21194.705)(328.2009, 2348.5894)(344.22446, 56522.805)(345.22705, 6770.473)(346.22888, 1022.5675)(328.21835, 496.46664)(349.1772, 7464.0254)(352.79037, 18432.213)(353.19168, 23615.725)	3.9982
CPD0-1403	2753630	2494580	625348	2221574	2305582	2306045	4047904	3710530	4190751	4116240	3919659	3801765	3393769	3337053	4048251	3970893	4287930	4605013	2199908	4389272	4717831	4697890	3824884	3811258	3220318	2713584	4095318	4260733	3603826	3421318	CPD0-1403	CPD0-1403 [ C14 H25 N7 O3, tgt=92.54, overall=92.54 ]			(344.18253, 131426.03)(345.18512, 24488.402)(346.1873, 1604.3518)	16.7308
CPD-15367	82532	75164	1	1	1	1	141403	121680	1	1	1	1	106160	104324	1	1	1	1	1	1	149018	154966	1	1	119005	109401	1	1	1	1	CPD-15367	CPD-15367 [ C41 H66 N7 O18 P3 S, tgt=11.56, overall=11.56 ]			(1074.2944, 5716.0947)(1075.294, 2729.9102)(1076.2904, 891.13995)	26.2798
CPD0-1404	1550335	1439494	1377074	1372096	1382579	1375110	1354492	1268524	1444564	1415471	1401899	1510899	1612315	1504710	1559979	1552927	1514469	1529216	1512033	1342496	1137044	1123252	1378179	1352609	1611899	1504954	1523580	1498084	1552690	1539029	CPD0-1404	CPD0-1404 [ C13 H23 N7 O3, tgt=71.60, overall=71.60 ]			(327.19742, 15355.7)(328.20038, 1432.097)(307.24323, 54527.273)(308.1685, 7079.691)(309.16394, 1217.1217)(327.19797, 21194.705)(328.2009, 2348.5894)(344.22446, 56522.805)(345.22705, 6770.473)(346.22888, 1022.5675)(328.21835, 496.46664)(349.1772, 7464.0254)(352.79037, 18432.213)(353.19168, 23615.725)	3.9982
CPD0-2099	353997	327257	1659091	1649884	280835	279861	704479	654067	1812173	1672550	1595679	1635955	2579664	1859597	1761036	1612368	1636777	1544677	2455261	1683767	1640256	1653741	1592148	1601679	2369480	1714370	1623598	1622498	1713169	1742272	CPD0-2099	CPD0-2099 [ C4 H10 O5 P, tgt=60.47, overall=60.47 ]			(157.03732, 1643.236)(187.06386, 122996.62)(188.06635, 8634.961)(189.0722, 362.075)(169.0504, 8888.626)(170.04956, 3825.5615)	2.0254
TROPINONE	1	1	1	1	1	1	1	1	109190	114493	127288	134437	123366	133298	131000	140834	1	1	138563	133529	125576	120773	128805	138385	170291	189682	1	1	122760	124393	TROPINONE	TROPINONE [ C8 H14 N O, tgt= ]			(127.110634, 6761.6484)(142.12129, 8558.524)(145.08282, 7191.1255)	4.297
5-O-METHYL-MYO-INOSITOL	1804273	1756778	1777697	1780351	1672570	1665418	1820890	1743977	1607817	1578584	1486828	1524752	1724724	1712911	1627264	1615012	781411	1610062	1690372	1616552	1579080	1549310	1508073	1499741	1913128	1856107	1791365	1772298	1750978	1716399	5-O-METHYL-MYO-INOSITOL	5-O-METHYL-MYO-INOSITOL [ C7 H14 O6, tgt=47.36, overall=47.36 ]			(177.06842, 8318.658)(181.08432, 158.68001)(220.89203, 109.87864)(221.0742, 196.55)(180.08517, 812.25336)(199.0945, 110.85)(199.05812, 2974.648)(197.1153, 104.89)	3.9874
3-BENZOYLOXYPROPYL-GLUCOSINOLATE	798025	826134	144023	138900	776746	766017	82803	906140	730966	739945	792534	143975	87239	954936	784614	145249	758239	774516	975454	917481	896961	870842	866510	826588	1015125	941890	883514	112329	784354	142887	3-BENZOYLOXYPROPYL-GLUCOSINOLATE	3-BENZOYLOXYPROPYL-GLUCOSINOLATE [ C17 H22 N O11 S2, tgt=37.84, overall=37.84 ]			(480.071, 2805.3975)(467.0551, 565.88904)(481.06778, 2355.8726)(467.056, 1582.04)(498.11005, 2966.9177)(480.64688, 5238.3555)(481.10107, 1460.5818)	7.1888
DESMOSTEROL-CPD	1	1	1	1	1	1	1	1	1	1	1	1	1	1	1	1	1	1	1	1	1	1	1	1	150285	147389	308813	301502	1	1	DESMOSTEROL-CPD	DESMOSTEROL-CPD [ C27 H44 O, tgt= ]			(366.33246, 11364.742)(367.33563, 1752.545)(412.3368, 1080.7576)	18.993
S-RETICULINE	158566	152948	145740	143349	148227	149566	230776	211324	294039	295309	228290	211447	300471	278588	250862	257393	302972	313225	255653	247026	255719	249345	273855	257051	263385	236667	235330	227589	182277	183360	S-RETICULINE	S-RETICULINE [ C19 H24 N O4, tgt=54.96, overall=54.96 ]			(331.1829, 11392.07)(331.18423, 11308.138)(332.18747, 426.59335)(333.20004, 42191.305)(334.20303, 5997.9146)	13.2134
CPD-13518	1867728	1582320	2346050	2322311	2059239	2032268	2275261	2146903	2667020	2667906	1407931	2104026	2489306	2339288	2197471	2208662	1963460	1987268	2611891	2560658	2246544	2272879	2009362	1947748	2195246	1791763	2083243	2089697	2009687	1937732	CPD-13518	CPD-13518 [ C6 H15 N4 O3, tgt=71.92, overall=71.92 ]			(193.12012, 1415.5856)(209.15039, 38941.39)(210.15439, 3358.4094)(191.14064, 10654.5205)	4.8314
CPD-19791	2088140	2032549	3638575	1	2846474	2783547	4648037	4503494	99536	97770	3770709	3717585	5531114	5473634	6182248	6123282	7238540	7143697	4268968	3930762	4161051	4173874	90208	3578750	3304301	3102578	2761299	2619263	3654242	1	CPD-19791	CPD-19791 [ C21 H29 O5, tgt=35.83, overall=35.83 ]			(387.19644, 45764.605)(388.19955, 7339.4634)(389.20312, 1748.4899)(366.1726, 185214.97)(367.17505, 28391.176)(368.17648, 3757.6157)	6.9807
CPD-8141	1	1	1	1	1	1	227819	1	328899	318400	276704	282586	1	1	1	1	289695	289599	341276	347465	372077	377353	297403	299156	547268	534702	355301	356288	1	1	CPD-8141	CPD-8141 [ C15 H10 O3, tgt=41.00, overall=41.00 ]			(221.0575, 2230.07)(239.06778, 15597.862)(240.0714, 790.7527)(241.0955, 1078.84)	16.1689
CPD-19790	462373	409670	1	1	155795	172873	1	161652	1	1	1	1	176870	178609	1	1	1	1	1	1	1	1	1	1	293655	271624	1	1	1	1	CPD-19790	CPD-19790 [ C26 H37 O4, tgt=28.28, overall=28.28 ]			(413.2612, 13407.151)(414.26416, 1571.6267)	22.0616
CPD-8144	1	198475	260838	247860	144948	145975	184676	158033	1	1	141807	134989	295666	238744	174372	171042	1	163900	148564	135411	106528	106741	160698	162696	146224	1	136608	135905	167746	1	CPD-8144	CPD-8144 [ C21 H20 O8, tgt=45.68, overall=45.68 ]			(403.13278, 1170.7999)(387.12305, 12740.525)(405.19376, 712.2694)(387.22873, 21114.842)(388.12546, 1889.0204)(405.14618, 1324.37)(427.11652, 665.9054)	4.003
CPD-8143	1	198475	260838	247860	144948	145975	184676	158033	1	1	141807	134989	295666	238744	174372	171042	1	163900	148564	135411	106528	106741	160698	162696	146224	1	136608	135905	167746	1	CPD-8143	CPD-8143 [ C21 H20 O8, tgt=45.68, overall=45.68 ]			(403.13278, 1170.7999)(387.12305, 12740.525)(405.19376, 712.2694)(387.22873, 21114.842)(388.12546, 1889.0204)(405.14618, 1324.37)(427.11652, 665.9054)	4.003
CPDQT-299	125977	1390698	1653868	1595151	1451567	98293	1169057	81389	78891	1693952	1	1896925	1271185	1142057	2000595	2037151	92995	138934	174888	1	1	1	1	1	1026030	914006	540968	663398	101329	1165434	CPDQT-299	CPDQT-299 [ C16 H30 N O10 S3, tgt=41.58, overall=41.58 ]			(496.43985, 3398.3516)(494.1096, 359.63)(476.69678, 7465.6514)(478.09958, 3591.2937)(493.81256, 3200.8574)(494.10895, 121.065)(476.24, 18653.178)(476.942, 3865.726)(513.13007, 4771.067)(493.13046, 3638.4534)	11.9084
CPD-8158	386844	454157	15356793	16415016	7136521	6168718	2397313	2267239	8079564	7945884	9566974	9741455	2404636	2247558	14350304	14428764	13645557	14009544	11926785	11736572	2551751	2477626	18815756	19109904	1512806	1	6809776	6619660	13341504	13548036	CPD-8158	CPD-8158 [ C42 H80 N O8 P, tgt=30.25, overall=30.25 ]			(763.5917, 3537.1426)(763.5922, 3108.125)(780.54614, 132192.83)(781.5491, 57397.285)(782.5513, 12393.617)(783.55365, 1742.2194)(764.53406, 960.3907)	25.7602
CYSTINE	573270	539894	310020	301516	396231	400229	562170	614854	380853	388013	83200	572378	687712	451819	331291	336599	370403	368836	661103	88805	387667	381470	440337	439574	290289	215227	1	1	314219	324329	CYSTINE	CYSTINE [ C6 H12 N2 O4 S2, tgt=47.39, overall=47.39 ]			(243.0155, 505.7767)(226.00903, 4197.68)(227.0142, 249.01)(263.0486, 1087.5771)(263.01385, 11826.178)(245.00255, 4605.385)	1.9364
DELTA1-PIPERIDEINE-2-6-DICARBOXYLATE	1758587	1569812	1628225	1634723	1584767	1568344	2280985	1615967	1782998	1650971	1558695	1628597	2544928	1852563	1738835	1609661	1604062	1526088	2441768	1667836	1631133	1633173	1556775	1553764	2355182	1709859	1603931	1598836	1425647	1751742	DELTA1-PIPERIDEINE-2-6-DICARBOXYLATE	DELTA1-PIPERIDEINE-2-6-DICARBOXYLATE [ C7 H7 N O4, tgt=56.53, overall=56.53 ]			(170.04752, 4010.5437)(153.23857, 1358.7174)(155.14182, 5337.417)(156.04382, 4173.05)(189.0722, 362.075)(175.01712, 8577.904)	1.3966
CPDQT-296	204475	207571	371074	244022	118049	120658	381165	358449	273909	251859	1	308926	375058	367960	412398	417451	468851	474293	403831	390209	397050	382732	368712	331596	358804	341145	263939	220859	400243	386166	CPDQT-296	CPDQT-296 [ C15 H28 N O9 S3, tgt=41.11, overall=41.11 ]			(462.7796, 11842.16)(463.09152, 1539.0281)(444.07935, 3414.6294)(467.08994, 1902.545)(451.09497, 88333.84)(452.0972, 14862.183)(481.79715, 28427.664)(465.12918, 669.8851)(467.0575, 403.68)	8.69233
CPD-8157	341060	360491	8488494	9474180	4276191	2620280	1014235	894570	2404953	1	8474207	8434549	940708	799687	2300377	9139170	9351919	9219946	2260741	3455289	2242467	922969	2270658	14679246	1083042	1022961	2367023	3798216	10966997	10821531	CPD-8157	CPD-8157 [ C42 H82 N O8 P, tgt=61.35, overall=61.35 ]			(760.36676, 18539.244)(761.5856, 9321.868)(762.58777, 1829.887)(760.5806, 26061.139)(761.583, 10843.453)(762.5882, 1003.00665)(782.70557, 53975.098)(783.5645, 28390.03)(784.5668, 5118.2207)	23.7542
CPD-9602	1584253	1495074	2059818	2057333	1742185	1736904	1327944	476329	466294	468256	353529	1703238	1651348	1592943	1686846	1686703	1311958	1331852	1295201	1205932	677890	671539	542230	494506	1189121	1100378	389794	382917	1473636	1451254	CPD-9602	CPD-9602 [ C20 H22 N2 O11, tgt=45.31, overall=45.31 ]			(449.36624, 62396.973)(450.10596, 12805.304)(451.10846, 1099.298)(451.1167, 5397.3984)(466.14908, 17505.152)(467.15363, 1558.9609)(491.11035, 1660.6599)(471.10468, 2602.3218)	5.77513
CPDQT-295	3123829	162108	1	1	1	1	6559901	5982170	4708548	4714391	5005167	4829903	6720556	6013359	6798143	6706559	7636719	7769169	7290116	6611791	6582206	6557400	6127636	5725165	6352060	5519212	4007466	3816917	6287823	6087363	CPDQT-295	CPDQT-295 [ C15 H28 N O10 S3, tgt=47.85, overall=47.85 ]			(463.0817, 533.7)(479.09802, 101902.82)(480.10013, 15879.807)(481.1011, 2391.271)(461.08737, 78776.51)(462.08972, 12368.187)(463.09128, 1464.1549)(498.1102, 4728.197)(499.11465, 14128.575)(500.11746, 2205.4695)(501.11557, 709.28296)(479.10025, 86543.88)(480.10156, 14312.888)(481.10254, 2014.3127)	9.12727
CPD-9603	202313	177572	220399	229947	203218	205241	173262	188894	3125811	2903643	243861	246567	152070	134828	189004	200239	114328	2549983	191828	152613	154349	175086	1	165901	122733	126642	152495	150742	194503	190338	CPD-9603	CPD-9603 [ C26 H32 N2 O16, tgt=31.01, overall=31.01 ]			(610.99036, 16574.998)(611.9928, 5466.4673)(646.1928, 8343.96)(647.1962, 1314.9434)(628.18567, 4621.666)(629.1871, 1602.1475)(630.18524, 624.845)	13.0351
CPD-9608	1	1	232385	238168	1	1	1	1	1	1	1	1	1	1	1	1	1	1	1	1	1	1	1	1	243792	1	1	1	1	1	CPD-9608	CPD-9608 [ C10 H5 O3, tgt= ]			(191.05206, 10208.819)(177.05878, 5200.2563)	4.846
CPD-13511	375726	355353	416197	415986	391166	386317	307000	329139	266999	272426	425010	417563	393242	406495	367866	365927	282780	290573	251592	242698	290032	279274	218386	216958	205312	207653	155071	151965	389310	384753	CPD-13511	CPD-13511 [ C16 H12 O7, tgt=70.72, overall=70.72 ]			(317.06207, 18411.777)(318.0652, 1744.9196)(301.06744, 7146.373)	7.6206
CPD-13509	167515	160767	145666	152708	153423	138050	132269	102234	1	1	168984	155836	79326	152391	82602	81574	89727	95141	91865	80126	82152	176329	107396	127309	113760	121323	1	1	190870	190539	CPD-13509	CPD-13509 [ C21 H19 O12, tgt=36.18, overall=36.18 ]			(463.08566, 3766.1338)(451.0948, 11053.905)(449.81952, 33935.7)(452.09708, 15628.183)(484.71582, 6546.2026)(484.64362, 3182.56)(485.1431, 1049.7)(463.5158, 7822.458)(466.1328, 12727.21)(467.1345, 757.42)(492.10553, 1718.3624)	8.26535
CPD-8155	541464	374758	75100376	78458960	53987388	41026656	6130552	5261167	104180944	96584328	114444640	113645936	3544553	2644065	99231976	96067360	125540112	121781456	61583332	51246504	3099268	2096857	70182672	72479560	7463442	6489831	100480496	96983320	131836560	135996176	CPD-8155	CPD-8155 [ C55 H74 N4 O5, tgt=44.88, overall=44.88 ]			(870.7224, 4872.5747)(872.5658, 11083.575)(873.5668, 3525.73)(871.5661, 402453.78)(872.56934, 241427.23)(873.5713, 65830.25)(874.57275, 12035.59)(875.5752, 408.60553)(893.5452, 19499.613)(894.54834, 10976.258)(895.5505, 2616.5542)	28.7622
5-PHOSPHORIBOSYL-N-FORMYLGLYCINEAMIDINE	1807933	1721370	2537950	2515293	2068395	2085818	2430617	2498491	3779867	3752673	2277479	1982491	1542586	1500870	2434144	2400888	1221290	1192569	13698087	13483937	2681743	13794605	2367317	2405275	1659826	1611042	1964969	1889477	1777792	1799137	5-PHOSPHORIBOSYL-N-FORMYLGLYCINEAMIDINE	5-PHOSPHORIBOSYL-N-FORMYLGLYCINEAMIDINE [ C8 H15 N3 O8 P, tgt=55.31, overall=55.31 ]			(315.28674, 7178.6387)(317.0621, 11906.808)(313.066, 946.01337)(295.0547, 75540.016)(296.05862, 10075.392)(330.09387, 128630.54)(331.0923, 16907.523)(332.10574, 3233.657)(314.08926, 5400.96)(317.0964, 3636.3435)(322.05182, 1362.2247)	5.7252
STRICTOSIDINE-AGLYCONE	897405	879968	840290	846441	862544	866408	1093000	1073912	964441	960226	1099595	1091540	1347475	1308860	992151	990557	838105	840849	1310444	1199272	1063367	1056468	1248178	1219213	1219182	1095652	997077	946434	996382	986938	STRICTOSIDINE-AGLYCONE	STRICTOSIDINE-AGLYCONE [ C21 H25 N2 O4, tgt=46.09, overall=46.09 ]			(354.18723, 12893.72)(355.18958, 1768.4017)(369.18988, 2738.336)(375.16028, 12559.832)(376.167, 4253.156)(377.17294, 399.55002)	8.4154
CPDQT-286	1	1	1	412533	1	1	586943	616767	492891	493691	510493	496951	473063	544081	574765	600886	694362	710762	599975	632870	663538	660912	593882	587326	477769	558697	1	496564	578259	582289	CPDQT-286	CPDQT-286 [ C13 H24 N O9 S3, tgt=48.78, overall=48.78 ]			(452.09695, 11521.727)(453.09457, 4709.811)	9.1625
CPD-8123	115136	120415	1	1	1	1	73521	80440	1	1	1	1	107273	136029	1	1	1	1	1	1	84933	78312	1	1	150942	158999	1	1	1	1	CPD-8123	CPD-8123 [ C10 H10 Mo N5 O8 P S2, tgt=47.51, overall=47.51 ]			(518.88306, 2809.265)(496.8697, 470.82)(505.8852, 10602.352)(507.8609, 1502.6123)(542.6987, 8649.627)(549.91187, 37666.016)(526.09534, 20280.797)(527.8988, 21294.58)	20.489
CPDQT-285	1140249	1115668	461498	641399	804655	1091916	187581	190604	1055350	1054865	1	1	1034213	1	1	1	1	1	136185	126928	150826	1	490276	102585	1096169	1	1	977385	1	1	CPDQT-285	CPDQT-285 [ C13 H25 N O6 S2, tgt=55.21, overall=55.21 ]			(359.1063, 19722.24)(360.1091, 2716.3)(340.2446, 4449.1045)(342.49942, 4919.728)(360.12518, 12643.055)(361.1283, 1072.48)(374.8123, 189565.17)(375.14307, 42564.5)(376.14423, 6437.5625)(355.13516, 13139.948)(356.13797, 505.75183)(379.76706, 46599.207)(380.09784, 9968.088)	7.9912
CPD-10037	563039	674393	676842	1	667656	656591	1895460	1947723	1971251	2536583	1956726	1	847782	530893	662858	679876	1	571930	1906947	1899341	1600143	921725	2023341	2004538	553539	1	1	1	683851	677154	CPD-10037	CPD-10037 [ C10 H14 O, tgt=68.22, overall=68.22 ]			(151.11, 1711.5492)(133.10011, 28018.438)(134.1034, 1225.9591)(155.1416, 2105.8738)	6.6504
CPD-17667	1848555	1767927	1317640	1300005	1497993	1460918	2181030	1772723	1317244	1294502	1165832	1160732	2087610	1702956	1359546	1371027	1676874	1671298	1674102	1351499	1355013	1349584	1282329	1217995	1905967	1561170	1311345	1291847	1411054	1376574	CPD-17667	CPD-17667 [ C17 H14 N2, tgt=65.27, overall=65.27 ]			(247.1266, 439.51)(266.15704, 743.725)(269.1045, 61845.83)(270.10583, 5798.6626)	2.1094
CPD-8122	519682	488948	153187	152340	1	1	423904	410890	1	1	1	1	614716	589658	1	1	111061	104009	1	1	466083	462093	1	1	697860	676091	1	90707	105390	105053	CPD-8122	CPD-8122 [ C20 H23 N10 O12 P2 S2, tgt=33.83, overall=33.83 ]			(748.02716, 6160.8716)(726.01434, 8446.564)(727.01733, 276.44666)	20.0862
LOGANIN	516288	485640	1	568959	521755	514395	773680	679891	574049	577021	615843	578492	777243	1	174487	173010	744571	215253	792512	1	714237	711606	1	654794	747470	643946	554296	548449	92098	678744	LOGANIN	LOGANIN [ C17 H26 O10, tgt=61.67, overall=61.67 ]			(410.18216, 2990.995)(393.18347, 17544.39)(394.18713, 1233.51)(416.15015, 3493.0383)(417.15417, 475.79)(395.1289, 26700.8)(396.13184, 3954.91)	8.9334
CPD-8138	1	1	1	1	1	1	227819	1	328899	318400	276704	282586	1	1	1	1	289695	289599	341276	347465	372077	377353	297403	299156	547268	534702	355301	356288	1	1	CPD-8138	CPD-8138 [ C15 H10 O3, tgt=41.00, overall=41.00 ]			(221.0575, 2230.07)(239.06778, 15597.862)(240.0714, 790.7527)(241.0955, 1078.84)	16.1689
CPDQT-277	1	1	1	1	1	1	1	1	1	1	1	1	1	1	1	1	1	1	150577	1	1	1	140607	133877	169422	1	1	1	1	1	CPDQT-277	CPDQT-277 [ C11 H23 N O2 S, tgt=25.97, overall=25.97 ]			(233.14667, 7508.54)(219.1308, 1631.63)	2.59437
DIPYRROMETHANE	1856882	1800725	2585811	2595124	2192185	2158792	2391375	2358977	2270262	2258372	2503738	2561896	3348011	3194115	3936088	3941306	3822683	3796413	3011219	2884717	2954535	2913616	2694673	2695521	2945986	2773007	1846068	1803939	2735399	2700972	DIPYRROMETHANE	DIPYRROMETHANE [ C20 H20 N2 O8, tgt=54.96, overall=54.96 ]			(416.151, 125827.53)(417.15338, 20826.9)(418.15497, 2615.857)(421.1055, 29356.633)(422.10822, 4066.5986)	8.7632
CPD-17650	115954	132646	2727858	2779325	2026882	1946735	1387866	1407940	2210451	448719	2127562	2104468	1237460	352153	2385392	2383993	2231948	2305294	1858349	1911000	363105	358482	660352	2101430	1463034	1508288	2411241	2319052	2598030	2521573	CPD-17650	CPD-17650 [ C40 H56 O, tgt=59.84, overall=59.84 ]			(534.43445, 15512.007)(535.4409, 3072.7703)(571.8009, 33865.664)(572.8712, 14085.81)(573.5559, 3973.443)(574.5885, 443.26526)	24.2979
CPD-18334	757077	670200	397898	410430	383286	498994	912860	571370	258091	340230	243401	831126	1176259	713202	266388	856879	446401	328842	1253013	326281	356718	366975	205545	324196	739556	1039700	208563	450056	322637	351419	CPD-18334	CPD-18334 [ C11 H5 O4, tgt=75.31, overall=75.31 ]			(185.01422, 882.326)(220.05928, 676.82947)(201.04248, 29665.732)(202.0469, 1608.7529)	1.3934
CPD-17652	1148820	1095530	1	1	1	1	169823	1	820169	822306	1044831	986956	1	1248519	1	1	1	1	1	587089	148080	144831	712690	705302	1507638	1445132	1	1	1	1	CPD-17652	CPD-17652 [ C40 H54 O2, tgt=59.06, overall=59.06 ]			(568.6833, 18331.176)(570.03864, 6703.908)(570.17676, 1886.7823)(570.4283, 370.33)(549.4102, 55210.37)(550.4126, 10282.94)(569.41724, 35310.066)(572.4262, 13795.07)(550.84393, 51318.273)(551.8467, 16602.125)(553.42303, 3187.8713)(588.80194, 8579.204)(590.47705, 4167.1787)(595.2355, 6257.594)(595.4341, 2611.95)(576.1601, 1467.1835)	21.274
CPD-17651	1148820	1095530	798355	762367	333091	517685	169823	1	820169	822306	1044831	986956	144395	1248519	827708	807963	854906	845389	1	587089	148080	144831	712690	705302	1507638	1445132	800379	266900	1028276	829597	CPD-17651	CPD-17651 [ C40 H54 O2, tgt=59.06, overall=59.06 ]			(568.5612, 16666.55)(569.7315, 6304.404)(570.3513, 766.31537)(570.4283, 370.33)(549.4102, 55210.37)(550.4126, 10282.94)(569.41724, 35310.066)(572.4262, 13795.07)(551.121, 58088.965)(552.1238, 20291.836)(553.424, 3181.8948)(589.11475, 10058.167)(590.478, 3838.2678)(595.2355, 6257.594)(595.4341, 2611.95)(576.5299, 1138.7819)	22.1905
CPD-8131	834426	773296	1329730	1311935	1011349	1017914	1128265	1138121	1321595	1327264	1640822	1546517	1416230	1534326	1646750	1615338	1326809	1295584	1589765	1649537	1537815	1508482	1632285	1618393	1934566	2000444	1042901	1012231	1506272	1475058	CPD-8131	CPD-8131 [ C10 H8 O, tgt=71.37, overall=71.37 ]			(146.0962, 52038.527)(147.06177, 4225.6113)(130.06343, 6821.7305)(130.06407, 5938.9634)(144.07964, 58883.867)(145.08296, 4977.239)(169.25006, 6914.3813)(170.23154, 16482.21)(171.06195, 1011.9979)	4.2966
ISOVALERATE	2246709	2162381	1251934	1227351	1707755	1681305	2140193	2250716	1980126	1943990	1713822	1669465	1107838	1104521	1549516	1549002	1580950	1578309	1764284	1734746	1719781	1681961	1750757	1747157	2381174	2398125	2760031	2652815	2361954	2353132	ISOVALERATE	ISOVALERATE [ C5 H9 O2, tgt=85.98, overall=85.98 ]			(105.069305, 84861.336)(106.07248, 5529.916)(121.10011, 482.81848)(124.05116, 88398.51)(125.05447, 5114.257)(107.04496, 6866.526)	7.8946
CPD-12402	588491	311610	330005	330699	882575	797500	360484	247605	1	310497	369270	309301	962907	426420	840365	296742	1622903	1633841	1127924	527039	646437	578207	683865	615202	790113	393691	1682151	1	1198311	1201570	CPD-12402	CPD-12402 [ C19 H33 N4 O7 S2, tgt=45.85, overall=45.85 ]			(495.9302, 4486.248)(497.0882, 723.22003)(497.168, 5720.16)(475.7184, 1515.8245)(496.51547, 3481.1804)(497.1859, 359.95)(476.80316, 635.39)(515.0242, 12969.351)(512.20624, 7909.6313)(513.2091, 714.218)(493.2039, 2304.9106)(494.2053, 225.07)(498.15927, 657.9284)	8.96747
CPD-9638	16087157	15339181	25055012	25150950	21025118	20968420	15425349	14005080	18818636	18802768	21250084	21003828	17158930	15591298	21271660	21220174	14614746	14483911	19138796	17764480	18504760	18198924	15739437	15650566	14670506	13410143	9374733	9182959	18430044	18460312	CPD-9638	CPD-9638 [ C9 H9 O4, tgt=93.85, overall=93.85 ]			(181.04787, 9295.271)(163.03828, 520105.56)(164.04105, 41909.688)(165.04315, 2570.0713)	8.4534
CPD-12400	551240	550717	1	1	1	1	143216	155219	1	1	1	91217	203639	220334	188642	199046	383927	390441	218375	166954	189119	182878	189932	182690	547254	615139	1	729167	127283	131450	CPD-12400	CPD-12400 [ C13 H25 N3 O4 S2, tgt=12.18, overall=12.18 ]			(351.1197, 30060.494)(352.1227, 1485.9021)(351.9787, 13248.778)(353.15866, 1643.6877)(357.46384, 10611.337)(360.11044, 5790.0703)	7.46748
CPD-9639	3021283	2870692	3023152	2976857	2883485	2887730	2162501	2104078	1	2079175	1	2641213	2288729	2182461	2504734	1	2244092	2242575	1	1	1	1	1	1	2117164	1978199	1904724	1870025	2369300	2327362	CPD-9639	CPD-9639 [ C18 H16 O8, tgt=65.59, overall=65.59 ]			(361.0887, 102744.68)(362.09125, 15921.548)(363.09344, 1094.4678)(365.1125, 403.428)(383.06937, 3973.2478)	11.6658
CPD-9632	37694676	36923940	35189084	34845144	35253428	35104672	30158942	29553420	30350100	29882952	36143432	36247292	32298576	31864508	32059128	31838012	31855546	31542936	27100996	26494452	27380542	26708800	24803048	24960996	30984630	30214738	27920592	27731912	32786908	32370890	CPD-9632	CPD-9632 [ C18 H16 O7, tgt=76.66, overall=76.66 ]			(345.09433, 1028710.6)(346.09744, 181559.3)(347.09912, 23705.725)(348.101, 1022.4571)(365.6016, 817.1944)(367.07538, 132250.84)(368.9967, 4024.6887)(369.08105, 2693.755)	13.9696
CPD-9633	3021283	2870692	3023152	2976857	2883485	2887730	2162501	2104078	1	2079175	1	2641213	2288729	2182461	2504734	1	2244092	2242575	1	1	1	1	1	1	2117164	1978199	1904724	1870025	2369300	2327362	CPD-9633	CPD-9633 [ C18 H16 O8, tgt=65.59, overall=65.59 ]			(361.0887, 102744.68)(362.09125, 15921.548)(363.09344, 1094.4678)(365.1125, 403.428)(383.06937, 3973.2478)	11.6658
CPD-9630	3059184	3017197	1	1	1	1	1	257257	3620014	3609819	4100908	3996851	2371737	1	4045632	3929562	2667198	2730694	2570464	1	2588383	2557303	2372935	2234197	286436	269402	1	281749	2764049	1	CPD-9630	CPD-9630 [ C16 H11 O7, tgt=37.97, overall=37.97 ]			(333.08292, 1594.5748)(315.79935, 44753.92)(316.46164, 7815.6274)(317.08755, 962.15826)	11.8344
CPD-9631	610973	593903	650838	641235	634550	641660	523885	525751	479499	555254	81598224	567885	551653	556786	605164	529552	574824	585566	529728	458817	442482	71361288	65342012	66889664	566988	461440	501271	424331	506184	505700	CPD-9631	CPD-9631 [ C17 H13 O7, tgt=55.98, overall=55.98 ]			(347.0993, 26344.969)(348.1012, 1141.8335)(329.0985, 1970978.6)(330.10187, 360446.2)(331.1034, 45107.555)(332.1054, 3109.0225)	14.1916
CPD-9635	7474095	8025056	8859121	8942185	12076229	11386495	10238292	10451679	5879291	5612622	5182265	4994310	10932018	12230356	7214373	6899537	6241106	6122402	10986853	11142521	11231879	11640475	7642187	7152446	12527154	13069256	5659352	5281644	4725246	4457509	CPD-9635	CPD-9635 [ C35 H52 O4, tgt=83.90, overall=83.90 ]			(564.40295, 425.58713)(537.3893, 132821.17)(538.3918, 38135.625)(539.3904, 7394.3755)(540.3902, 796.16003)	25.0788
CPD-19751	87804	80412	1	1	1	1	86577	1	1	79018	1	1	98560	86037	1	76898	1	1	84035	1	84901	79568	1	1	96284	83016	78661	1	89267	1	CPD-19751	CPD-19751 [ C6 H5 N O, tgt=10.21, overall=10.21 ]			(111.0438, 2734.19)(128.07483, 4647.7485)(130.02347, 6414.458)	1.3978
CPD-19753	331061	317700	389973	393687	348974	356461	468226	455251	393744	399141	388157	395957	464328	459841	474834	490584	502866	514726	491577	477315	466705	462113	437015	428002	115623	106539	366741	377594	471086	450340	CPD-19753	CPD-19753 [ C8 H13 O8, tgt=39.12, overall=39.12 ]			(221.0575, 2885.97)(255.09871, 17808.398)(256.10205, 1007.2238)(239.0683, 24927.09)(240.07184, 2592.98)(241.0955, 1396.15)	9.66253
CPD-17644	286165	270990	1778143	1713072	1121356	1147302	320843	324040	708481	705322	1324431	1331699	300989	294236	736720	718012	707673	717623	988416	960848	266067	257526	595301	574543	261589	253532	777046	764123	1140231	1120415	CPD-17644	CPD-17644 [ C18 H36 O2, tgt=33.98, overall=33.98 ]			(284.29187, 25165.76)(285.29483, 2934.2312)(286.305, 650.81995)	20.4274
DICOUMAROL	493706	466754	390299	395218	438146	428854	419575	399768	353260	349704	425701	420633	396536	377601	377548	394142	364935	375887	132513	252062	332262	97733	1	115581	322713	304414	310147	318559	381741	385478	DICOUMAROL	DICOUMAROL [ C19 H12 O6, tgt=53.14, overall=53.14 ]			(323.06946, 1549.7424)(337.0646, 18135.777)(338.0677, 1474.7247)(337.0837, 7114.51)	11.6851
CPD-17645	112200	101856	1710497	113582	2136648	104411	3136613	3036724	4111853	4099117	3667219	3587644	2796424	2702725	3104116	3068654	4765307	3634799	4404106	4296481	4575704	4570660	3859638	3883000	6411080	6186593	4216033	4226297	382381	385436	CPD-17645	CPD-17645 [ C18 H27 O5, tgt=47.41, overall=47.41 ]			(324.64383, 2458.5857)(328.15958, 119714.61)(329.1608, 21563.639)(330.1632, 512.07996)	15.4072
CPD-17642	546746	507296	481456	478664	479467	478764	565332	495930	427333	1	1	1	553028	478493	1	422721	413635	1	1	1	464484	1	1	395814	520929	467266	443189	440375	412574	1	CPD-17642	CPD-17642 [ C16 H34 O2, tgt=35.35, overall=35.35 ]			(258.27655, 12484.466)(259.27972, 378.348)	17.2854
CPD-19759	466964	433403	439135	462518	444255	432755	623428	609349	1	542899	1	735939	636472	665302	586492	598952	661193	658604	765916	682756	695549	695530	648151	637097	723498	654770	635105	586066	753241	751986	CPD-19759	CPD-19759 [ C35 H32 Mg N4 O7, tgt=55.57, overall=55.57 ]			(644.21063, 14817.28)(645.2139, 3501.7747)(628.2084, 1705.0234)(628.2091, 3391.755)	8.2664
CPD-10081	455223	244752	246305	252282	250589	245153	334135	270775	203043	218889	203255	560948	255918	563212	362724	362513	1	1	335187	248956	257257	237438	224998	222118	238464	175351	199712	194163	250299	249024	CPD-10081	CPD-10081 [ C26 H25 O13, tgt=22.53, overall=22.53 ]			(547.1493, 14250.0)(548.1523, 2383.9001)(549.1519, 321.24)(547.1516, 14439.9)(548.1544, 2322.0745)(551.0965, 23985.05)(552.0992, 4469.641)	6.23429
CPD-9642	6188998	5997628	6283553	6247706	6117369	6132330	6273594	6318633	6483529	6480451	1	6578275	6168380	6235905	6467743	6451203	6070459	6108317	5846739	5915314	6728252	1	1	5159802	6483380	6592333	5047237	4912733	6060145	5982199	CPD-9642	CPD-9642 [ C16 H18 N O9, tgt=48.75, overall=48.75 ]			(351.081, 170489.03)(352.08356, 26640.059)(353.0855, 2450.3667)(391.1346, 155.42)	15.6856
CPD-8117	2767212	2683871	2507180	2543271	2525218	2558216	4196150	4157792	4686344	4726246	3360686	3387748	4850746	4847425	4443341	4394220	4860965	4899862	4613057	4642234	4074549	4022273	4837374	413236	3919450	3817541	3866396	3833060	3325258	3352126	CPD-8117	CPD-8117 [ C18 H29 O2, tgt=74.20, overall=74.20 ]			(277.21408, 143823.6)(278.21683, 23026.518)(279.2259, 3446.5388)(261.21915, 13979.344)(262.22202, 2175.9722)(279.2279, 1246.03)(261.21814, 30544.775)(262.22104, 4475.89)(264.2287, 1057.16)	15.426
BIOTIN	99457	1	91903	1	1	1	135023	1	93911	1	90789	89440	161502	95827	96549	78513	96006	1	161546	90677	1	1	1	1	147364	96958	85432	1	95587	98527	BIOTIN	BIOTIN [ C10 H15 N2 O3 S, tgt=67.96, overall=67.96 ]			(243.10564, 8223.754)(244.10677, 886.68506)(245.1042, 619.495)	1.384
CPD-15300	5381166	5218910	5367298	5316137	5073808	5012380	6205885	5815839	5989336	5853323	6150599	6143557	6195444	5772047	5995995	5878255	5576036	5625293	5690250	5364147	6040708	5952423	4483937	4413902	6266216	5876656	4287737	4294818	5307887	5231858	CPD-15300	CPD-15300 [ C33 H31 N2 O15, tgt=78.29, overall=78.29 ]			(679.1722, 242697.19)(680.17487, 82660.85)(681.1749, 17056.02)(682.1737, 1349.3566)	15.6758
CPD-17638	1669918	1597162	1034608	1038375	1201589	1278501	1468874	1430494	879195	864112	746079	721451	1443100	1437088	845436	849463	680227	704653	1146547	1133368	1386352	1424247	901067	873956	1555605	1519361	1023393	1021477	697090	672733	CPD-17638	CPD-17638 [ C33 H54 N7 O18 P3 S, tgt=22.03, overall=22.03 ]			(980.2681, 30952.77)(981.2689, 29472.223)(982.26746, 27201.686)(983.2665, 14179.379)(984.2648, 6121.1104)(985.2629, 1700.6014)	28.5696
CPD-12403	977982	877421	726247	727278	826896	272387	929721	330578	1097906	1121076	286814	431348	1202419	1187408	967861	953898	981794	954842	295360	982697	227055	237923	1271723	1024009	401309	382334	327555	872785	395501	374514	CPD-12403	CPD-12403 [ C14 H27 N3 O4 S2, tgt=63.34, overall=63.34 ]			(365.1541, 3053.4646)(347.1429, 1089.8667)(384.18073, 1333.01)(366.17264, 90442.93)(367.1752, 12054.645)(368.17645, 1795.6812)(390.87674, 913.61)(391.14456, 800.98)(371.1275, 20644.574)(372.13, 2630.064)(373.13162, 457.79498)	6.733
CPD-12404	1	1	1	1	1	1	1	1	1	1	1	1	1	1	1	1	1	1	1	1	1	1	1	1	89581	1	1	1	1	1	CPD-12404	CPD-12404 [ C10 H21 N O2 S, tgt= ]			(202.1168, 6309.86)(204.1219, 378.02)(247.1266, 753.44)	2.039
S-ADENOSYL-4-METHYLTHIO-2-OXOBUTANOATE	1201193	1145485	1401552	1412991	1272628	1262606	1215292	1250100	1547703	1541238	1145716	1161971	1554448	1642160	1593569	1555386	1478145	1503366	1333813	1393370	1487918	1484222	1293462	1256540	1458809	1477853	1406165	1359809	1303013	1302627	S-ADENOSYL-4-METHYLTHIO-2-OXOBUTANOATE	S-ADENOSYL-4-METHYLTHIO-2-OXOBUTANOATE [ C15 H19 N5 O6 S, tgt=70.05, overall=70.05 ]			(401.11136, 1312.121)(379.0959, 61450.184)(380.09863, 8469.634)(381.0993, 297.34)(401.1108, 3464.79)(419.94318, 2233.5728)	6.2504
CPD-12405	1	660400	740009	753673	686675	666190	1352099	1	1270866	2599564	1394146	1363124	1011102	962210	1	1545629	1910636	1929793	2510566	2466431	2370041	2336337	1994745	1934995	2467912	550429	1548113	1494451	1925901	1929886	CPD-12405	CPD-12405 [ C20H35N4O7S2, tgt= ]			(511.18906, 150133.6)(512.19135, 35050.465)(513.1918, 5374.0854)(492.20148, 23514.475)(493.204, 4144.462)(526.22217, 104695.84)(527.2244, 24495.91)(528.2259, 3603.2222)(509.06372, 2766.76)(531.17676, 29683.932)(532.17957, 6530.8057)	11.2369
CPD-9618	423349	418113	423378	414597	411231	408043	351409	354568	432141	427358	452473	479446	393734	393217	431262	434906	392291	392022	330581	511547	360848	359362	1	1	419959	399788	336849	344051	435201	437198	CPD-9618	CPD-9618 [ C16 H12 O5, tgt=66.17, overall=66.17 ]			(285.0729, 17087.656)(286.076, 1152.8114)	14.6012
CPD-9619	3059184	3017197	1	1	1	1	1	257257	3620014	3609819	4100908	3996851	2371737	1	4045632	3929562	2667198	2730694	2570464	1	2588383	2557303	2372935	2234197	286436	269402	1	281749	2764049	1	CPD-9619	CPD-9619 [ C16 H11 O7, tgt=37.97, overall=37.97 ]			(333.08292, 1594.5748)(315.79935, 44753.92)(316.46164, 7815.6274)(317.08755, 962.15826)	11.8344
CPD-9616	434030	4076353	3575490	4281536	3666541	3637170	3435498	3346427	3659974	3646197	767613	4073479	3647468	3526909	4048824	3854457	3446251	3466798	390850	389135	365251	367300	400961	372019	2597772	2465517	2825832	2794797	2796284	2759343	CPD-9616	CPD-9616 [ C17 H14 O6, tgt=72.49, overall=72.49 ]			(315.08203, 21263.723)(316.08508, 2349.8848)(315.08405, 134785.69)(316.08664, 19918.328)(317.0889, 1390.9614)(337.06458, 10069.109)(338.0679, 1405.6364)	12.1566
CPD-12421	861230	785620	845386	846011	823478	788569	619788	580131	442301	418659	452169	442589	448855	388868	519928	549676	343746	335238	429879	348704	347325	351350	292875	283978	608904	485844	311060	271252	548762	528029	CPD-12421	CPD-12421 [ C18 H22 N O11 S2, tgt=41.82, overall=41.82 ]			(497.06232, 4071.9841)(499.0389, 811.35)	7.3666
CPD-9615	610973	593903	650838	641235	634550	641660	523885	525751	479499	555254	1	567885	551653	556786	605164	529552	574824	585566	529728	458817	442482	1	1	1	566988	461440	501271	424331	506184	505700	CPD-9615	CPD-9615 [ C17 H13 O7, tgt=55.98, overall=55.98 ]			(347.0993, 26344.969)(348.1012, 1141.8335)	13.9673
PROTOPINE	1998466	1	1	1	800457	1	2314228	2339867	1	1	1	1	2371541	1	1	1	2015033	1	1873701	1840510	1787797	1753714	1815463	1800991	188536	1	252574	1	1	231221	PROTOPINE	PROTOPINE [ C20 H19 N O5, tgt=44.21, overall=44.21 ]			(353.11682, 95857.195)(354.11942, 12052.756)(355.12204, 2118.5981)(335.1205, 14476.58)(336.1234, 741.76)(355.13287, 10470.865)(356.64148, 4040.66)(357.148, 10204.58)(373.16513, 7085.718)(353.1598, 1233.96)(377.2009, 1137.3892)(378.45798, 564.77997)(359.10718, 343.5425)	8.35627
CPD-10077	12262059	1	1	1	748072	9553251	1453281	1498092	1126469	1119047	7781132	7639135	10545858	1593843	1364117	1355586	1855678	4954494	8262063	8211928	7869081	7804365	7855971	7688628	11122787	10243259	10110778	10046322	1455640	1439032	CPD-10077	CPD-10077 [ C23 H24 O10, tgt=11.66, overall=11.66 ]			(445.1437, 599.515)(461.1562, 3117.17)(444.00128, 1706.4792)(479.2806, 27633.393)(480.12054, 6069.8545)(480.1879, 6612.52)(461.1574, 5851.762)(462.1619, 283.89)(484.64453, 35372.93)(484.7434, 15015.56)(485.14343, 5162.9297)	9.29189
CPD-9610	4330724	948186	4212799	4447900	4692879	4575677	601680	383610	341618	386990	388638	643436	614815	455554	673756	647327	730012	188150	483291	397828	6450515	6585768	8818396	10109382	3727315	3716704	7040436	6741424	358448	730431	CPD-9610	CPD-9610 [ C50 H81 O7 P2, tgt=51.61, overall=51.61 ]			(856.8555, 4882.193)(859.1812, 1723.5391)(861.5482, 804.12)(837.9438, 4802.389)(839.51825, 3045.6577)(840.5365, 16019.56)(841.5376, 5258.9)(842.54376, 1790.068)(856.55896, 14502.318)(857.56287, 6496.0767)(858.5667, 1283.89)(839.9317, 7381.891)(840.9765, 3921.1936)(842.62146, 38298.32)(843.6472, 21343.055)(844.556, 5728.2266)(873.57324, 111015.945)(874.57434, 17631.02)(875.5757, 404.81)(856.5632, …	19.1533
GLC-D-LACTONE	753991	491858	397898	1	1	498994	912860	571370	258921	1	308356	1	993652	618152	444105	856879	446401	201075	1253013	220775	499860	482386	205545	324196	1511622	1048049	1	450056	322637	1	GLC-D-LACTONE	GLC-D-LACTONE [ C6 H10 O6, tgt=41.96, overall=41.96 ]			(201.04236, 28576.297)(202.04663, 1520.9891)(188.03676, 4166.422)	1.393
CPD-17621	101414	102472	1	1	102362	107934	294745	250328	86263	85321	110116	112052	175007	1	1	1	1	1	88918	81746	1	1	92486	100310	191877	179410	213010	226004	155945	147126	CPD-17621	CPD-17621 [ C37 H62 N7 O18 P3 S, tgt=15.02, overall=15.02 ]			(1000.2205, 7035.212)(1001.32275, 2761.4426)(1000.277, 7119.81)(1001.2744, 4107.99)(1002.2744, 767.88)	11.0838
CPD-17627	2014491	1968330	1580153	1541580	1655792	1694000	1811190	1796726	1451010	1395646	1275764	1239352	1788890	1768903	1377778	1396433	1201444	1224166	1635384	1617336	1741724	1810197	1500803	1469071	1912574	1832182	1534939	1535660	1244158	1218888	CPD-17627	CPD-17627 [ C37 H62 N7 O19 P3 S, tgt=34.43, overall=34.43 ]			(1056.2861, 31830.69)(1057.2852, 18480.34)(1058.283, 7633.0977)(1059.281, 2328.1538)(1060.2769, 168.67)	29.1576
CPD-17624	4370563	4259647	3424535	3335520	3587466	3672086	3923920	3889905	3134655	3017162	2752566	2667929	3869942	3816969	2973101	3015191	2585263	2643912	3545394	3499448	3763630	3922683	3249210	3174413	4143706	3976559	3328036	3320146	2685253	2635039	CPD-17624	CPD-17624 [ C39 H61 N7 O19 P3 S, tgt=8.79, overall=8.79 ]			(1056.2854, 31794.592)(1057.2843, 18482.955)(1058.2832, 7594.3003)(1059.281, 2273.546)(1060.2769, 174.29)(1056.288, 34276.703)(1057.287, 19907.621)(1058.2844, 8179.08)(1059.2827, 2504.19)	29.1594
CPD-9629	434030	1	1	4281536	3666541	3637170	3435498	3346427	1	1	1	1	1	1	4048824	1	1	1	1	1	1	1	1	1	2597772	2465517	1	1	2796284	2759343	CPD-9629	CPD-9629 [ C17 H14 O6, tgt=72.49, overall=72.49 ]			(315.0826, 22606.8)(316.0856, 2505.1)(315.08405, 136409.52)(316.08667, 20296.934)(317.08902, 1524.8298)(337.06454, 6040.115)(338.06784, 1507.96)	12.391
CPD-9624	4785805	4674840	6535490	6502226	2146202	5510221	3769077	3853153	3685231	3662235	5382918	5472867	4767058	5025845	5332224	5234069	4277129	4276114	3733701	3821534	4676626	4699265	3016731	2975009	3376581	3462431	2593155	2455971	4699305	4622002	CPD-9624	CPD-9624 [ C15 H10 O6, tgt=80.83, overall=80.83 ]			(287.05295, 197572.98)(288.05554, 25291.988)(289.0577, 2443.8167)	6.756
CPD-9625	1024982	1000999	1111695	1089398	1044649	1051841	708237	737664	599252	605047	1010986	1027674	803361	813862	937910	951414	795750	803177	659482	647401	800348	773400	545324	533707	765657	795688	539871	506454	1088872	1094587	CPD-9625	CPD-9625 [ C15 H10 O5, tgt=68.30, overall=68.30 ]			(271.05765, 42230.95)(272.06058, 4648.317)(295.0494, 77533.125)(296.05362, 9707.385)	7.528
CPD-9626	916502	841872	1168988	1124485	982361	981593	990144	862925	1146336	1230547	1	879379	946025	833216	974545	982917	930009	936056	899536	798565	1	1	919085	879915	857156	730461	963285	920441	928122	901336	CPD-9626	CPD-9626 [ C15 H9 O6, tgt=14.19, overall=14.19 ]			(289.0636, 3049.1233)(303.08133, 19607.455)(304.08307, 639.4068)(305.07465, 1429.415)(289.06543, 3898.93)(291.9269, 2230.1655)(292.01874, 688.51)	2.09107
CPD-9620	187628	174831	1	209338	114104	113493	172678	169220	139304	141414	220160	230047	173972	186330	157667	157243	122564	128307	155362	159075	132243	132161	157298	167925	85557	133458	108506	96446	211679	208274	CPD-9620	CPD-9620 [ C15 H10 O7, tgt=48.31, overall=48.31 ]			(303.04654, 10334.154)(304.04993, 328.76)(287.0528, 180141.89)(288.05545, 23499.203)(289.05765, 3011.0125)(325.0869, 916.5467)	6.7208
CPD-9621	1467583	1403777	1940611	1953287	1676656	1652621	1036237	1016901	1404767	1408632	1996762	2040334	1212297	1203300	1856381	1864597	1044616	1043296	1176808	1118530	1266667	1274978	908583	507634	1108257	1076127	704303	678765	959394	946254	CPD-9621	CPD-9621 [ C18 H14 O8, tgt=72.89, overall=72.89 ]			(341.0604, 6494.01)(341.0616, 16135.706)(342.06473, 1334.1637)(376.09827, 543.5455)(359.07217, 8633.046)(360.0754, 668.27)(363.10284, 188.759)	6.5786
CPD-9622	37694676	36923940	35189084	34845144	35253428	35104672	30158942	29553420	30350100	29882952	36143432	36247292	32298576	31864508	32059128	31838012	31855546	31542936	27100996	26494452	27380542	26708800	24803048	24960996	30984630	30214738	27920592	27731912	32786908	32370890	CPD-9622	CPD-9622 [ C18 H16 O7, tgt=76.66, overall=76.66 ]			(345.09433, 1028710.6)(346.09744, 181559.3)(347.09912, 23705.725)(348.101, 1022.4571)(365.6016, 817.1944)(367.07538, 132250.84)(368.9967, 4024.6887)(369.08105, 2693.755)	13.9696
CPD-17611	1814741	1913358	2208186	2232721	2113408	2129048	3024908	3204958	2565100	2579797	2663486	2637779	2593919	2904267	3074730	3123783	3588056	3627658	3169744	3315993	3421123	1	3189370	3119523	2577475	2887869	2575708	2585985	3095268	3085359	CPD-17611	CPD-17611 [ C22 H22 O10, tgt=43.38, overall=43.38 ]			(449.13608, 1586.1112)(450.1393, 193.06)(432.11313, 454.94598)(449.1355, 2919.846)(450.1391, 430.56332)(432.92493, 89318.64)(435.1226, 352040.16)(469.1616, 652.3563)(446.40848, 1461.98)(451.09525, 46668.137)(452.09714, 6804.0283)(453.09482, 2666.5461)	9.1602
CPD-17614	1861891	1781807	1204973	1215546	1435978	1454476	1738377	1	3005050	1	2187296	2211065	1	1	2208066	2171572	2110542	1	1	1701777	1	1773606	1557223	1	3270539	3101435	2183682	2184913	1996501	2013339	CPD-17614	CPD-17614 [ C18 H29 O3, tgt=55.65, overall=55.65 ]			(293.20847, 57001.734)(294.2114, 8478.468)(275.19775, 17644.361)(276.2009, 1620.612)(277.21274, 41780.285)(278.21564, 5551.06)(279.22336, 771.8467)(316.19315, 4826.6675)	15.154
CPD-17616	423349	418113	423378	414597	411231	408043	351409	354568	432141	427358	452473	479446	393734	393217	431262	434906	392291	392022	330581	511547	360848	359362	1	1	419959	399788	336849	344051	435201	437198	CPD-17616	CPD-17616 [ C16 H12 O5, tgt=66.17, overall=66.17 ]			(285.0729, 17087.656)(286.076, 1152.8114)	14.6012
CPD-19784	832662	153475	152828	148801	154371	798429	159410	150630	150610	153609	980769	160468	143551	722184	848039	156735	896002	898380	881941	852927	947773	941164	738084	727227	135473	128360	139354	682045	156634	145825	CPD-19784	CPD-19784 [ C11 H14 O4, tgt=35.73, overall=35.73 ]			(193.08426, 8699.369)(228.12901, 15718.5)(229.13171, 2533.0735)(210.1183, 9343.648)(211.12872, 796.57666)	4.715
CPD-19789	548741	508256	685395	695353	595911	591034	672769	670659	1337020	1310999	1096989	1075964	573093	554697	671162	678214	344159	348311	462786	457640	304129	296980	571385	575846	250740	262276	441252	429140	285732	279886	CPD-19789	CPD-19789 [ C21 H29 O4, tgt=59.10, overall=59.10 ]			(327.19763, 23203.549)(328.20065, 2488.276)(345.22705, 8674.33)(346.22888, 1285.02)(371.20126, 5784.327)(352.79037, 23488.533)(354.19495, 3885.1797)	3.9836
CPD-16891	643403	628984	1	1	534175	1	136592	131995	1	112568	1	1	1	1	553364	1	1	1	142678	1	1	1	1	1	614588	1	639182	636399	1	1	CPD-16891	CPD-16891 [ C6 H14 N O4, tgt=57.93, overall=57.93 ]			(182.12434, 29396.31)(183.1272, 520.81287)(189.08952, 67639.4)(190.09239, 7257.195)	10.1898
NARINGENIN-7-O-BETA-D-GLUCOSIDE	16794852	16317742	371965	373242	16310322	16431451	20365356	21320456	613678	608367	17752396	691880	681727	745411	906036	953495	1251574	1296021	20278428	1007201	1122236	1137368	19457396	18996678	655535	715195	17436384	17498756	788244	783931	NARINGENIN-7-O-BETA-D-GLUCOSIDE	NARINGENIN-7-O-BETA-D-GLUCOSIDE [ C21 H22 O10, tgt=82.87, overall=82.87 ]			(435.12173, 192268.11)(436.1242, 33984.836)(437.1253, 11382.041)(438.1262, 152.94)(435.1203, 345170.75)(436.1227, 59952.82)(437.1234, 8912.45)(457.1627, 475.7)	8.9556
CPDQT-425	20206724	19614236	21186836	20691782	19707208	19821576	24492380	25747088	20250064	20222800	21184204	20917768	22165454	23932514	26115716	25644540	28927534	28868272	1	25366578	26889148	26754472	1031149	22740332	22441386	23915652	21083928	21106226	25735192	25353092	CPDQT-425	CPDQT-425 [ C19 H23 N4 O6 S, tgt=42.45, overall=42.45 ]			(435.12238, 390510.28)(436.12485, 69934.36)(437.1254, 10999.779)(441.1452, 704.7572)(457.68326, 1815.3481)(458.66138, 2725.83)(441.1653, 2263.4)	9.1624
CPDQT-426	141463	1	196877	188506	159881	158200	149390	1	187007	187526	139216	139172	142134	1	130911	137353	1	1	136759	1	1	1	135595	140011	142846	1	177377	170821	149375	147260	CPDQT-426	CPDQT-426 [ C15 H15 N O6, tgt=39.13, overall=39.13 ]			(305.08942, 7055.753)(291.14026, 20305.021)(292.08408, 916.58563)(325.1358, 21457.074)(326.13834, 2941.6177)(328.14548, 18604.451)(330.09192, 81251.14)(331.08987, 11095.552)(332.99728, 8558.526)(333.08954, 7278.825)(314.0877, 6423.7466)	2.164
CPDQT-427	1	89902	141661	134670	102318	111032	160305	152237	121662	127129	136394	132266	166548	147807	190380	185115	196603	205608	182077	186047	182477	182526	171322	166346	159655	144181	102574	101581	170079	158270	CPDQT-427	CPDQT-427 [ C12H14N2O2S, tgt= ]			(273.10947, 55884.805)(274.1124, 8172.1143)(255.09892, 23551.729)(273.0624, 9768.133)	9.1894
CPDQT-428	367535	369655	654130	660099	503666	493454	606540	625352	709849	715012	751247	802334	783942	794131	813790	824733	682889	688246	808407	805849	756348	740146	770998	773493	1023429	1018364	505159	509037	759865	754164	CPDQT-428	CPDQT-428 [ C9 H9 N O, tgt=47.14, overall=47.14 ]			(170.0585, 20816.004)(171.06175, 1015.5873)(130.06401, 6339.383)(153.08958, 573.3736)(149.09476, 462.91373)	4.2966
CPDQT-424	1848555	1767927	1317640	1300005	1497993	1460918	2181030	1772723	1317244	1294502	1165832	1160732	2087610	1702956	1359546	1371027	1676874	1671298	1674102	1351499	1355013	1349584	1282329	1217995	1905967	1561170	1311345	1291847	1411054	1376574	CPDQT-424	CPDQT-424 [ C17 H14 N2, tgt=65.27, overall=65.27 ]			(247.1266, 439.51)(266.15704, 743.725)(269.1045, 61845.83)(270.10583, 5798.6626)	2.1094
CPDQT-429	143823	118187	1	1	90150	1	135969	99370	1	1	1	1	188054	129511	1	1	1	1	119012	1	87585	92336	1	1	171914	122783	1	1	1	1	CPDQT-429	CPDQT-429 [ C10 H8 N2 S, tgt=39.56, overall=39.56 ]			(188.03731, 8366.196)(189.04216, 890.42334)(211.0798, 1372.05)	1.41041
PENTOSE-RING	220364	222475	272973	266275	269975	226574	229156	206689	254144	246170	1	1	229618	181117	1	178060	1	1	250491	1	1	1	1	1	342717	257657	219478	195329	1	1	PENTOSE-RING	PENTOSE-RING [ C5 H10 O5, tgt=43.80, overall=43.80 ]			(150.0539, 7047.5386)(151.0603, 144.185)(137.05736, 4852.0947)(137.05939, 5802.113)(168.0904, 738.69995)	2.3134
CPD-12236	1	1	1	1	1	1	1	1	1	1	1	1	1614646	1	1	1	1	1	1	1	1	1	1	1	1597890	1443621	1530735	1	1	1	CPD-12236	CPD-12236 [ C15 H23 N4 O3, tgt=47.56, overall=47.56 ]			(289.1615, 455.37)(328.21835, 470.7367)(312.16183, 3555.1973)	3.997
CPD-12237	1	1	1	1	1	1	1	1	1	1	1	1	1	1	1	1	1	1	1	1	1	1	1	1	183901	164770	122811	123088	1	1	CPD-12237	CPD-12237 [ C14 H21 N4 O3, tgt= ]			(318.16138, 1267.12)(296.1669, 1402.0675)	3.329
CPD-0	1	1	133131	145072	1	1	144379	1	170481	163767	132499	115255	193163	161851	140010	134420	101210	100830	227003	172916	201457	197024	146986	135790	151125	116676	114798	139968	127245	138377	CPD-0	CPD-0 [ C10H8O4, tgt= ]			(216.7989, 435.82938)(175.03539, 6635.241)(176.03723, 524.9408)(211.07974, 1015.4025)	1.46439
CPD-8962	2879028	2868924	2886640	2898606	2875891	2854241	4378369	3327415	2600778	2571751	2930414	2945386	3539650	2715259	3044117	3095269	3544115	3482482	4160456	3154617	3353355	3370164	2861161	2824066	3426874	2734299	2764251	2774832	3491369	3482618	CPD-8962	CPD-8962 [ C23 H24 O9, tgt=46.79, overall=46.79 ]			(445.15662, 3010.2158)(427.1332, 96850.195)(428.13556, 15166.121)(445.1586, 2349.31)(447.1735, 173.27)(471.14606, 255.34145)(455.12802, 1935.6498)	4.873
CPD-8961	675762	606607	480912	465248	545035	515279	754254	676199	344534	330492	1	1	960911	907168	645141	681964	690222	733693	642310	556038	483671	448833	1	1	964327	874119	1	583091	653597	646459	CPD-8961	CPD-8961 [ C23 H24 O8, tgt=57.94, overall=57.94 ]			(428.15573, 840.0123)(414.34705, 2998.7205)(415.15332, 3770.9014)(414.60623, 4655.3564)(415.95468, 1162.196)(450.1903, 1242.7095)(452.2002, 533.21704)(429.16953, 1127.3844)(455.148, 870.7779)(457.1526, 5723.2954)(437.13638, 461.17667)	5.8154
TRANS-CINNAMOYL-BETA-D-GLUCOSE	3090590	3062962	4364277	4306247	3645479	3594926	2994213	2946077	3648229	3651166	4124127	4020965	3250932	2301724	4075865	3960515	3081015	2769644	2588494	2542988	2607405	2576816	2392555	2252686	2561731	2481435	2515151	2475813	2795593	2741516	TRANS-CINNAMOYL-BETA-D-GLUCOSE	TRANS-CINNAMOYL-BETA-D-GLUCOSE [ C15 H18 O7, tgt=96.44, overall=96.44 ]			(293.0935, 610.94415)(315.0837, 131910.45)(316.0863, 19667.94)(317.08856, 1329.9081)	12.1158
CPD-14461	303032	1	1	1	1	1	1	1	1	1	1	1	1	128325	156420	158070	180863	169436	1	1	1	1	1	1	203449	1	1	1	1	1	CPD-14461	CPD-14461 [ C15 H16 O9, tgt=38.36, overall=38.36 ]			(340.08423, 6908.864)(341.08014, 2335.0728)(359.12363, 4101.39)(361.1215, 14955.844)	3.08064
INDOLE-3-ACETALDOXIME	836982	730384	751490	761271	717038	730170	1058333	752750	815315	750261	717858	737624	1223615	858717	805159	701999	737364	706827	1158680	768603	748666	745011	728354	729130	1170004	798883	735277	733540	651605	779177	INDOLE-3-ACETALDOXIME	INDOLE-3-ACETALDOXIME [ C10 H10 N2 O, tgt=66.36, overall=66.36 ]			(157.07007, 59109.74)(158.07158, 9553.441)(199.19096, 7321.498)(200.08165, 1313.02)	1.3974
CPDQT-436	1059976	953381	1183454	1126716	1009660	1036683	1378892	1072794	879509	885412	921182	1271022	981177	935791	947646	964222	1231928	782208	936576	896402	788759	1637871	872503	887994	1187901	1157731	824508	805940	897342	1303714	CPDQT-436	CPDQT-436 [ C10 H13 N2 O, tgt=64.54, overall=64.54 ]			(179.10477, 3170.9854)(159.09029, 20160.082)(160.09161, 1451.6887)(163.1095, 2088.9575)(177.1254, 1716.6394)(182.0795, 22392.092)(183.08276, 2612.0337)	3.27413
CPDQT-434	323223	753018	313962	285239	333107	350387	611178	598511	669078	653107	481746	478988	559703	550379	438832	459478	497394	501696	618422	620454	496825	468587	1	730063	662447	700924	734394	751369	489345	485037	CPDQT-434	CPDQT-434 [ C20 H24 N5 O6 S2, tgt=46.16, overall=46.16 ]			(521.1015, 27119.55)(522.10443, 5522.0127)(523.10925, 698.37836)(479.09918, 40743.535)(480.10187, 6321.3047)(481.10315, 697.48)(497.10825, 12440.977)(498.11093, 1589.8301)(499.1157, 32423.969)(500.11832, 4863.67)(516.5587, 1321.138)(495.15704, 15084.58)	8.2445
CPDQT-432	123936	109456	1	79877	1	1	94002	1	1	1	1	1	161933	88923	1	1	1	1	1	1	1	1	1	1	97604	86630	1	1	1	1	CPDQT-432	CPDQT-432 [ C11 H10 N2 O5 S2, tgt=42.83, overall=42.83 ]			(318.9941, 1655.21)(315.0161, 1874.07)(315.0215, 7750.6255)(316.02377, 1130.6771)(317.02234, 639.905)(320.978, 464.63004)	1.39285
CPDQT-433	753991	670200	397898	1	383286	498626	912860	571370	1	1	1	831126	1	713202	1	1	446401	328842	1253013	1	354085	482386	1	1	1341301	1136234	208563	450056	1	1	CPDQT-433	CPDQT-433 [ C11 H10 N2 O S, tgt=23.38, overall=23.38 ]			(201.0419, 23660.621)(220.05928, 559.7767)(201.15408, 25961.904)(202.04674, 1557.3345)	1.39333
CPD-12217	326309	311277	264765	1	295370	285654	313320	292617	261372	263638	269886	282899	288193	281642	221978	223578	235909	239077	268558	248996	215440	210130	261851	251018	330270	305284	303393	299521	304488	301211	CPD-12217	CPD-12217 [ C15 H14 O2, tgt=45.63, overall=45.63 ]			(227.12543, 9320.424)(231.08409, 14176.562)	5.35058
CHLOROACETOL-PHOSPHATE	1543853	1457321	1198338	1154191	1318649	1304291	1752273	1429319	1185225	1167201	1226119	1233892	1666565	1334557	1063307	1057602	1191038	1160055	1500860	1236422	971388	959500	1343570	1320659	2303519	1822543	2109039	2077673	1500838	1493627	CHLOROACETOL-PHOSPHATE	CHLOROACETOL-PHOSPHATE [ C3 H4 Cl O5 P, tgt=29.91, overall=29.91 ]			(210.93881, 48235.305)(212.93855, 6340.4136)	1.8486
CPD-12224	1636952	1496241	2316510	1610283	1535671	1540295	1468835	1479922	1710010	1691501	1985177	1858428	2373427	1665186	1622588	1873378	1958443	2513723	1574406	1633736	1903748	1879139	1370443	1261697	1607868	1633166	1636265	1340943	2531174	1719449	CPD-12224	CPD-12224 [ C9 H14 O, tgt=71.10, overall=71.10 ]			(142.12154, 32399.543)(121.10033, 38142.2)(122.10346, 1810.3208)(156.13676, 9641.882)	16.5222
CPD-14474	9783248	9441748	17199482	17096974	12888118	12843041	15704091	15050089	17051200	17026008	19485936	20139110	19651234	19322338	21025540	20875424	17885396	17545492	21670622	20680140	19414864	19160156	20209566	20289448	27876408	26421116	13208742	13157065	19689620	19699198	CPD-14474	CPD-14474 [ C9 H11 N O2, tgt=91.63, overall=91.63 ]			(166.08522, 733.50336)(170.3569, 4457.5723)(153.08957, 514.9215)(188.06976, 729356.3)(189.07253, 76402.5)(190.07465, 4634.8057)(170.05853, 19945.914)(171.06175, 968.51733)	4.2978
CPD-12225	1358175	1306090	1529703	1531202	1369039	1379102	1371731	1342981	1830648	1802460	1344904	1321092	1453922	1498535	1339277	1331802	1182316	1160327	1181158	1184835	954606	953822	1338802	1331911	1374568	1349785	1495122	1482946	1215102	1194791	CPD-12225	CPD-12225 [ C11 H18 O, tgt=82.51, overall=82.51 ]			(167.14143, 542.5195)(189.12578, 34790.508)(190.12871, 3007.8857)(171.11522, 936.3163)	5.0158
DIAMINONONANOATE	1	1	1	1	1	1	1	1	1	1	1	1	452495	1	1	1	1	1	1	1	1	1	1	1	394932	1	1	1	1	1	DIAMINONONANOATE	DIAMINONONANOATE [ C9 H21 N2 O2, tgt=56.66, overall=56.66 ]			(171.14786, 23155.59)(172.1488, 760.28)	2.095
CPD-13346	1597200	1554105	1551746	1558199	1500786	1251041	974241	675013	780989	752896	1019260	1012051	1010987	829653	1494961	1473481	870609	1005298	1456166	1213943	1325276	1200376	1094875	1043341	1531013	1290797	924494	889007	1126500	1108452	CPD-13346	CPD-13346 [ C6 H12 O2, tgt=74.28, overall=74.28 ]			(118.08526, 596.3156)(100.07523, 2567.4568)(142.0848, 206.61)(121.06402, 32016.43)(122.06728, 2396.007)	2.3432
CPD-14478	3366639	3304639	3056212	3044223	3072594	3083160	2772103	2805688	1685139	2685216	1717667	4172337	2713595	3249992	1365911	2250408	2963719	2970373	3260630	3309087	3438965	3487716	3029229	2969843	2209591	2594154	2262074	2271815	1980388	2068507	CPD-14478	CPD-14478 [ C28 H40 O9, tgt=90.05, overall=90.05 ]			(507.2619, 124.01001)(538.30084, 59197.414)(539.30444, 12471.224)(540.3125, 845.09753)	15.8602
CPD-12222	3104482	3010030	1	1	1	3464831	1	1	1	1	1	1	1	6424887	6275969	6266645	6989378	7155188	1	1	1	1	1	1	4276718	4127714	3065020	3037253	4780834	4716770	CPD-12222	CPD-12222 [ C10 H16, tgt=80.60, overall=80.60 ]			(137.13193, 211418.33)(138.1348, 17968.33)(154.15779, 19807.553)(155.16086, 1139.7963)(159.11513, 257.82)	10.417
CPD-14479	662326	627495	5854606	5980052	9690900	9602225	322783	300502	317899	323585	7499737	5874325	615291	606481	4699110	7420771	9480312	9504607	10542843	10723455	474276	482834	428188	413685	662337	666671	1151922	1117273	5529561	5527591	CPD-14479	CPD-14479 [ C28 H40 O10, tgt=52.19, overall=52.19 ]			(538.2711, 15182.585)(539.274, 3403.1274)(555.6319, 12820.055)(556.0992, 1000.23)(537.29865, 352272.0)(538.30115, 91083.37)(539.3021, 14543.203)(540.3003, 2909.5474)(541.3025, 324.73)(563.26074, 7378.8223)(564.26355, 1404.7175)	14.4587
HIS	3311795	3199274	2045779	2075681	2639318	2628555	2940239	3199926	2971108	2934953	2621795	2609931	1700964	1774415	2434203	2511077	2447615	2462633	2456641	2496588	2529947	2506406	2557055	2555520	3202538	3432776	3906936	3796930	3450794	3472686	HIS	HIS [ C6 H9 N3 O2, tgt=85.73, overall=85.73 ]			(137.0589, 106900.54)(138.06192, 6858.4966)(163.05846, 1040.4146)	7.8962
CPD-12208	1	1	1	1	1	1	1	1	1	1	1	1	1	1	1	1	1	1	1	1	1	1	1	1	90568	1	1	1	1	1	CPD-12208	CPD-12208 [ C11 H9 O4, tgt=40.52, overall=40.52 ]			(188.0382, 12103.19)(189.0432, 2023.77)	1.401
CPD-12205	480368	437652	632944	773202	309758	351687	162441	124532	448259	453351	211294	217899	504639	1	860301	503815	872237	556850	180403	157442	462335	109209	176679	149507	422079	369538	519685	543124	461266	615588	CPD-12205	CPD-12205 [ C19 H18 O2, tgt=34.44, overall=34.44 ]			(261.1284, 2327.3352)(261.12772, 5178.436)(296.31012, 1092.2101)(283.17242, 13961.999)(301.1211, 12700.304)(302.11972, 2751.5024)(303.1357, 397.61)(283.10437, 572.31)	4.14359
10-DEACETYL-2-DEBENZOYLBACCATIN-III	117329	108250	175742	170936	132594	139106	165972	159541	226608	226648	6624530	104530	187745	185088	160029	140709	154440	151426	120625	108887	5966298	5923519	124187	4156004	138035	118059	223191	188383	133926	140363	10-DEACETYL-2-DEBENZOYLBACCATIN-III	10-DEACETYL-2-DEBENZOYLBACCATIN-III [ C22 H32 O9, tgt=42.32, overall=42.32 ]			(441.16647, 4279.6997)(422.9424, 2290.588)(423.19678, 2763.2993)(441.15036, 4656.865)(442.2455, 6392.26)(446.1996, 5102.19)	7.7704
CPD-11945	1143126	1107958	1233429	1216562	1160437	1166759	777421	808764	661050	671539	1130782	1139114	886147	903350	1040483	1057393	882691	888236	716768	711204	886391	856923	598947	581062	843915	877225	597074	555256	1211500	1216248	CPD-11945	CPD-11945 [ C15 H11 O5, tgt=61.28, overall=61.28 ]			(271.05765, 42817.426)(272.06058, 4725.5254)(295.0493, 76523.266)(296.05344, 9537.405)	7.52717
CPD-12209	11382422	10279630	6708920	6869725	8512832	8805172	11949076	12018319	17256524	17338364	1	14403336	10963840	11111597	12541783	13342021	15079484	14384596	17799332	17860396	19398012	19370736	16114566	16148017	23846256	23711748	16321741	16512621	13102441	12814129	CPD-12209	CPD-12209 [ C20 H14 O2, tgt=49.06, overall=49.06 ]			(271.09366, 8476.747)(272.09677, 672.705)(286.11813, 463719.47)(287.12088, 72190.59)(288.12283, 6750.499)	16.1658
CPD-14485	271534	259409	479708	484933	352061	354769	412360	359067	615810	594684	414418	369982	644640	614589	621259	599659	543595	551140	978120	955275	767622	764731	1056291	929591	445874	426999	389868	380715	1	1	CPD-14485	CPD-14485 [ C30 H46 O3, tgt=36.43, overall=36.43 ]			(455.34537, 10389.048)(456.34848, 1432.3156)(437.3354, 5453.4053)(438.33716, 677.5433)	16.2834
CPD-12214	252951	221086	3453555	178274	196706	245098	382435	267107	348880	347735	175211	149771	2660236	2505205	136795	137596	3529027	3481541	3755340	7474471	8444314	1	111556	109941	12596965	4850523	7998106	3340495	101215	97855	CPD-12214	CPD-12214 [ C37 H43 N3 O9, tgt=43.79, overall=43.79 ]			(675.28674, 233954.3)(676.2895, 94031.195)(677.2911, 25996.268)(697.3521, 4069.8855)(673.33167, 6935.9043)(674.3352, 1278.7767)(678.2915, 2590.473)	10.5564
CPD-13354	2938134	2749635	2717539	2651228	1757318	1762754	2868676	2494003	2621282	2523917	1967565	1943388	2887893	2617548	2156675	2157105	2167766	2126261	1607485	1445749	1326293	1303785	1457976	1417114	2218378	1924150	2132249	2400276	1793750	1780459	CPD-13354	CPD-13354 [ C14 H20 O7, tgt=57.75, overall=57.75 ]			(301.12225, 3136.6648)(303.02994, 1966.583)(282.11716, 681.635)(301.37436, 7692.421)(318.15164, 56577.902)(319.15363, 7071.0996)(305.15387, 2645.956)(323.10663, 8748.921)(324.10513, 1239.562)	2.8974
CPD-14486	2705478	2565191	1480456	1419319	1228835	1228945	2979946	2866235	394357	282869	1277712	155733	2581545	2520829	1	1088445	1006221	1033755	1368056	1322428	2372270	1750733	1234535	1111088	2851601	2781490	1018997	984816	1158469	1	CPD-14486	CPD-14486 [ C30 H48 O3, tgt=60.49, overall=60.49 ]			(456.8416, 11576.801)(457.36493, 5712.9424)(439.34256, 3396.2854)(457.36166, 2071.2634)(439.35156, 21205.041)(440.35452, 5031.0234)(479.34277, 1181.2924)	18.6881
CPD-13353	141102	132759	125994	128763	126062	130566	128566	97873	109967	105342	126350	117363	135472	95406	101604	104086	1	1	159836	117745	117882	118518	119798	109321	163071	131270	1	1	105093	109044	CPD-13353	CPD-13353 [ C6 H13 N2 O3, tgt=46.91, overall=46.91 ]			(185.0899, 309.6)(146.09041, 10346.7)(166.07108, 7422.4165)	2.0684
CPD-12212	1	1106472	1460676	1445822	1243359	1507907	1522498	844998	1998290	1	421995	413022	1567012	1464975	1511201	1373164	1497149	1480587	1520732	1405960	133358	125093	1669271	236504	2150465	2033202	2349472	2310728	1393827	1718105	CPD-12212	CPD-12212 [ C34H37N3O6, tgt= ]			(584.26733, 11494.855)(585.26904, 3569.7102)(567.926, 5254.977)(568.251, 1383.9199)(584.2666, 9989.49)(585.26855, 3130.025)(569.28485, 6939.053)(601.28864, 1644.9434)(607.21075, 54665.41)(608.2509, 20726.951)(609.2602, 18338.914)(610.26587, 5697.69)(611.26874, 1139.5675)(593.2634, 5545.785)	18.6298
CPD-12213	1039172	950458	1	550553	808461	836729	1154528	1082208	921536	879371	727758	719194	1370253	1340503	726597	711201	506589	517535	951741	488382	803608	805335	961733	327959	1051310	1035028	641395	622552	633585	662541	CPD-12213	CPD-12213 [ C34 H37 N3 O9, tgt=57.32, overall=57.32 ]			(659.24066, 8312.61)(660.2418, 3244.1501)(615.24963, 3338.6367)(616.25256, 767.487)(637.25726, 25379.098)(649.26996, 640.31165)(637.2582, 31905.781)(638.2607, 10947.741)(641.25366, 1869.445)(633.28253, 5566.9)(634.28503, 499.02002)	21.1495
CPD-14483	202311	203940	201331	209535	128028	247541	264824	254777	344083	331617	256599	263194	371014	352442	347863	348257	272526	283058	535773	517886	393339	385515	596626	563018	239336	254659	189683	296350	274678	266588	CPD-14483	CPD-14483 [ C30 H45 O4, tgt=59.81, overall=59.81 ]			(453.33047, 15457.637)(454.33325, 4082.5347)(453.33105, 4941.5903)(471.3414, 6214.2524)	14.8634
CPD-7545	1149710	1093382	1340682	1335811	1194237	1197054	1630830	1562885	1356500	1382680	1399295	1359914	1628373	1560823	1698706	1707760	1778663	1838524	1749683	1703651	1684663	1658829	1602768	1537025	115623	106539	1256981	1266370	1624619	1569585	CPD-7545	CPD-7545 [ C11 H15 N2 O3 S, tgt=35.61, overall=35.61 ]			(257.0791, 104151.81)(258.0818, 13737.96)(239.0683, 24927.09)(240.07184, 2592.98)(273.10938, 41943.12)(274.11234, 5481.024)(255.09871, 16823.803)(256.10205, 942.0347)	9.66267
CPD-4703	9418384	9641537	10586392	10349023	9851416	9990194	9876181	9737779	10755192	10647791	672361	11351576	10702454	10895937	10495578	10241005	11195558	11425034	10564437	10450243	11992939	671106	8634457	7996269	10795789	10669489	8654749	8545914	10979255	10765805	CPD-4703	CPD-4703 [ C15 H24, tgt=67.89, overall=67.89 ]			(205.19395, 248927.34)(206.19664, 32715.732)(207.19968, 725.297)	16.5222
CPD-10201	2518314	2439631	1433770	1292249	1815683	1888546	2385237	2498702	2236702	2184364	1950455	1889516	1300360	1301834	1851588	1844692	1838511	1858795	1960534	1937998	1942789	1909433	1903851	1883900	2639584	2674062	3028085	2913579	2620113	2620717	CPD-10201	CPD-10201 [ C7 H10 O3, tgt=82.52, overall=82.52 ]			(124.051155, 85500.055)(125.05447, 4920.188)(147.04198, 1307.9935)	7.8946
CPD-7546	1	1	178751	177974	1	1	274515	1	179010	168404	1	129344	232770	1	150374	1	198277	185554	191823	1	1	1	1	1	227595	1	1	1	170346	160381	CPD-7546	CPD-7546 [ C8 H16 N2 O3 S2, tgt=39.24, overall=39.24 ]			(253.05598, 568.11334)(258.07147, 624.336)(257.3314, 1115.5349)(275.61737, 1400.4451)(260.52646, 2083.1711)	2.09771
CPD-10206	6287015	863254	23289676	1	19161238	872096	4484417	4015263	3662589	3534067	19641160	3851461	4533553	1	4384185	1111906	2824591	2808830	1	15682757	16391789	16085340	14396227	14253092	2969831	2693523	1958026	867008	1	3201881	CPD-10206	CPD-10206 [ C7 H8 O3, tgt=91.78, overall=91.78 ]			(140.04488, 2231.0515)(140.06941, 1711.1543)(163.03795, 222723.31)(164.04094, 17283.428)(165.04388, 2608.809)(145.02682, 4038.9048)	5.5478
CPD-10205	1	818925	1045817	1019623	362988	347097	457907	461809	523673	1	1	375370	1427541	524863	1486734	394910	1740747	578393	1547891	1426128	1	1	1	1310353	516375	527771	568754	192793	512027	1382120	CPD-10205	CPD-10205 [ C6 H6 O3, tgt=45.08, overall=45.08 ]			(109.02778, 15232.887)(127.03845, 33356.367)(128.06009, 250.955)	8.72196
PHE	9783248	9441748	17199482	17096974	12888118	12843041	15704091	15050089	17051200	17026008	19485936	20139110	19651234	19322338	21025540	20875424	17885396	17545492	21670622	20680140	19414864	19160156	20209566	20289448	27876408	26421116	13208742	13157065	19689620	19699198	PHE	PHE [ C9 H11 N O2, tgt=91.63, overall=91.63 ]			(166.08522, 733.50336)(170.3569, 4457.5723)(153.08957, 514.9215)(188.06976, 729356.3)(189.07253, 76402.5)(190.07465, 4634.8057)(170.05853, 19945.914)(171.06175, 968.51733)	4.2978
CPD-8991	250592	238851	232385	238168	236714	221786	212851	187223	251611	264404	2720882	218240	267486	245178	223335	211597	204747	211699	247650	228986	180861	174620	2268662	2456439	243792	217592	210667	214713	2603505	225470	CPD-8991	CPD-8991 [ C12 H10 O2, tgt=47.28, overall=47.28 ]			(187.80193, 28568.035)(187.73279, 75760.555)(209.116, 88966.016)(191.10501, 28594.094)(213.80026, 6425.1846)(213.06926, 681.02)(191.0517, 9843.348)	4.38223
DEHYDROQUINATE	1	2786941	2795985	2779287	2711151	2652218	2533763	2208915	2969878	1	1	2564704	3062712	3105957	1	2608365	2495131	1	1	1	1	1	1	1	2862575	2524131	2563727	2523806	2625873	2653313	DEHYDROQUINATE	DEHYDROQUINATE [ C7 H9 O6, tgt=77.64, overall=77.64 ]			(190.04874, 82385.62)(191.05183, 7331.6465)	4.83732
CPD-10209	158253	435718	375431	266750	282474	144068	148729	237272	254528	249763	132754	360665	208815	200181	227036	232335	235812	162094	223613	88109	1	1	141732	143154	153015	226889	111572	127095	365165	351667	CPD-10209	CPD-10209 [ C9 H14 O3, tgt=46.85, overall=46.85 ]			(193.08415, 4494.202)(153.0898, 3646.3098)(171.336, 3151.6184)(175.11145, 965.46796)(191.14102, 1695.0494)(171.0998, 4203.7)(177.38661, 5212.558)(173.12971, 1096.9236)	5.73468
CPD-10208	112040	98013	101630	98018	96263	92284	213149	112967	111293	107572	101464	100226	123936	95218	160472	117099	110449	1	168909	120670	85668	84907	95150	95362	141171	102662	1	85588	1	88081	CPD-10208	CPD-10208 [ C9 H12 O3, tgt=40.21, overall=40.21 ]			(151.07742, 1047.1385)(173.059, 4227.3105)(174.05545, 2772.0042)	1.3964
CPD-10207	3458995	3333114	1	3194910	3208123	3066093	2680838	2424382	2503897	2090201	1	2426648	2975783	2784541	1	1	1	1	2653058	2453223	2582370	2557758	2158526	1	2145470	1962065	2131427	2076158	1	2383267	CPD-10207	CPD-10207 [ C8 H10 O3, tgt=71.77, overall=71.77 ]			(137.0589, 6049.9893)(177.05461, 43496.527)(178.05669, 2793.0295)(179.06825, 94.93429)(159.04254, 2076.3896)	5.60127
CPD-12201	1	1	241563	90356	124284	123474	187311	186510	261909	272294	239165	225544	1	171464	1	1	228361	223471	271902	268692	309424	310063	251957	250154	412859	419095	278788	278964	205251	198581	CPD-12201	CPD-12201 [ C19H11O2, tgt= ]			(271.0784, 2703.94)(257.07855, 58360.77)(258.08145, 7090.0317)(271.09363, 11907.13)(272.09677, 889.82)	14.3211
CPD-14499	120318	114222	187947	196660	161651	154921	270887	268858	1	1	1	204486	1	1	268787	256342	309719	321367	351716	341093	294013	283033	364324	357305	279629	269173	317135	292097	281212	250141	CPD-14499	CPD-14499 [ C30 H50 O2, tgt=49.71, overall=49.71 ]			(447.39774, 2526.6777)(425.37122, 3773.6094)(425.36984, 4869.9307)(464.42453, 8856.754)(465.42743, 1155.7888)(469.3801, 747.1299)(448.37302, 9500.017)(449.37552, 1755.8542)	21.4916
CPD-12203	457319	420173	235582	230416	327468	305033	446395	484199	395169	388359	275387	263301	431350	493370	355690	352586	422576	419011	302173	350301	322449	313940	358204	518370	298009	327748	455962	459887	351010	342639	CPD-12203	CPD-12203 [ C19 H12 O3, tgt=47.32, overall=47.32 ]			(291.08084, 1705.5494)(273.07898, 358.26334)(293.06064, 18579.443)(294.06357, 835.39594)(295.0599, 632.54755)	1.499
CPD-14496	2705478	2565191	1480456	1419319	1228835	1228945	2979946	2866235	394357	282869	1277712	155733	2581545	2520829	1	1088445	1006221	1033755	1368056	1322428	2372270	1750733	1234535	1111088	2851601	2781490	1018997	984816	1158469	1	CPD-14496	CPD-14496 [ C30 H48 O3, tgt=60.49, overall=60.49 ]			(456.8416, 11576.801)(457.36493, 5712.9424)(439.34256, 3396.2854)(457.36166, 2071.2634)(439.35156, 21205.041)(440.35452, 5031.0234)(479.34277, 1181.2924)	18.6881
CPD-8999	2270644	2192085	2483752	1969987	1186698	1699569	1589896	2157880	2544945	2088788	1853744	1590462	2800384	1951310	2589942	1719680	2286066	1981287	2235318	1991027	1890474	1961233	2330191	2449353	2262930	1794429	2119944	2499125	2605905	1064517	CPD-8999	CPD-8999 [ C6 H9 O6 P S, tgt=45.23, overall=45.23 ]			(223.9712, 435.51)(244.9995, 2891.7812)(223.95413, 11234.399)(225.98558, 2962.8677)(242.00414, 53831.098)(243.91937, 12140.425)(244.0033, 8267.07)	1.3984
CPD-14494	120318	114222	187947	196660	161651	154921	270887	268858	1	1	1	204486	1	1	268787	256342	309719	321367	351716	341093	294013	283033	364324	357305	279629	269173	317135	292097	281212	250141	CPD-14494	CPD-14494 [ C30 H50 O2, tgt=49.71, overall=49.71 ]			(447.39774, 2526.6777)(425.37122, 3773.6094)(425.36984, 4869.9307)(464.42453, 8856.754)(465.42743, 1155.7888)(469.3801, 747.1299)(448.37302, 9500.017)(449.37552, 1755.8542)	21.4916
CPD-14493	862493	799481	1131926	1097567	955557	940827	914663	872858	1059336	1001631	991475	975157	992317	968277	903691	840288	797300	812254	1052403	1033734	1027689	1060693	958384	877835	718925	696635	781717	756243	891210	847687	CPD-14493	CPD-14493 [ C30 H47 O3, tgt=65.69, overall=65.69 ]			(479.34274, 1140.8258)(439.3514, 20330.783)(440.35437, 4734.443)(457.36148, 1908.7617)	18.3434
CPD-14491	120318	114222	187947	196660	161651	154921	270887	268858	1	1	1	204486	1	1	268787	256342	309719	321367	351716	341093	294013	283033	364324	357305	279629	269173	317135	292097	281212	250141	CPD-14491	CPD-14491 [ C30 H50 O2, tgt=49.71, overall=49.71 ]			(447.39774, 2526.6777)(425.37122, 3773.6094)(425.36984, 4869.9307)(464.42453, 8856.754)(465.42743, 1155.7888)(469.3801, 747.1299)(448.37302, 9500.017)(449.37552, 1755.8542)	21.4916
CPDQT-462	166354	105118	1	1	1	1	118591	116814	1	1	1	1	207987	267725	1	1	117123	118501	85822	1	1	1	1	1	120880	155510	127450	112102	1	1	CPDQT-462	CPDQT-462 [ C12 H8 O5, tgt=45.86, overall=45.86 ]			(233.03986, 3040.5647)(219.0398, 379.175)(215.6538, 3299.775)	2.25373
CPDQT-461	284207	263044	279626	283365	273638	262782	345840	295751	440391	423030	376513	381093	473114	380967	346682	351239	312220	321411	419143	333276	306062	306222	349663	329498	393237	338632	296876	283454	300009	282697	CPDQT-461	CPDQT-461 [ C12 H8 O4, tgt=9.68, overall=9.68 ]			(201.0401, 156.47)(222.05862, 1432.2717)(199.04332, 11704.319)(200.04494, 432.16855)(201.03992, 543.95)	2.146
CPD-11924	675762	606607	480912	465248	545035	515279	754254	676199	344534	330492	1	1	960911	907168	645141	681964	690222	733693	642310	556038	483671	448833	1	1	964327	874119	1	583091	653597	646459	CPD-11924	CPD-11924 [ C23 H24 O8, tgt=57.94, overall=57.94 ]			(428.15573, 840.0123)(414.34705, 2998.7205)(415.15332, 3770.9014)(414.60623, 4655.3564)(415.95468, 1162.196)(450.1903, 1242.7095)(452.2002, 533.21704)(429.16953, 1127.3844)(455.148, 870.7779)(457.1526, 5723.2954)(437.13638, 461.17667)	5.8154
CPD-8290	367438	363593	302092	479424	404801	244476	385181	359774	205767	408629	496507	670222	371865	350427	230291	586382	546905	508582	185792	311801	326699	400358	237325	568747	462790	458774	200861	376880	488749	623195	CPD-8290	CPD-8290 [ C41 H78 N O8 P, tgt=64.29, overall=64.29 ]			(761.5784, 9823.366)(762.5787, 342.57)(744.5737, 11083.418)(745.5766, 3239.5356)(766.6794, 8102.899)(767.68225, 2852.9182)(751.2264, 19567.875)(752.5285, 8702.257)	21.2551
CPD-7561	1465035	1478031	949590	947551	1202884	1184008	1736979	1711224	2295160	2296301	2051996	2033669	1522178	1516874	1747141	1784999	2138804	2079050	2371237	2392269	2597909	2656872	2226999	2141763	3704680	3622585	2456407	2448123	1869200	1852146	CPD-7561	CPD-7561 [ C15 H22 O5, tgt=31.48, overall=31.48 ]			(287.12088, 76264.14)(288.12283, 7215.337)	16.1658
CPD-10214	2518314	2439631	1433770	1292249	1815683	1888546	2385237	2498702	2236702	2184364	1950455	1889516	1300360	1301834	1851588	1844692	1838511	1858795	1960534	1937998	1942789	1909433	1903851	1883900	2639584	2674062	3028085	2913579	2620113	2620717	CPD-10214	CPD-10214 [ C7 H10 O3, tgt=82.52, overall=82.52 ]			(124.051155, 85500.055)(125.05447, 4920.188)(147.04198, 1307.9935)	7.8946
CPD-10216	280491	269060	144544	137011	211928	210299	293652	285445	250930	257167	1	206593	115776	1	176711	171480	181606	181232	231719	208816	199412	198949	1	220614	328422	311455	351895	331110	300850	303000	CPD-10216	CPD-10216 [ C12 H18 O8, tgt=0.64, overall=0.64 ]			(309.1293, 1970.0126)(291.11966, 11017.314)(292.1231, 287.68)	7.897
CPD-4721	1762854	1691091	1668991	1646785	1642169	1611585	1638464	1494498	1752271	1736768	1	1888278	1955528	1780591	1762008	1774999	1616963	1603532	2031035	1860033	1639414	1639218	1	1	2259751	2068609	1910707	1883778	1780323	1737471	CPD-4721	CPD-4721 [ C15 H22 O, tgt=44.43, overall=44.43 ]			(241.1527, 57044.758)(242.1555, 6147.98)(226.15268, 2346.8389)(228.16801, 1177.4366)	2.22
5-HYDROXY-CONIFERALDEHYDE	1077559	1072341	1374280	1353175	1180655	1171758	687141	1	1	1	1	1	1594199	1583541	1	1139829	1588870	1606973	769763	1	812507	1	719587	694264	704819	705118	1176794	616980	986246	972565	5-HYDROXY-CONIFERALDEHYDE	5-HYDROXY-CONIFERALDEHYDE [ C10 H10 O4, tgt=69.97, overall=69.97 ]			(177.05429, 17240.326)(178.05647, 435.75934)(215.10472, 2992.4282)(216.10802, 248.60501)(197.0947, 196.66)(201.0415, 687.775)	9.30697
CPD-19818	1825134	828285	937877	625357	822375	814302	1598645	1	1	1	1	1	1054460	1	1	1	1950662	1931072	1739459	1763741	1370892	1354737	1976452	917685	1125917	1	947729	1953955	1	1	CPD-19818	CPD-19818 [ C21 H26 N O5, tgt=56.50, overall=56.50 ]			(354.17114, 2330.0054)(355.16696, 290.48874)(373.17795, 9357.905)(374.18225, 686.97375)(381.46268, 915.2235)(382.16617, 1085.6533)	4.1234
CPD-19817	533104	541800	1	1	327158	332053	366158	374503	520591	536114	387194	384278	1	1	216134	223173	1	1	385312	386401	354312	349813	395490	388547	478185	476407	621135	597694	383452	378114	CPD-19817	CPD-19817 [ C21 H26 N O4, tgt=30.07, overall=30.07 ]			(339.17374, 24321.984)(340.17682, 2525.1863)	9.43484
THIAMINE	509909	474807	415685	424814	452873	437751	1	1	399650	380508	1	389296	1	1	1	1	148556	138280	220335	200073	262941	1	352394	363030	535625	475034	418582	417152	419348	416329	THIAMINE	THIAMINE [ C12 H17 N4 O S, tgt=65.85, overall=65.85 ]			(266.28345, 8512.583)(247.09833, 4857.46)(248.1073, 490.02502)(266.18787, 15358.114)(267.1234, 811.04755)(249.10735, 997.66504)(265.14072, 2609.0974)(271.09256, 355.52307)	5.82013
CPD-19816	4785805	4674840	6535490	6507276	5556323	5510221	3768525	3853153	3685231	3662235	5387147	5477896	4767058	5025845	5332224	5234069	4277129	4276114	3733701	3821534	4676626	4699265	3016249	2974261	3375865	3462431	2593155	2455971	4699305	4627089	CPD-19816	CPD-19816 [ C12 H16 O7 S, tgt=90.98, overall=90.98 ]			(287.05292, 197584.89)(288.05545, 25317.988)(289.05768, 2379.0432)(287.054, 292646.16)(288.0566, 37393.4)(289.05865, 3887.2)(325.08765, 262.53998)	6.7554
CPD-19813	1418484	1408332	1458642	1491061	1350615	1371166	1867255	1362554	1586182	1563304	1396956	1310005	1961418	1338955	1525043	1505670	1309025	1346872	1934597	1223617	1008742	980013	1244483	1151947	1930189	1202920	1288545	1351874	1374970	1212475	CPD-19813	CPD-19813 [ C18 H27 O9, tgt=93.18, overall=93.18 ]			(387.15616, 3732.6414)(370.8696, 1109.1185)(372.41934, 531.4425)(389.1762, 6747.4116)(390.1783, 246.19)(371.88077, 764.8436)(373.17807, 1062.6278)(406.2035, 159317.44)(407.2055, 26266.043)(408.20175, 4047.6882)(387.19696, 46280.37)(388.20004, 7436.438)(411.15976, 225390.89)(412.16177, 36678.742)(413.15723, 9241.153)(393.14655, 534.6875)	4.9974
CPD-19812	106351	114458	299335	592231	1	1	161018	239305	186760	182618	142596	186596	341205	335692	200262	1	359098	359804	1	213581	1	201434	155877	157653	322886	168296	1	1	1	180504	CPD-19812	CPD-19812 [ C18 H25 N O6, tgt=47.30, overall=47.30 ]			(355.16907, 34607.86)(356.17215, 3437.487)(334.06882, 2283.07)(352.3545, 14953.996)(353.37552, 1460.7281)(336.1766, 3242.07)(371.20044, 8708.452)(374.24356, 2585.6565)(376.1687, 10278.06)(358.31982, 3170.5566)(360.1579, 2775.618)(361.15924, 360.315)	6.3317
3-B-D-GALACTOSYL-SN-GLYCEROL	331061	317700	389973	393687	348974	356461	468226	455251	393744	399141	388157	395957	464328	459841	474834	490584	502866	514726	491577	477315	466705	461854	437015	428002	473638	444632	366741	377594	471086	450340	3-B-D-GALACTOSYL-SN-GLYCEROL	3-B-D-GALACTOSYL-SN-GLYCEROL [ C9 H18 O8, tgt=30.11, overall=30.11 ]			(255.09885, 18691.178)(256.10208, 1028.844)	9.1988
HMP	1707409	1653958	1686799	1634798	1569167	1348462	848291	711487	839566	803552	1081919	1074735	1094470	891409	1602800	1569679	936266	1060041	1581287	1311995	1331714	1296772	1179964	1125766	1656708	1398592	981423	947986	1206956	1162738	HMP	HMP [ C6 H9 N3 O, tgt=85.35, overall=85.35 ]			(121.06402, 33865.293)(122.06728, 2569.6077)(142.0848, 214.88)(166.07104, 507.26855)(148.05893, 1912.0839)	2.3432
2-AMINO-4-CARBOXYPYRIMIDINE	795107	738778	736271	318222	1	736492	1218022	1	1	269551	223335	896388	1196034	1114205	1130302	829005	1122877	1	1	994838	1027273	1	145422	1	762222	704314	1	684091	774612	1	2-AMINO-4-CARBOXYPYRIMIDINE	2-AMINO-4-CARBOXYPYRIMIDINE [ C5 H4 N3 O2, tgt=47.61, overall=47.61 ]			(139.60983, 18204.246)(141.37721, 1836.6213)(121.02751, 17643.904)(157.0701, 65341.105)(158.07164, 10693.119)(159.0682, 8558.118)(139.72426, 9491.0)(140.05594, 6882.52)(165.03154, 549.6567)(147.02165, 7696.06)	2.97914
CPD-7557	1762854	1691091	1668991	1646785	1642169	1611585	1638464	1494498	1752271	1736768	1	1888278	1955528	1780591	1762008	1774999	1616963	1603532	2031035	1860033	1639414	1639218	1	1	2259751	2068609	1910707	1883778	1780323	1737471	CPD-7557	CPD-7557 [ C15 H22 O, tgt=44.43, overall=44.43 ]			(241.1527, 57044.758)(242.1555, 6147.98)(226.15268, 2346.8389)(228.16801, 1177.4366)	2.22
CPD-10235	12486190	12109004	12448769	12326703	11741817	11606654	14279141	13392109	13770007	13493634	14174210	14154992	14260860	13308940	13845407	13571260	12848478	12946483	13032714	12323040	13886843	13704356	10295400	10098006	14436031	13557574	9877263	9897280	12249947	12076728	CPD-10235	CPD-10235 [ C23 H34 O23, tgt=41.27, overall=41.27 ]			(679.1708, 246559.33)(680.2734, 77033.305)(681.2733, 15868.755)(682.1725, 1270.9268)(679.1731, 239749.16)(680.17554, 81577.08)(681.17554, 16736.031)(682.17456, 1362.7228)	15.6758
CPD-7558	1599694	1548276	2428692	2396259	1953895	1944129	2090042	2060672	3114120	3030517	2262910	2367710	3041637	2805200	2596052	2571227	2869631	2975056	2452942	2374854	2622698	2649314	1	2109538	2370260	2207796	1897875	1891152	2140658	2152033	CPD-7558	CPD-7558 [ C15 H24 O, tgt=69.83, overall=69.83 ]			(221.18784, 15101.732)(222.19096, 1013.4632)(203.17793, 86202.69)(204.18082, 11153.496)	10.6462
CPD-8289	142146	146555	507403	547819	390879	363335	285506	280938	565293	529014	620094	626747	252700	248990	547712	546205	550321	543813	427666	398422	208546	205467	513362	502176	258646	263295	538195	537772	630978	620984	CPD-8289	CPD-8289 [ C41 H80 N O8 P, tgt=64.94, overall=64.94 ]			(768.55255, 18756.559)(769.55536, 7164.474)(770.55786, 742.8713)	22.5368
CPD-7556	1599694	1548276	2428692	2396259	1953895	1944129	2090042	2060672	3114120	3030517	2262910	2367710	3041637	2805200	2596052	2571227	2869631	2975056	2452942	2374854	2622698	2649314	1	2109538	2370260	2207796	1897875	1891152	2140658	2152033	CPD-7556	CPD-7556 [ C15 H24 O, tgt=69.83, overall=69.83 ]			(221.18784, 15101.732)(222.19096, 1013.4632)(203.17793, 86202.69)(204.18082, 11153.496)	10.6462
CPD-7554	9418384	9641537	10586392	10349023	9851416	9990194	9876181	9737779	10755192	10647791	672361	11351576	10702454	10895937	10495578	10241005	11195558	11425034	10564437	10450243	11992939	671106	8634457	7996269	10795789	10669489	8654749	8545914	10979255	10765805	CPD-7554	CPD-7554 [ C15 H24, tgt=67.89, overall=67.89 ]			(205.19395, 248927.34)(206.19664, 32715.732)(207.19968, 725.297)	16.5222
CPD-11940	889529	860994	350545	358104	692875	690920	1038728	1014241	1380169	1384431	1234463	1214878	898770	901425	1054253	1046000	1248499	1217166	1440937	1449027	1549605	1534228	1305647	1295639	967120	2114677	1431248	1448994	1099408	1078532	CPD-11940	CPD-11940 [ C15 H14 O5, tgt=66.15, overall=66.15 ]			(257.07892, 20838.174)(258.08206, 1581.0634)(295.13007, 51647.54)(296.1331, 9423.337)(297.1369, 430.6)	16.167
CPD-12266	80411	1	1	1	1	1	76682	1	1	1	1	1	84756	1	92629	92267	1	1	121383	87009	97615	91938	1	1	143893	98075	1	1	1	1	CPD-12266	CPD-12266 [ C3 H9 N O5 P, tgt=37.05, overall=37.05 ]			(175.03485, 9766.4)(153.0095, 414.46)(188.0534, 2153.9902)(170.04395, 4938.683)	2.0756
CPD-17592	3439102	3342505	2189559	2199908	2666219	2635682	4120892	4160889	2693285	2712719	4451672	3294645	4753896	4818590	3260315	3258805	3628637	3592149	4391577	4357562	5268134	5300641	5269795	5248439	4700030	4700942	4487391	4378373	3686387	3675781	CPD-17592	CPD-17592 [ C20 H22 O7, tgt=56.27, overall=56.27 ]			(374.13998, 227647.34)(375.14243, 34791.797)(376.1438, 4707.67)(375.16055, 11646.281)(376.1673, 3286.5571)(377.17395, 268.93002)	8.05447
CPD-17593	1000073	833368	202309	11879052	12059479	895336	13043041	1153987	905031	917937	1118894	13422422	10959065	1	944965	938074	1570887	776180	1952630	819466	605854	594914	962786	940459	11356998	871059	10769821	1239862	1009791	1270050	CPD-17593	CPD-17593 [ C21 H24 O7, tgt=45.26, overall=45.26 ]			(388.2991, 40478.836)(389.15805, 6356.0713)(370.1504, 589.69)(389.66235, 1111.095)(371.60355, 17411.674)(372.14603, 2647.017)(373.1423, 638.615)(409.9955, 8140.237)(411.18927, 3661.4224)(391.62445, 3458.751)(390.17114, 310.05252)(414.15363, 6371.5215)(416.15558, 193.255)(395.1269, 1312.5886)	6.24203
CPD-17594	1495194	1456620	1556561	1595527	1525993	1548580	2611587	1763147	1961410	1961354	1436343	1409688	2444485	1701430	1519417	1503834	1527549	1529249	2238434	1526466	1225682	1242298	1724210	1701901	2321693	1633986	1886927	1922161	1543644	1532732	CPD-17594	CPD-17594 [ C22 H26 O7, tgt=71.27, overall=71.27 ]			(388.75192, 3368.696)(389.1779, 3791.98)(408.07135, 2024.0449)(389.17694, 3979.9268)(406.2032, 95794.87)(407.2051, 15553.031)(425.15268, 58617.715)(426.15625, 9220.518)(409.3573, 56669.21)(411.67947, 80201.76)(412.16223, 23011.527)	5.0258
CPD-17595	432205	179954	171944	173016	171977	135217	604282	150817	156167	161660	614717	584754	743950	140689	120052	535781	123320	157200	190842	489930	136422	146491	284881	135560	251454	604138	166769	172197	120644	202166	CPD-17595	CPD-17595 [ C22 H24 O7, tgt=47.15, overall=47.15 ]			(401.1553, 3915.7244)(386.1504, 1611.845)(401.16956, 3041.365)(388.15512, 1280.6912)(420.25497, 11617.1455)(420.19003, 2343.4546)(401.1733, 5011.3594)(425.15088, 3492.5242)(427.7287, 1729.6499)(427.86597, 1317.7687)(406.1339, 3248.5989)	6.50167
CPD-17598	1	5705871	605820	5605580	5544315	5623610	4746303	4364157	5266969	5214543	6288392	5148498	5218087	4651289	4912932	4871252	3817630	3866930	200912	3932717	3544518	316568	4418337	223998	5504150	4772462	1	4863840	4122248	4057855	CPD-17598	CPD-17598 [ C20 H18 O6, tgt=59.87, overall=59.87 ]			(359.1251, 1507.61)(360.12402, 10773.766)(375.4827, 6803.36)(375.142, 1446.2)(355.1342, 11871.853)(356.6995, 1678.1084)(357.14963, 2758.5618)(381.10944, 1804.08)	9.44829
CPD-17599	623426	608337	552454	773105	769570	233942	1534829	1001013	362098	911476	1055973	1024525	1578236	1	1047270	156752	199098	204362	236751	109783	1292504	173290	171655	1137596	1449014	990819	663652	843553	1083830	1079937	CPD-17599	CPD-17599 [ C21 H22 O6, tgt=57.49, overall=57.49 ]			(371.09515, 19152.488)(372.14624, 1609.4825)(373.6472, 1300.2078)(374.1558, 1382.93)(354.20233, 2375.7834)(357.1465, 8571.733)(375.43924, 9109.243)(372.145, 2297.64)(373.1419, 534.14)(357.14813, 4992.32)(371.93372, 4751.1196)(373.1774, 9758.299)(395.1261, 3514.1797)(378.13498, 2292.6865)	5.1211
CPD-4743	1760764	1688872	1666300	1643898	1639730	1610293	1638464	1494498	1752271	1736768	1862493	1887481	1955528	1780591	1761324	1774142	1617331	1604351	2031035	1859773	1639025	271762	260192	232374	2258699	2070000	1909883	1882484	1778900	1736046	CPD-4743	CPD-4743 [ C15 H24 O2, tgt=44.43, overall=44.43 ]			(259.1635, 4812.88)(219.1714, 8754.45)(237.1817, 5243.2866)(241.1527, 57310.68)(242.1555, 6180.071)	3.4791
12-DIHYDROVOMILENINE	490136	458442	517767	514575	478975	459215	457138	421764	608956	594799	371146	530815	567297	511634	331262	442576	279973	275456	457925	426289	376083	387783	438852	428427	687254	601143	574841	568726	348125	399343	12-DIHYDROVOMILENINE	12-DIHYDROVOMILENINE [ C21 H24 N2 O3, tgt=44.35, overall=44.35 ]			(354.18597, 5805.2695)(355.1885, 510.35498)(336.17566, 450.49902)(353.19226, 24400.24)(354.19525, 3600.0085)(376.43512, 7255.2)(376.1655, 3207.0984)(357.14825, 3481.0671)	5.60483
CPD-4745	124378	120435	90672	84909	100859	100252	95126	97786	82006	84206	405919	423288	126871	118342	99235	108354	96174	97883	130101	113042	94930	98053	112743	116170	157433	143920	93890	105376	234799	229124	CPD-4745	CPD-4745 [ C14 H22 O2, tgt=10.37, overall=10.37 ]			(223.16689, 6631.4443)(224.17001, 1051.28)(222.19086, 3803.8308)(245.15752, 3559.7751)(227.13704, 3914.0974)	6.73303
CPD-4746	1	1	101821	112830	88446	99287	115529	107780	104784	1	105778	116463	212567	141366	1	1	1	78879	119210	1	140725	128078	1	1	136575	118555	93353	93866	176005	1	CPD-4746	CPD-4746 [ C15 H26 O3, tgt= ]			(237.1826, 7672.3047)(259.1646, 4296.8643)	14.2373
SALICYLALDEHYDE	122376	115360	1	1	1	1	149095	113273	134874	1	1	1	1	139338	1	1	145399	157646	236419	209292	219084	206163	180465	167378	200066	181329	99336	1	2039866	155496	SALICYLALDEHYDE	SALICYLALDEHYDE [ C7 H6 O2, tgt=46.05, overall=46.05 ]			(124.03863, 2963.0168)(123.045494, 9744.759)(129.0194, 69238.836)(130.0236, 5730.61)	2.13086
CPD-9800	14850815	14119067	23704856	23755846	19834120	19287880	14409289	13045000	17468172	17219544	19789700	19508340	15754786	14437503	19523572	19449472	13502110	13372943	17783940	16419324	17114126	16824720	14583486	14481642	13484172	12365471	8522589	8336003	17093724	16999498	CPD-9800	CPD-9800 [ C9 H8 O4, tgt=93.85, overall=93.85 ]			(181.04787, 9313.677)(163.0383, 519782.94)(164.04105, 41876.07)(165.04315, 2566.2888)	8.4534
CPD-6886	305322	115225	328872	332656	298299	299127	172107	318844	547517	522665	434487	418520	504545	423951	366170	366243	314773	311116	431760	343402	169203	270600	400531	396408	411671	341707	389699	387970	305276	309319	CPD-6886	CPD-6886 [ C13 H7 O6, tgt=18.95, overall=18.95 ]			(259.0273, 6322.848)(260.02896, 499.54114)(261.02554, 519.54224)(243.0151, 183.4)(263.0469, 159.56)(277.0641, 5465.2896)(287.02164, 4342.3022)	2.1206
CPD-10244	1097705	215939	156929	816038	895495	898809	292462	194153	973639	962297	247827	209079	412921	1157727	1264249	227635	411729	418126	1562182	1412241	312191	1412475	448949	1126558	371636	316070	245442	985270	1331546	384083	CPD-10244	CPD-10244 [ C22 H31 O2, tgt=21.36, overall=21.36 ]			(327.6506, 9966.24)(309.21808, 1311.5028)(328.2442, 10244.765)(329.24683, 136.56)(345.27057, 581.45996)(330.25958, 1311.5458)(350.21356, 45405.8)(351.21625, 5661.5415)(335.21503, 12707.491)(336.2186, 1129.8015)	10.4935
CPD-4748	1607041	1540433	1650352	1657525	1585132	1598488	1509723	1539298	134507	144207	1866400	1896456	1735152	1741400	1673334	1686282	1832031	1799530	1639960	1709681	1974179	1962869	1436593	1304257	1686263	1705855	1407002	1392812	1792463	1783862	CPD-4748	CPD-4748 [ C4 H9 N O2, tgt=53.07, overall=53.07 ]			(105.06905, 4245.444)(106.0726, 239.81)(121.10032, 37402.41)(122.10347, 1893.9749)	15.9614
CPD-6884	305322	115225	328872	332656	298299	299127	172107	318844	547517	522665	434487	418520	504545	423951	366170	366243	314773	311116	431760	343402	169203	270600	400531	396408	411671	341707	389699	387970	305276	309319	CPD-6884	CPD-6884 [ C13 H7 O6, tgt=18.95, overall=18.95 ]			(259.0273, 6322.848)(260.02896, 499.54114)(261.02554, 519.54224)(243.0151, 183.4)(263.0469, 159.56)(277.0641, 5465.2896)(287.02164, 4342.3022)	2.1206
CPD-6885	305322	115225	328872	332656	298299	299127	172107	318844	547517	522665	434487	418520	504545	423951	366170	366243	314773	311116	431760	343402	169203	270600	400531	396408	411671	341707	389699	387970	305276	309319	CPD-6885	CPD-6885 [ C13 H7 O6, tgt=18.95, overall=18.95 ]			(259.0273, 6322.848)(260.02896, 499.54114)(261.02554, 519.54224)(243.0151, 183.4)(263.0469, 159.56)(277.0641, 5465.2896)(287.02164, 4342.3022)	2.1206
CPD-9807	230648	193806	1	1	1	1	281149	190974	1	1	1	1	119370	109507	1	1	1	1	85822	1	1	1	1	1	120880	248223	138043	118011	1	1	CPD-9807	CPD-9807 [ C10 H10 O5, tgt=42.06, overall=42.06 ]			(233.03989, 2659.401)(213.06218, 11038.704)(214.0638, 372.71)(215.03763, 2680.978)	1.894
CPD-9803	230648	193806	1	1	1	1	281149	190974	1	1	1	1	119370	109507	1	1	1	1	85822	1	1	1	1	1	120880	248223	138043	118011	1	1	CPD-9803	CPD-9803 [ C10 H10 O5, tgt=42.06, overall=42.06 ]			(233.03989, 2659.401)(213.06218, 11038.704)(214.0638, 372.71)(215.03763, 2680.978)	1.894
CPD-6041	1933395	1904695	1867944	1298936	1618188	1617320	2323193	2075140	1996024	167503	2738345	2728772	3186721	1892429	1858441	1875028	672560	661495	210909	211761	224004	230021	243654	243296	2503303	3194336	2293976	1	3138195	3133867	CPD-6041	CPD-6041 [ C20 H20 N8 O5, tgt=47.21, overall=47.21 ]			(453.60248, 10960.957)(454.1636, 2229.8716)(438.9501, 125.22201)(439.1521, 435.81998)(473.37912, 1103.965)(475.20987, 116.12333)(457.19684, 157.016)(475.15326, 2054.6357)(476.1702, 109.83)(457.14267, 30825.861)(458.3719, 3648.833)(459.1442, 617.395)	8.54777
S-STYLOPINE	516515	5554133	5225475	5197956	5216176	358563	4701169	4645182	403645	380148	1686191	5852864	5165417	5038812	305414	308939	338436	352633	198261	1329287	1359138	1335170	1239672	357182	1493067	1410381	1254861	1265939	548681	5130626	S-STYLOPINE	S-STYLOPINE [ C19 H17 N O4, tgt=44.26, overall=44.26 ]			(323.10663, 8487.24)(327.1388, 1631.1466)(309.12903, 1621.0345)(344.1676, 489895.72)(345.17014, 74923.805)(325.64316, 1463.2393)(327.15485, 3538.891)(328.1586, 228.39)(346.1696, 86065.62)(347.10028, 17837.598)(348.1014, 1133.138)(330.09137, 300.88)	11.2322
CPD-4754	480101	464073	401776	387528	417302	426617	347187	351094	556145	538202	487415	514161	473109	482523	490107	499729	534277	532384	345744	359894	416631	410279	277976	258545	442644	464450	312082	299626	417708	416319	CPD-4754	CPD-4754 [ C20 H32, tgt=73.15, overall=73.15 ]			(273.255, 27437.871)(274.258, 4363.579)	12.4872
CPD-10257	1	1	1	1	1	1	1	290145	1	345619	323015	213462	424691	362879	1	1	1	1	230521	1	332422	350755	1	1	353005	300557	1	1	1	311122	CPD-10257	CPD-10257 [ C22 H32 O2, tgt=10.39, overall=10.39 ]			(328.24414, 9097.598)(329.24734, 222.83667)(330.259, 1522.39)(330.2605, 266.86)(336.219, 644.045)	13.1796
CPD-10255	107033	102937	1	1	1	1	173142	145977	1	1	1	1	135088	113180	1	1	1	1	1	1	159259	164127	1	1	122461	121824	1	1	1	1	CPD-10255	CPD-10255 [ C37 H56 N7 O17 P3 S, tgt=21.58, overall=21.58 ]			(998.27686, 7215.486)(999.27747, 6895.172)(1000.27625, 6167.154)(1001.2736, 3611.95)(1002.2736, 767.51666)	25.6628
CPD-10254	2603842	2497612	1628707	1643197	1918174	2024143	2317371	2243788	1403989	1376733	1176484	1154584	2270836	2258831	1354561	1366443	1088146	1121498	1809374	1805400	2164476	2233771	1419229	1402410	2425751	2367881	1634477	1611605	1115447	1087018	CPD-10254	CPD-10254 [ C37 H58 N7 O17 P3 S, tgt=45.16, overall=45.16 ]			(980.26794, 27224.002)(981.2689, 25928.363)(982.26746, 23915.031)(983.2665, 11998.53)(984.2648, 5142.702)(985.2624, 1436.017)	28.5696
CPD0-954	104308	95302	107961	110007	97777	106150	125275	117650	141833	136980	1	1	103641	100709	100310	101758	1	1	1	1	1	1	1	1	87912	89674	101669	94571	1	1	CPD0-954	CPD0-954 [ C10 H6 O2, tgt=47.62, overall=47.62 ]			(159.04265, 6790.816)(181.08412, 524.07263)(163.07353, 10352.017)	5.517
CPD-4752	480101	464073	401776	387528	417302	426617	347187	351094	556145	538202	487415	514161	473109	482523	490107	499729	534277	532384	345744	359894	416631	410279	277976	258545	442644	464450	312082	299626	417708	416319	CPD-4752	CPD-4752 [ C20 H32, tgt=73.15, overall=73.15 ]			(273.255, 27437.871)(274.258, 4363.579)	12.4872
CPD-4753	480101	464073	401776	387528	417302	426617	347187	351094	556145	538202	487415	514161	473109	482523	490107	499729	534277	532384	345744	359894	416631	410279	277976	258545	442644	464450	312082	299626	417708	416319	CPD-4753	CPD-4753 [ C20 H32, tgt=73.15, overall=73.15 ]			(273.255, 27437.871)(274.258, 4363.579)	12.4872
CPD-4751	480101	464073	401776	387528	417302	426617	347187	351094	556145	538202	487415	514161	473109	482523	490107	499729	534277	532384	345744	359894	416631	410279	277976	258545	442644	464450	312082	299626	417708	416319	CPD-4751	CPD-4751 [ C20 H32, tgt=73.15, overall=73.15 ]			(273.255, 27437.871)(274.258, 4363.579)	12.4872
CPD-684	480101	464073	401776	387528	417302	426617	347187	351094	556145	538202	487415	514161	473109	482523	490107	499729	534277	532384	345744	359894	416631	410279	277976	258545	442644	464450	312082	299626	417708	416319	CPD-684	CPD-684 [ C20 H32, tgt=73.15, overall=73.15 ]			(273.255, 27437.871)(274.258, 4363.579)	12.4872
CPD2GG-5240	240080	222594	305636	300517	281883	256428	193391	185510	250666	248150	180957	210654	1	1	1	1	1	84063	1	1	83057	1	1	104605	105259	95585	1	1	1	85581	CPD2GG-5240	CPD2GG-5240 [ C30 H46 O6, tgt=35.03, overall=35.03 ]			(502.31686, 6334.06)(484.3047, 366.87)(487.3329, 395.52)(527.9987, 8666.289)(527.32916, 744.6477)(509.3054, 531.35095)	8.0005
ALLOCRYPTOPINE	765820	3189099	76797	90178	1658852	3581169	1	3881686	974835	945967	3832713	785166	138005	1112600	992089	1011984	1119144	1122506	1082850	1050468	1002832	4603511	4574377	4557030	2192504	1492365	88247	1587572	193172	189536	ALLOCRYPTOPINE	ALLOCRYPTOPINE [ C21 H23 N O5, tgt=57.07, overall=57.07 ]			(370.70377, 6237.756)(370.1501, 898.5675)(353.32175, 1548.8633)(355.16656, 4697.8623)(372.43918, 5043.477)(373.16418, 604.9717)(374.17703, 26295.658)(375.18002, 2438.2268)(352.27368, 15468.237)(353.3746, 2447.599)(355.1674, 9617.53)(387.19498, 16726.967)(388.20065, 10509.103)(389.20312, 2249.5425)(369.1859, 6026.3774)(370.1902, 1062.2367)(392.2798, 5078.706)(374.14093, 66685.37)(375.14297, 31524.…	6.45333
CPD-695	3249475	3125428	2047415	2030171	2563587	2543363	289883	1	1	1	1	1	1	3227787	4926875	4824957	1	1	508678	511693	1	1	1	503232	6857166	6635192	5297868	5295361	4434778	1	CPD-695	CPD-695 [ C20 H26 O5, tgt=39.01, overall=39.01 ]			(346.6256, 1871.1244)(328.1596, 102079.86)(329.1611, 15659.123)(330.16415, 473.56)(331.18347, 4282.9136)(332.18695, 1351.46)(365.22458, 3509.0725)(372.1767, 1066.0085)(351.1465, 3832.54)	14.8198
ETHIONINE	805342	774448	1310457	1321398	1023542	1261947	1731330	1654260	1837288	1838025	2076497	2123826	1814738	1495978	2024156	2022174	1931717	1893779	2149783	2116449	1871024	1887290	2014890	1662205	2751571	2679738	1573741	1555959	1993105	1991424	ETHIONINE	ETHIONINE [ C6 H13 N O2 S, tgt=47.29, overall=47.29 ]			(146.05875, 33037.22)(146.20958, 27855.703)(147.06187, 2522.0674)(184.0952, 330.30502)(167.06885, 977.445)(169.04799, 4104.6455)(165.08934, 2859.0298)(166.08519, 320.48145)	4.295
KYNURENATE	129261	106613	1	1	84623	83331	123784	93502	1	1	1	1	166437	118894	1	1	1	1	107231	1	81853	86282	1	1	116651	108648	1	1	1	1	KYNURENATE	KYNURENATE [ C10 H5 N O3, tgt=55.19, overall=55.19 ]			(191.03702, 1668.0721)(188.03734, 8083.7285)(189.04216, 880.0525)(175.03543, 10113.277)	1.4026
L-PANTOATE	367535	369655	654130	666956	508993	498660	624005	625352	723310	720172	782893	807712	790234	800081	827039	830496	701313	693327	814139	812388	761505	745994	799274	785395	1023429	1023517	505159	509037	765256	764650	L-PANTOATE	L-PANTOATE [ C6 H11 O4, tgt=43.92, overall=43.92 ]			(147.06169, 4560.7207)(133.06375, 308.97)(153.08942, 673.81775)(130.064, 6380.1987)(149.09476, 452.91373)(170.0585, 20841.104)(171.06175, 1015.5873)	4.2966
O-UREIDOHOMOSERINE	86424	460699	555870	453667	623358	574784	315781	484066	94331	96196	409644	267747	1514599	1537414	565364	100331	859583	877048	93485	89951	1	537692	508945	636430	107283	626024	89185	925602	190472	171145	O-UREIDOHOMOSERINE	O-UREIDOHOMOSERINE [ C5 H11 N3 O4, tgt=75.36, overall=75.36 ]			(180.62067, 10084.609)(181.08609, 3233.6099)(163.07281, 6711.7515)(164.0704, 835.1779)(180.28506, 44462.46)(181.08754, 3130.8638)(162.40729, 1400.0723)(197.29991, 10544.272)(198.11862, 1327.0753)(179.10493, 2155.398)(182.05133, 598.75366)(183.0474, 774.65)	6.58227
CPD-659	724506	733672	689597	939702	830825	840728	1362798	1153394	1032081	1022191	1053857	1217366	1365839	1177839	1298001	1318527	1417318	2003926	1762062	1253500	1723294	1685913	1191970	1610860	1210994	1117886	905194	901634	1263123	1242766	CPD-659	CPD-659 [ C10 H12 N O5, tgt=57.31, overall=57.31 ]			(245.11436, 772.41504)(227.10411, 3110.2676)(249.05833, 25047.1)(250.06131, 4033.0613)(251.05328, 702.945)(231.04802, 32103.096)(232.05176, 1757.9773)	9.1366
CPD-20125	2270644	2192085	2483752	2471217	2299798	2310091	2675792	2157880	2544945	2596989	2291969	2370403	2800384	2557545	2589942	2622830	2286066	2280429	2842738	2542694	2508255	2465683	2504941	2423973	2731938	2401578	2617978	2526030	2147129	2552059	CPD-20125	CPD-20125 [ C6 H9 O8 P, tgt=20.52, overall=20.52 ]			(241.00333, 196312.31)(242.00414, 55252.855)	1.3974
DELTA3-ISOPENTENYL-PP	722725	707852	719050	243954	671468	691531	797636	355086	234331	765063	753657	689953	853645	788370	236163	242373	666349	662023	903208	818379	814663	458770	851172	831338	831684	744255	782387	744627	197892	744595	DELTA3-ISOPENTENYL-PP	DELTA3-ISOPENTENYL-PP [ C5 H9 O7 P2, tgt=45.99, overall=45.99 ]			(242.98836, 15852.118)(243.9916, 275.41)(227.6531, 14891.315)(264.5522, 3580.5742)(243.43103, 46308.312)(244.24358, 8038.554)(244.99945, 2983.4827)(251.76985, 782.95996)(252.9704, 414.28)	1.3998
CPD-670	3311795	3199274	2045779	2075681	2639318	2628555	2940239	3199926	2971108	2934953	2621795	2609931	1700964	1774415	2434203	2511077	2447615	2462633	2456641	2496588	2529947	2506406	2557055	2555520	3202538	3432776	3906936	3796930	3450794	3472686	CPD-670	CPD-670 [ C6 H9 N3 O2, tgt=85.73, overall=85.73 ]			(137.0589, 106900.54)(138.06192, 6858.4966)(163.05846, 1040.4146)	7.8962
CPD-6001	220364	222475	272973	266275	269975	226574	229156	206689	254144	246170	1	1	229618	181117	1	178060	1	1	250491	1	1	1	1	1	342717	257657	219478	195329	1	1	CPD-6001	CPD-6001 [ C5 H10 O5, tgt=43.80, overall=43.80 ]			(150.0539, 7047.5386)(151.0603, 144.185)(137.05736, 4852.0947)(137.05939, 5802.113)(168.0904, 738.69995)	2.3134
CPD-674	467844	455007	598240	598278	522730	512943	303409	1	1	1	1	346599	1	1	1	1	1	1	1	277563	1	318715	1	1	260302	258154	1	1	1	1	CPD-674	CPD-674 [ C9 H7 O2, tgt=52.94, overall=52.94 ]			(147.04222, 7512.3984)(148.05045, 1582.04)(148.05037, 3072.6067)(149.05783, 216.54797)	9.224
CPD-669	1369593	1259508	1222056	628920	1215682	1224040	1178266	1136750	1307071	1281657	1396555	1318406	1386666	1338152	1387901	1384988	1378751	1385222	1340082	1295139	1	1081229	1373117	1357969	1367994	1335534	1318143	1321989	1376924	1350379	CPD-669	CPD-669 [ C13 H18 N6 O3, tgt=46.47, overall=46.47 ]			(309.1634, 1270.0747)(312.16147, 3347.5227)(307.1657, 59045.4)(308.16806, 7080.378)	3.9982
OXALACETIC_ACID	515243	517256	223403	288212	320693	330374	451626	436253	218881	261549	244107	166471	566428	389151	227808	216602	237640	225470	350293	212025	378996	326245	242800	206394	390171	362518	190599	195199	193491	161576	OXALACETIC_ACID	OXALACETIC_ACID [ C4 H2 O5, tgt=46.41, overall=46.41 ]			(129.99312, 28853.062)(130.99878, 890.365)(115.7878, 1456.3821)(130.99936, 994.192)(116.99444, 1418.9929)(153.03827, 1035.7614)	1.3964
CPD2GG-5257	1	1	1	1	1	1	205070	192048	1	1	1	1	382735	368350	366946	355373	864777	855567	473785	454540	736546	711277	293373	270804	201829	193300	184052	175549	203662	191843	CPD2GG-5257	CPD2GG-5257 [ C54 H86 O25, tgt= ]			(1157.5317, 15240.602)(1158.5339, 4130.1475)(1159.531, 586.655)	22.5744
CPD-14406	111768	102909	124450	114676	102607	104871	173822	239632	146990	150624	1	166131	137893	267290	216655	215217	250839	267202	166260	235618	253596	229591	211644	203239	106293	325641	185584	202280	254890	238216	CPD-14406	CPD-14406 [ C41 H62 N7 O17 P3 S, tgt=45.79, overall=45.79 ]			(1050.3113, 5156.292)(1051.3143, 2746.9238)	9.187
2-TRANS6-TRANS-FARNESAL	1599694	1548276	2428692	2396259	1953895	1944129	2090042	2060672	3114120	3030517	2262910	2367710	3041637	2805200	2596052	2571227	2869631	2975056	2452942	2374854	2622698	2649314	1	2109538	2370260	2207796	1897875	1891152	2140658	2152033	2-TRANS6-TRANS-FARNESAL	2-TRANS6-TRANS-FARNESAL [ C15 H24 O, tgt=69.83, overall=69.83 ]			(221.18784, 15101.732)(222.19096, 1013.4632)(203.17793, 86202.69)(204.18082, 11153.496)	10.6462
CPD-14405	116515	103780	1	1	1	1	106174	145644	88738	87229	105976	100818	147924	166320	135111	131463	153412	165797	100657	143641	155790	139691	129689	125938	161049	201849	112792	123140	156853	145703	CPD-14405	CPD-14405 [ C41 H64 N7 O18 P3 S, tgt=27.20, overall=27.20 ]			(1050.3107, 5700.6763)(1051.3137, 3283.6055)(1072.296, 4951.0977)(1073.2969, 5031.577)	13.7443
CPD-14407	82532	75164	1	1	1	1	141403	121680	1	1	1	1	106160	1	1	1	1	1	1	1	1	154966	1	1	119005	109401	1	1	1	1	CPD-14407	CPD-14407 [ C41 H64 N7 O17 P3 S, tgt=11.56, overall=11.56 ]			(1074.2947, 5630.088)(1075.2944, 2696.9387)(1076.29, 951.05505)	26.2814
CPD-13370	2783382	2749806	1619250	1582688	2190195	2169651	2678721	2835661	2534434	2474338	2140968	2176180	1388706	1402983	1970288	2032269	2020529	1999031	2179039	2173078	2152603	2112961	2187015	2179992	3000708	3091377	3598634	3459897	3049492	3069226	CPD-13370	CPD-13370 [ C9 H10 O2, tgt=94.45, overall=94.45 ]			(150.06612, 2056.9546)(151.0733, 284.38)(151.07373, 1150.6492)(133.06407, 105339.89)(134.06718, 8350.923)(135.0789, 366.8)(177.06746, 1232.3365)	7.8946
CPD-13373	1256980	1198310	1542681	1539087	1326482	1314260	1809587	1691805	3342767	3289126	2770866	2780246	1728371	1596597	1722534	1721852	932484	949901	1332116	1274456	915415	906286	1487585	1511571	698977	657760	1093773	1090446	739495	737064	CPD-13373	CPD-13373 [ C19 H22 O2, tgt=56.82, overall=56.82 ]			(283.17236, 35316.6)(284.17535, 3081.5413)(300.19852, 29737.504)(301.20145, 2913.1624)(302.19336, 663.05)(305.15427, 11329.783)(306.15582, 547.505)	3.4984
CPD-14420	111768	102909	124450	114676	102607	104871	173822	239632	146990	150624	1	166131	137893	267290	216655	215217	250839	267202	166260	235618	253596	229591	211644	203239	106293	325641	185584	202280	254890	238216	CPD-14420	CPD-14420 [ C41 H62 N7 O17 P3 S, tgt=45.79, overall=45.79 ]			(1050.3113, 5156.292)(1051.3143, 2746.9238)	9.187
CPD-14425	260817	233407	2627062	2581483	2757367	2830295	422369	374936	2430417	2338166	2135261	2073182	321271	2939298	2304218	2340328	2005878	2049694	2720400	2707649	2900046	471777	2492586	2457658	363004	344505	2557241	2559589	2081555	2043247	CPD-14425	CPD-14425 [ C43 H62 N7 O17 P3 S, tgt=11.14, overall=11.14 ]			(1073.2959, 5680.3174)(1055.2871, 30242.35)(1074.2947, 5520.1953)(1075.2944, 2641.7815)(1076.29, 911.975)(1056.286, 29253.967)(1057.285, 16899.393)(1058.2827, 7404.7207)(1059.2806, 2260.4072)(1060.2769, 168.67)	28.395
CPD-14424	142505	128629	1	1	1	1	235285	206379	1	1	1	1	178123	172488	1	1	1	1	1	1	256005	261950	1	1	200282	190389	1	1	1	1	CPD-14424	CPD-14424 [ C43 H64 N7 O18 P3 S, tgt=11.14, overall=11.14 ]			(1073.2957, 5908.957)(1074.2944, 5754.77)(1075.294, 2747.7542)(1076.2904, 891.13995)	26.2821
CPD-14423	116515	103780	1	1	1	1	183698	167271	1	1	1	1	147924	134594	1	1	1	1	1	1	205498	210617	1	1	161049	154234	1	1	1	1	CPD-14423	CPD-14423 [ C43 H62 N7 O18 P3 S, tgt=49.38, overall=49.38 ]			(1072.2948, 5543.3394)(1073.2957, 5764.6006)(1074.2944, 5619.5723)(1075.294, 2680.936)(1076.2904, 847.9467)	26.2822
CPD-14419	116515	103780	1	1	1	1	106174	145644	88738	87229	105976	100818	147924	1	1	1	1	1	100657	143641	155790	139691	129689	125938	161049	1	1	1	1	1	CPD-14419	CPD-14419 [ C41 H64 N7 O18 P3 S, tgt=27.20, overall=27.20 ]			(1050.3094, 5324.5806)(1051.3127, 2936.4883)(1072.296, 4951.0977)(1073.2969, 5031.577)	19.441
CPD0-1240	186926	183514	211896	206870	192569	194022	193982	192098	262377	257364	189048	189512	223524	224585	186794	192896	158562	165635	167096	171989	127835	129076	185451	182348	197625	196281	208458	208625	174035	171353	CPD0-1240	CPD0-1240 [ C6 H14 F N2 O2, tgt=57.14, overall=57.14 ]			(167.10489, 3537.513)(149.09503, 72058.98)(150.09805, 5381.4897)(165.12578, 10854.609)(191.10492, 19989.357)(192.10779, 1410.0815)(173.09439, 730.0347)	5.0164
CPD0-1245	787843	710836	651412	605965	650089	654810	1808099	766549	612777	589227	571749	598457	1581281	704562	694283	671964	827367	740549	1670829	658323	627347	623089	667017	600289	774992	600724	546925	536196	647888	646124	CPD0-1245	CPD0-1245 [ C5 H11 N O5 P, tgt=66.81, overall=66.81 ]			(200.7273, 12729.801)(201.04276, 15236.01)(183.88216, 1387.2894)(184.0482, 594.62)(215.07419, 1776.3293)(219.02487, 36272.504)(220.0277, 703.5396)	1.5036
CPD0-1244	2730974	2648872	2825126	2773548	2622927	2606594	1913434	5106074	1685888	4484028	5152464	1819874	3603672	3540414	1645475	5386386	1677172	1685364	7532104	7392946	7276858	7174996	7134984	7080797	8937873	2267839	1510249	1463701	2275607	2254399	CPD0-1244	CPD0-1244 [ C25 H33 N3 O3 S2, tgt=80.48, overall=80.48 ]			(474.1717, 310.945)(506.23282, 78680.16)(507.2354, 19039.906)(508.2372, 3709.2585)(509.22885, 1454.315)(511.18863, 122950.984)(512.1911, 28648.092)(513.19196, 4090.9792)	12.379
CPD-14431	303032	1	1	1	1	1	1	1	1	1	1	1	1	128325	156420	158070	180863	169436	1	1	1	1	1	1	203449	1	1	1	1	1	CPD-14431	CPD-14431 [ C15 H16 O9, tgt=38.36, overall=38.36 ]			(340.08423, 6908.864)(341.08014, 2335.0728)(359.12363, 4101.39)(361.1215, 14955.844)	3.08064
CPD-14430	1	194173	133131	145072	160499	159420	144379	1	170481	163767	132499	115255	193163	161851	140010	134420	101210	100830	227003	172916	201457	197024	146986	135790	151125	116676	114798	139968	127245	138377	CPD-14430	CPD-14430 [ C10 H8 O4, tgt=45.80, overall=45.80 ]			(217.13626, 1116.5209)(175.03539, 6635.241)(176.03723, 524.9408)(211.07974, 1015.4025)(197.0604, 332.925)(192.06386, 7335.143)	1.62404
CPD-10894	163903	158313	146027	145111	143997	149676	1	1	1	1	1	1	1	1	1	1	1	1	1	1	1	1	1	1	120982	1	1	1	1	1	CPD-10894	CPD-10894 [ C15 H6 O19 S4, tgt=21.98, overall=21.98 ]			(637.8647, 9483.724)(638.8673, 746.54)	12.97
CPD-14434	303032	1	1	1	1	1	1	1	1	1	1	1	1	128325	156420	158070	180863	169436	1	1	1	1	1	1	203449	1	1	1	1	1	CPD-14434	CPD-14434 [ C15 H16 O9, tgt=38.36, overall=38.36 ]			(340.08423, 6908.864)(341.08014, 2335.0728)(359.12363, 4101.39)(361.1215, 14955.844)	3.08064
4-AMINO-BUTYRATE	1607041	1540433	1650352	1657525	1585132	1598488	1509723	1539298	1	1	1866400	1896456	1735152	1741400	1673334	1686282	1832031	1799530	1639960	1709681	1974179	1962869	1436593	1304257	1686263	1705855	1407002	1392812	1792463	1783862	4-AMINO-BUTYRATE	4-AMINO-BUTYRATE [ C4 H9 N O2, tgt=53.07, overall=53.07 ]			(105.069046, 3082.5645)(121.10034, 39663.6)(122.10347, 1893.9749)	16.5214
CPD0-1251	5241984	5041315	1	1	3896873	3815406	5247194	5232904	4307112	4232005	3664470	3615872	1	1	3472220	3413558	3871906	3846930	4036223	4082697	3963390	3941616	3921565	3934165	5757245	5695045	6579200	6505471	5560596	5504536	CPD0-1251	CPD0-1251 [ C15 H15 N6 O3, tgt=8.68, overall=8.68 ]			(327.13885, 1755.4751)(351.1574, 22563.316)(352.11734, 1450.6571)	7.89431
CPD-14428	303032	1	1	1	1	1	1	1	1	1	1	1	1	128325	156420	158070	180863	169436	1	1	1	1	1	1	203449	1	1	1	1	1	CPD-14428	CPD-14428 [ C15 H16 O9, tgt=38.36, overall=38.36 ]			(340.08423, 6908.864)(341.08014, 2335.0728)(359.12363, 4101.39)(361.1215, 14955.844)	3.08064
CPD0-1252	2354389	2217820	3041833	3007371	2564474	2583198	2403590	2366028	4267843	4236642	2481579	2379504	2069937	2005275	2966100	2940255	1983445	2007926	1601696	1552629	960263	936342	2082968	2019531	1498695	1409917	2400071	2325198	1	1	CPD0-1252	CPD0-1252 [ C14 H12 N5 O3 S, tgt=77.03, overall=77.03 ]			(334.78488, 1902.3572)(335.06924, 412.72)(331.07996, 11336.319)(319.07462, 5158.418)(351.10123, 15422.265)(352.10425, 1546.9307)(353.099, 1182.0874)(330.09174, 41616.254)(331.08267, 13537.339)	2.1638
CPD-14429	303032	1	1	1	1	1	1	1	81650	93154	1	1	1	128325	156420	158070	180863	169436	1	1	1	1	1	1	203449	1	1	1	1	1	CPD-14429	CPD-14429 [ C15 H16 O9, tgt=38.36, overall=38.36 ]			(341.1988, 6716.0034)(341.08014, 2335.0728)(323.07068, 5385.615)(359.12363, 4101.39)(361.1215, 14955.844)	2.829
CPD0-1253	275826	270335	299451	318449	1	1	219992	218933	346532	340053	295658	293985	1	273471	244103	243715	229799	225258	211911	1	1	1	1	221146	198591	201250	217855	1	286621	279347	CPD0-1253	CPD0-1253 [ C14 H13 N6 O3, tgt=64.40, overall=64.40 ]			(331.1482, 9493.675)(317.13513, 18380.84)(318.13806, 2536.126)	5.92833
CPD0-1255	487069	1	1	1	1	1	536217	573898	1	1	185308	1	1	1	1	1	1	1	1	1	1	1	164798	1	267133	319962	1	1	1	1	CPD0-1255	CPD0-1255 [ C20 H23 N7 O6, tgt=58.91, overall=58.91 ]			(459.17554, 20178.164)(460.1789, 2281.325)(439.15228, 20585.328)(440.15463, 2823.032)(459.17807, 19215.725)(460.18127, 2042.68)(441.1662, 31657.691)(442.17, 4570.786)(476.2091, 14035.07)(477.21143, 2108.81)(457.19653, 496.245)(481.16486, 5927.015)	4.96478
4-METHYLPENTANAL	2362633	2240253	1396521	1372370	1777156	1759713	2275654	2371874	2174748	1	1824512	1782296	1367967	1392511	1697001	1699046	1705558	1690465	1930106	1918598	1810641	1770586	1876619	1851731	2536495	2535891	2846943	2716957	2376094	2381712	4-METHYLPENTANAL	4-METHYLPENTANAL [ C6 H12 O, tgt=70.83, overall=70.83 ]			(105.069305, 74926.766)(106.07249, 4720.3525)	7.897
PALMATINE	519600	485252	683624	688407	582961	579195	629026	594104	852777	864442	598921	654121	907017	918533	784946	761081	761277	754477	797945	772476	730328	762875	653090	622595	751550	720154	665770	646839	621518	616218	PALMATINE	PALMATINE [ C21 H22 N O4, tgt=63.47, overall=63.47 ]			(353.11792, 4051.2817)(354.64923, 2617.2312)(355.16763, 7074.3457)(354.1717, 3408.78)(355.169, 1527.25)(357.18335, 1233.895)(375.3448, 30448.467)(376.14536, 4562.1035)(357.12946, 941.19)	6.25657
CPD-14445	225377	256990	241913	249333	242245	218286	240227	153759	156947	154571	79264	173869	303315	143347	265243	145092	176874	170242	112492	109783	162474	153298	140036	112739	258059	262796	267770	258615	253996	314059	CPD-14445	CPD-14445 [ C14 H26 N8 S2, tgt=47.60, overall=47.60 ]			(372.5061, 10391.0625)(373.17813, 11769.68)(373.1776, 9964.243)(376.90164, 12354.452)(377.1735, 10148.14)(392.87057, 7948.2236)(393.49136, 1296.7029)(399.15848, 2245.9133)	4.27173
CPD-13396	9418384	9127765	10586392	10349023	9352854	9990194	9876181	9223315	10755192	10647791	672361	11351576	10702454	10895937	10495578	10241005	11195558	11425034	10564437	10450243	11992939	671106	8634457	7996269	10795789	10669489	8654749	8545914	10979255	10765805	CPD-13396	CPD-13396 [ C15 H24, tgt=67.89, overall=67.89 ]			(205.19395, 248927.34)(206.19664, 32715.732)(207.19968, 725.297)	16.5222
CPD-14443	2127781	1318583	451651	365577	494181	488346	316662	615218	593145	414751	9415136	568885	301766	312676	138306	749619	629150	600134	11429176	10001126	9766437	10062520	10229865	11143162	305666	401048	350028	511958	2455987	534776	CPD-14443	CPD-14443 [ C7 H7 N O5, tgt=57.05, overall=57.05 ]			(188.03705, 3501.6306)(169.0332, 341.06)(187.06381, 74793.84)(191.0146, 822.33)	1.458
CPDQT-409	263927	1738010	1728210	117403	193031	1709237	1770245	1725213	85796	1	1988317	2061780	1839687	1793547	1924767	1905846	94709	94454	112863	116592	126383	120620	106183	95726	1809483	1753083	331695	315600	1956621	1959287	CPDQT-409	CPDQT-409 [ C12 H24 N2 O3 S2, tgt=47.08, overall=47.08 ]			(309.12973, 2419.492)(291.11987, 11999.842)(292.1231, 287.68)(327.15536, 6148.263)(328.1587, 459.73138)(309.14417, 6934.605)(310.1509, 3773.0222)(331.10486, 49604.727)(332.10675, 3250.6006)	15.0427
CPDQT-408	1	484830	1214597	1	1	1	146335	731162	579870	572204	3254391	585249	853280	726202	1275295	585391	673947	683802	2724194	2709067	3146093	3138240	2372251	2405652	708616	141220	1007953	1	802515	1	CPDQT-408	CPDQT-408 [ C11H22N2O3S2, tgt= ]			(277.10202, 1905.8121)(316.1357, 9668.43)(295.1288, 735.2628)(317.56622, 17233.742)(318.1005, 732.39557)(301.91837, 33811.16)(301.08987, 10931.115)(302.09155, 992.21747)	6.34977
CPDQT-407	993618	956900	1199601	1185471	1045405	1031658	1082928	960935	1241090	1237005	934055	927863	1070361	919540	974254	982653	930009	934976	898417	1	1	1	918483	879281	933240	816257	1027434	1003494	927879	900385	CPDQT-407	CPDQT-407 [ C10 H20 N2 O3 S2, tgt=58.89, overall=58.89 ]			(286.0875, 593.43)(284.09598, 2312.952)(286.0887, 794.33)(301.12234, 1566.2137)(282.1173, 487.85)(303.08176, 17810.14)(304.08304, 531.0907)(305.07465, 1277.44)(289.06467, 3200.8093)	2.0916
CPD0-1263	1	1	1	1	1	1	1	1	1	1	1	1	1	1	1	1	1	1	1	1	1	1	1	1	89767	1	1	1	1	1	CPD0-1263	CPD0-1263 [ C8 H4 O6, tgt= ]			(178.994, 6457.01)(179.9951, 424.21)	1.447
CPD0-1264	2915916	2815397	2614236	2610330	2690726	2632769	424695	2018882	1933091	920859	2021076	1915786	2478447	2252529	1124118	1133186	876416	874460	2185083	1980133	2163430	2127568	1690823	1620592	1889858	1671317	1689525	1660270	975451	1843762	CPD0-1264	CPD0-1264 [ C8 H12 O4, tgt=72.26, overall=72.26 ]			(177.08841, 1489.7787)(177.0862, 522.2)(191.31754, 1459.2843)(193.1205, 127.55)(177.05441, 38725.875)(178.05672, 3078.9807)(179.0683, 110.48832)	6.36303
6-OXO-HEXANOATE	1	4385703	694558	1941322	2140839	2172246	133914	152657	321096	2712025	1393745	467595	168834	696701	2744815	202794	2765912	2619707	205437	176322	166078	2873480	2609479	2556978	240327	324893	2425767	182839	436258	2409048	6-OXO-HEXANOATE	6-OXO-HEXANOATE [ C6 H9 O3, tgt= ]			(133.06393, 3827.3965)(134.06715, 392.4147)(111.04324, 7050.8467)(130.06401, 2178.2437)(113.76959, 234.57286)(114.05365, 285.015)(149.09482, 4656.6387)(150.09805, 287.54684)(151.0943, 66.47)(130.8742, 2019.441)(131.28499, 1586.5701)(154.0483, 170.10583)(138.19026, 452.59283)(139.04889, 440.77835)	4.2966
CPDQT-406	882963	881306	973847	953262	892906	885171	1065915	885977	1108393	591891	1	737098	478697	518695	1023657	566827	651140	681859	473767	456003	1	494375	547309	536334	956234	772471	782947	768227	697399	671728	CPDQT-406	CPDQT-406 [ C9 H18 N2 O3 S2, tgt=50.50, overall=50.50 ]			(252.23949, 884.5746)(270.07968, 2670.1335)(255.0682, 956.305)(267.09525, 14627.391)(268.1027, 389286.94)(269.10483, 40481.562)(289.31512, 9922.306)(290.07065, 1711.0414)(274.12518, 5041.8774)(272.0595, 2506.05)	3.64233
CPDQT-405	285209	248504	188274	196151	158273	158310	2068601	1933147	294912	156765	166312	91054	382282	276169	137024	191596	1385363	1374892	215526	103262	136986	136417	100365	123145	507392	291135	142338	124834	103706	335665	CPDQT-405	CPDQT-405 [ C8 H17 N O S, tgt=41.17, overall=41.17 ]			(199.09474, 476.71252)(161.0945, 582.31)(179.10535, 4117.987)(178.83302, 4455.649)(181.32341, 30859.557)(182.60739, 2975.0981)(177.32469, 1595.0879)(178.1213, 998.21)	3.386
CPD0-1269	179303	176532	1	1	127468	1	128929	528708	539617	475628	324447	286600	214843	167880	127847	136603	112543	124266	275772	208407	195772	184307	150670	150321	173484	148880	165503	148794	134725	127213	CPD0-1269	CPD0-1269 [ C8 H9 Br O4, tgt=49.84, overall=49.84 ]			(251.04625, 951.677)(251.96983, 560.0843)(252.9702, 283.45)(254.77669, 24641.676)(271.0121, 454.0491)(272.768, 7169.1323)(273.73883, 5402.4404)(273.95358, 3631.0867)	1.38933
CPDQT-404	764865	729869	748333	750999	721441	716517	768886	776155	657468	672776	878986	904221	654183	700315	801621	796901	863034	833654	773205	783351	860678	874269	661527	682999	679576	686621	605342	622776	924754	892017	CPDQT-404	CPDQT-404 [ C8 H17 N O2 S, tgt=47.54, overall=47.54 ]			(192.108, 2051.7349)(211.1294, 1183.4828)(193.12012, 1821.223)(197.07866, 920.2114)	4.8794
CPDQT-420	1907926	1744798	2422017	2418981	2044702	2040925	1555899	1427724	1319383	1349958	3649598	1998026	1931693	1868371	1970724	1969507	1531355	1571765	1616835	1606521	1884246	1934219	2024664	1967635	1394916	1282125	884335	832476	1729214	1702103	CPDQT-420	CPDQT-420 [ C14 H26 N O9 S3, tgt=71.43, overall=71.43 ]			(449.10306, 66225.26)(450.10553, 11876.823)(451.10828, 1086.9149)	6.7554
CPD0-1271	1	1	1	1	1	1	345840	1	1	1	1	1	473114	1	1	1	1	1	1	1	1	1	1	1	393237	1	1	1	1	1	CPD0-1271	CPD0-1271 [ C7 H3 N O5, tgt=47.59, overall=47.59 ]			(183.00429, 525.41)(201.03986, 850.6533)	2.14667
CPD-14453	1	1	133131	145072	1	1	144379	1	170481	163767	132499	115255	193163	161851	140010	134420	101210	100830	227003	172916	201457	197024	146986	135790	151125	116676	114798	139968	127245	138377	CPD-14453	CPD-14453 [ C10H8O4, tgt= ]			(216.7989, 435.82938)(175.03539, 6635.241)(176.03723, 524.9408)(211.07974, 1015.4025)	1.46439
CPD-14452	110832	109572	112669	111980	104747	103913	113983	114057	1	134707	92178	224130	91160	103020	152172	149792	136986	134349	143591	140195	153523	149645	124794	123740	123759	121843	122577	118850	106796	108020	CPD-14452	CPD-14452 [ C11 H10 O4, tgt=43.82, overall=43.82 ]			(207.06488, 8366.971)(190.04836, 68979.64)(191.05162, 6122.5737)(206.07974, 6278.55)(231.0478, 1597.795)	5.0166
COPROPORPHYRIN_I	378987	354907	335939	340012	335047	329029	470701	384971	353710	345846	340695	348989	449853	388527	382372	380616	367811	372805	451647	363020	349702	356170	320025	326613	468546	377380	336728	322997	424388	427442	COPROPORPHYRIN_I	COPROPORPHYRIN_I [ C36 H34 N4 O8, tgt=57.67, overall=57.67 ]			(637.2249, 5755.6157)(638.2289, 470.88403)(652.2373, 23397.96)(653.2398, 5492.25)(654.2521, 21097.76)(655.2542, 5031.49)(659.2802, 39811.113)(660.2113, 9994.145)	6.4108
CPD-14455	303032	1	1	1	1	1	1	1	1	1	1	1	1	128325	156420	158070	180863	169436	1	1	1	1	1	1	203449	1	1	1	1	1	CPD-14455	CPD-14455 [ C15 H16 O9, tgt=38.36, overall=38.36 ]			(340.08423, 6908.864)(341.08014, 2335.0728)(359.12363, 4101.39)(361.1215, 14955.844)	3.08064
CPD-14454	303032	1	1	1	1	1	1	1	1	1	1	1	1	128325	156420	158070	180863	169436	1	1	1	1	1	1	203449	1	1	1	1	1	CPD-14454	CPD-14454 [ C15 H16 O9, tgt=38.36, overall=38.36 ]			(340.08423, 6908.864)(341.08014, 2335.0728)(359.12363, 4101.39)(361.1215, 14955.844)	3.08064
CPD0-1276	250592	238851	2150347	2141025	236714	1877326	212851	187223	251611	264404	207884	218240	267486	245178	223335	1710347	204747	211699	247650	228986	180861	174620	229859	217459	243792	217592	210667	214713	224222	225470	CPD0-1276	CPD0-1276 [ C8 H12 N O4, tgt=47.59, overall=47.59 ]			(209.11627, 92729.69)(212.94182, 3524.9822)(213.0704, 585.925)(191.05157, 9803.338)	4.38623
CPDQT-419	210910	210585	228027	221531	205617	207737	315187	319864	298256	295248	321169	317229	1	226958	325957	338079	422254	422614	455738	443096	450457	448726	422840	415190	358396	360277	239502	235245	341744	325441	CPDQT-419	CPDQT-419 [ C16 H31 N O6 S2, tgt=59.70, overall=59.70 ]			(399.1576, 20164.186)(400.16052, 2105.8545)	9.7694
CPDQT-418	1	1501742	1268309	1304544	1400433	1359313	1998635	665707	1846284	1958059	352786	2120821	2151167	2059005	1937751	1972927	1947116	1933671	809129	1661011	1505424	1516058	301029	274217	2295778	945548	1756763	1815185	1831446	1821135	CPDQT-418	CPDQT-418 [ C15H29NO6S2, tgt= ]			(386.1721, 4535.255)(387.34998, 2817.332)(388.06454, 1044.3917)(389.1397, 1611.008)(371.12823, 13549.433)(388.1543, 268.02335)(371.5081, 1925.9706)(369.1456, 293.73)(401.17526, 17935.883)(402.17844, 1631.2087)(383.16525, 11480.174)(384.17453, 642.5467)(406.13553, 1575.5502)(388.12418, 1218.0767)	6.3638
CPD0-1274	109399	1	75918	73196	78457	80312	133641	1	80416	1	1	1	1	100805	78664	1	1	1	146670	83907	74889	86348	1	76081	148885	100782	1	1	1	1	CPD0-1274	CPD0-1274 [ C7 H5 O4, tgt=6.64, overall=6.64 ]			(135.0116, 416.15)(157.03651, 1367.9667)(171.04887, 4799.492)(153.03827, 1098.5208)	1.39259
CPDQT-411	2235154	2218356	2086775	2077889	2156413	2119253	500326	483759	558632	559842	514103	3397560	527486	518398	507054	507657	563470	555386	483693	459949	509824	513874	3319768	3353463	698077	680272	4031720	3902372	511378	508536	CPDQT-411	CPDQT-411 [ C6 H13 N O S2, tgt=54.74, overall=54.74 ]			(181.0482, 10736.356)(163.28899, 423357.9)(164.30469, 35693.637)(165.04323, 3109.5835)(179.06879, 52997.125)(180.07225, 3579.925)	11.465
CPDQT-415	246107	240836	197454	184052	208504	207750	238963	238508	211127	207487	1	271473	240905	231753	221168	241722	191670	188514	295000	297078	1	1	321600	312359	257096	247479	1	250425	243470	1	CPDQT-415	CPDQT-415 [ C10 H21 N O S2, tgt=63.89, overall=63.89 ]			(253.14073, 6362.968)(235.1305, 10447.584)(236.13367, 671.87335)	8.421
CPDQT-417	576610	616226	247952	142028	247973	493121	128486	128357	511955	1	1	123673	332736	130173	416305	436479	440315	527630	388529	1	1	1	325899	293963	256927	703192	138423	875875	676554	661658	CPDQT-417	CPDQT-417 [ C14 H27 N O6 S2, tgt=44.25, overall=44.25 ]			(373.12317, 979.23663)(352.01266, 14821.852)(354.19937, 1827.4926)(371.5418, 24227.113)(372.81006, 2691.0916)(373.8068, 435.86838)(374.13724, 536.815)(387.8238, 4681.4087)(370.1467, 4105.3003)(370.14978, 745.26337)(395.1267, 3063.1152)(375.10217, 12921.005)(376.1051, 498.84998)	6.26812
CPDQT-416	137649	763017	801659	798234	772015	739059	624686	625145	767475	316251	301040	302172	155021	152758	215174	210576	287812	297310	424753	415405	436461	437772	365414	360460	147691	623786	607818	604003	603566	582709	CPDQT-416	CPDQT-416 [ C12 H23 N O6 S2, tgt=43.77, overall=43.77 ]			(344.25034, 62601.203)(346.43164, 16193.094)(347.0996, 1938.3025)(324.0916, 2042.62)(345.094, 179400.11)(346.09656, 28197.422)(347.10037, 2466.3367)(324.0998, 1363.4315)(362.2482, 8066.991)(360.12955, 402.0317)(346.12292, 996.2692)(347.12756, 237.59749)(368.07697, 1072.0643)	8.455
CPD-724	112566	90380	229875	232970	162448	154166	185778	189352	344301	358049	1	166205	214287	212580	441967	437378	367815	357158	814391	814932	628388	619437	868768	772258	204241	188625	222569	216856	230681	223245	CPD-724	CPD-724 [ C28 H50 O5, tgt=15.91, overall=15.91 ]			(489.35077, 8420.987)(490.35312, 1806.072)(469.38052, 909.6766)(471.3404, 8258.122)(472.34256, 1729.814)	15.7464
L-ORNITHINE	578428	707028	706611	1964658	697123	687925	731384	1914151	840785	2550353	774145	803045	2217700	568896	687927	576073	1	1251167	1865142	1879947	1572662	1527400	2024243	704609	2118093	2148211	657036	2136868	719834	703535	L-ORNITHINE	L-ORNITHINE [ C5 H13 N2 O2, tgt=55.60, overall=55.60 ]			(133.10013, 27799.479)(134.1034, 1201.6407)(155.1415, 1956.3552)(137.1306, 255.215)	6.7299
CPD-723	985914	921070	270846	273471	188328	199659	232504	1	352658	346279	298909	207705	384159	354601	359079	335167	300782	305118	608041	561835	450911	1	617424	559659	257080	232449	218588	202304	222091	204248	CPD-723	CPD-723 [ C28 H50 O4, tgt=27.32, overall=27.32 ]			(473.35574, 4332.3105)(474.35828, 225.33499)(455.41803, 11664.742)(456.441, 1782.895)	16.4751
CPD-725	660318	617401	542077	539691	610690	627970	1018289	296428	503412	506654	298077	290514	1766938	378971	355669	363774	402541	425562	389871	385806	347625	339781	405522	405940	383040	355444	321292	325153	262714	268769	CPD-725	CPD-725 [ C18 H29 O4, tgt=47.61, overall=47.61 ]			(309.20245, 3840.841)(291.19226, 13768.443)(292.19568, 1432.8511)(293.208, 443.29)(293.20752, 11664.849)(294.21036, 512.12396)(328.2442, 9504.727)(329.2474, 273.98428)(333.06027, 29985.506)(334.20288, 5953.3887)(315.18936, 12053.295)(316.195, 1093.31)	13.3341
CPD-729	624966	583483	1	1	571118	591907	188434	183596	352910	353271	251536	247850	1863682	296728	268680	255733	272331	281777	377027	1	226565	231469	399150	385797	416541	1114675	496706	220301	209288	216240	CPD-729	CPD-729 [ C18 H27 O3, tgt=43.65, overall=43.65 ]			(291.19226, 14357.27)(292.19547, 1073.9612)(274.39108, 3257.1235)(276.1992, 412.84)(293.20755, 14452.224)(294.2107, 974.07007)(275.1976, 6114.667)(276.2007, 575.28503)(315.18936, 10327.698)(316.19455, 1105.2146)	14.5694
CPD-16013	97806	98949	144593	148110	116088	128743	176638	159904	199188	201855	173484	174776	283084	247245	235067	231024	283018	278319	268406	247196	245349	254964	244036	247791	167043	145919	101786	108636	169577	166082	CPD-16013	CPD-16013 [ C4 H6 N O2, tgt=45.86, overall=45.86 ]			(127.03796, 16029.046)(105.01755, 10957.416)	10.4148
L-GLUTAMATE_GAMMA-SEMIALDEHYDE	2057011	1969907	1	2233829	2048550	2055943	2267785	2162217	2471613	2458993	2350279	2348411	2245405	2373584	2204528	2183631	2142540	2119543	2011612	2075220	1838039	1876322	2075627	2003754	2071886	2045153	2070141	2094650	2235622	2150233	L-GLUTAMATE_GAMMA-SEMIALDEHYDE	L-GLUTAMATE_GAMMA-SEMIALDEHYDE [ C5 H9 N O3, tgt=59.20, overall=59.20 ]			(133.06366, 146.38)(115.05328, 2070.251)(116.05336, 309.53403)(149.09496, 48189.75)(150.09802, 3066.5454)(151.11034, 169.53001)(131.08444, 14031.239)(132.0885, 150.21)	4.9994
CPD-9778	123114	109301	1	1	89792	85258	123543	96627	1	1	1	1	149068	113673	1	1	1	1	94817	1	89879	88790	1	1	130142	94859	1	1	1	1	CPD-9778	CPD-9778 [ C5 H4 O5, tgt=42.68, overall=42.68 ]			(144.00365, 8167.2583)(145.0044, 412.44)(147.02193, 4709.205)(167.05391, 876.07184)(145.03346, 4271.0693)	1.397
CPD-9774	1	1	1	126643	1	1	1	1	1	1	1	1	1	1	1	1	1	1	1	1	1	1	1	1	195204	1	155744	1	1	1	CPD-9774	CPD-9774 [ C10 H18 N O4, tgt= ]			(217.12035, 11030.043)(199.11015, 1485.7866)	9.2105
CPD-730	1861891	1781807	1204973	1215546	1435978	1454476	1738377	1	3005050	1	2187296	2211065	1	1	2208066	2171572	2110542	1	1	1701777	1	1773606	1557223	1	3270539	3101435	2183682	2184913	1996501	2013339	CPD-730	CPD-730 [ C18 H29 O3, tgt=55.65, overall=55.65 ]			(293.20847, 57001.734)(294.2114, 8478.468)(275.19775, 17644.361)(276.2009, 1620.612)(277.21274, 41780.285)(278.21564, 5551.06)(279.22336, 771.8467)(316.19315, 4826.6675)	15.154
CPD-9776	1	1	1	1	1	1	1	1	1	480707	410096	1	1	1	1	1	1	1	1	1	1	22566076	507269	510778	638155	620223	657126	646730	1	1	CPD-9776	CPD-9776 [ C17 H22 N O4, tgt=29.78, overall=29.78 ]			(305.1562, 10956.201)(306.15582, 554.555)(304.17316, 16388.836)(329.1596, 24122.33)(330.1622, 200.57)(331.1625, 934.49)	4.93356
CPD-731	4036411	3634722	3901803	3831458	3679132	3717088	4151802	4035206	3785638	3805136	4996234	4293252	3778662	3952010	4250833	4226865	4378458	4436177	4574086	4538821	4980843	4710847	223874	219215	3601453	3665235	3326540	3285648	4439155	4378776	CPD-731	CPD-731 [ C12 H17 O3, tgt=71.20, overall=71.20 ]			(209.11594, 78502.06)(210.11877, 7064.2256)(211.12929, 762.8278)(191.10498, 24640.494)(192.10805, 1744.5945)(211.12874, 5407.497)(212.13055, 334.48502)(193.12013, 1990.34)(229.83061, 3104.0967)	4.8738
CPD-9775	199779	186035	173881	168227	171928	180295	182913	160870	180591	177705	176436	161794	215848	186176	166507	174883	137335	148737	215482	191021	168808	173610	190312	179609	247388	213339	196133	189747	159918	151716	CPD-9775	CPD-9775 [ C10 H15 N O3, tgt=43.86, overall=43.86 ]			(202.11664, 3507.0652)(215.13693, 11410.262)	2.065
CPD-713	920874	869373	1163937	1180163	975339	1006569	941163	932533	1161784	1097888	1073472	1051195	1191819	1009023	980522	936948	857678	875652	1099390	1081285	1227775	1077569	1069804	949961	801104	784888	870400	856634	988933	942330	CPD-713	CPD-713 [ C28 H48 O2, tgt=50.98, overall=50.98 ]			(439.35135, 19773.805)(440.35437, 4560.386)	18.3594
CPD-712	113438	102741	1	1	1	1	108225	105110	1	1	1	1	107779	104517	1	1	1	1	1	1	95223	94121	1	1	100635	87774	1	1	1	1	CPD-712	CPD-712 [ C28 H50 O2, tgt=43.73, overall=43.73 ]			(447.3978, 3032.0588)(403.37308, 2983.78)(420.39886, 6702.382)(425.3687, 5782.0786)(420.39923, 6822.225)	21.5479
CPD-15447	1140267	1094956	351432	346069	1	1	1204181	1175972	1	1	1	1	1068033	1050517	1	1	1	1	1	1	1031532	1035201	1	1	1222716	1219692	1	1	1	1	CPD-15447	CPD-15447 [ C30 H52 O4, tgt=27.62, overall=27.62 ]			(500.3883, 24560.135)(501.39084, 5478.1255)	19.1102
CPD-711	113438	102741	1	1	1	1	108225	105110	1	1	1	1	107779	104517	1	1	1	1	1	1	95223	94121	1	1	100635	87774	1	1	1	1	CPD-711	CPD-711 [ C28 H50 O2, tgt=43.73, overall=43.73 ]			(447.3978, 3032.0588)(403.37308, 2983.78)(420.39886, 6702.382)(425.3687, 5782.0786)(420.39923, 6822.225)	21.5478
5-P-RIBOSYL-N-FORMYLGLYCINEAMIDE	1	1	1884426	1904477	1890144	1895183	1556758	1465653	1223078	1226663	1249495	1248996	1252907	1142883	1406434	1381016	1061149	1044164	1164845	1008163	1052419	1052041	905155	904239	1429743	1231159	936040	869173	1455316	1435150	5-P-RIBOSYL-N-FORMYLGLYCINEAMIDE	5-P-RIBOSYL-N-FORMYLGLYCINEAMIDE [ C8 H13 N2 O9 P, tgt=2.24, overall=2.24 ]			(317.0611, 3799.4358)(318.0638, 658.78)(295.0413, 45648.03)(296.04395, 4364.115)(331.07877, 3725.355)(316.72943, 5440.024)(317.06207, 4099.0703)	7.37372
CPD-710	279390	102827	442438	450300	163856	403022	364946	337182	953190	670622	1	243895	426715	515599	334745	313047	229870	227019	232356	216301	1	1	267530	134168	234359	225148	335006	321443	1	1	CPD-710	CPD-710 [ C28 H50 O, tgt=24.20, overall=24.20 ]			(425.37167, 1675.585)(407.3616, 6892.352)(408.365, 372.2675)	20.6618
CPD-716	249980	243224	387658	371501	292665	299433	320443	312072	426617	410290	1	1	461127	428375	1	431162	1	1	1	653559	488473	478896	1	1	326466	310397	367693	363155	1	1	CPD-716	CPD-716 [ C28 H48 O4, tgt=47.40, overall=47.40 ]			(453.33072, 17030.672)(454.33368, 3876.7754)	14.8686
CPD-715	1012557	950147	1269752	1239275	1075567	1095648	1053063	1010329	1261989	1184753	1163502	1139374	1134363	1118002	1053720	1007004	920613	946112	1204942	1174216	1138622	1176634	1146637	1021479	867940	838616	944699	920725	1073790	1024165	CPD-715	CPD-715 [ C28 H50 O3, tgt=51.37, overall=51.37 ]			(457.3611, 2274.8335)(439.3514, 20596.28)(440.35437, 4826.4746)	18.3464
CPD-15445	601016	396637	1073263	1042301	886575	478983	476631	422088	648943	606001	644152	635299	472930	438509	501835	463044	417350	438204	454482	418254	511575	365642	502082	391121	562240	516974	641484	646811	386229	382722	CPD-15445	CPD-15445 [ C42 H72 O14, tgt=64.62, overall=64.62 ]			(805.4989, 14473.198)(806.50604, 6182.4863)(786.9865, 12447.786)(787.9899, 4206.41)(805.4998, 12429.14)(806.5113, 5449.16)(787.4883, 12028.786)(788.4919, 3900.4563)(789.50146, 7013.5864)(822.52576, 2898.673)(823.62396, 6723.0044)(824.5431, 73818.22)(800.5133, 11691.408)(801.51776, 4193.9346)(826.3453, 34812.4)(827.7889, 51974.01)(828.8245, 98518.82)(829.3303, 145934.61)(829.4998, 202242.03)(805.4…	19.4755
CPD-714	985914	155713	297506	270965	213157	217562	250016	1	380487	368221	319026	217603	405984	389787	385755	372047	335433	336159	623262	606773	1	1	674980	589867	274881	258981	236899	231438	240801	229491	CPD-714	CPD-714 [ C28 H48 O3, tgt=27.32, overall=27.32 ]			(455.42075, 10980.732)(456.40204, 1620.9568)(437.48413, 5252.779)(438.33716, 709.18)	16.4797
CPD0-1326	1396535	1348326	1	1	1	1	1121308	1107596	1	1	1	1	1588754	1546400	1	1	1	1	1	1	1200958	1218725	1	1	1964683	1906375	1	1	1	1	CPD0-1326	CPD0-1326 [ C17 H18 Br N3 O13 P2, tgt=58.75, overall=58.75 ]			(615.9503, 32054.104)(616.9521, 2142.28)(594.93915, 2011.473)(639.9386, 2316.6099)(617.9258, 3093.9048)	20.2666
CPD-719	249980	243224	387658	371501	292665	299433	320443	312072	426617	410290	1	1	461127	428375	1	431162	1	1	1	653559	488473	478896	1	1	326466	310397	367693	363155	1	1	CPD-719	CPD-719 [ C28 H48 O4, tgt=47.40, overall=47.40 ]			(453.33072, 17030.672)(454.33368, 3876.7754)	14.8686
CPD-718	211011	212505	1	138615	147947	114737	226519	247822	1	164479	1	136228	246413	261830	1	1	263625	266501	258540	250051	190162	217916	238045	238105	240670	246761	362949	335205	174729	171615	CPD-718	CPD-718 [ C28 H46 O4, tgt=31.53, overall=31.53 ]			(469.3785, 462.215)(448.37167, 11759.0)(449.37442, 2030.0349)(469.32516, 11146.272)(470.3285, 1778.4432)(451.98526, 1327.465)	12.0304
CPD-5441	557359	453332	2454730	1	1108804	817030	733978	665353	756622	738573	782611	1804663	1	934709	541101	1329606	512884	698308	1273144	800479	808741	800549	657332	480046	1152953	859368	755848	552255	511507	1510193	CPD-5441	CPD-5441 [ C4 H11 N O4 P, tgt=44.56, overall=44.56 ]			(170.04694, 3835.4448)(171.0483, 4300.128)(173.05841, 6051.46)(153.20518, 1293.8643)(155.04158, 5528.426)(169.05067, 10373.235)(170.04912, 4276.0894)(191.03535, 1169.3386)(177.03308, 3221.8037)	1.8168
CPD-9789	683675	339620	668807	691191	641072	1	786453	704717	334082	337049	365786	284578	1	822993	312801	816181	823809	824989	1	224242	408776	667275	763336	296921	867701	769194	717685	704289	382577	699861	CPD-9789	CPD-9789 [ C21 H25 N O5, tgt=72.92, overall=72.92 ]			(373.06653, 2040.3706)(374.1796, 99.54)(353.15396, 446.80948)(373.17752, 6604.3433)(354.24805, 5339.401)(355.1706, 1442.0758)(389.2071, 161.82)(371.20105, 4090.4214)(376.1463, 1560.065)	6.2803
CPD-9788	6456177	6059518	5173766	5149096	5468498	5382133	8650766	7948556	7741326	7739573	1	7404847	9511086	8875986	9027302	8930390	11369967	11197237	7403901	6828394	6355240	6370068	1	6674336	9279143	8608609	5873015	5723715	8343352	8369425	CPD-9788	CPD-9788 [ C22 H27 N O5, tgt=70.60, overall=70.60 ]			(385.17935, 304.96146)(387.19504, 395.18805)(403.2314, 187.68)(408.17624, 254962.75)(409.17853, 49871.25)(410.17584, 13296.404)(390.16907, 946.6548)	4.3992
CPD-9787	1825134	828285	937877	625357	822375	814302	1598645	1	1	1	1	1	1054460	1	1	1	1950662	1931072	1739459	1763741	1370892	1354737	1976452	917685	1125917	1	947729	1953955	1	1	CPD-9787	CPD-9787 [ C21 H26 N O5, tgt=56.50, overall=56.50 ]			(354.17114, 2330.0054)(355.16696, 290.48874)(373.17795, 9357.905)(374.18225, 686.97375)(381.46268, 915.2235)(382.16617, 1085.6533)	4.1234
CPD-9786	93243	186112	148169	161998	163355	162482	96671	322532	359472	431273	327292	330464	164414	142450	220657	225944	268815	169911	90687	257056	138371	145287	255275	103422	181909	379374	1	189374	177560	172648	CPD-9786	CPD-9786 [ C20 H24 N O5, tgt=58.17, overall=58.17 ]			(358.16068, 8577.8125)(343.76273, 2123.669)(364.19086, 652.92004)(343.41962, 5182.3965)(344.17267, 652.52997)(385.1771, 669.71)(365.77805, 1994.0583)(367.1554, 1561.206)	10.2903
CPD-720	1012557	950147	1269752	1239275	1075567	1095648	1053063	1010329	1261989	1184753	1163502	1139374	1134363	1118002	1053720	1007004	920613	946112	1204942	1174216	1138622	1176634	1146637	1021479	867940	838616	944699	920725	1073790	1024165	CPD-720	CPD-720 [ C28 H50 O3, tgt=51.37, overall=51.37 ]			(457.3611, 2274.8335)(439.3514, 20596.28)(440.35437, 4826.4746)	18.3464
CPD-9785	3717645	3595722	4789240	4705264	4124657	4058436	2431275	2257008	4196933	4152108	3380696	3445063	2642035	2636968	3310965	3304562	2756078	2746617	2676770	2516980	2162269	2164622	2594485	2543189	3035657	2858119	2199533	2137716	2286307	2263490	CPD-9785	CPD-9785 [ C22 H25 N O6, tgt=63.02, overall=63.02 ]			(385.1779, 530.7413)(426.1134, 3547.0964)(426.1573, 2547.79)(404.15125, 150219.53)(405.15317, 25532.408)(406.1571, 4084.4192)	5.2428
CPD-9790	321508	306474	1	304249	1689886	289332	575291	2434559	620471	632742	400455	2444654	3594356	1	3611470	3641361	4795977	4806013	3616212	3772504	4041558	4008567	3431361	3363519	3002445	2320132	2432649	2327595	3522562	3506209	CPD-9790	CPD-9790 [ C21 H27 N O5, tgt=26.51, overall=26.51 ]			(373.8579, 19847.684)(375.20026, 3053.6426)(355.17142, 54478.137)(356.1744, 7109.592)(397.17557, 690.11005)(380.18423, 478.8975)	6.8758
5-METHOXYFURANOCOUMARIN	284207	263044	279626	283365	273638	262782	345840	295751	440391	423030	376513	381093	473114	380967	346682	351239	312220	321411	419143	333276	306062	306222	349663	329498	393237	338632	296876	283454	300009	282697	5-METHOXYFURANOCOUMARIN	5-METHOXYFURANOCOUMARIN [ C12 H8 O4, tgt=9.68, overall=9.68 ]			(201.0401, 156.47)(222.05862, 1432.2717)(199.04332, 11704.319)(200.04494, 432.16855)(201.03992, 543.95)	2.146
CPD0-1354	221276	222076	340917	339888	277556	264243	492627	474476	372596	372419	390331	380736	470755	472851	542730	558314	614947	625222	543436	533270	521353	522704	502921	453178	473102	436645	304616	299021	510169	483167	CPD0-1354	CPD0-1354 [ C12 H19 N4 O7 P2 S, tgt=54.84, overall=54.84 ]			(443.0766, 22772.209)(444.07922, 3102.3972)(425.06592, 3908.4744)	9.1882
METHYL-BETA-D-GALACTOSIDE	1804273	1756778	1777697	1780351	1672570	1665418	1820890	1743977	1607817	1578584	1486828	1524752	1724724	1712911	1627264	1615012	781411	1610062	1690372	1616552	1579080	1549310	1508073	1499741	1913128	1856107	1791365	1772298	1750978	1716399	METHYL-BETA-D-GALACTOSIDE	METHYL-BETA-D-GALACTOSIDE [ C7 H14 O6, tgt=47.36, overall=47.36 ]			(177.06842, 8318.658)(181.08432, 158.68001)(220.89203, 109.87864)(221.0742, 196.55)(180.08517, 812.25336)(199.0945, 110.85)(199.05812, 2974.648)(197.1153, 104.89)	3.9874
CPD-18262	566836	572642	509245	1	330943	341133	397139	396551	567644	579808	596036	407852	852232	297161	215857	221871	274674	804433	420180	403468	377429	1	675683	405661	520087	504594	652812	623339	399294	402325	CPD-18262	CPD-18262 [ C16 H28 O6, tgt=44.34, overall=44.34 ]			(316.19284, 4146.5913)(317.20465, 1009.275)(317.20404, 18296.275)(318.207, 2449.45)(334.21817, 1624.3363)(317.20593, 20264.283)(318.209, 2961.0466)(339.57562, 23781.463)(340.17706, 2629.5017)	10.8323
GLUTACONATE	1679016	1663127	1668019	1651415	1582611	1631142	1949048	1588124	1688692	1721996	1584957	1633894	2013631	2163601	1728454	1773724	1550453	1557826	1992882	1770151	1722432	1686128	1698461	1615087	2507291	1709870	1782655	1698900	1693717	1609313	GLUTACONATE	GLUTACONATE [ C5 H4 O4, tgt=51.06, overall=51.06 ]			(115.01218, 3990.8975)(129.02164, 125626.14)(130.02354, 5602.8413)(113.81518, 18518.592)(115.01495, 3092.2664)(131.04385, 2877.4114)(153.00871, 522.145)	1.3974
OCTAPRENYL-DIPHOSPHATE	1043986	1009603	1	1077633	1053983	1099668	1101635	1060016	1155883	1160170	1101316	1082504	353748	1115394	378299	359886	321680	347064	1057394	1029133	772935	762116	1018087	1050304	292563	334102	828695	809422	416683	346787	OCTAPRENYL-DIPHOSPHATE	OCTAPRENYL-DIPHOSPHATE [ C40 H65 O7 P2, tgt=46.50, overall=46.50 ]			(720.8146, 1706.1211)(704.2011, 760.19336)(705.40967, 2032.195)(738.7275, 4785.465)(739.56757, 1490.6643)(742.4604, 126.78)(743.6834, 24546.2)(744.5223, 9844.783)(745.52844, 1636.9646)	19.0084
MESO-TARTRATE	515243	517256	223403	288212	320693	330374	451626	436253	218881	261549	161255	1	566428	389151	227808	216602	237640	225470	350293	212025	378996	326245	242800	206394	390171	362518	190599	195199	193491	161576	MESO-TARTRATE	MESO-TARTRATE [ C4 H4 O6, tgt=46.41, overall=46.41 ]			(153.00882, 530.80286)(129.99312, 29087.527)(130.99878, 890.365)(130.99936, 994.192)(170.0475, 4415.2017)(171.04886, 4950.8525)(153.03827, 1043.9126)	1.39638
CPD-15468	37694676	36923940	35189084	34845144	35253428	35104672	30158942	29553420	30350100	29882952	36143432	36247292	32298576	31864508	32059128	31838012	31855546	31542936	27100996	26494452	27380542	26708800	24803048	24960996	30984630	30214738	27920592	27731912	32786908	32370890	CPD-15468	CPD-15468 [ C18 H16 O7, tgt=76.66, overall=76.66 ]			(345.09433, 1028710.6)(346.09744, 181559.3)(347.09912, 23705.725)(348.101, 1022.4571)(365.6016, 817.1944)(367.07538, 132250.84)(368.9967, 4024.6887)(369.08105, 2693.755)	13.9696
CPD-16020	18782126	17736636	13436422	13258872	15174382	15058394	21549572	17564192	13768807	13642515	12413609	12209913	20400616	17296692	14162265	13970198	16913260	16809954	16862684	14017733	13979382	13965082	13106692	12817416	18744888	15596936	13599961	13315769	14129700	14125941	CPD-16020	CPD-16020 [ C10 H13 N5 O4, tgt=86.57, overall=86.57 ]			(267.095, 15531.641)(268.10245, 548560.94)(269.10446, 57247.824)(270.10583, 5292.872)(286.13605, 327.4943)(291.081, 20842.012)(292.08395, 779.0458)	2.1112
CPD0-1342	142465	119407	139408	156013	129142	132395	173861	132472	164525	150309	138130	144498	207058	155849	155968	135718	139831	133383	205041	141028	135276	144192	143335	141162	184704	125785	129453	131779	152915	157144	CPD0-1342	CPD0-1342 [ C9 H11 N2 O5 S, tgt=57.21, overall=57.21 ]			(282.0285, 11789.479)(283.02997, 3425.6177)(265.0203, 1087.5618)	1.3968
CPD-15474	427755	413862	510190	502625	454485	441206	576456	1	1	1	474550	474659	595172	542909	582208	602034	1	1	1	560326	554403	532625	1	1	579676	1	1	1	564971	552520	CPD-15474	CPD-15474 [ C19 H18 O7, tgt=67.69, overall=67.69 ]			(359.10825, 20949.8)(360.11133, 2634.9355)	9.20314
CPD-15473	2096427	3048341	3455870	3358127	2411568	2314514	2292332	672711	657233	629274	730951	715931	2639013	2415590	722297	732061	739429	2030200	431520	431521	441386	446740	401946	387911	566849	552710	540432	530846	1	1	CPD-15473	CPD-15473 [ C17 H14 O7, tgt=78.61, overall=78.61 ]			(331.07767, 41189.31)(332.08054, 5541.6235)(333.0837, 268.67667)(313.0669, 417.945)(331.0789, 115774.79)(332.08148, 16658.459)(333.08347, 1236.0483)(314.89078, 20551.629)(316.0866, 13797.582)(317.0886, 751.8367)(353.05927, 305.235)(337.06442, 1515.0725)	11.7666
GLUTAMIDE	1	1	1	1	1	1	1	1	1	1	1	1	1	1	1	1	1	1	303517	211850	146092	161944	216637	212597	313351	208143	211046	183408	93998	93255	GLUTAMIDE	GLUTAMIDE [ C5 H10 N2 O3, tgt= ]			(147.43906, 1511.8445)(151.0772, 1374.7716)(147.0757, 274.32)(146.09059, 8620.411)	2.0228
CPD-15477	8364981	78528664	84870800	84039584	82765600	7686088	9150097	9530786	9939695	9718519	11699516	11044937	89159760	9599787	10363288	10310396	9537928	9627784	8121573	8158074	8187257	8330389	7598143	7903128	84933416	82133896	73880816	7883774	10436513	10714773	CPD-15477	CPD-15477 [ C18 H16 O6, tgt=94.80, overall=94.80 ]			(329.09927, 635735.44)(330.102, 113459.234)(331.10406, 13233.612)(332.10706, 3002.215)(349.13766, 94358.59)(350.1404, 16442.635)(351.08005, 48223.684)(352.2092, 22471.484)(353.08594, 2222.9644)	16.366
CPD-15476	37694676	36923940	35189084	34845144	35253428	35104672	30158942	29553420	30350100	29882952	36143432	36247292	32298576	31864508	32059128	31838012	31855546	31542936	27100996	26494452	27380542	26708800	24803048	24960996	30984630	30214738	27920592	27731912	32786908	32370890	CPD-15476	CPD-15476 [ C18 H16 O7, tgt=76.66, overall=76.66 ]			(345.09433, 1028710.6)(346.09744, 181559.3)(347.09912, 23705.725)(348.101, 1022.4571)(365.6016, 817.1944)(367.07538, 132250.84)(368.9967, 4024.6887)(369.08105, 2693.755)	13.9696
L-GULONO-1-4-LACTONE	753991	491858	397898	1	1	498994	912860	571370	258921	1	308356	1	993652	618152	444105	856879	446401	201075	1253013	220775	499860	482386	205545	324196	1511622	1048049	1	450056	322637	1	L-GULONO-1-4-LACTONE	L-GULONO-1-4-LACTONE [ C6 H10 O6, tgt=41.96, overall=41.96 ]			(201.04236, 28576.297)(202.04663, 1520.9891)(188.03676, 4166.422)	1.393
PHOSPHORYL-CHOLINE	1076504	958148	1287826	1224988	1062931	1078094	1392088	1068207	1127060	1119076	1412685	1387620	1507721	1150026	1225806	1229285	1366014	1332282	2333843	1810469	1849940	1814054	1571683	1550126	1981424	1492157	852148	840600	1442742	1443593	PHOSPHORYL-CHOLINE	PHOSPHORYL-CHOLINE [ C5 H13 N O4 P, tgt=71.23, overall=71.23 ]			(210.05898, 1532.3156)(165.0532, 13764.545)(185.06252, 4584.7095)(182.07968, 48491.633)(183.08261, 3372.0266)	2.1298
RHAMNOSE	748378	713361	1541382	1563277	1307786	1302775	1859009	1798657	1268175	1273676	1907142	1965354	2157337	2121182	2016961	2038412	1720984	1686040	2034666	2017382	1929365	1906480	1937191	1939947	2288905	2278970	1134039	1142469	1770295	1771086	RHAMNOSE	RHAMNOSE [ C6 H12 O5, tgt=76.91, overall=76.91 ]			(146.05899, 42423.105)(147.06169, 3301.0803)(169.04799, 9392.978)	4.2966
CPD-15485	163206	1	145969	175808	145118	1	160861	1	188561	185892	164396	163955	74857	1	153968	1	77996	75887	1	1	1	1	158624	170082	149415	1	160075	164185	136794	1	CPD-15485	CPD-15485 [ C17 H14 O4, tgt=53.01, overall=53.01 ]			(264.0746, 5779.043)(265.074, 486.59665)(305.4518, 4669.1147)(267.09503, 12135.672)(268.72873, 272580.53)(269.63852, 29695.43)(270.10535, 5409.227)(284.0962, 4700.1123)(290.8289, 22479.248)(291.92978, 5808.067)(292.0844, 1288.4199)	2.14648
CPD-15484	18154550	17114838	12752998	12579942	14547704	14439528	20892964	17011128	1	12859449	11972239	11767797	1	16698986	13661596	1	16495567	16396395	16315762	13564601	1	13557852	12647996	12373772	18139566	15097792	13078362	12808260	1	13728189	CPD-15484	CPD-15484 [ C16 H12 O4, tgt=46.72, overall=46.72 ]			(268.10242, 581851.25)(269.10446, 60598.48)(270.10583, 5680.7896)(293.06244, 1723.8348)(277.06403, 3429.5671)	2.1112
2-OXINDOLE-3-ACETYL-ASP	1618362	4664556	6535490	6502226	5555854	5520831	3757981	3840724	3640775	246876	180821	5452813	4771862	4915286	1	5212659	1827027	4159639	162341	576241	678363	563617	169853	155900	3375240	3438465	2584208	2455971	4675348	4585450	2-OXINDOLE-3-ACETYL-ASP	2-OXINDOLE-3-ACETYL-ASP [ C14 H12 N2 O6, tgt=46.00, overall=46.00 ]			(305.87027, 3120.8)(287.43033, 165765.11)(288.1064, 25176.752)(289.05814, 2503.3682)(305.0856, 7735.145)(289.06433, 6611.3213)(291.08008, 24979.354)(292.0832, 1103.1699)(306.09613, 4097.7476)(331.07794, 2653.522)(313.0673, 10443.723)	5.99233
CPD-15481	423349	418113	423378	414597	411231	408043	351409	354568	432141	427358	452473	479446	393734	393217	431262	434906	392291	392022	330581	511547	360848	359362	1	1	419959	399788	336849	344051	435201	437198	CPD-15481	CPD-15481 [ C16 H12 O5, tgt=66.17, overall=66.17 ]			(285.0729, 17087.656)(286.076, 1152.8114)	14.6012
CPD-15480	1024982	1000999	1111695	1089398	1044649	1051841	708237	737664	599252	605047	1010986	1027674	803361	813862	937910	951414	795750	803177	659482	647401	800348	773400	545324	533707	765657	795688	539871	506454	1088872	1094587	CPD-15480	CPD-15480 [ C15 H10 O5, tgt=68.30, overall=68.30 ]			(271.05765, 42230.95)(272.06058, 4648.317)(295.0494, 77533.125)(296.05362, 9707.385)	7.528
CPD-15486	423349	418113	423378	414597	411231	408043	351409	354568	432141	427358	452473	479446	393734	393217	431262	434906	392291	392022	330581	511547	360848	359362	1	1	419959	399788	336849	344051	435201	437198	CPD-15486	CPD-15486 [ C16 H12 O5, tgt=66.17, overall=66.17 ]			(285.0729, 17087.656)(286.076, 1152.8114)	14.6012
CPD-5401	484387	453522	369462	428268	366254	444935	482762	418953	328049	409849	302586	351041	407655	259938	245387	272668	359048	351271	214717	250046	255825	200299	273488	266884	300538	239263	403884	321718	315382	370993	CPD-5401	CPD-5401 [ C6 H4 Cl Hg O3 S, tgt=40.11, overall=40.11 ]			(390.92816, 420.97)(381.7319, 4511.61)(382.91235, 3223.8638)(378.92715, 2638.363)(382.91406, 557.95)(394.9127, 11835.422)(399.9121, 3675.111)(406.91272, 12260.314)(407.91766, 708.58997)	1.7126
4-P-PANTOTHENATE	173826	159788	378019	391174	374936	144779	468076	211059	128546	128114	156747	290297	809543	231561	153136	189176	157732	139102	781893	191683	214295	210998	161639	164708	623874	619299	253501	618015	218106	206895	4-P-PANTOTHENATE	4-P-PANTOTHENATE [ C9 H15 N O8 P, tgt=44.58, overall=44.58 ]			(322.34308, 1405.4442)(279.0428, 1369.075)(296.0553, 10992.734)(314.08868, 6427.679)(301.06796, 7292.974)(302.84427, 4295.204)(303.0438, 3376.36)	3.52047
BENZIMIDAZOLE	156291	155258	157061	148359	143398	149138	184319	1	147853	151420	140517	1	190783	162544	154208	163600	140120	135749	184888	162034	155868	147081	155191	141270	209615	166389	161605	159323	156903	142668	BENZIMIDAZOLE	BENZIMIDAZOLE [ C7 H6 N2, tgt=46.05, overall=46.05 ]			(141.03961, 11737.413)(142.0436, 965.64386)	1.39936
CPD-734	4036411	3634722	3901803	3831458	3679132	3717088	4151802	4035206	3785638	3805136	4996234	4293252	3778662	3952010	4250833	4226865	4378458	4436177	4574086	4538821	4980843	4710847	223874	219215	3601453	3665235	3326540	3285648	4439155	4378776	CPD-734	CPD-734 [ C12 H17 O3, tgt=71.20, overall=71.20 ]			(209.11594, 78502.06)(210.11877, 7064.2256)(211.12929, 762.8278)(191.10498, 24640.494)(192.10805, 1744.5945)(211.12874, 5407.497)(212.13055, 334.48502)(193.12013, 1990.34)(229.83061, 3104.0967)	4.8738
CPD0-1307	46041248	41660584	40159000	38322644	37287688	36948416	51073396	40723284	40096160	38510688	40733312	40075924	51846200	42296856	42149536	40387964	41884752	40751940	53336820	43592836	39253756	37917160	39824196	38500884	55954720	44212364	41738088	39994140	43126392	42958312	CPD0-1307	CPD0-1307 [ C5 H10 O, tgt=86.93, overall=86.93 ]			(104.106865, 981825.8)(105.10976, 45469.797)(106.1115, 1066.33)	1.6166
CPD-1962	889529	860994	350545	358104	692875	690920	1038728	1014241	1380169	1384431	1234463	1214878	898770	901425	1054253	1046000	1248499	1217166	1440937	1449027	1549605	1534228	1305647	1295639	967120	2114677	1431248	1448994	1099408	1078532	CPD-1962	CPD-1962 [ C15 H14 O5, tgt=66.15, overall=66.15 ]			(257.07892, 20838.174)(258.08206, 1581.0634)(295.13007, 51647.54)(296.1331, 9423.337)(297.1369, 430.6)	16.167
CPD-8248	9418384	9127765	10586392	10349023	9352854	9990194	9876181	9223315	10755192	10647791	672361	11351576	10702454	10895937	10495578	10241005	11195558	11425034	10564437	10450243	11992939	671106	8634457	7996269	10795789	10669489	8654749	8545914	10979255	10765805	CPD-8248	CPD-8248 [ C15 H24, tgt=67.89, overall=67.89 ]			(205.19395, 248927.34)(206.19664, 32715.732)(207.19968, 725.297)	16.5222
MESO-DIAMINOPIMELATE	2078872	1137991	930202	923588	950604	1016738	1087136	1218471	1094964	1523009	2291875	1130052	973290	800941	1688818	1231436	1179693	1316860	1640952	1919453	1768497	1782271	2078301	2030924	874013	973317	1053982	981711	1186305	1088098	MESO-DIAMINOPIMELATE	MESO-DIAMINOPIMELATE [ C7 H14 N2 O4, tgt=69.49, overall=69.49 ]			(191.10493, 17130.021)(192.108, 1227.9141)(173.09453, 556.46747)(211.13016, 684.326)(193.12032, 1058.1555)(197.07866, 637.6657)	4.929
CPD-8244	1395248	1346537	2093225	2068138	1687945	1681985	1862172	1782655	2675834	2598475	1937030	2049930	2590613	2279957	2227486	2196816	2394397	2363055	793694	2018199	733772	2266071	1841563	1832283	2031239	1901474	1644228	1639330	1854442	1867424	CPD-8244	CPD-8244 [ C15 H22, tgt=59.11, overall=59.11 ]			(203.17789, 80236.11)(204.18077, 10292.391)	10.7927
CPD-8245	9418384	9127765	10586392	10349023	9352854	9990194	9876181	9223315	10755192	10647791	672361	11351576	10702454	10895937	10495578	10241005	11195558	11425034	10564437	10450243	11992939	671106	8634457	7996269	10795789	10669489	8654749	8545914	10979255	10765805	CPD-8245	CPD-8245 [ C15 H24, tgt=67.89, overall=67.89 ]			(205.19395, 248927.34)(206.19664, 32715.732)(207.19968, 725.297)	16.5222
CPD-8246	9418384	9641537	10586392	10349023	9851416	9990194	9876181	9737779	10755192	10647791	672361	11351576	10702454	10895937	10495578	10241005	11195558	11425034	10564437	10450243	11992939	671106	8634457	7996269	10795789	10669489	8654749	8545914	10979255	10765805	CPD-8246	CPD-8246 [ C15 H24, tgt=67.89, overall=67.89 ]			(205.19395, 248927.34)(206.19664, 32715.732)(207.19968, 725.297)	16.5222
S-TETRAHYDROBERBERINE	183501	176246	239644	260945	209994	200957	174585	162137	187157	192042	117661	131153	199952	190408	213240	223343	137002	146130	129746	131380	1	123571	112105	79018	156026	1	1	1	1	154265	S-TETRAHYDROBERBERINE	S-TETRAHYDROBERBERINE [ C20 H21 N O4, tgt=67.85, overall=67.85 ]			(322.1458, 1971.9548)(344.16745, 54077.46)(345.16977, 8509.798)(344.13016, 6057.8237)	7.7518
CPD-10157	2577001	2492636	2960411	2908223	790426	787425	3787122	3426256	2945432	805494	3237743	2964213	3750696	3388902	3533513	3564020	3940079	526948	513877	473067	2016773	2021204	485672	464341	3683054	3266350	2809217	684921	537254	3467275	CPD-10157	CPD-10157 [ C12 H21 Fe N3 O6, tgt=25.58, overall=25.58 ]			(357.18842, 10300.696)(358.08054, 782.0177)(339.17868, 10304.534)(340.07077, 999.22766)(345.0901, 903.72)(377.11807, 81570.97)(378.1207, 12918.514)(379.12628, 1294.5682)(359.10852, 19984.246)(360.11157, 2424.9287)	9.71814
2-TRANS6-TRANS-FARNESOL	9982493	9641537	10586392	10349023	9851416	9990194	9876181	9737779	10755192	10647791	672361	11351576	10702454	10895937	10495578	10241005	11195558	11425034	10564437	10450243	11992939	670861	8634457	7996269	10795789	10669489	8654749	8545914	10979255	10765805	2-TRANS6-TRANS-FARNESOL	2-TRANS6-TRANS-FARNESOL [ C15 H26 O, tgt=67.89, overall=67.89 ]			(205.19395, 248927.34)(206.19664, 32715.732)(207.19968, 725.297)	16.5222
CPD-8247	9418384	9641537	10586392	10349023	9851416	9990194	9876181	9737779	10755192	10647791	672361	11351576	10702454	10895937	10495578	10241005	11195558	11425034	10564437	10450243	11992939	671106	8634457	7996269	10795789	10669489	8654749	8545914	10979255	10765805	CPD-8247	CPD-8247 [ C15 H24, tgt=67.89, overall=67.89 ]			(205.19395, 248927.34)(206.19664, 32715.732)(207.19968, 725.297)	16.5222
CPD-8241	9418384	9641537	10586392	10349023	9851416	9990194	9876181	9737779	10755192	10647791	672361	11351576	10702454	10895937	10495578	10241005	11195558	11425034	10564437	10450243	11992939	671106	8634457	7996269	10795789	10669489	8654749	8545914	10979255	10765805	CPD-8241	CPD-8241 [ C15 H24, tgt=67.89, overall=67.89 ]			(205.19395, 248927.34)(206.19664, 32715.732)(207.19968, 725.297)	16.5222
CPD-8240	9418384	9641537	10586392	10349023	9851416	9990194	9876181	9737779	10755192	10647791	672361	11351576	10702454	10895937	10495578	10241005	11195558	11425034	10564437	10450243	11992939	671106	8634457	7996269	10795789	10669489	8654749	8545914	10979255	10765805	CPD-8240	CPD-8240 [ C15 H24, tgt=67.89, overall=67.89 ]			(205.19395, 248927.34)(206.19664, 32715.732)(207.19968, 725.297)	16.5222
CPD-8243	9418384	9641537	10586392	10349023	9851416	9990194	9876181	9737779	10755192	10647791	672361	11351576	10702454	10895937	10495578	10241005	11195558	11425034	10564437	10450243	11992939	671106	8634457	7996269	10795789	10669489	8654749	8545914	10979255	10765805	CPD-8243	CPD-8243 [ C15 H24, tgt=67.89, overall=67.89 ]			(205.19395, 248927.34)(206.19664, 32715.732)(207.19968, 725.297)	16.5222
CPD-8242	9418384	9641537	10586392	10349023	9851416	9990194	9876181	9737779	10755192	10647791	672361	11351576	10702454	10895937	10495578	10241005	11195558	11425034	10564437	10450243	11992939	671106	8634457	7996269	10795789	10669489	8654749	8545914	10979255	10765805	CPD-8242	CPD-8242 [ C15 H24, tgt=67.89, overall=67.89 ]			(205.19395, 248927.34)(206.19664, 32715.732)(207.19968, 725.297)	16.5222
ALPHA-MALTOSE	454080	1	1	1	1	512136	803894	782396	940388	958536	853801	1091823	634593	916827	670221	683056	834268	830954	991998	1003444	1128309	1116148	1197796	875769	1208962	1189503	865024	875542	683317	680052	ALPHA-MALTOSE	ALPHA-MALTOSE [ C12 H22 O11, tgt=49.08, overall=49.08 ]			(343.14905, 454.56)(365.11072, 33403.047)(366.1136, 5130.256)(367.11057, 1245.5062)	16.1716
PORPHYRIN-RING	311126	302079	419642	410883	341750	342275	320017	304051	539277	547276	298699	316187	290699	279471	329067	358225	251599	237200	205179	188536	1	1	260284	251499	1807950	1750592	305576	297140	241053	236546	PORPHYRIN-RING	PORPHYRIN-RING [ C20 H12 N4, tgt=38.01, overall=38.01 ]			(312.1261, 4589.6914)(312.1271, 5221.414)(326.13834, 2831.0112)(331.0904, 13604.952)(332.107, 3374.17)	3.1102
DAPHNIN	303032	1	1	1	1	1	1	1	1	1	1	1	1	128325	156420	158070	180863	169436	1	1	1	1	1	1	203449	1	1	1	1	1	DAPHNIN	DAPHNIN [ C15 H16 O9, tgt=38.36, overall=38.36 ]			(340.08423, 6908.864)(341.08014, 2335.0728)(359.12363, 4101.39)(361.1215, 14955.844)	3.08064
D-SEDOHEPTULOSE-1-7-P2	75117	78333	1	1	1	1	1	1	1	1	1	1	109144	83432	1	1	1	1	1	1	1	1	1	1	84948	1	1	1	1	1	D-SEDOHEPTULOSE-1-7-P2	D-SEDOHEPTULOSE-1-7-P2 [ C7 H12 O13 P2, tgt=34.62, overall=34.62 ]			(370.9583, 6945.1104)(371.95947, 1796.016)	1.391
CPD-8257	454080	1	1	1	1	512136	803894	782396	940388	958536	853801	1091823	634593	916827	670221	683056	834268	830954	991998	1003444	1128309	1116148	1197796	875769	1208962	1189503	865024	875542	683317	680052	CPD-8257	CPD-8257 [ C12 H22 O11, tgt=49.08, overall=49.08 ]			(343.14905, 454.56)(365.11072, 33403.047)(366.1136, 5130.256)(367.11057, 1245.5062)	16.1716
CPD-8256	194051	205247	229038	230253	226679	237010	454986	483808	400922	391371	434734	438142	311896	329406	427223	436065	547841	545774	636160	636810	621162	619147	655864	635043	595518	623322	460234	451664	534851	541568	CPD-8256	CPD-8256 [ C18 H32 O16, tgt=66.40, overall=66.40 ]			(511.18884, 155306.48)(527.16125, 23414.45)(528.16394, 4845.7246)(529.162, 1069.7086)	12.369
CPD-8254	194051	205247	229038	230253	226679	237010	454986	483808	400922	391371	434734	438142	311896	329406	427223	436065	547841	545774	636160	636810	621162	619147	655864	635043	595518	623322	460234	451664	534851	541568	CPD-8254	CPD-8254 [ C18 H32 O16, tgt=66.40, overall=66.40 ]			(511.18884, 155306.48)(527.16125, 23414.45)(528.16394, 4845.7246)(529.162, 1069.7086)	12.369
CPD-8253	454080	1	1	1	1	512136	803894	782396	940388	958536	853801	1091823	634593	916827	670221	683056	834268	830954	991998	1003444	1128309	1116148	1197796	875769	1208962	1189503	865024	875542	683317	680052	CPD-8253	CPD-8253 [ C12 H22 O11, tgt=49.08, overall=49.08 ]			(343.14905, 454.56)(365.11072, 33403.047)(366.1136, 5130.256)(367.11057, 1245.5062)	16.1716
91018-TRIHYDROXYSTEARATE	166321	157773	105907	101320	126673	118928	194502	192351	166136	162892	149363	149820	170294	161445	134611	142671	186315	187211	143078	146083	118034	118293	118453	112638	154278	148856	212158	212516	168584	156019	91018-TRIHYDROXYSTEARATE	91018-TRIHYDROXYSTEARATE [ C18 H35 O5, tgt=47.84, overall=47.84 ]			(335.25467, 37651.11)(336.25772, 7248.284)(337.26804, 9208.082)(331.28036, 10338.343)(332.28375, 673.718)	15.6487
CPD-9716	427755	413862	510190	502625	454485	441206	576456	1	890416	887931	474550	474659	595172	542909	582208	602034	1037586	1022288	1071027	560326	554403	532625	949869	979203	579676	955390	1	1	564971	552520	CPD-9716	CPD-9716 [ C19 H18 O7, tgt=67.69, overall=67.69 ]			(359.10822, 23724.453)(360.1112, 3080.325)	11.0648
CPD-9710	447005	342870	245813	840451	288700	611699	373769	292094	287737	614663	915018	258117	443440	374104	687684	614691	374123	379540	622468	573477	597151	795665	2793453	2776708	173524	209218	242571	215034	301978	297435	CPD-9710	CPD-9710 [ C18 H14 O7, tgt=75.83, overall=75.83 ]			(343.07755, 18221.102)(344.0816, 5689.64)(343.09824, 26348.746)(344.10352, 5650.531)(345.1077, 3415.28)(365.0686, 1397.8889)	6.65307
CPD-8268	1230722	1086635	141067	373037	155088	148448	1722711	1490700	181110	159552	111182	112198	1569218	1408378	133134	126806	237982	215090	239100	188090	1113454	1165467	116865	103135	1750811	1545937	206869	212267	227618	228367	CPD-8268	CPD-8268 [ C39 H71 O8 P, tgt=61.64, overall=61.64 ]			(703.4971, 7351.121)(704.5, 4811.395)(680.47217, 22157.857)(681.47516, 8568.812)(682.4779, 1310.54)(703.4994, 6949.5312)(704.50336, 2397.5232)(681.4862, 9339.998)(682.4907, 2680.2026)(723.187, 6031.1914)(723.39594, 4669.247)(708.5024, 8939.255)(709.50543, 5194.03)	22.1623
CPD-9711	1516765	1440043	1453372	1467873	1404537	1402820	1394980	1596858	1277888	1291687	1462742	1449080	1147120	1328891	1528871	1558771	1686924	1690228	1233429	1439546	1530581	1544892	1286123	1243540	1148868	1300462	1332375	1361650	1629738	1632093	CPD-9711	CPD-9711 [ C23 H24 O7, tgt=50.75, overall=50.75 ]			(412.16168, 38947.773)(413.15714, 8983.388)(399.1584, 2727.2117)(399.1601, 3542.38)(434.19623, 1653.5316)(435.21216, 7224.4)(436.13937, 2333.8577)(440.1502, 2215.1196)(441.16678, 6592.692)(420.14532, 4634.0605)(422.1343, 379.84)	4.8824
CPD-1905	787101	756193	865965	866438	786245	792815	847368	776382	1036045	1027621	773696	784642	943101	889312	789371	771137	634071	654244	734752	677108	524023	510617	760964	742652	889080	815853	871837	850712	697586	681912	CPD-1905	CPD-1905 [ C10 H20 O, tgt=81.95, overall=81.95 ]			(179.1413, 9982.08)(161.13115, 28882.314)(162.13428, 2103.986)	5.0164
CPD-8264	1	1	1	1	1	1	1	1	1	1	1	1	1	1	1	1	1	1	1	1	1	1	1	1	184631	175835	1	1	1	1	CPD-8264	CPD-8264 [ C37 H69 O8 P, tgt= ]			(655.48206, 4263.47)(695.4553, 2098.705)	22.892
CPD-9728	141220	139806	7892387	7682729	5832067	5823187	147242	146447	7612139	7228864	7145758	7077886	136877	136274	7682067	7426116	7325098	7529599	7325823	7057107	129149	129661	7601765	7238354	168372	167423	8016966	7849470	7988260	7881889	CPD-9728	CPD-9728 [ C51 H72 O2, tgt=56.66, overall=56.66 ]			(699.2608, 4044.6763)(701.55035, 2411.5042)(716.55963, 88789.42)(717.5622, 33761.305)(718.564, 5422.5664)(744.57336, 10733.005)(745.57635, 3185.358)	20.8708
DIETHYLPYROCARBONATE	2054894	1944821	1121189	1138479	1595754	1589469	2282449	2137719	1938020	1907509	1661333	1610951	1130161	1063901	1440620	1393342	1521999	1507508	1838110	1714119	1616537	1621313	1672342	1678496	2447163	2221725	2555083	2525694	2219188	2175509	DIETHYLPYROCARBONATE	DIETHYLPYROCARBONATE [ C6 H10 O5, tgt=75.37, overall=75.37 ]			(145.0483, 9027.159)(163.0586, 1094.679)(180.08531, 78013.28)(181.08778, 4106.8486)	7.8962
GLN	1	1	1	1	1	1	1	1	1	1	1	1	1	1	1	1	1	1	303517	211850	146092	161944	216637	212597	313351	208143	211046	183408	93998	93255	GLN	GLN [ C5 H10 N2 O3, tgt= ]			(147.43906, 1511.8445)(151.0772, 1374.7716)(147.0757, 274.32)(146.09059, 8620.411)	2.0228
GLT	191849	186504	150545	155643	167683	171224	185585	178701	163665	159431	167926	156769	183066	170765	172721	168168	186663	191800	146873	148742	144350	145276	137861	139927	175954	183196	166845	171703	187903	187679	GLT	GLT [ C5 H8 N O4, tgt=38.88, overall=38.88 ]			(131.048, 12338.637)(164.08075, 9018.198)	11.6144
ASCORBATE	4581781	2688282	1870763	3902865	3902797	1	3997032	2474158	3648068	3602688	3369776	1	3987149	2294187	1	550766	3901163	3900768	3893419	1	2602392	2576497	3832166	3503719	4039605	3167220	1	1958258	1	1835551	ASCORBATE	ASCORBATE [ C6 H7 O6, tgt=67.57, overall=67.57 ]			(178.90736, 116.20813)(157.01689, 140.17)(180.6182, 10550.442)(161.80193, 20988.457)(197.69771, 217.83)(198.074, 214.98001)(177.05498, 6816.689)(178.0566, 416.88782)(185.01411, 118.507996)	2.91036
CPD-8204	3467555	3387749	3058679	3088275	3106789	3138098	4978622	4438782	4982448	5571888	3582534	3634709	5142559	5740330	4593077	4533050	5103691	5812926	5411022	5452856	4807380	4790770	5008577	5470217	4567707	4495913	4178805	4121507	3610394	3591771	CPD-8204	CPD-8204 [ C18 H31 O3, tgt=59.90, overall=59.90 ]			(277.21408, 108497.99)(278.2168, 16347.277)(279.2263, 4349.93)(313.4791, 10801.061)(314.27304, 1801.611)(318.20847, 2643.448)	15.429
CPD-9736	125993	119454	120913	118400	117411	115305	177390	143295	156812	156990	146626	127877	181777	137788	137020	131314	130381	143642	209095	168690	165846	168935	171737	161326	150165	131793	140835	140540	141908	143684	CPD-9736	CPD-9736 [ C8 H8 O5, tgt=43.20, overall=43.20 ]			(185.0429, 7856.5015)(170.04297, 441.7053)(185.06259, 8159.606)	2.2834
CPD-8203	3088402	2958835	1356001	1382559	2745824	1467975	1444170	1485066	3031496	2980309	2627315	2619520	3156089	3190615	2444422	2465868	3209983	3144218	3316159	3447422	3221398	3165771	3473007	3418539	2600445	2720462	2643090	2757288	1574446	1491660	CPD-8203	CPD-8203 [ C18 H31 O2, tgt=75.69, overall=75.69 ]			(279.22858, 7567.8047)(261.21912, 77801.49)(262.222, 12425.449)(263.23087, 832.8596)	15.8598
CPD-9739	884999	810725	858785	867904	858221	832268	1241879	1170664	1169983	1	1062876	1056517	1293974	1205318	1154588	1183546	1204692	1224653	1201445	1123360	1138007	1145426	1049666	1029094	843532	779828	1	777430	888871	899989	CPD-9739	CPD-9739 [ C7 H7 O3, tgt=40.50, overall=40.50 ]			(139.03787, 21235.627)(140.0444, 4040.2498)(121.027466, 18454.482)(140.04485, 4795.581)(140.0693, 1657.377)(144.07895, 360.0425)(147.02222, 9348.908)	3.9586
13-HYDROPEROXYOCTADECA-911-DIENOATE	1483466	1419272	962283	965406	1137458	1157786	1362702	1	1932740	1	1730463	1738574	1	1	1725138	1707178	1646466	1671890	1406088	1333767	1409750	1396594	1	1	2602190	2460625	1462749	1463825	1294625	1298222	13-HYDROPEROXYOCTADECA-911-DIENOATE	13-HYDROPEROXYOCTADECA-911-DIENOATE [ C18 H31 O4, tgt=55.65, overall=55.65 ]			(293.20847, 59866.562)(294.2114, 9029.755)(316.19315, 5193.6133)(317.20563, 878.838)	15.1552
CPD-9737	125993	119454	120913	118400	117411	115305	177390	143295	156812	156990	146626	127877	181777	137788	137020	131314	130381	143642	209095	168690	165846	168935	171737	161326	150165	131793	140835	140540	141908	143684	CPD-9737	CPD-9737 [ C8 H8 O5, tgt=43.20, overall=43.20 ]			(185.0429, 7856.5015)(170.04297, 441.7053)(185.06259, 8159.606)	2.2834
CPD-19897	1	320038	437998	136066	205529	218945	633553	648751	538377	632742	401205	361268	788068	784148	524051	534156	811323	832065	862030	853474	849308	844880	824189	832824	561563	571810	532462	513658	512832	495659	CPD-19897	CPD-19897 [ C22H29N2O3, tgt= ]			(351.21017, 25289.547)(352.21375, 3498.0227)(396.21796, 13814.257)(397.21945, 2044.1061)(374.19705, 27255.205)(375.19977, 2699.6)	9.712
PRO	1505730	1513659	1881844	1889095	1669359	1657360	1802745	1853389	2492806	2448957	1805063	1867286	2136210	1745784	1794797	1777918	1125931	1196664	1809345	1825125	1530859	1486050	1956087	1947654	2038840	2064423	2162221	2066948	1630947	1623160	PRO	PRO [ C5 H9 N O2, tgt=80.20, overall=80.20 ]			(117.06895, 228.85686)(133.10016, 32066.969)(134.10349, 1296.6833)(124.05115, 33965.74)(125.05447, 1912.1118)	8.128
CPD-19891	1	380312	199630	202878	286699	285019	230667	231791	417963	419378	349357	332284	308627	310845	1	414162	1	1	1	1	1	1	195799	1	538512	535140	700039	669111	682449	697292	CPD-19891	CPD-19891 [ C21 H25 N2 O3, tgt=37.04, overall=37.04 ]			(358.20212, 588.6925)(336.17682, 2486.577)(354.18735, 16631.67)(355.18976, 1890.0562)(371.22256, 18343.363)(372.22543, 1511.8029)(376.1683, 7306.5415)(377.17276, 981.91254)	6.979
CPD-19892	5180197	4812975	4911734	4828092	4684209	4649558	5682527	5152188	4426949	4273831	5815534	5688617	5002985	4681093	5289925	5288936	5513654	5467568	5867515	5356368	5575349	5508416	4685077	4513641	4870128	4453381	4109391	4043899	5619544	5538370	CPD-19892	CPD-19892 [ C22 H27 N2 O4, tgt=33.35, overall=33.35 ]			(387.27155, 33124.14)(388.20038, 5744.607)(369.35388, 4575.145)(370.18994, 637.05334)(371.20108, 1211.967)(402.2278, 2352.619)(403.2314, 201.58)(408.30807, 4095.6047)(411.189, 4502.2153)(389.1759, 6942.0522)(390.1728, 254.00752)	4.8802
CPD-19893	5180197	1	4911734	4828092	4684209	4649558	5682527	5152188	4426949	4273831	5815534	5688617	5002985	4681093	5289925	5288936	5513654	5467568	5867515	5356368	5575349	5508416	4685077	4513641	4870128	4453381	4109391	4043899	5619544	5538370	CPD-19893	CPD-19893 [ C22 H27 N2 O4, tgt=33.35, overall=33.35 ]			(387.2744, 33031.957)(388.20035, 5743.1597)(369.3637, 4536.571)(370.1899, 676.77277)(371.20105, 1246.6276)(402.2278, 2376.4453)(403.2314, 201.58)(408.31192, 4087.9014)(411.189, 4502.2153)(389.17587, 6938.1733)(390.1728, 254.00752)	4.88024
CPD-19894	356636	334445	299279	290783	303151	309082	319548	301445	296062	332547	261401	252771	381889	345619	283954	281505	278953	277682	273589	252934	192107	988007	285972	267035	316038	718616	331479	346445	278049	274487	CPD-19894	CPD-19894 [ C46 H56 N4 O10, tgt=82.41, overall=82.41 ]			(808.39526, 18145.86)(809.39777, 6447.4736)(810.39777, 1057.0413)(848.388, 3593.78)(849.3926, 1841.98)(830.37885, 16301.583)(831.3817, 7554.4326)(832.39105, 6354.9375)(833.39465, 3699.03)(834.3965, 682.82)	12.0776
CPD-19895	89115	84085	106126	115918	100127	98276	105063	103435	174452	169031	102539	104966	121439	115527	100497	115151	84193	83994	1	1	1	1	89606	1	98605	93915	102998	99702	1	1	CPD-19895	CPD-19895 [ C24 H31 N2 O5, tgt=71.16, overall=71.16 ]			(427.22623, 6957.6562)(428.2299, 880.76996)(448.2557, 351.32333)(428.25534, 481.44363)(436.21234, 35948.887)(437.2151, 6620.9404)	7.1306
DEOXYCYTIDINE	1	1	1	1	1	1	115540	1	1	1	1	1	110460	111649	95664	119492	122700	110830	126548	109597	1	1	103684	1	108762	109720	1	1	104886	1	DEOXYCYTIDINE	DEOXYCYTIDINE [ C9 H13 N3 O4, tgt= ]			(231.09972, 58167.71)(232.10266, 7142.6626)(231.09917, 57421.176)(232.10208, 7011.284)(255.09848, 24047.104)	9.1966
CPD-9744	116583	1	1	1	1	1	128159	182594	411924	400409	185931	104966	309905	295135	308362	301838	321810	315911	187100	164771	203189	202164	127466	127547	236502	206145	102998	99702	1	1	CPD-9744	CPD-9744 [ C25 H29 O5, tgt=28.85, overall=28.85 ]			(410.19574, 12915.177)(411.19775, 1551.26)(394.18835, 4546.04)(410.19717, 18104.559)(411.19724, 2070.56)(427.22665, 5923.668)(435.94846, 9682.466)(437.6879, 9941.928)(438.20746, 8192.095)(419.18585, 2417.0798)	7.9624
CPD-9745	147096	146876	253528	247819	198445	225597	319330	350811	433741	443563	1	350204	519675	530047	436323	439282	872134	864814	523093	561896	662059	645267	486503	474236	568275	604216	551655	541477	376556	393447	CPD-9745	CPD-9745 [ C26 H31 O5, tgt=44.62, overall=44.62 ]			(427.22638, 245.89)(441.24023, 18993.033)(442.24313, 3248.0918)(448.21185, 1600.3932)	7.53062
IPRONIAZID	155782	133415	1	139492	137752	131258	1	1	144714	133182	1	225047	1	122409	128918	131292	120137	1	117185	1	1	1	108970	1	194341	1	1	1	195901	130473	IPRONIAZID	IPRONIAZID [ C9 H13 N3 O, tgt=47.31, overall=47.31 ]			(179.10501, 6491.1294)(161.09479, 402.09253)(163.10936, 870.53064)(205.0966, 3191.46)	4.03211
10-BETA-HYDROXYTAXA-42011-DIEN-5-ALPH	1	1	1	1	1	1	363906	312349	327710	331615	1	1	460819	443737	299280	333700	478835	483377	488900	455725	399968	388602	455657	457020	323368	1	1	1	1	1	10-BETA-HYDROXYTAXA-42011-DIEN-5-ALPH	10-BETA-HYDROXYTAXA-42011-DIEN-5-ALPH [ C22 H34 O3, tgt=23.70, overall=23.70 ]			(346.25443, 14710.985)(347.25726, 1180.1282)	10.2484
CPD-9746	147096	146876	253528	247819	198445	225597	319330	350811	433741	443563	1	350204	519675	530047	436323	439282	872134	864814	523093	561896	662059	645267	486503	474236	568275	604216	551655	541477	376556	393447	CPD-9746	CPD-9746 [ C26 H31 O5, tgt=44.62, overall=44.62 ]			(427.22638, 245.89)(441.24023, 18993.033)(442.24313, 3248.0918)(448.21185, 1600.3932)	7.53062
CPD-9747	147096	146876	253528	247819	198445	225597	319330	350811	433741	443563	1	350204	519675	530047	436323	439282	872134	864814	523093	561896	662059	645267	486503	474236	568275	604216	551655	541477	376556	393447	CPD-9747	CPD-9747 [ C26 H31 O5, tgt=44.62, overall=44.62 ]			(427.22638, 245.89)(441.24023, 18993.033)(442.24313, 3248.0918)(448.21185, 1600.3932)	7.53062
2-ACETO-2-HYDROXY-BUTYRATE	883666	831856	1	1	1	1068529	1115624	1043172	1	1	1	1	1093486	1524041	1147028	1144679	1731637	1799791	304418	270814	259790	253343	255068	261237	1049085	950038	1064207	1069346	1066532	1071793	2-ACETO-2-HYDROXY-BUTYRATE	2-ACETO-2-HYDROXY-BUTYRATE [ C6 H9 O4, tgt=76.81, overall=76.81 ]			(145.0484, 5426.198)(127.0377, 21691.502)(128.04144, 856.24725)(147.8802, 19714.3)(148.88535, 1547.8137)(165.08958, 224441.11)(166.0927, 59559.69)(167.47188, 4025.8135)(169.0477, 2056.9)	7.5066
CPD-9741	116583	1	1	1	1	1	128159	182594	411924	400409	185931	104966	309905	295135	308362	301838	321810	315911	187100	164771	203189	202164	127466	127547	236502	206145	102998	99702	1	1	CPD-9741	CPD-9741 [ C25 H29 O5, tgt=28.85, overall=28.85 ]			(410.19574, 12915.177)(411.19775, 1551.26)(394.18835, 4546.04)(410.19717, 18104.559)(411.19724, 2070.56)(427.22665, 5923.668)(435.94846, 9682.466)(437.6879, 9941.928)(438.20746, 8192.095)(419.18585, 2417.0798)	7.9624
CPD-9742	116583	1	1	1	1	1	128159	182594	411924	400409	185931	104966	309905	295135	308362	301838	321810	315911	187100	164771	203189	202164	127466	127547	236502	206145	102998	99702	1	1	CPD-9742	CPD-9742 [ C25 H29 O5, tgt=28.85, overall=28.85 ]			(410.19574, 12915.177)(411.19775, 1551.26)(394.18835, 4546.04)(410.19717, 18104.559)(411.19724, 2070.56)(427.22665, 5923.668)(435.94846, 9682.466)(437.6879, 9941.928)(438.20746, 8192.095)(419.18585, 2417.0798)	7.9624
CPD-9743	116583	823701	748968	755353	789028	796779	128159	182594	411924	400409	185931	104966	309905	295135	308362	301838	321810	315911	187100	164771	203189	202164	127466	127547	236502	206145	102998	99702	952474	951076	CPD-9743	CPD-9743 [ C25 H29 O5, tgt=28.85, overall=28.85 ]			(410.19574, 12915.177)(411.19775, 1551.26)(392.63232, 36192.523)(393.19037, 6474.0283)(410.19717, 18104.559)(411.19724, 2070.56)(427.22665, 5923.668)(435.94846, 9682.466)(437.6879, 9941.928)(438.20746, 8192.095)(419.18585, 2417.0798)	8.06857
CPD-9748	147096	146876	253528	247819	198445	225597	319330	350811	433741	443563	1	350204	519675	530047	436323	439282	872134	864814	523093	561896	662059	645267	486503	474236	568275	604216	551655	541477	376556	393447	CPD-9748	CPD-9748 [ C26 H31 O5, tgt=44.62, overall=44.62 ]			(427.22638, 245.89)(441.24023, 18993.033)(442.24313, 3248.0918)(448.21185, 1600.3932)	7.53062
CPD-7609	120318	114222	187947	196660	161651	154921	270887	268858	1	1	1	204486	1	1	268787	256342	309719	321367	351716	341093	294013	283033	364324	357305	279629	269173	317135	292097	281212	250141	CPD-7609	CPD-7609 [ C30 H50 O2, tgt=49.71, overall=49.71 ]			(447.39774, 2526.6777)(425.37122, 3773.6094)(425.36984, 4869.9307)(464.42453, 8856.754)(465.42743, 1155.7888)(469.3801, 747.1299)(448.37302, 9500.017)(449.37552, 1755.8542)	21.4916
CPD-9749	977367	941071	575725	581279	762189	751147	1144159	1117588	1526123	1548060	1369407	1347907	991846	989671	1165641	1150845	1381889	1351516	1601983	1608960	1726569	1711780	1447656	1438081	2437772	2369562	1590338	1610423	1214897	1195718	CPD-9749	CPD-9749 [ C15 H15 O5, tgt=77.83, overall=77.83 ]			(257.07855, 47930.754)(258.08148, 5446.6484)(263.10297, 12902.57)(295.1301, 59055.145)(296.13318, 9815.344)(297.1369, 447.82)	16.1658
CPD-7608	120318	114222	187947	196660	161651	154921	270887	268858	1	1	1	204486	1	1	268787	256342	309719	321367	351716	341093	294013	283033	364324	357305	279629	269173	317135	292097	281212	250141	CPD-7608	CPD-7608 [ C30 H50 O2, tgt=49.71, overall=49.71 ]			(447.39774, 2526.6777)(425.37122, 3773.6094)(425.36984, 4869.9307)(464.42453, 8856.754)(465.42743, 1155.7888)(469.3801, 747.1299)(448.37302, 9500.017)(449.37552, 1755.8542)	21.4916
CONIFERYL-ALDEHYDE	2234762	2218356	2086775	2077709	2156413	2118630	3201813	3173956	3905290	3784947	1	3397560	3034143	2887158	3617922	3609128	4070835	3991084	3647297	3675271	4152809	4155938	3319768	3353463	4797590	4673672	4031720	3902372	3308265	3295028	CONIFERYL-ALDEHYDE	CONIFERYL-ALDEHYDE [ C10 H10 O3, tgt=53.72, overall=53.72 ]			(179.06915, 123936.086)(180.07207, 9987.749)	16.7352
ISOORIENTIN	511238	488018	592348	597309	531869	520174	1032213	1086022	757746	755961	834634	833775	1057344	1102660	947311	940204	1295002	1307279	1204337	1245963	1152853	1124648	1251328	1218554	621722	633414	519684	511850	1053715	1040284	ISOORIENTIN	ISOORIENTIN [ C21 H19 O11, tgt=44.93, overall=44.93 ]			(448.6918, 4370.059)(452.0968, 911.22675)(451.1002, 8992.669)(452.0975, 290.67)(465.13144, 46315.074)(466.13412, 7672.8296)(467.13535, 651.79645)	8.8664
CPD-7612	878700	822468	393171	1	503511	544939	1020340	983536	503131	480871	313335	300768	922964	986641	376752	370984	266564	265911	1	516100	813367	838165	1	314348	922631	948965	2005503	407467	2562222	2528510	CPD-7612	CPD-7612 [ C36 H57 O9, tgt=47.44, overall=47.44 ]			(633.398, 955.0433)(616.07294, 6371.4565)(617.075, 4148.66)(651.45135, 26440.023)(652.4542, 9422.762)(653.4585, 2331.479)(639.3946, 1773.36)(640.3977, 484.61)	21.6386
CPD-9752	180407	166915	158519	149950	169782	158373	156105	1	178479	174994	194427	195162	196847	177605	168017	172637	1	1	210002	182480	163333	160966	188110	183983	232593	207176	202752	201597	172889	167335	CPD-9752	CPD-9752 [ C15 H18 O2, tgt=40.42, overall=40.42 ]			(215.13693, 7618.894)(230.15538, 7451.3438)(256.12546, 376.8486)	2.2424
CPD-9758	1	1	1	1	1	1	183063	171345	1	1	1	187342	243894	1	1	184894	1	1	182429	1	1	1	1	1	220913	1	132334	1	186719	1	CPD-9758	CPD-9758 [ C12H20O2, tgt= ]			(201.16159, 533.675)(179.14145, 11958.736)(214.17827, 10688.141)(203.12582, 331.186)	6.4855
CPD-8229	2767212	2683871	2507180	2543271	2525218	2558216	4196150	4157792	4686344	4726246	3360686	3387748	4850746	4847425	4443341	4394220	4860965	4899862	4613057	4642234	4074549	4022273	4837374	413236	3919450	3817541	3866396	3833060	3325258	3352126	CPD-8229	CPD-8229 [ C18 H29 O2, tgt=74.20, overall=74.20 ]			(277.21408, 143823.6)(278.21683, 23026.518)(279.2259, 3446.5388)(261.21915, 13979.344)(262.22202, 2175.9722)(279.2279, 1246.03)(261.21814, 30544.775)(262.22104, 4475.89)(264.2287, 1057.16)	15.426
ADENINE	4723896	4556559	3347715	3292000	3821387	3762546	5345744	4572599	3760712	3689729	3395502	3342839	5247616	4594259	3671000	3661665	4362169	4359005	4616307	3930553	3930453	3912260	3697213	3614811	4966644	4409124	3644118	3523409	3714735	3624520	ADENINE	ADENINE [ C5 H5 N5, tgt=79.13, overall=79.13 ]			(137.05444, 1400.645)(136.06186, 144222.27)(137.05966, 10547.825)	2.0968
CPD-8228	2767212	2683871	2507180	2543271	2525218	2558216	4196150	4157792	4686344	4726246	3360686	3387748	4850746	4847425	4443341	4394220	4860965	4899862	4613057	4642234	4074549	4022273	4837374	413236	3919450	3817541	3866396	3833060	3325258	3352126	CPD-8228	CPD-8228 [ C18 H29 O2, tgt=74.20, overall=74.20 ]			(277.21408, 143823.6)(278.21683, 23026.518)(279.2259, 3446.5388)(261.21915, 13979.344)(262.22202, 2175.9722)(279.2279, 1246.03)(261.21814, 30544.775)(262.22104, 4475.89)(264.2287, 1057.16)	15.426
DIHYDROCHELIRUBINE	162194	159156	186104	172765	160088	162806	139957	110796	32580722	32000212	135322	137388	166519	132191	148234	149562	196506	184114	147040	29395840	29954708	29234776	132086	136561	113306	32040016	29401780	29215506	34729120	34227812	DIHYDROCHELIRUBINE	DIHYDROCHELIRUBINE [ C21 H17 N O5, tgt=68.54, overall=68.54 ]			(345.09805, 340180.38)(346.0993, 60392.996)(347.09903, 23011.059)(348.10086, 891.38226)(365.9372, 818.957)(367.14676, 1777.7568)(368.0785, 20162.479)(369.0806, 1620.07)	5.6148
CPD-7618	1791653	1709804	1873530	1881874	1768447	1748797	1801701	1778157	2159844	2427018	1889892	1844645	1870746	1915760	1741794	1735957	1627692	1611925	1630288	1633428	1455717	1431293	1672897	1660701	1972043	1943363	1970573	1973514	1722391	1730403	CPD-7618	CPD-7618 [ C10 H15 O2, tgt=71.64, overall=71.64 ]			(167.10493, 4137.482)(149.09499, 49531.79)(150.09805, 3148.601)(151.11034, 165.01332)(173.13068, 4154.7046)(151.11017, 689.52765)(171.24817, 7818.6753)(172.13971, 963.55)(191.10493, 21055.021)(192.10757, 1612.2336)(173.09413, 728.79816)	5.0034
CPD-7619	213967	199118	122237	114874	167705	163783	201750	212414	187757	183984	159643	153920	93472	100679	146126	149887	149277	147672	164042	159292	161277	156894	162852	164211	244218	143084	263804	256293	225102	224667	CPD-7619	CPD-7619 [ C7 H13 O2, tgt=25.64, overall=25.64 ]			(132.8993, 16291.741)(132.1015, 215361.66)(133.1043, 11751.305)(112.0833, 1177.1951)(114.0908, 549.44)(135.11531, 1550.4982)(149.13107, 1040.2759)(134.06717, 9813.679)(135.07841, 372.96167)	7.50327
CPD-9759	158155	156672	194483	194526	175181	175974	696870	153017	668502	638928	197091	616909	876841	178668	179024	177526	151681	152190	489057	226034	189660	184576	132748	83915	730295	577400	640491	634279	198278	194058	CPD-9759	CPD-9759 [ C15 H7 O6, tgt=21.35, overall=21.35 ]			(283.02997, 3821.8228)(265.0201, 1079.3268)(284.02756, 3598.8252)(285.0284, 891.3225)(301.06656, 10947.883)(287.052, 20274.664)(288.05502, 1049.8282)(306.0172, 613.6)(289.0141, 935.26624)(291.0131, 489.57004)	4.984
CPD-7614	1005701	899200	438288	429752	275827	711301	143445	904297	965372	758749	715250	607189	201873	835643	962359	687139	878540	831023	1300992	768715	881205	871485	159261	158052	1159538	969839	761424	241633	924612	135570	CPD-7614	CPD-7614 [ C11 H8 O, tgt=50.56, overall=50.56 ]			(139.75424, 7702.872)(141.05478, 624.2217)(158.07153, 9408.284)(159.06819, 7584.2515)(165.05325, 12788.358)	1.4
CPD-7615	564729	491329	1635116	1	1238879	504449	1544130	1472712	1684869	1680507	118676	123889	752747	481499	549363	508705	509229	489825	716721	529183	141774	209435	481871	493180	611535	556175	522078	500432	1949548	545299	CPD-7615	CPD-7615 [ C11 H7 O2, tgt=26.50, overall=26.50 ]			(171.04878, 4623.439)(154.37376, 3930.621)(156.04402, 4146.32)(174.16518, 19214.695)(173.39116, 5898.209)(175.05994, 4558.9004)(155.04118, 5827.59)(156.04338, 4207.5054)(189.07283, 68055.29)(190.075, 3877.4568)(171.06355, 4188.7)(197.04234, 880.595)(179.03235, 435.69333)	2.28673
CPD-7616	795107	738778	736271	752538	922411	472924	674939	1035826	1044388	269551	223335	402403	1196034	1114205	1130302	1146355	1122877	177901	1067505	346585	458308	1039164	921338	904557	559912	704314	271981	77397	774612	560259	CPD-7616	CPD-7616 [ C7 H6 O3, tgt=40.50, overall=40.50 ]			(140.03616, 6114.722)(142.04333, 1141.8099)(139.49289, 19162.91)(141.04408, 2202.1562)(121.02744, 18071.809)(157.07025, 65031.004)(158.07176, 10560.886)(159.06865, 8976.115)(139.05992, 13683.038)(140.05663, 7525.5806)(165.03181, 526.1529)(147.02226, 7233.7734)	2.84183
BERBERINE	1082100	1055828	1207541	1176190	1125658	1112919	989842	897323	1416637	1379957	1069964	1075549	1037145	927793	952601	978565	798129	791449	825353	761377	655864	653186	1	793196	1147924	997600	1080794	1087694	890600	876995	BERBERINE	BERBERINE [ C20 H18 N O4, tgt=63.07, overall=63.07 ]			(337.1246, 35598.473)(338.12756, 4489.6265)(339.1333, 195.9)	10.1506
CPD-8236	9418384	9641537	10586392	10349023	9851416	9990194	9876181	9737779	10755192	10647791	672361	11351576	10702454	10895937	10495578	10241005	11195558	11425034	10564437	10450243	11992939	671106	8634457	7996269	10795789	10669489	8654749	8545914	10979255	10765805	CPD-8236	CPD-8236 [ C15 H24, tgt=67.89, overall=67.89 ]			(205.19395, 248927.34)(206.19664, 32715.732)(207.19968, 725.297)	16.5222
5-10-METHENYL-THF	3455010	3426769	3765981	3693525	3472008	3458701	4273224	4503344	3529814	3498088	3603086	3613948	3833989	4170987	4562413	4563338	5291724	5119407	4162681	4390675	4659982	4594058	3916692	3865800	3889669	1	3702793	3658022	4486405	4407102	5-10-METHENYL-THF	5-10-METHENYL-THF [ C20 H20 N7 O6, tgt=34.88, overall=34.88 ]			(458.01956, 1517.6515)(459.1588, 2576.5288)(436.12497, 68712.88)(437.12552, 10770.963)(438.1262, 168.24)(457.70743, 1566.1282)(459.43665, 2357.89)(460.17654, 1178.175)(441.1451, 961.77686)(472.17477, 391.7004)(455.18307, 3567.0532)(457.06607, 541.9133)(477.13208, 1747.8148)	9.1636
CPD-8235	9418384	9641537	10586392	10349023	9851416	9990194	9876181	9737779	10755192	10647791	672361	11351576	10702454	10895937	10495578	10241005	11195558	11425034	10564437	10450243	11992939	671106	8634457	7996269	10795789	10669489	8654749	8545914	10979255	10765805	CPD-8235	CPD-8235 [ C15 H24, tgt=67.89, overall=67.89 ]			(205.19395, 248927.34)(206.19664, 32715.732)(207.19968, 725.297)	16.5222
CPD-8234	9418384	9641537	10586392	10349023	9851416	9990194	9876181	9737779	10755192	10647791	672361	11351576	10702454	10895937	10495578	10241005	11195558	11425034	10564437	10450243	11992939	671106	8634457	7996269	10795789	10669489	8654749	8545914	10979255	10765805	CPD-8234	CPD-8234 [ C15 H24, tgt=67.89, overall=67.89 ]			(205.19395, 248927.34)(206.19664, 32715.732)(207.19968, 725.297)	16.5222
CPD-8233	9418384	9641537	10586392	10349023	9851416	9990194	9876181	9737779	10755192	10647791	672361	11351576	10702454	10895937	10495578	10241005	11195558	11425034	10564437	10450243	11992939	671106	8634457	7996269	10795789	10669489	8654749	8545914	10979255	10765805	CPD-8233	CPD-8233 [ C15 H24, tgt=67.89, overall=67.89 ]			(205.19395, 248927.34)(206.19664, 32715.732)(207.19968, 725.297)	16.5222
CPD-8239	9418384	9641537	10586392	10349023	9851416	9990194	9876181	9737779	10755192	10647791	672361	11351576	10702454	10895937	10495578	10241005	11195558	11425034	10564437	10450243	11992939	671106	8634457	7996269	10795789	10669489	8654749	8545914	10979255	10765805	CPD-8239	CPD-8239 [ C15 H24, tgt=67.89, overall=67.89 ]			(205.19395, 248927.34)(206.19664, 32715.732)(207.19968, 725.297)	16.5222
CPD-7620	733025	3786959	3684118	1442631	2784081	3237705	3518137	996743	1965526	1	3546302	1381480	1669159	2456263	1376648	2608823	1161988	1157218	1420329	1473515	1185104	1174789	3174542	3171354	1558664	1603663	4005392	1055679	3431072	778541	CPD-7620	CPD-7620 [ C7 H14 O, tgt=75.69, overall=75.69 ]			(137.09499, 48971.375)(138.09816, 2903.571)(139.1097, 301.8)(119.08443, 9183.042)(120.08758, 572.43335)	6.89187
CPD-8238	9418384	9641537	10586392	10349023	9851416	9990194	9876181	9737779	10755192	10647791	672361	11351576	10702454	10895937	10495578	10241005	11195558	11425034	10564437	10450243	11992939	671106	8634457	7996269	10795789	10669489	8654749	8545914	10979255	10765805	CPD-8238	CPD-8238 [ C15 H24, tgt=67.89, overall=67.89 ]			(205.19395, 248927.34)(206.19664, 32715.732)(207.19968, 725.297)	16.5222
CPD-8237	9418384	9641537	10586392	10349023	9851416	9990194	9876181	9737779	10755192	10647791	672361	11351576	10702454	10895937	10495578	10241005	11195558	11425034	10564437	10450243	11992939	671106	8634457	7996269	10795789	10669489	8654749	8545914	10979255	10765805	CPD-8237	CPD-8237 [ C15 H24, tgt=67.89, overall=67.89 ]			(205.19395, 248927.34)(206.19664, 32715.732)(207.19968, 725.297)	16.5222
CPD-8231	2767212	2683871	2507180	2543271	2525218	2558216	4196150	4157792	4686344	4726246	3360686	3387748	4850746	4847425	4443341	4394220	4860965	4899862	4613057	4642234	4074549	4022273	4837374	413236	3919450	3817541	3866396	3833060	3325258	3352126	CPD-8231	CPD-8231 [ C18 H29 O2, tgt=74.20, overall=74.20 ]			(277.21408, 143823.6)(278.21683, 23026.518)(279.2259, 3446.5388)(261.21915, 13979.344)(262.22202, 2175.9722)(279.2279, 1246.03)(261.21814, 30544.775)(262.22104, 4475.89)(264.2287, 1057.16)	15.426
CPD-8232	9418384	9641537	10586392	10349023	9851416	9990194	9876181	9737779	10755192	10647791	672361	11351576	10702454	10895937	10495578	10241005	11195558	11425034	10564437	10450243	11992939	671106	8634457	7996269	10795789	10669489	8654749	8545914	10979255	10765805	CPD-8232	CPD-8232 [ C15 H24, tgt=67.89, overall=67.89 ]			(205.19395, 248927.34)(206.19664, 32715.732)(207.19968, 725.297)	16.5222
CPD-8230	9418384	9641537	10586392	10349023	9851416	9990194	9876181	9737779	10755192	10647791	672361	11351576	10702454	10895937	10495578	10241005	11195558	11425034	10564437	10450243	11992939	671106	8634457	7996269	10795789	10669489	8654749	8545914	10979255	10765805	CPD-8230	CPD-8230 [ C15 H24, tgt=67.89, overall=67.89 ]			(205.19395, 248927.34)(206.19664, 32715.732)(207.19968, 725.297)	16.5222
INDOLE-PROPIONATE	11094083	10664983	19447106	19337544	14592142	14550334	17925220	17075556	19409800	19386444	22202084	22813768	22414526	21921720	23986008	23811688	20294620	19906380	24917266	23633412	22173996	21872878	23121240	23141420	32032760	30224568	14954895	14862377	22333724	22303864	INDOLE-PROPIONATE	INDOLE-PROPIONATE [ C11 H10 N O2, tgt=91.62, overall=91.62 ]			(188.06976, 730517.94)(189.07253, 76528.99)(190.07465, 4642.811)(170.05853, 19978.787)(171.06175, 971.414)(208.73793, 7170.5474)(207.10095, 2557.24)	4.2982
CPD-4862	96130	1	98704	101388	1	1	278286	153575	166126	165189	112023	107913	433639	289776	1	1	224039	222029	500806	365852	437484	416990	283290	290406	277197	168158	95235	103470	1	1	CPD-4862	CPD-4862 [ C5 H10 N O3, tgt=35.99, overall=35.99 ]			(114.05394, 4641.5107)(135.07983, 3538.338)(116.0692, 2981.09)(150.09827, 6179.654)(137.04538, 9896.973)	3.273
CPD-4863	2371302	2282233	1340699	1321957	1868247	1832617	2514609	2445623	2168936	2149834	1938747	1857197	1231776	1203983	1635982	1619537	1705243	1671130	1968899	1914813	1811135	1837327	1938323	1927638	2697879	2577222	2936822	2860140	2536209	2531613	CPD-4863	CPD-4863 [ C5 H10 N O4, tgt=73.60, overall=73.60 ]			(150.06612, 2113.7876)(151.0737, 925.7658)(133.06407, 108070.766)(134.06718, 8610.503)(166.0933, 96441.36)(167.09541, 6313.599)	7.895
CPD-7227	10407187	10313102	6952416	6984787	8630386	8505572	12008230	11907033	16006958	15865146	14171051	14209759	10818070	10711171	12224364	12366267	14873535	14502697	2321788	2360788	17733158	2288349	2327835	14767980	2839063	2828324	16847796	16832884	2251834	2228754	CPD-7227	CPD-7227 [ C12 H19 N2 O7, tgt=88.73, overall=88.73 ]			(285.10925, 17158.617)(286.118, 359075.84)(287.1207, 55077.57)(288.12283, 4892.5635)	15.1527
CPD-7228	1261745	1255509	1714064	1691653	1466859	1478128	2018432	1919661	2246157	1	1995175	1	2972661	2760481	2693354	2692477	3003422	3022937	2998166	2880281	2898412	2893588	2761836	2850159	393280	317639	266247	261271	1	1	CPD-7228	CPD-7228 [ C12 H17 N2 O7, tgt=33.82, overall=33.82 ]			(284.0954, 101789.305)(285.09787, 9612.605)(286.09882, 795.3661)(319.1299, 675.53)(301.123, 1551.2025)(328.32825, 32126.938)(307.5823, 763.19006)(308.0883, 1170.08)	9.15223
CPD-1089	563039	674393	676842	1	667656	656591	1895460	1947723	1971251	2536583	1956726	1	847782	530893	662858	679876	1	571930	1906947	1899341	1600143	921725	2023341	2004538	553539	1	1	1	683851	677154	CPD-1089	CPD-1089 [ C10 H14 O, tgt=68.22, overall=68.22 ]			(151.11, 1711.5492)(133.10011, 28018.438)(134.1034, 1225.9591)(155.1416, 2105.8738)	6.6504
threo-ds-iso-citrate	1	4328617	2790307	1	2574131	3255610	3486394	2765830	3682138	3605298	2737710	2620337	3171095	2616146	3080244	2860252	2664444	2690112	1	1	1	4158169	2887438	2739342	4239856	971119	2964310	2851631	2845020	2764812	threo-ds-iso-citrate	threo-ds-iso-citrate [ C6 H8 O7, tgt=36.69, overall=36.69 ]			(196.24097, 109.090004)(175.01668, 26695.752)(179.03247, 131.68399)(197.04286, 141.00667)(177.0329, 66.46)(213.90437, 254.05127)(212.73906, 1203.09)(213.73586, 855.9533)(214.0682, 349.91)(195.33955, 138.69286)(195.0632, 15.33)(215.02028, 192.98)(197.0039, 3018.048)	1.01568
CPD-10358	972178	922152	1760242	1745261	1353361	1301931	213033	1	1	1	268705	1	601050	1	1012843	1010392	543910	541798	233023	238847	1	1	188206	193009	553314	1	1	1	418842	410448	CPD-10358	CPD-10358 [ C15 H14 O7, tgt=50.97, overall=50.97 ]			(289.0676, 26934.309)(290.0712, 2748.2803)(324.10428, 1973.3733)(308.0869, 4321.0747)	4.684
7-O-BETA-D-APIOFURANOSYL-12-BETA-D-GLU	271582	285202	287693	294666	293095	281884	395256	280422	262962	257144	228622	228640	300239	217208	222807	234115	253756	263982	401647	295003	272192	279152	258053	254247	279815	1	225407	218911	292623	287392	7-O-BETA-D-APIOFURANOSYL-12-BETA-D-GLU	7-O-BETA-D-APIOFURANOSYL-12-BETA-D-GLU [ C26 H28 O14, tgt=18.70, overall=18.70 ]			(547.15076, 14438.218)(548.1536, 2301.162)(549.1519, 321.24)	5.5826
DIHYDROFOLATE	6796410	6514327	4395500	4813779	5535915	5443958	6349700	6125482	3652913	5094573	7334014	6949715	6290309	6500615	5811592	6460946	1028619	6318893	5194149	6142473	1	1858817	6837155	5243244	6882416	6815055	6063389	5938845	7376183	7340298	DIHYDROFOLATE	DIHYDROFOLATE [ C19 H19 N7 O6, tgt=55.97, overall=55.97 ]			(446.15958, 532.47186)(425.14017, 2658.551)(425.3079, 2278.063)(459.1696, 3091.09)(441.16843, 102900.75)(442.17096, 17477.293)(443.17242, 1792.3724)(465.1452, 87.15)	7.07
ILE	1	2888452	2933154	2869154	2732947	2841103	6582295	4929063	3523939	3562505	165097	4854786	7474570	5101992	4814191	4554187	5720725	5331194	9588861	154721	103323	109982	143827	180045	9354730	5843117	4721579	4494119	5603808	6223431	ILE	ILE [ C6 H13 N O2, tgt=84.35, overall=84.35 ]			(133.09978, 47476.676)(134.10306, 2945.2969)(132.10141, 204442.88)(133.10423, 11128.6)(114.09052, 571.38)(149.13055, 6552.6353)	3.33224
D-CYSTEINE	278595	278117	227586	182162	170905	212970	241039	234940	199283	186900	156158	135269	322192	244219	222056	139464	177148	171113	220557	212616	222418	215264	196382	200083	308363	216765	192815	213162	194644	102709	D-CYSTEINE	D-CYSTEINE [ C3 H7 N O2 S, tgt=45.25, overall=45.25 ]			(140.05646, 7153.7544)(141.05331, 729.515)(129.99332, 28032.385)(130.99896, 883.1693)	1.399
DIHYDROXYINDOLE	517579	477420	693663	500703	476149	657048	906790	150969	187026	755221	795925	800963	937754	144127	723797	130279	903611	867702	1254128	1013145	893556	891823	937726	951868	1207973	964734	827605	797552	958476	905173	DIHYDROXYINDOLE	DIHYDROXYINDOLE [ C8 H7 N O2, tgt=46.09, overall=46.09 ]			(150.05373, 4638.399)(152.05592, 5416.4644)(137.05829, 4531.5547)	2.6988
CPD-6161	99457	77501	91903	1	1	85641	154952	86193	99999	84531	96751	1	1	1	96549	83724	96006	85068	169461	90677	81744	86089	84260	91342	147364	96958	90736	1	95587	1	CPD-6161	CPD-6161 [ C12 H13 N5 O, tgt=47.08, overall=47.08 ]			(243.10536, 7624.1855)(244.10669, 891.7065)(245.1042, 619.495)(266.1575, 5373.831)	1.3832
PAMIDRONATE	941403	880134	612996	607535	730063	722419	1011281	721137	531358	523536	425267	438145	1205646	932756	587184	569599	465876	451914	786252	599180	714933	708240	519769	489084	973132	760000	533220	518640	484512	477492	PAMIDRONATE	PAMIDRONATE [ C3 H10 N O7 P2, tgt=32.45, overall=32.45 ]			(239.014, 431.24)(239.02818, 1021.4893)(256.9803, 49411.375)(257.98145, 7981.625)(258.97913, 6609.1157)	1.3954
CPD-4841	174369	175169	1	1	97215	110705	197615	124927	1	125993	1	109743	210202	164578	127925	110240	124467	1	179483	117703	131143	134431	116424	106453	191312	161308	103098	129208	111714	1	CPD-4841	CPD-4841 [ C7 H3 N O4, tgt=47.04, overall=47.04 ]			(167.01112, 2401.572)(168.0102, 393.99)(146.99335, 2160.5623)(184.0483, 659.88007)(165.03175, 516.1982)(187.99092, 1468.1244)	1.42939
CPD-7207	1	1	402291	399484	1	1	508396	460639	1131570	1117923	1039722	1050331	796939	713410	497375	517213	1	1	607297	553311	390499	370307	663252	641968	111885	1	339469	328117	1	1	CPD-7207	CPD-7207 [ C17 H20 O2, tgt=17.81, overall=17.81 ]			(239.242, 21836.125)(240.48637, 1979.8383)(256.17264, 1606.2289)(261.12814, 3066.6829)	2.97314
CPD-7203	11614788	11303172	12680869	12615163	11618490	11467303	13084897	11447583	14983751	14840961	11314012	11406096	14327425	12693592	11447183	11316280	9951270	9885765	11376982	10164473	8086454	7858845	10998933	10781823	12937832	11373606	12319586	11974388	10385036	10133742	CPD-7203	CPD-7203 [ C13 H20 O3, tgt=76.45, overall=76.45 ]			(207.13693, 456178.1)(208.1397, 52795.957)(245.18314, 2406.5867)(225.14662, 37833.14)(226.14967, 3342.894)(227.15941, 325.31253)	5.0158
CPD-10345	1	1	1	965444	1	970350	545872	391150	1	432012	506370	1	1	375344	379692	1	398561	396307	1093716	450320	1	1	421962	400160	391152	333060	387882	370699	425930	620417	CPD-10345	CPD-10345 [ C27 H29 O14, tgt=83.82, overall=83.82 ]			(577.15784, 5430.281)(578.1489, 3994.0032)(579.58105, 15974.604)(580.1821, 3873.2925)(581.1798, 478.83)(595.1722, 152.9)(578.4797, 19100.684)(580.191, 6147.831)(581.18286, 699.93506)	6.4971
CPD-7206	914134	907181	1	1	1	1	1073304	1035212	1	1	1	1	925046	908788	1	1	1	1	1	1	944847	965832	1	1	956400	949776	1	1	1	1	CPD-7206	CPD-7206 [ C30 H40 O, tgt=21.23, overall=21.23 ]			(441.29138, 788.095)(435.35468, 40063.63)(436.35736, 7967.2295)(419.31, 2764.1401)	23.1174
CPD-7200	1	2759046	2652645	1972489	1771920	2290457	2561158	2563108	3307754	3434949	2719363	2655410	3178318	3218869	2459054	2478311	1970660	2001548	2841647	2997229	2380423	2370296	1358519	1342416	3815233	3034953	3051102	2543092	2784490	2844266	CPD-7200	CPD-7200 [ C13 H20 O2, tgt=66.35, overall=66.35 ]			(209.15019, 54063.246)(210.15381, 5529.4087)(191.14001, 9346.2705)(209.15172, 16953.654)(210.15486, 565.82324)(191.14171, 55209.926)(192.14473, 5423.084)	7.32566
CPD-7201	11614788	11303172	12680869	12615163	11618490	11467303	13084897	11447583	14983751	14840961	11314012	11406096	14327425	12693592	11447183	11316280	9951270	9885765	11376982	10164473	8086454	7858845	10998933	10781823	12937832	11373606	12319586	11974388	10385036	10133742	CPD-7201	CPD-7201 [ C13 H20 O3, tgt=76.45, overall=76.45 ]			(207.13693, 456178.1)(208.1397, 52795.957)(245.18314, 2406.5867)(225.14662, 37833.14)(226.14967, 3342.894)(227.15941, 325.31253)	5.0158
BENZOATE	381441	348447	333826	340566	347596	346995	476693	481099	452132	461510	435266	402143	543537	532584	489983	496744	514196	503178	487216	474271	494272	484497	435037	432053	328661	332000	331278	327889	363498	363498	BENZOATE	BENZOATE [ C7 H5 O2, tgt=40.50, overall=40.50 ]			(121.027466, 18983.572)(140.06932, 1675.241)(144.07886, 413.795)(147.02223, 9258.988)	3.9568
UBIQUINONE-8	762167	708460	1661580	1	1111116	1084980	734744	710587	1339984	1279901	1450844	1429959	712080	681199	1556681	1500891	1555942	1559733	1570946	1485078	1014595	1025751	1598651	1537179	862079	834136	1649046	1598107	1610065	1583139	UBIQUINONE-8	UBIQUINONE-8 [ C49 H74 O4, tgt=36.91, overall=36.91 ]			(728.5782, 489.0283)(732.55615, 65129.117)(728.58014, 29889.602)(729.58276, 10056.066)(730.5848, 1195.08)(732.5532, 43570.1)(733.5505, 16814.047)(734.5578, 3798.405)	20.6466
CPD-1063	2270644	2197389	2489583	2001509	1	1733479	1	2163249	2556522	2112173	1879819	1	1	1	2606643	1792734	1	1996782	2265917	2004027	1927713	1992169	2320222	2435697	2253599	1807624	2136559	2492311	2600290	1	CPD-1063	CPD-1063 [ C6 H11 O7 P S, tgt=36.65, overall=36.65 ]			(259.0094, 748.37866)(244.73877, 7405.373)(244.00119, 8232.085)(244.9986, 2862.565)(280.0295, 476.48)	1.39774
7-O-METHYLVITEXIN-2-O-B-L-RHAMNOSIDE	2673172	2542694	511806	505646	1	3618881	2275937	2172708	3709840	3686734	3464649	3520765	3064574	2917423	3472869	3448383	1987774	1948293	2360241	2185033	2341434	2351926	1852393	1797182	2638503	2434826	1341221	1249612	1750548	1747597	7-O-METHYLVITEXIN-2-O-B-L-RHAMNOSIDE	7-O-METHYLVITEXIN-2-O-B-L-RHAMNOSIDE [ C28 H32 O14, tgt=68.07, overall=68.07 ]			(578.1262, 4635.6323)(579.2027, 1115.8131)(612.2207, 4111.1333)(613.2237, 891.55664)(593.212, 899.6173)(616.5449, 1538.3307)(617.1761, 731.60614)	7.44087
OCTADEC-9-ENE-118-DIOIC-ACID	2055636	1870547	1295176	1313484	1539807	1548092	3199100	3117419	1	2996745	2868232	2857189	4199354	4061386	3103698	3062069	3735115	3750332	3462932	3414920	2950463	1	3669588	3630106	3719686	4073884	2166544	2167296	2457638	2415713	OCTADEC-9-ENE-118-DIOIC-ACID	OCTADEC-9-ENE-118-DIOIC-ACID [ C18 H30 O4, tgt=66.44, overall=66.44 ]			(333.199, 23382.41)(334.20288, 9150.285)(335.21362, 387.4475)(293.20834, 43719.61)(294.21127, 5945.582)(295.22247, 344.28275)(328.2442, 5470.3)(329.2475, 105.33)(315.18985, 34424.836)(316.1928, 4494.429)(317.20416, 652.6169)	15.6311
CPD-10356	1071226	1060584	989424	1007075	1	1000490	1626631	1597141	5468707	5413575	1022424	1028953	2014839	1961836	1429821	1433759	1736142	1719455	3920582	3839299	1371811	5123611	3719133	3672480	856240	851081	849278	853362	1150235	1150356	CPD-10356	CPD-10356 [ C20 H28 O4, tgt=58.79, overall=58.79 ]			(315.2816, 30812.605)(316.19296, 3932.9)(317.20468, 671.74384)(355.18228, 869.64996)(316.9185, 5496.9688)(316.192, 4021.76)(317.2031, 559.83)(333.19943, 45031.844)(334.2026, 9230.692)	15.6832
CPD-6141	1607041	1540433	1650352	1657525	1585132	1598488	1509723	1539298	1	1	1866400	1896456	1735152	1741400	1673334	1686282	1832031	1799530	1639960	1709681	1974179	1962869	1436593	1304257	1686263	1705855	1407002	1392812	1792463	1783862	CPD-6141	CPD-6141 [ C4 H9 N O2, tgt=53.07, overall=53.07 ]			(105.069046, 3082.5645)(121.10034, 39663.6)(122.10347, 1893.9749)	16.5214
CPD-6142	556354	842330	907193	603401	841434	855378	973252	875467	1129646	1118514	905670	901031	1092518	1067611	918351	888226	1	1	3993536	3746847	2735342	1	927593	931178	996150	564825	2659839	1885230	810771	801676	CPD-6142	CPD-6142 [ C5 H11 N O2, tgt=72.34, overall=72.34 ]			(119.08458, 17744.084)(120.08773, 681.73425)(135.11575, 32296.74)(136.11897, 1641.0784)	5.0166
CPD-10349	271582	285202	287693	294666	293095	281884	395256	280422	262962	257144	228622	228640	300239	217208	222807	234115	253756	263982	401647	295003	272192	279152	258053	254247	279815	1	225407	218911	292623	287392	CPD-10349	CPD-10349 [ C26 H28 O14, tgt=18.70, overall=18.70 ]			(547.15076, 14438.218)(548.1536, 2301.162)(549.1519, 321.24)	5.5826
CPD-10347	622460	553997	1	550734	549794	528727	556174	468857	508421	499985	713873	694131	633947	605756	1	623228	557624	536605	854603	750293	788600	777568	632390	1	911720	802578	511684	505806	651124	653408	CPD-10347	CPD-10347 [ C27 H30 O15, tgt=58.45, overall=58.45 ]			(595.1588, 15986.243)(596.16144, 3348.71)(577.1616, 1517.3134)	5.442
XANTHURENATE	118143	100314	106232	100939	103416	108999	126671	1	100199	106954	1	1	132484	1	148497	154313	131849	137290	203308	158291	153451	139731	119980	112670	226297	166432	127248	114140	1	1	XANTHURENATE	XANTHURENATE [ C10 H5 N O4, tgt=47.49, overall=47.49 ]			(222.05865, 2446.1033)(226.00903, 7820.554)(227.0142, 290.51)	2.06
CPD-10320	3467555	3387749	3058679	3088275	3106789	3138098	4978622	4438782	4982448	5571888	3582534	3634709	5142559	5740330	4593077	4533050	5103691	5812926	5411022	5452856	4807380	4790770	5008577	5470217	4567707	4495913	4178805	4121507	3610394	3591771	CPD-10320	CPD-10320 [ C18 H31 O3, tgt=59.90, overall=59.90 ]			(277.21408, 108497.99)(278.2168, 16347.277)(279.2263, 4349.93)(313.4791, 10801.061)(314.27304, 1801.611)(318.20847, 2643.448)	15.429
CPD-12573	503104	474521	1111940	1115165	799907	789369	453914	1	692888	698425	1007405	904953	575011	531298	830711	830114	468444	465498	685171	625006	1	1	1	559653	484398	440784	1	1	709362	684026	CPD-12573	CPD-12573 [ C18 H15 O7, tgt=46.99, overall=46.99 ]			(343.07776, 16300.411)(343.0978, 6509.5317)	8.4462
4-METHYL-MYO-INOSITOL	1804273	1756778	1777697	1780351	1672570	1665418	1820890	1743977	1607817	1578584	1486828	1524752	1724724	1712911	1627264	1615012	781411	1610062	1690372	1616552	1579080	1549310	1508073	1499741	1913128	1856107	1791365	1772298	1750978	1716399	4-METHYL-MYO-INOSITOL	4-METHYL-MYO-INOSITOL [ C7 H14 O6, tgt=47.36, overall=47.36 ]			(177.06842, 8318.658)(181.08432, 158.68001)(220.89203, 109.87864)(221.0742, 196.55)(180.08517, 812.25336)(199.0945, 110.85)(199.05812, 2974.648)(197.1153, 104.89)	3.9874
CPD-12571	3059184	3017197	1	1	1	1	1	257257	3620014	3609819	4100908	3996851	2371737	1	4045632	3929562	2667198	2730694	2570464	1	2588383	2557303	2372935	2234197	286436	269402	1	281749	2764049	1	CPD-12571	CPD-12571 [ C16 H11 O7, tgt=37.97, overall=37.97 ]			(333.08292, 1594.5748)(315.79935, 44753.92)(316.46164, 7815.6274)(317.08755, 962.15826)	11.8344
CANAVANINE	851925	755577	1001939	948548	826933	848953	1112859	849230	879343	872514	1115626	1094443	1207733	915819	972301	973316	1080270	1048492	1880016	1450096	1469191	1424448	1237249	1228269	1595412	1181756	669874	659117	1128024	1143013	CANAVANINE	CANAVANINE [ C5 H13 N4 O3, tgt=68.67, overall=68.67 ]			(182.07968, 46660.613)(183.08261, 3214.0703)	2.1298
CPD-12572	610973	593903	650838	641235	634550	641660	523885	525751	479499	555254	1	567885	551653	556786	605164	529552	574824	585566	529728	458817	442482	1	1	1	566988	461440	501271	424331	506184	505700	CPD-12572	CPD-12572 [ C17 H13 O7, tgt=55.98, overall=55.98 ]			(347.0993, 26344.969)(348.1012, 1141.8335)	13.9673
CPD-10540	4310785	4034435	4096156	3498214	4333036	4278885	3937137	3927387	6268785	6084604	4278049	4311133	2474845	2515263	3203362	3223444	1705906	1701322	1997392	2029242	1297602	1279249	2556034	2493470	1483032	1488819	2676052	2630185	1959228	1913609	CPD-10540	CPD-10540 [ C29 H44 O8, tgt=80.90, overall=80.90 ]			(543.2904, 866.0514)(503.29877, 4528.112)(525.2807, 3761.4717)(526.2812, 485.96667)(520.327, 75734.95)(521.3294, 14925.431)(522.331, 2003.332)	5.512
2-CIS6-TRANS-FARNESOL	9982493	9641537	10586392	10349023	9851416	9990194	9876181	9737779	10755192	10647791	672361	11351576	10702454	10895937	10495578	10241005	11195558	11425034	10564437	10450243	11992939	670861	8634457	7996269	10795789	10669489	8654749	8545914	10979255	10765805	2-CIS6-TRANS-FARNESOL	2-CIS6-TRANS-FARNESOL [ C15 H26 O, tgt=67.89, overall=67.89 ]			(205.19395, 248927.34)(206.19664, 32715.732)(207.19968, 725.297)	16.5222
CPD-10536	15853065	14692180	13045054	13360155	21461318	21196948	14826995	14113380	13386908	20608836	14088357	13214013	20556600	20872880	10728221	10607957	19536980	19616950	20785740	20512788	21361320	23628984	19445036	19133768	13078352	13825266	13260103	13504003	12453224	12483702	CPD-10536	CPD-10536 [ C29 H44 O9, tgt=74.27, overall=74.27 ]			(537.2986, 365795.97)(538.301, 94881.97)(539.30194, 15225.786)(540.3001, 3923.6575)(541.30255, 547.4417)	15.7254
CPD-12568	9982493	9641537	10586392	10349023	9851416	9990194	9876181	9737779	10755192	10647791	672361	11351576	10702454	10895937	10495578	10241005	11195558	11425034	10564437	10450243	11992939	670861	8634457	7996269	10795789	10669489	8654749	8545914	10979255	10765805	CPD-12568	CPD-12568 [ C15 H26 O, tgt=67.89, overall=67.89 ]			(205.19395, 248927.34)(206.19664, 32715.732)(207.19968, 725.297)	16.5222
CPD-10538	4310785	4034435	4096156	3498214	4333036	4278885	3937137	3927387	6268785	6084604	4278049	4311133	2474845	2515263	3203362	3223444	1705906	1701322	1997392	2029242	1297602	1279249	2556034	2493470	1483032	1488819	2676052	2630185	1959228	1913609	CPD-10538	CPD-10538 [ C29 H44 O8, tgt=80.90, overall=80.90 ]			(543.2904, 866.0514)(503.29877, 4528.112)(525.2807, 3761.4717)(526.2812, 485.96667)(520.327, 75734.95)(521.3294, 14925.431)(522.331, 2003.332)	5.512
CPD-10537	827788	781457	1007649	985861	838510	851205	1481713	1353327	1528999	1511352	858465	834233	1393141	1302878	1179022	1143239	1261837	1271446	1389895	1291339	1089026	1131485	1402853	1325844	1040181	989580	805361	793720	787000	741159	CPD-10537	CPD-10537 [ C23 H34 O4, tgt=53.00, overall=53.00 ]			(375.24643, 46002.188)(376.2492, 7820.385)	17.6854
CPD-13229	46041248	41660584	40159000	38322644	37287688	36948416	51073396	40723284	40096160	38510688	40733312	40075924	51846200	42296856	42149536	40387964	41884752	40751940	53336820	43592836	39253756	37917160	39824196	38500884	55954720	44212364	41738088	39994140	43126392	42958312	CPD-13229	CPD-13229 [ C5 H10 O, tgt=86.93, overall=86.93 ]			(104.106865, 981825.8)(105.10976, 45469.797)(106.1115, 1066.33)	1.6166
CPD-10539	185236	120907	1	143276	128913	126592	147538	116103	1	252277	167029	155379	188714	167369	172529	1	294061	298238	293029	164956	273367	271136	162516	155170	282947	257539	185648	185124	154037	145592	CPD-10539	CPD-10539 [ C35 H54 O13, tgt=24.60, overall=24.60 ]			(701.8755, 3952.4941)(704.5452, 2343.0579)(706.4894, 2356.4106)(687.74506, 5522.8706)(688.33044, 180.155)	12.4124
CPD-10318	118711	120915	1	1	107567	98801	1	1	1	1	1	1	91078	85029	1	1	1	1	1	1	666698	656062	1	1	95603	107157	121398	124583	1	1	CPD-10318	CPD-10318 [ C24 H21 O13, tgt=23.90, overall=23.90 ]			(538.1379, 1793.61)(539.15515, 140.105)(521.12305, 4900.3286)(522.1261, 357.73)(521.1221, 7881.0156)(522.12445, 1991.14)	13.5712
CPD-1041	116244	93326	110709	107705	100051	95060	154727	110082	110754	98745	111227	109606	185194	121562	110993	90036	110182	98670	165878	108552	97008	99528	101844	105635	157674	104880	95397	102570	115274	123273	CPD-1041	CPD-1041 [ C8 H9 N O2, tgt=42.94, overall=42.94 ]			(139.0725, 1617.8267)(174.0555, 4541.2207)(156.04385, 4305.325)	1.394
DIHYDRONEOPTERIN-P	6188998	5997628	6283553	6247706	6117864	6132330	6273594	6318633	6484057	6480451	6686020	6578275	6168380	6235905	6467743	6451203	6070459	6108317	5846739	5915314	6728252	6803854	5241399	5160256	6197883	6307416	4869355	4912733	6060145	5982960	DIHYDRONEOPTERIN-P	DIHYDRONEOPTERIN-P [ C9 H12 N5 O7 P, tgt=94.94, overall=94.94 ]			(351.08084, 171655.44)(352.0834, 26808.354)(353.0854, 2470.4104)	15.6844
CPD-10330	220364	222475	272973	266275	269975	226574	229156	206689	254144	246170	1	1	229618	181117	1	178060	1	1	250491	1	1	1	1	1	342717	257657	219478	195329	1	1	CPD-10330	CPD-10330 [ C5 H10 O5, tgt=43.80, overall=43.80 ]			(150.0539, 7047.5386)(151.0603, 144.185)(137.05736, 4852.0947)(137.05939, 5802.113)(168.0904, 738.69995)	2.3134
78-dihydropteroate	192930	291136	685664	733662	295782	257847	325421	295362	262280	201107	1	273712	334497	241295	1	179978	173969	150108	1	1	1	1	1	135642	288526	132484	237730	269631	222363	219921	78-dihydropteroate	78-dihydropteroate [ C14 H14 N6 O3, tgt=37.83, overall=37.83 ]			(314.11487, 1508.8881)(301.121, 1139.64)(301.1227, 14745.908)(302.12164, 7133.3555)(333.14548, 1342.6957)(334.142, 6629.393)(317.71313, 5380.5264)(318.787, 405.22546)(322.75177, 1068.8744)(324.102, 1074.696)	3.0221
CPD-10332	13791362	12962548	7552352	7549898	10222868	10180006	15064737	1	12290603	12098081	10068761	1	7488702	7325272	9364369	8757047	9892536	9727000	11637141	10937123	9987564	10006013	9922228	10262894	15517319	14043098	16095544	15543988	13735560	13591249	CPD-10332	CPD-10332 [ C20 H26 O6, tgt=49.16, overall=49.16 ]			(344.16776, 461287.66)(345.17023, 71010.93)(346.17123, 9842.447)(368.187, 868.2874)(362.18954, 433.19626)	7.8974
CPD-13248	1	1	1	1	1	1	1	1	1	1	1	1	1	1	1	1	1	1	1	1	1	1	1	1	247388	1	1	1	1	1	CPD-13248	CPD-13248 [ C15 H21 O2, tgt= ]			(215.137, 13553.03)(260.1575, 894.48)	2.06675
CPD-13245	410170	473061	566217	566731	484186	478166	1	386339	481911	490118	566590	533854	429475	415289	557054	461481	403750	357521	364578	346060	360467	357408	333860	309466	342285	336113	318643	320662	376796	364971	CPD-13245	CPD-13245 [ C16 H12 N O3 S, tgt=54.69, overall=54.69 ]			(301.0671, 4101.841)(316.08627, 21470.758)(317.08856, 1450.9104)	12.2212
L-DOPACHROME	1	209929	1	1	1	118409	250877	187128	1	1	115569	1	357607	228229	1	1	1	1	319796	148194	245543	199420	133405	61560	250564	155248	1	1	1	1	L-DOPACHROME	L-DOPACHROME [ C9 H6 N O4, tgt=42.40, overall=42.40 ]			(175.01805, 3341.6575)(193.0322, 570.755)(177.0324, 3499.8074)(210.59494, 2821.4006)(213.57031, 1046.835)(215.0735, 2872.8733)(216.08769, 10975.614)(220.02696, 506.40002)	2.00896
CPD-19959	26310232	25668648	15390905	15114253	20672542	20584324	27935104	27159744	24269844	24003340	20463160	20956468	14315580	14061510	1	1	1	1	1	21310304	1	20307500	20394806	20911588	29553796	28120436	32424674	31498914	28178104	28188998	CPD-19959	CPD-19959 [ C10 H12 O2, tgt=60.98, overall=60.98 ]			(165.09036, 1077345.4)(166.09334, 98798.46)(167.09541, 6480.2573)	7.897
CPD-19958	1	1	1	1	1	1	184309	91909	1	1	1	1	1	1	1	515313	1	1874481	79689	1	1	1	1	1	424829	1	104933	175753	295174	248557	CPD-19958	CPD-19958 [ C5 H10 O2, tgt=45.85, overall=45.85 ]			(107.084816, 3834.873)(125.05453, 3970.0078)(107.045425, 7015.25)	6.881
CPD-19956	171704	146192	1	150649	138653	153162	133857	180685	171650	294660	271858	197577	230920	249518	132037	145338	1	232045	206158	206344	243650	240038	229400	131226	243309	143084	238715	155327	137350	137158	CPD-19956	CPD-19956 [ C7 H14 O2, tgt=43.72, overall=43.72 ]			(134.7134, 30937.723)(133.1043, 11751.305)(114.0907, 3509.69)(135.11565, 8151.274)(153.08963, 5191.049)(135.07901, 5162.5186)	6.25837
COUMARATE	15678526	14779182	24409680	24563804	21217928	20547214	14847482	13638327	18367648	18484676	21029736	20476540	16547328	15290293	20741060	20668082	14088265	14069624	18460128	16984952	17704540	17417644	15535784	15377769	14237571	12819460	8956367	8781991	18774692	18014370	COUMARATE	COUMARATE [ C9 H7 O3, tgt=93.85, overall=93.85 ]			(163.0383, 528321.0)(164.04105, 42571.117)(165.04315, 2618.2478)(145.02713, 3510.9187)(147.04204, 2638.684)	8.4534
CPD-10329	748378	713361	1541382	1563277	1307786	1302775	1859009	1798657	1268175	1273676	1907142	1965354	2157337	2121182	2016961	2038412	1720984	1686040	2034666	2017382	1929365	1906480	1937191	1939947	2288905	2278970	1134039	1142469	1770295	1771086	CPD-10329	CPD-10329 [ C6 H12 O5, tgt=76.91, overall=76.91 ]			(146.05899, 42423.105)(147.06169, 3301.0803)(169.04799, 9392.978)	4.2966
CPD-12592	134284	124320	127842	131492	120866	124018	110558	190954	128220	154290	208188	203263	120730	108593	108299	103778	331887	335450	266943	262850	221893	224197	267915	263021	352758	346913	306237	299086	211976	218162	CPD-12592	CPD-12592 [ C20 H32 N O3 S, tgt=18.64, overall=18.64 ]			(350.49863, 7901.3438)(351.2097, 1197.6306)(388.2481, 209.53)(389.2043, 2372.51)(373.1789, 24768.17)(374.18204, 2508.6133)	8.2986
CPD-13212	6683871	6407150	4264272	4123055	5099142	4990683	4133351	4214473	3450242	3487455	3831426	3681380	4635592	4601554	3087672	3001519	2219723	2241649	3570802	3742687	3675255	3638126	3510309	3441191	5082773	4906225	5118712	5120647	3293518	3211928	CPD-13212	CPD-13212 [ C22 H28 O13, tgt=77.06, overall=77.06 ]			(483.14246, 192541.17)(484.14487, 34645.816)(485.14572, 5780.151)	9.3194
CPD-13211	170073	153352	254287	233562	198191	186932	289117	255715	275296	267358	200330	190115	399551	314531	271679	272312	289063	292650	203030	178043	145154	147154	200995	194100	182737	128287	169848	1	202882	184195	CPD-13211	CPD-13211 [ C12 H15 N O8, tgt=32.12, overall=32.12 ]			(319.11075, 8429.551)(303.0857, 7757.205)(305.0951, 461.6575)	2.678
CPD-13210	156984	160598	1	90356	124284	123204	187035	186233	261909	267107	239165	225544	158364	1	1	194577	227625	1	271647	268692	303651	310063	251957	1	406916	413249	278788	278964	204955	1	CPD-13210	CPD-13210 [ C11 H13 N O7, tgt=46.52, overall=46.52 ]			(257.07855, 57158.938)(258.08145, 6884.295)(271.0936, 11904.159)(272.09677, 870.09)	16.164
GLYCERATE	97806	98949	144593	148110	116088	128743	176638	159904	199188	201855	1	174776	1	247245	235067	231024	283018	278319	268406	247196	245349	1	1	247791	167043	145919	101786	108636	169577	166082	GLYCERATE	GLYCERATE [ C3 H5 O4, tgt=42.75, overall=42.75 ]			(105.01759, 10682.219)(107.04361, 3561.5747)	10.4137
CPD-13214	473382	449426	256824	165581	339323	104074	1	587915	274263	266182	492421	492820	101793	612430	274151	293252	203309	210881	1	264858	174273	174678	357284	354663	211426	380326	1	460421	479297	435470	CPD-13214	CPD-13214 [ C16 H21 N O11, tgt=30.75, overall=30.75 ]			(389.11584, 351.81003)(427.11572, 457.60147)(388.4059, 3727.4373)(388.1243, 756.91)(425.15314, 39481.305)(426.15717, 5653.593)(405.1121, 3305.9158)(406.131, 249.065)(403.41763, 686.01355)	4.04145
CPD-12594	1271354	947252	1131574	258128	1134791	1092249	1122176	1113199	1395025	1376662	368328	242102	1370474	1343556	1197816	1223097	1439491	1423050	760179	752177	747474	746887	726466	730087	1177014	296560	1312003	1372961	1450673	1450772	CPD-12594	CPD-12594 [ C20 H33 O4 P, tgt=75.96, overall=75.96 ]			(371.2224, 2315.03)(350.2106, 183.04)(371.22305, 3223.7944)(372.22638, 420.23373)(351.20938, 37113.465)(352.21268, 5315.183)(388.25034, 20948.982)(389.2528, 2913.518)(390.2546, 268.40332)(393.90756, 6336.8115)(394.20633, 337.40717)(374.03952, 1958.417)	5.55757
GUANOSINE-5DP-3DP	686988	661332	1	1	1	1	565985	545547	1	1	1	1	771292	757263	1	1	1	1	1	1	592566	598065	1	1	955707	929740	1	1	1	1	GUANOSINE-5DP-3DP	GUANOSINE-5DP-3DP [ C10 H12 N5 O17 P4, tgt=66.70, overall=66.70 ]			(584.9204, 726.065)(584.9217, 1529.4474)(615.9503, 33205.418)(616.9521, 2185.8345)(625.9124, 539.6825)(603.899, 767.85803)	20.2855
NAPHTHOL	834426	773296	1329730	1311935	1011349	1017914	1128265	1138121	1321595	1327264	1640822	1546517	1416230	1534326	1646750	1615338	1326809	1295584	1589765	1649537	1537815	1508482	1632285	1618393	1934566	2000444	1042901	1012231	1506272	1475058	NAPHTHOL	NAPHTHOL [ C10 H8 O, tgt=71.37, overall=71.37 ]			(146.0962, 52038.527)(147.06177, 4225.6113)(130.06343, 6821.7305)(130.06407, 5938.9634)(144.07964, 58883.867)(145.08296, 4977.239)(169.25006, 6914.3813)(170.23154, 16482.21)(171.06195, 1011.9979)	4.2966
CPD-13220	46041248	41660584	40159000	38322644	37287688	36948416	51073396	40723284	40096160	38510688	40733312	40075924	51846200	42296856	42149536	40387964	41884752	40751940	53336820	43592836	39253756	37917160	39824196	38500884	55954720	44212364	41738088	39994140	43126392	42958312	CPD-13220	CPD-13220 [ C5 H10 O, tgt=86.93, overall=86.93 ]			(104.106865, 981825.8)(105.10976, 45469.797)(106.1115, 1066.33)	1.6166
CPD-13223	2362633	2240253	1396521	1372370	1777156	1759713	2275654	2371874	2174748	1	1824512	1782296	1367967	1392511	1697001	1699046	1705558	1690465	1930106	1918598	1810641	1770586	1876619	1851731	2536495	2535891	2846943	2716957	2376094	2381712	CPD-13223	CPD-13223 [ C6 H12 O, tgt=70.83, overall=70.83 ]			(105.069305, 74926.766)(106.07249, 4720.3525)	7.897
CPD-13222	1339368	1285247	2124422	2070599	1235593	1228246	732559	623281	733038	714246	817161	1674059	962127	782459	1262708	1249110	1733787	793441	1450982	1174217	1206995	2029683	1987135	994354	1499383	1247131	858213	825456	1899114	909445	CPD-13222	CPD-13222 [ C6 H10 O, tgt=73.57, overall=73.57 ]			(100.07526, 1694.235)(121.064, 38766.848)(122.06728, 3089.5894)(103.05354, 5565.105)	2.3438
CPD-10571	2055636	2008231	1904714	1936298	1925490	1914824	3199484	3118279	456533	451178	1194405	301386	588037	562724	405504	413600	589534	587437	610031	600687	1419661	1402109	592533	596325	397436	374171	323609	321151	358904	342247	CPD-10571	CPD-10571 [ C21 H26 N, tgt=56.44, overall=56.44 ]			(293.20795, 21276.027)(294.2111, 2122.7922)(295.22256, 1863.636)(296.2259, 235.045)(315.19012, 30205.902)(316.19315, 3567.52)	12.1731
CPD-13225	2267790	2162844	2284481	2195722	2102457	2057708	141594	138699	158260	156173	1	1	1521909	1757084	2052636	2059724	161080	160693	238574	247517	298440	301406	204426	185991	262708	256760	1695937	1700508	2158794	2166647	CPD-13225	CPD-13225 [ C22 H31 N3 O13, tgt=50.17, overall=50.17 ]			(527.17224, 5729.846)(528.17883, 1708.0928)(531.1779, 6560.1836)(532.18097, 1158.653)(533.1935, 271.7425)(563.2042, 66976.664)(564.207, 15954.852)(565.2078, 1967.5587)	12.3173
CPD-13227	107903	6646180	413892	402560	7141010	114670	181879	179813	165458	148952	349312	350841	157556	148334	203207	203213	111751	108373	500790	489176	425611	426416	437086	418474	483837	504026	347694	325208	275697	281598	CPD-13227	CPD-13227 [ C24 H41 N3 O16, tgt=47.17, overall=47.17 ]			(630.7677, 22980.295)(631.47034, 12585.682)(631.27167, 4408.25)(609.24097, 14927.4375)(610.24347, 4313.0938)(631.2708, 9371.02)(633.2751, 239.67)(645.28375, 8482.353)(646.28687, 1743.9261)(631.2702, 8432.82)(633.2755, 215.39)(653.2503, 208.64)(636.2246, 2957.1602)	17.5503
CPD-13226	205960	205092	1934941	1885484	872973	808342	826774	757873	1146875	1116763	332320	661411	175657	375817	1068560	1069454	473621	466732	281161	879288	275822	272544	239947	219338	994880	813428	686035	658114	239361	217023	CPD-13226	CPD-13226 [ C30 H44 N4 O18, tgt=14.20, overall=14.20 ]			(752.3477, 9301.446)(752.2533, 6014.724)(730.27234, 41631.223)(731.2741, 7857.487)(732.27783, 1587.4)(731.26935, 10331.027)(732.2717, 2835.119)(748.27386, 257.72333)(758.64343, 3152.316)	12.4226
DIHYDRO-THYMINE	1	1	1	1	1	1	1	1	1	1	1	1	1	1	1	1	1	1	248078	183904	146092	156789	185210	184227	232304	170110	189563	178122	83411	1	DIHYDRO-THYMINE	DIHYDRO-THYMINE [ C5 H8 N2 O2, tgt= ]			(114.05404, 3989.9636)(116.06961, 3396.2173)(146.09053, 9128.882)(130.08856, 15016.377)(137.04515, 9253.972)	2.031
INDOLE_LACTATE	1706664	1522064	1582074	1570552	1513455	1504184	2167316	1568841	1722873	1596599	1523179	1554830	2440068	1777395	1680443	1545718	1555500	1472157	2334831	1610031	1571380	1576881	1	1528829	2231247	1632102	1552732	1554133	1	1656968	INDOLE_LACTATE	INDOLE_LACTATE [ C11 H10 N O3, tgt=33.10, overall=33.10 ]			(187.06343, 114652.77)(188.0658, 8178.795)(187.06412, 126282.66)(188.0665, 8909.551)(189.0722, 362.075)	1.39641
CPD-10303	734949	1	1425258	1	1258064	867962	1308491	991257	1965136	1922861	1	1381208	1	1806937	1	1	1	1	1	1	1	1	1	1	1558664	1	1	1060121	1200944	1	CPD-10303	CPD-10303 [ C4 H9 N O3, tgt=57.17, overall=57.17 ]			(121.06398, 616.72614)(103.053604, 2844.75)(122.07152, 921.16693)(137.095, 28941.104)(138.09827, 1146.67)(119.08449, 3985.4285)(146.05879, 800.07996)	7.41775
QUINATE	250592	238851	232385	238168	236714	221786	173890	187223	1	264404	207884	1	1	1	223335	211597	204747	211699	247650	228986	180861	174620	229859	217459	243792	217592	210667	214713	224222	225470	QUINATE	QUINATE [ C7 H11 O6, tgt=45.39, overall=45.39 ]			(191.05157, 9695.847)(177.0559, 2040.8434)(196.24274, 1940.7152)(177.06213, 7471.601)(193.08418, 300.86667)(197.0429, 2331.17)	4.6532
CPD-1002	563039	674393	676842	1	667656	656591	1895460	1947723	1971251	2536583	1956726	1	847782	530893	662858	679876	1	571930	1906947	1899341	1600143	921725	2023341	2004538	553539	1	1	1	683851	677154	CPD-1002	CPD-1002 [ C10 H14 O, tgt=68.22, overall=68.22 ]			(151.11, 1711.5492)(133.10011, 28018.438)(134.1034, 1225.9591)(155.1416, 2105.8738)	6.6504
CPD0-1141	661118	619932	1	594227	597277	585186	817427	727080	650364	645025	327355	584407	826933	384826	526631	590669	538760	530571	564907	456935	408625	404207	190311	289880	775379	691644	723108	710006	558158	526421	CPD0-1141	CPD0-1141 [ C16 H21 N5 O6, tgt=41.02, overall=41.02 ]			(382.16672, 2495.8665)(362.1378, 396.032)(382.1676, 2101.2744)(382.1685, 2121.77)(403.37473, 1260.4318)(404.29218, 2264.5266)(405.1465, 3572.837)(386.1403, 1530.04)	3.00531
QUINOLINATE	174369	175169	1	1	97215	110705	197615	124927	1	125993	1	109743	210202	164578	127925	110240	124467	1	179483	117703	131143	134431	116424	106453	191312	161308	103098	129208	111714	1	QUINOLINATE	QUINOLINATE [ C7 H3 N O4, tgt=47.04, overall=47.04 ]			(167.01112, 2401.572)(168.0102, 393.99)(146.99335, 2160.5623)(184.0483, 659.88007)(165.03175, 516.1982)(187.99092, 1468.1244)	1.42939
2-HYDROXYDAIDZEIN	1024982	1000999	1111695	1089398	1044649	1051841	708237	737664	599252	605047	1010986	1027674	803361	813862	937910	951414	795750	803177	659482	647401	800348	773400	545324	533707	765657	795688	539871	506454	1088872	1094587	2-HYDROXYDAIDZEIN	2-HYDROXYDAIDZEIN [ C15 H10 O5, tgt=68.30, overall=68.30 ]			(271.05765, 42230.95)(272.06058, 4648.317)(295.0494, 77533.125)(296.05362, 9707.385)	7.528
CPD-20039	770036	734624	1337462	1350791	1055247	1034776	1	621802	1024905	1023995	582090	1121886	831794	827249	539312	552719	178587	1	692906	383035	497409	477766	1	303329	674513	665072	191298	188611	172971	458380	CPD-20039	CPD-20039 [ C16 H14 O7, tgt=54.80, overall=54.80 ]			(318.5149, 2699.9155)(301.06674, 5383.887)(302.07642, 5693.12)(320.60376, 3204.1426)(341.06192, 19911.463)(342.06506, 1509.5201)(323.05087, 7750.386)(324.0541, 572.27423)	6.55327
CPD-10502	231439	211296	170792	180300	195270	174096	262386	265260	222756	216089	298954	305684	255494	264796	244128	255570	320954	331779	312368	279116	284618	286446	295390	270532	297819	264880	311909	272792	348718	340340	CPD-10502	CPD-10502 [ C28 H33 O16, tgt=52.01, overall=52.01 ]			(629.1771, 735.8075)(628.20715, 1212.395)(629.1756, 217.97)(610.1947, 1400.0626)(644.2106, 13749.819)(645.21387, 3271.751)(628.20874, 1509.8237)(649.1653, 1615.3689)	8.2656
CPD0-1152	1	1	1	1	1	1	1	1	1	1	1	1	1	1	1	1	1	1	1	1	1	1	1	1	995734	963130	875680	875681	482074	1	CPD0-1152	CPD0-1152 [ C14 H28 N2 O4, tgt= ]			(270.18997, 26636.443)(271.19254, 1617.7561)	3.395
CPD-10507	152928	148286	150878	155428	143594	142492	164799	155012	183304	180847	121255	110851	99138	103295	375536	218523	351529	343359	212256	209859	297389	291344	186499	173562	182029	166032	162954	162044	140179	145116	CPD-10507	CPD-10507 [ C12 H12 N O2, tgt=43.64, overall=43.64 ]			(206.76503, 1751.4984)(225.07375, 3165.7847)(207.06487, 9023.022)	5.0174
DEOXYGUANOSINE	18782126	17736636	13436422	13258872	15174382	15058394	21549572	17564192	13768807	13642515	12413609	12209913	20400616	17296692	14162265	13970198	16913260	16809954	16862684	14017733	13979382	13965082	13106692	12817416	18744888	15596936	13599961	13315769	14129700	14125941	DEOXYGUANOSINE	DEOXYGUANOSINE [ C10 H13 N5 O4, tgt=86.57, overall=86.57 ]			(267.095, 15531.641)(268.10245, 548560.94)(269.10446, 57247.824)(270.10583, 5292.872)(286.13605, 327.4943)(291.081, 20842.012)(292.08395, 779.0458)	2.1112
CPD-591	916502	841872	1168988	1124485	982361	981593	990144	862925	1146336	1230547	1	879379	946025	833216	974545	982917	930009	936056	899536	798565	1	1	919085	879915	857156	730461	963285	920441	928122	901336	CPD-591	CPD-591 [ C15 H9 O6, tgt=14.19, overall=14.19 ]			(289.0636, 3049.1233)(303.08133, 19607.455)(304.08307, 639.4068)(305.07465, 1429.415)(289.06543, 3898.93)(291.9269, 2230.1655)(292.01874, 688.51)	2.09107
CPD-590	972178	922152	1760242	1745261	1353361	1301931	213033	1	1	1	268705	1	601050	1	1012843	1010392	543910	541798	233023	238847	1	1	188206	193009	553314	1	1	1	418842	410448	CPD-590	CPD-590 [ C15 H14 O7, tgt=50.97, overall=50.97 ]			(289.0676, 26934.309)(290.0712, 2748.2803)(324.10428, 1973.3733)(308.0869, 4321.0747)	4.684
CPD-10510	37694676	36923940	35189084	34845144	35253428	35104672	30158942	29553420	30350100	29882952	36143432	36247292	32298576	31864508	32059128	31838012	31855546	31542936	27100996	26494452	27380542	26708800	24803048	24960996	30984630	30214738	27920592	27731912	32786908	32370890	CPD-10510	CPD-10510 [ C18 H16 O7, tgt=76.66, overall=76.66 ]			(345.09433, 1028710.6)(346.09744, 181559.3)(347.09912, 23705.725)(348.101, 1022.4571)(365.6016, 817.1944)(367.07538, 132250.84)(368.9967, 4024.6887)(369.08105, 2693.755)	13.9696
ACETYLSERINE	26310232	25669606	15390905	15116260	20672542	20584324	27935104	27159744	24269136	24004056	20463160	20957312	14315580	14062570	18843132	18403516	19674154	19331560	22231496	21310304	20337750	20307500	1	20911588	29553796	28119576	32424674	31498914	28178104	28188998	ACETYLSERINE	ACETYLSERINE [ C5 H9 N O4, tgt=63.87, overall=63.87 ]			(131.04802, 1040.3058)(150.06615, 2104.7815)(165.09038, 1051344.5)(166.09332, 95859.33)(167.09543, 6273.0264)	7.8978
CPD-20040	423349	957973	1209329	1199279	1046539	1032812	1093562	960935	1248023	1247354	452473	928908	1072354	920644	974545	998151	941002	944766	330581	324074	360207	358702	290186	903101	419959	399788	1028516	1004489	813271	914382	CPD-20040	CPD-20040 [ C16 H14 O6, tgt=66.17, overall=66.17 ]			(303.08185, 18435.879)(304.08313, 584.478)(305.09076, 2764.439)(285.07233, 16178.571)(286.0756, 911.31445)(286.0872, 191.45)(325.1344, 9655.91)(330.0904, 28287.71)	5.8432
CPD-597	1023657	981608	1186676	1196969	1058787	1039248	1083848	1172606	1584917	1533495	1135336	1150902	1317924	1435940	1096631	1116059	872114	884879	2566068	1170203	1967190	927657	1970685	2460532	1273627	1338005	1387635	1312306	947210	920968	CPD-597	CPD-597 [ C5 H14 N3 O, tgt=59.83, overall=59.83 ]			(135.78429, 4159.3765)(137.12997, 1488.385)(151.14624, 1243.28)(159.114, 194.71)(137.0949, 37647.332)(138.1705, 1115.07)	7.748
CPD-10518	635336	567585	643323	713661	635435	582749	544710	342149	223584	231362	224005	220124	301917	154681	304390	290278	1	1	242653	1	1	1	1	1	427636	222259	1	1	298975	311766	CPD-10518	CPD-10518 [ C33 H45 N8 O18 P3 S, tgt=16.29, overall=16.29 ]			(966.1823, 8701.701)(967.18506, 2577.9785)(971.137, 556.166)	7.36872
CPD-10511	1	1	1	1	1	1	1	1	124169	117189	1	1	162311	140500	114826	126997	161115	155141	132840	133235	106408	100831	157871	151152	93827	1	1	1	1	79970	CPD-10511	CPD-10511 [ C16 H28 O4, tgt= ]			(307.18643, 3282.97)(289.17642, 5631.8213)	13.7212
CPD-10512	1	1	1	1	1	1	1	1	1	1	1	1	145523	135057	1	1	161045	157885	153803	149880	147285	149830	185480	184766	143690	133160	1	1	1	1	CPD-10512	CPD-10512 [ C16 H29 O3, tgt= ]			(291.264, 852.57)(273.254, 4007.6348)(274.25696, 1133.69)(292.19522, 7308.2017)(293.20676, 918.1767)(275.19705, 2141.5442)	12.7074
CPD-10520	3021283	2870692	3023152	2976857	2883485	2887730	2162501	2104078	994336	2079175	1415382	2641213	2288729	2182461	2504734	1	2244092	2242575	1329529	1114120	1163225	1155734	647559	960918	2117164	1978199	1904724	1870025	2369300	2327362	CPD-10520	CPD-10520 [ C18 H16 O8, tgt=65.59, overall=65.59 ]			(361.08646, 9915.58)(362.21597, 631.85876)(345.091, 655.27)(361.0887, 102744.68)(362.09125, 15921.548)(363.09344, 1094.4678)(343.07718, 16158.063)(344.08, 2168.1042)(378.11346, 4062.0613)(379.1215, 740.19)(364.2786, 626.3933)(383.069, 4861.0264)	10.8079
CPD-13254	33854528	782600	2999421	964653	319325	312779	1033197	1	21668512	21295902	20411214	20332214	29096840	947332	22440620	20597164	17259684	17636404	23548084	1082384	1026625	24096868	18854512	18616870	29646588	879166	649488	658934	16117715	15690417	CPD-13254	CPD-13254 [ C42 H67 O14, tgt=51.70, overall=51.70 ]			(799.48645, 912.00995)(800.4901, 243.175)(779.44574, 17472.47)(780.44934, 5953.6924)(813.49915, 209612.12)(814.5014, 94076.63)(815.50653, 28332.379)(816.51263, 5336.791)(817.5081, 300.29352)(799.4886, 6187.58)(800.4926, 2057.21)	20.2819
CPD-13255	5159035	5230816	1762702	1773358	5469124	6552595	5844741	5978814	3029226	1320954	2446718	2389779	4653543	4767853	2565601	2414554	2734347	2791831	4208333	1827536	5884597	5254376	1508351	1366450	5412132	5703054	1928367	1859190	2501216	2306503	CPD-13255	CPD-13255 [ C48 H77 O18, tgt=49.63, overall=49.63 ]			(923.5205, 38489.89)(924.52313, 21406.268)(925.52515, 5268.5874)(959.5608, 67505.2)(960.56335, 33397.92)(961.5682, 13509.174)(962.5773, 2250.3147)(963.5797, 328.77637)(941.5372, 12829.81)(942.53754, 2441.96)	24.5424
CPD-20030	563039	674393	676842	1	667656	656591	1895460	1947723	1971251	2536583	1956726	1	847782	530893	662858	679876	1	571930	1906947	1899341	1600143	921725	2023341	2004538	553539	1	1	1	683851	677154	CPD-20030	CPD-20030 [ C10 H14 O, tgt=68.22, overall=68.22 ]			(151.11, 1711.5492)(133.10011, 28018.438)(134.1034, 1225.9591)(155.1416, 2105.8738)	6.6504
CPD-7289	2622452	2485521	2970616	1784662	2618967	2567868	1903515	1540648	3005026	2966679	1184974	1184447	1422672	1239367	1389620	2723591	1552549	3113996	2612859	2153013	1407733	1423878	2304612	2261984	2097061	1729115	2375326	1413406	1420391	1370170	CPD-7289	CPD-7289 [ C12 H18 N2 O9, tgt=91.24, overall=91.24 ]			(358.0866, 217.03)(317.09634, 11847.139)(318.10043, 158.74666)(335.0555, 3687.5938)(356.14896, 60.373333)(335.1065, 3825.81)(339.08066, 29644.322)(340.0842, 3228.585)(341.08014, 1249.3778)	2.8752
CPD-13251	1201900	1126130	279349	1	1	1	1295784	1248331	154397	139163	1	1	1117102	1084844	1	1	85608	87643	163114	148213	1097157	1111961	108078	95304	1245581	1207425	1	1	1	1	CPD-13251	CPD-13251 [ C30 H50 O4, tgt=60.09, overall=60.09 ]			(456.3625, 22512.094)(457.36496, 5001.4673)(457.36047, 5490.34)(479.34213, 2541.3325)	18.763
CPD0-1138	416129	398629	425535	418336	403936	400782	129525	100211	294105	291863	902006	366656	164575	305843	353808	359389	310891	311667	115874	239040	247632	953154	760630	1	138284	116118	1	1	332076	333056	CPD0-1138	CPD0-1138 [ C11 H13 N4 O7 P, tgt=48.25, overall=48.25 ]			(362.09103, 17422.934)(363.0932, 1186.2328)(349.08423, 4063.258)(367.05222, 27906.123)(368.05505, 3727.7334)(369.05164, 271.44)(349.02164, 5808.172)	9.97093
ADENOSYL-HOMO-CYS	277903	1	118380	1	161771	259111	235724	230143	172297	182512	155848	203578	196714	199482	191239	213474	244887	242516	191421	189493	234735	226985	232832	167169	257153	243844	158172	1	153953	162893	ADENOSYL-HOMO-CYS	ADENOSYL-HOMO-CYS [ C14 H20 N6 O5 S, tgt=9.37, overall=9.37 ]			(387.68796, 9704.967)(390.1227, 1267.23)(366.1128, 9085.47)(367.1098, 2449.644)(390.63028, 4145.9927)(405.146, 3742.42)(387.15082, 4621.535)	13.9881
CPD-20015	1849264	105373	2422017	2418981	119669	2040925	1555358	1427724	82838	255966	184022	1998026	134434	137210	133235	133060	123785	122322	1513099	106490	1740268	1706526	145553	1067971	1394503	1282125	883639	831137	147521	1702103	CPD-20015	CPD-20015 [ C21 H21 O11, tgt=57.17, overall=57.17 ]			(449.10272, 42914.9)(450.10583, 12092.171)(451.10843, 1142.9338)(455.1257, 1196.4922)(433.53888, 55981.812)(434.57562, 9481.795)(437.12387, 5082.0063)(469.15994, 1188.37)(449.13428, 11499.086)(450.138, 1404.6649)	7.18523
NUKED-PENTOSE-RING	112055	101978	177604	403720	134550	99554	628719	551531	103509	103526	559063	487056	648700	578753	686088	108362	580284	605884	574708	516199	222984	213562	231292	469060	433112	365018	358945	355116	410448	400143	NUKED-PENTOSE-RING	NUKED-PENTOSE-RING [ C5 H10 O4, tgt=46.36, overall=46.36 ]			(136.06114, 17315.287)(120.66311, 4741.0566)(139.03786, 14473.122)(140.0443, 3055.545)	3.94587
MANNOSE-1P	2270644	2197389	2489583	2482148	2299798	2315769	2675792	2163249	2550897	274482	241977	238837	264521	227741	194569	2640753	2286066	2280429	226985	2553692	2508255	2465683	206940	2423973	2731938	2407466	2629768	2537361	2158163	2563059	MANNOSE-1P	MANNOSE-1P [ C6 H11 O9 P, tgt=20.52, overall=20.52 ]			(259.01038, 733.16364)(241.00319, 188052.94)(242.00398, 52828.934)(259.02713, 13188.954)(260.0289, 743.62)(261.02554, 785.765)(241.00381, 201970.7)(242.00467, 56867.902)	1.4018
CPD-10527	5710502	5454737	1	1	5173087	5196897	4508313	4458516	4816600	4748266	5670721	5550438	4994881	4868475	5118735	5080163	1	4954749	4432800	4399249	4460633	4376548	4181853	4169775	4692040	4610853	4234294	4200077	5097072	4938663	CPD-10527	CPD-10527 [ C17 H14 O8, tgt=51.55, overall=51.55 ]			(346.09738, 190110.08)(347.09903, 24740.252)(348.10095, 1018.44855)	13.9672
CPD-10529	513348	498272	545452	552985	505825	514719	488864	492806	523098	506488	700673	703782	580258	564284	581019	595252	593483	591235	680225	667657	715808	690784	592740	603672	663228	629143	546406	550723	696196	688567	CPD-10529	CPD-10529 [ C19 H18 O8, tgt=38.65, overall=38.65 ]			(375.10315, 25665.81)(376.1061, 3374.4219)(397.15665, 1335.301)(397.08438, 2514.4558)	13.824
CPD-10523	116244	93326	110709	107705	100051	95060	154727	110082	110754	98745	111227	109606	185194	121562	110993	90036	110182	98670	165878	108552	97008	99528	101844	105635	157674	104880	95397	102570	115274	123273	CPD-10523	CPD-10523 [ C8 H9 N O2, tgt=42.94, overall=42.94 ]			(139.0725, 1617.8267)(174.0555, 4541.2207)(156.04385, 4305.325)	1.394
R-VICIANIN	434319	433208	402738	406820	397512	377582	498623	418885	492985	479040	1	399633	538249	445826	386977	403128	365937	1	518010	436871	392813	393060	1	458601	578747	506002	524345	510459	418690	417862	R-VICIANIN	R-VICIANIN [ C19 H25 N O10, tgt=54.37, overall=54.37 ]			(431.14783, 819.51227)(413.13657, 5871.1797)(429.16998, 1227.8256)(427.1687, 21401.33)(428.1716, 2841.6533)(429.16928, 468.64502)	3.9628
CPD-20023	170440	162014	216373	1	5326181	223437	5839027	5394877	2962558	2734484	309225	2168698	273049	267043	278982	272494	242105	234348	355440	313660	334377	5341562	2738292	253469	394756	351840	219632	2949409	265065	2185445	CPD-20023	CPD-20023 [ C27 H31 O16, tgt=64.03, overall=64.03 ]			(595.1584, 17188.336)(596.1612, 3588.8125)(612.17487, 18923.732)(613.1742, 5412.2773)(614.1725, 930.25507)(611.177, 26583.719)	12.2796
CPD-7279	1	1	1	1	1	1	1	1	1	1	1	1	1	1	1	1	1	1	150577	132752	109800	115530	1	1	169110	146814	1	1	1	1	CPD-7279	CPD-7279 [ C15 H22 O3, tgt= ]			(233.1477, 7619.7)(256.17242, 426.965)(233.1469, 7098.6436)(270.1891, 4943.717)	3.12007
GLC-6-P	2270644	2197389	2489583	2482148	2299798	2315769	2675792	2163249	2550897	274482	241977	238837	264521	227741	194569	2640753	2286066	2280429	226985	2553692	2508255	2465683	206940	2423973	2731938	2407466	2629768	2537361	2158163	2563059	GLC-6-P	GLC-6-P [ C6 H11 O9 P, tgt=20.52, overall=20.52 ]			(259.01038, 733.16364)(241.00319, 188052.94)(242.00398, 52828.934)(259.02713, 13188.954)(260.0289, 743.62)(261.02554, 785.765)(241.00381, 201970.7)(242.00467, 56867.902)	1.4018
CPD-7260	511238	488018	592348	597309	531869	520174	1032213	1086022	757746	755961	834634	833775	1057344	1102660	947311	940204	1295002	1307279	1204337	1245963	1152853	1124648	1251328	1218554	621722	633414	519684	511850	1053715	1040284	CPD-7260	CPD-7260 [ C21 H19 O11, tgt=44.93, overall=44.93 ]			(448.6918, 4370.059)(452.0968, 911.22675)(451.1002, 8992.669)(452.0975, 290.67)(465.13144, 46315.074)(466.13412, 7672.8296)(467.13535, 651.79645)	8.8664
CPD-536	129261	106613	1	1	84623	83331	123784	93502	1	1	1	1	166437	118894	1	1	1	1	107231	1	81853	86282	1	1	116651	108648	1	1	1	1	CPD-536	CPD-536 [ C3 H7 O6 P, tgt=37.05, overall=37.05 ]			(175.01715, 8527.491)(189.19092, 5728.0513)(189.04175, 814.6013)(175.03543, 10113.277)	1.4026
2-OXOBUTANOATE	100583	92272	99524	97021	1	1	125769	95098	97939	99284	88989	80672	124022	81511	99839	94144	90250	86920	120298	83468	99043	93736	94600	86742	118697	100578	85126	91280	91419	95999	2-OXOBUTANOATE	2-OXOBUTANOATE [ C4 H5 O3, tgt=47.27, overall=47.27 ]			(101.02617, 7259.542)(107.04325, 20844.396)(105.05434, 1327.635)(127.023735, 964030.94)(128.02504, 157351.52)(129.02174, 130850.17)	1.3972
3-4-DIHYDROXYBENZOATE	109399	1	75918	73196	78457	80312	133641	1	80416	1	1	1	1	100805	78664	1	1	1	146670	83907	74889	86348	1	76081	148885	100782	1	1	1	1	3-4-DIHYDROXYBENZOATE	3-4-DIHYDROXYBENZOATE [ C7 H5 O4, tgt=6.64, overall=6.64 ]			(135.0116, 416.15)(157.03651, 1367.9667)(171.04887, 4799.492)(153.03827, 1098.5208)	1.39259
CPD-7268	1048322	989986	1675595	1668817	1287264	1327949	1445625	1470030	1698986	1700785	2070380	1948808	1805366	1929533	2071708	2041016	1672419	1639525	2011724	2068712	1902678	1882045	2036666	2012475	2374132	2521053	1304142	1295817	1901187	1879130	CPD-7268	CPD-7268 [ C8 H9 N O, tgt=81.06, overall=81.06 ]			(136.06966, 751.79004)(117.05715, 8843.108)(118.06437, 63691.55)(119.06767, 5160.8755)(163.07195, 6135.1855)(140.04568, 542.3041)	4.2966
CPD-20014	170801	162292	1	1	1	1	1	1	1	1	1	1	1	1	1	1	1	1	1	1	1	1	1	1	132434	1	1	1	1	188078	CPD-20014	CPD-20014 [ C27 H29 O15, tgt=64.03, overall=64.03 ]			(595.1585, 10962.45)(596.16156, 2010.1324)(581.14246, 538.70996)	7.38815
CPD-20011	162744	157476	505554	479521	1	1	1	1	1	1	1	1	730194	626241	579009	579061	766915	852537	721768	596413	674335	676078	634375	606855	389660	1	1	1	369177	373142	CPD-20011	CPD-20011 [ C27 H34 O15, tgt=16.79, overall=16.79 ]			(598.71716, 15716.372)(599.1915, 2468.3088)(603.1977, 364.24)	12.3927
CPD-20010	3406266	3368043	3671152	3598375	3396899	3390092	4127314	4363616	3420671	3385928	3477211	3497738	3666655	4015288	4382884	4380145	5104083	4926672	107951	4243386	105230	110753	3799070	3754099	3775520	4084760	3647550	3602069	4335728	4271987	CPD-20010	CPD-20010 [ C21 H24 O10, tgt=34.54, overall=34.54 ]			(436.47263, 62648.586)(437.1256, 11982.098)(438.1262, 168.24)(441.69275, 2357.7615)(440.89975, 1850.59)(441.16568, 8627.563)(442.16953, 846.0633)(420.14474, 5829.607)(455.58258, 4890.1704)(459.63162, 764.99725)(460.17538, 401.36337)(464.78268, 1491.057)	8.7258
N-HYDROXYL-TRYPTAMINE	311689	291946	512013	529408	407875	407031	473857	472576	533245	531524	614416	620882	604970	592023	646250	649228	548640	524835	668120	655094	603558	599008	635205	633548	839534	821408	408775	408465	599306	607637	N-HYDROXYL-TRYPTAMINE	N-HYDROXYL-TRYPTAMINE [ C10 H12 N2 O, tgt=37.21, overall=37.21 ]			(179.10501, 377.3228)(159.09038, 25094.344)(160.09169, 1697.201)(182.07936, 6316.873)	4.2966
CPD-14765	740708	679365	518219	859542	561215	558474	786953	766106	779026	754518	877279	850955	652237	619720	513723	512422	709390	710402	1791891	1802913	1640856	1646979	1850382	1742697	777035	738453	723779	740154	996825	991539	CPD-14765	CPD-14765 [ C27 H41 O7, tgt=71.74, overall=71.74 ]			(478.28677, 20684.623)(479.2905, 4942.8066)(460.28757, 2466.2844)	15.585
CPD-14769	2548078	2409342	252331	243784	2273111	2230237	2312225	2062383	1267720	1255015	1	1	607033	565204	1632131	1625034	1625852	1593532	1309795	1220139	1093304	1088286	579405	560170	734801	640349	1831346	1821119	1	1	CPD-14769	CPD-14769 [ C20 H23 O2, tgt=24.08, overall=24.08 ]			(295.1701, 13454.475)(296.17325, 934.58496)(300.19727, 16914.285)(301.20007, 1550.165)(318.15158, 54526.89)(319.15085, 7396.099)(305.1637, 5141.705)	4.06577
ISOVITEXIN-2-O-B-D-GLUCOSIDE	170801	162292	572514	418887	253482	256309	1	226592	245321	244279	346913	322330	1052078	837884	180051	287208	265856	253758	328301	352538	1	372381	297904	290823	132434	370135	246730	243027	301563	188078	ISOVITEXIN-2-O-B-D-GLUCOSIDE	ISOVITEXIN-2-O-B-D-GLUCOSIDE [ C27 H29 O15, tgt=64.03, overall=64.03 ]			(594.8706, 12350.782)(595.8735, 2548.1062)(577.824, 944.51825)(577.14886, 8952.585)(578.1521, 1417.935)(599.12976, 2950.92)	6.66514
CPD-7252	585786	562108	711962	719908	627598	610163	978049	849634	802978	1073939	772831	790209	1069259	913304	1121582	1116685	907286	902048	647786	1	3078909	3050255	2319081	1	613729	608218	620674	632716	794228	807649	CPD-7252	CPD-7252 [ C16 H11 O6, tgt=6.14, overall=6.14 ]			(304.08215, 142.4)(317.09656, 14295.443)(318.10046, 435.43088)(302.6914, 13113.12)(300.42435, 8994.45)(301.0927, 384.57)(322.0515, 1037.3334)(307.0403, 848.9116)	4.00093
CPD-14770	13619648	13075737	14759022	14665583	13437583	13517146	14771312	13463261	17496384	17318688	13118304	13201010	16188842	15051586	13351841	13189773	11638432	11543330	12738833	11693790	9292516	9245621	12809836	12568688	14680992	13285270	14381969	14287901	11968520	11908547	CPD-14770	CPD-14770 [ C11 H17 N3 O, tgt=86.78, overall=86.78 ]			(207.13693, 445174.34)(208.1397, 51576.0)(189.12582, 47466.098)(190.12871, 4868.2354)(191.1397, 9297.87)	5.0158
COPROPORPHYRIN_III	378987	354907	335939	340012	335047	329029	470701	384971	353710	345846	340695	348989	449853	388527	382372	380616	367811	372805	451647	363020	349702	356170	320025	326613	468546	377380	336728	322997	424388	427442	COPROPORPHYRIN_III	COPROPORPHYRIN_III [ C36 H34 N4 O8, tgt=57.67, overall=57.67 ]			(637.2249, 5755.6157)(638.2289, 470.88403)(652.2373, 23397.96)(653.2398, 5492.25)(654.2521, 21097.76)(655.2542, 5031.49)(659.2802, 39811.113)(660.2113, 9994.145)	6.4108
CPD-14737	1555112	2031116	1930324	1432588	1459051	2142645	6221019	2291369	1869031	2818600	3413983	3290807	3081571	3058359	2070214	2281982	2061145	2248394	2515054	2376105	1998683	2001379	2542939	2430858	2915393	2800017	6584315	6432799	2219888	2221332	CPD-14737	CPD-14737 [ C21 H30 O11, tgt=71.70, overall=71.70 ]			(460.9919, 1646.8691)(440.96646, 42878.3)(442.17453, 8813.233)(443.1734, 2088.394)(441.16833, 18526.318)(442.17447, 2898.2095)(476.20865, 2002.8724)(477.2106, 316.88)(458.20468, 23332.883)(459.1984, 5184.6123)(481.1646, 796.12244)	7.94783
CPD-14735	601499	579767	1329152	1267037	1043197	600152	1	1536085	298256	295763	1746901	314566	1792084	452143	1545859	1577915	423278	422989	861774	1	1	2327029	422345	1	358396	510895	792107	723039	559249	548824	CPD-14735	CPD-14735 [ C19 H28 O10, tgt=37.62, overall=37.62 ]			(419.50586, 4838.8667)(399.15573, 17914.65)(400.15808, 2278.301)(399.15872, 6092.75)(434.95166, 4357.049)(439.65674, 37601.066)(440.3922, 5963.2925)(441.15274, 3848.8472)(424.40445, 524.905)	5.57624
CPD-14739	1559592	1507631	1589848	1638968	1572049	1589021	2566735	1779210	1983040	1964762	1484425	1454929	2492275	1761702	1548896	1536427	1533221	1531001	2257180	1539343	1211923	1221911	1750571	1731589	2368329	1694488	1944493	1933023	1592437	1572550	CPD-14739	CPD-14739 [ C18 H26 O10, tgt=51.76, overall=51.76 ]			(404.15048, 84025.62)(405.15244, 14336.29)(406.15598, 2490.824)(387.1528, 337.06436)(404.15176, 98504.57)(405.25937, 15234.411)(406.15765, 3059.9414)(407.83774, 302.33667)(387.1567, 337.315)(425.15268, 58932.926)(426.15625, 9285.803)(407.13354, 1103.9122)	5.0258
TRIFLUOROMETHIONINE	118143	100314	106232	100939	103416	108999	126671	1	100199	106954	1	1	132484	1	148497	154313	131849	137290	203308	158291	153451	139731	119980	112670	226297	166432	127248	114140	1	1	TRIFLUOROMETHIONINE	TRIFLUOROMETHIONINE [ C5 H8 F3 N O2 S, tgt=46.79, overall=46.79 ]			(222.05865, 2446.1033)(226.00903, 7820.554)(227.0142, 290.51)	2.06
CPD-556	845710	1202925	883668	862082	834897	945073	837879	936111	434850	424139	1847765	5804026	1797867	2569581	496124	518165	2948895	3265628	827694	938274	671518	887031	540160	534767	2534020	2908854	1408796	1356081	2139501	3404398	CPD-556	CPD-556 [ C33 H56 O6, tgt=67.22, overall=67.22 ]			(551.5622, 2270.5767)(550.4132, 1364.075)(552.1725, 648.6825)(531.4008, 25440.5)(532.40356, 6260.186)(533.4028, 1137.11)(571.4641, 2247.725)(572.4682, 1452.636)(553.3821, 3453.3965)(554.3858, 888.55005)	23.615
QUININE	1214266	1276770	1234061	1228455	1235251	1229412	1219645	1132856	1266138	1232872	1	1345612	1419259	1276903	1295650	1360745	1368343	1355349	1207847	382753	733670	1	1	1	1419087	1348475	1361505	1347155	1376861	1377198	QUININE	QUININE [ C20 H25 N2 O2, tgt=63.88, overall=63.88 ]			(349.1774, 7863.3516)(352.84467, 19920.314)(353.19217, 24788.422)(344.22467, 59175.81)(345.22733, 7139.434)(346.22934, 1178.2633)(327.19806, 27889.924)(328.2009, 3083.6829)(328.21835, 480.68002)	3.99852
ISOVITEXIN	1	1	1	1	1	1	157049	161230	257217	250712	188497	171977	102124	175027	225471	237807	258437	274324	145716	148955	1	1	146065	143619	193036	215319	1	1	1	1	ISOVITEXIN	ISOVITEXIN [ C21 H19 O10, tgt= ]			(437.1246, 11444.1)(435.12207, 274621.34)(436.12448, 46037.688)(437.12534, 7430.769)(449.13556, 11063.511)(450.1392, 1389.6365)(432.86566, 73485.83)(435.37143, 283742.1)(436.12354, 61323.28)	9.5312
CPD-7246	375726	355353	416197	415986	391166	386317	307000	329139	266999	272426	425010	417563	393554	406792	368179	365927	282780	290573	251592	242698	290032	279274	218386	1	205312	207653	155071	151965	389310	384753	CPD-7246	CPD-7246 [ C8 H14 N O9 P, tgt=42.45, overall=42.45 ]			(287.05203, 20637.611)(303.047, 1083.8368)(301.0675, 7182.93)	7.6194
CPD-4889	3104482	3010030	1	1	1	3464831	1	1	1	1	1	1	1	6424887	6275969	6266645	6989378	7155188	1	1	1	1	1	1	4276718	4127714	3065020	3037253	4780834	4716770	CPD-4889	CPD-4889 [ C10 H16, tgt=80.60, overall=80.60 ]			(137.13193, 211418.33)(138.1348, 17968.33)(154.15779, 19807.553)(155.16086, 1139.7963)(159.11513, 257.82)	10.4172
HOMOARGININE	1197795	1082875	1499115	1513234	1375648	1133787	1123768	1107681	1775613	1720611	1	1357607	1452758	1453589	1354034	1098288	974852	1186189	881698	1101419	642281	656163	1	376801	1127796	1098704	1239287	1215059	1011683	997517	HOMOARGININE	HOMOARGININE [ C7 H17 N4 O2, tgt=40.71, overall=40.71 ]			(173.13077, 3362.7222)(191.14064, 10162.069)(197.11552, 1596.2107)	5.0158
6-HYDROXYMELLEIN	1077559	1072341	1374280	1353175	1180655	1171758	687141	1	1	1	1	1	1594199	1583541	1	1139829	1588870	1606973	1	1	812507	1	719587	694264	704819	705118	1176794	616980	986246	972565	6-HYDROXYMELLEIN	6-HYDROXYMELLEIN [ C10 H10 O4, tgt=69.97, overall=69.97 ]			(177.05432, 17338.336)(178.0565, 457.58197)(215.10477, 3025.7805)(216.10802, 248.60501)(197.0947, 196.66)(201.0415, 687.775)	9.14046
CPD-4888	3104482	3010030	1	1	1	3464831	1	1	1	1	1	1	1	6424887	6275969	6266645	6989378	7155188	1	1	1	1	1	1	4276718	4127714	3065020	3037253	4780834	4716770	CPD-4888	CPD-4888 [ C10 H16, tgt=80.60, overall=80.60 ]			(137.13193, 211418.33)(138.1348, 17968.33)(154.15779, 19807.553)(155.16086, 1139.7963)(159.11513, 257.82)	10.417
CPD-560	15013127	14248287	23840376	23755846	19825568	19596352	14409300	13111079	17471964	17452246	4605093	19498580	15980672	14491921	19577544	19449344	13604757	13351097	17788706	16411365	17114046	3903002	3314283	3196256	13480372	12354045	8529330	8455523	17021776	16982546	CPD-560	CPD-560 [ C6 H12 O4 S, tgt=49.85, overall=49.85 ]			(163.03717, 93176.4)(163.03836, 501041.4)(164.04112, 40283.68)(165.04327, 2540.7192)(181.04817, 9903.517)(180.07254, 653.9727)	8.309
CPD-4886	3104482	3010030	1	1	1	3464831	1	1	1	1	1	1	1	6424887	6275969	6266645	6989378	7155188	1	1	1	1	1	1	4276718	4127714	3065020	3037253	4780834	4716770	CPD-4886	CPD-4886 [ C10 H16, tgt=80.60, overall=80.60 ]			(137.13193, 211418.33)(138.1348, 17968.33)(154.15779, 19807.553)(155.16086, 1139.7963)(159.11513, 257.82)	10.417
NICOTINAMIDE_NUCLEOTIDE	6188998	5997628	6283553	6247706	6117864	6132330	6273594	6318633	6484057	6480451	6686020	6578275	6168380	6235905	6467743	6451203	6070459	6108317	5846739	5915314	6728252	6803854	5241399	5160256	6197883	6307416	5047237	4912733	6060145	5982960	NICOTINAMIDE_NUCLEOTIDE	NICOTINAMIDE_NUCLEOTIDE [ C11 H14 N2 O8 P, tgt=84.39, overall=84.39 ]			(351.08084, 171655.44)(352.0834, 26808.354)(353.0854, 2470.4104)	15.6844
CPD-14740	889529	860994	350545	358104	692875	690920	1038728	1014241	1380169	1384431	1234463	1214878	898770	901425	1054253	1046000	1248499	1217166	1440937	1449027	1549605	1534228	1305647	1295639	967120	2114677	1431248	1448994	1099408	1078532	CPD-14740	CPD-14740 [ C15 H14 O5, tgt=66.15, overall=66.15 ]			(257.07892, 20838.174)(258.08206, 1581.0634)(295.13007, 51647.54)(296.1331, 9423.337)(297.1369, 430.6)	16.167
CPD-4885	569894	9209205	704189	694727	817639	8530915	8715794	1043563	8545009	6760205	327838	517265	826860	578668	957315	837261	8531484	8289566	5304749	5213652	576434	599322	780896	760864	524226	520486	802702	588623	509063	842101	CPD-4885	CPD-4885 [ C20 H20 O4, tgt=52.17, overall=52.17 ]			(325.13925, 11471.273)(326.1425, 1303.2744)(327.551, 1903.9641)(326.58057, 374066.25)(327.58347, 72020.02)(329.16086, 13176.823)(330.1636, 91.5)(309.14493, 962.01666)(344.18234, 78429.46)(345.18506, 13884.861)(346.18732, 758.3259)(349.1378, 120611.19)(350.14047, 21056.904)(351.14468, 2192.2937)	16.4887
CPD-14741	423349	1	1	1	1	1	1093562	960935	1248023	1247354	1	928908	1	1	1	1	1	1	1	1	1	1	1	903101	419959	399788	1	1	1	1	CPD-14741	CPD-14741 [ C16 H14 O6, tgt=66.17, overall=66.17 ]			(303.0816, 18806.336)(304.08316, 720.6684)(305.08908, 2971.8386)(285.07297, 17035.09)(286.07623, 1240.2334)(286.0872, 191.45)(325.1344, 9655.91)(330.0904, 28287.71)	9.594
CPD-4884	1	1	1	1	1	1	1	1	8965115	8775672	8298790	10000059	1	1	1	9452668	1	1	1	1	186828	182022	6133408	6920976	187920	169942	7768611	85109	1	1	CPD-4884	CPD-4884 [ C20H18O4, tgt= ]			(325.13266, 1178.1967)(325.13907, 1330.8463)(342.56195, 4972.4014)(327.15485, 2942.9111)(347.52084, 3513.2437)	11.7293
SOLANESYL-PYROPHOSPHATE	2773953	2595709	2304767	2596622	2712827	2641974	2604814	2502562	3549284	3415210	1	3684667	2838990	2706844	6298546	6091163	5045051	4986234	2640059	2630917	1	1699991	2897956	2711362	2967451	2287969	3630314	3337332	1	3201453	SOLANESYL-PYROPHOSPHATE	SOLANESYL-PYROPHOSPHATE [ C45 H73 O7 P2, tgt=56.03, overall=56.03 ]			(787.4888, 8791.313)(788.492, 3268.493)(771.7927, 12525.736)(772.7957, 4106.71)(774.0124, 59514.027)(774.51373, 30307.496)(775.5836, 6914.226)(776.5176, 81.72)(805.6528, 15699.1045)(806.6586, 6750.952)(807.97034, 12782.178)(809.5489, 9927.619)(810.53876, 5171.8604)(789.50635, 36328.727)(790.5165, 18594.39)(791.52313, 5289.1445)(814.8945, 14163.687)(815.8977, 5728.261)(813.501, 23068.113)(814.505,…	19.0554
CPD-14742	178674	170358	152106	147064	188868	176633	158293	159877	119816	123234	114772	1	1	1	175230	173568	1	1	110416	122226	110166	122725	108925	103684	84261	1	1	1	1	1	CPD-14742	CPD-14742 [ C21 H36 O10, tgt=14.00, overall=14.00 ]			(449.22916, 1952.8643)(433.2288, 290.8)(433.22958, 3170.1367)(469.41837, 5119.2134)(449.0756, 5866.0513)(453.20398, 5921.4644)	9.4628
GLUTARATE	705777	599614	499250	477735	499477	516059	782601	589437	342411	355833	437321	424648	946338	685565	555524	530981	595936	609930	852771	629242	502772	495884	626289	581432	930890	656629	601626	548588	703023	681579	GLUTARATE	GLUTARATE [ C5 H6 O4, tgt=40.40, overall=40.40 ]			(148.0591, 10623.872)(130.04886, 9503.333)	1.984
D-SORBITOL-6-P	1	1	1	1	1	1	352789	1	1	1	1	1	84141	1	1	1	1	1	250785	1	1	1	1	1	202339	1	1	1	1	1	D-SORBITOL-6-P	D-SORBITOL-6-P [ C6 H13 O9 P, tgt= ]			(284.02768, 4336.0073)(285.0284, 866.145)	1.395
CPD-9494	6287015	1	1	1	1	1	4484417	4015263	3662589	3534067	1	3851461	4533553	1	4384185	1	2824591	2808830	1	1	1	1	1	1	2969831	2693523	1958026	1	1	3201881	CPD-9494	CPD-9494 [ C7 H8 O3, tgt=91.78, overall=91.78 ]			(140.04488, 2231.0515)(140.06941, 1711.1543)(163.03795, 77079.15)(164.041, 5233.357)(165.053, 129.7)	4.2054
CPD-9499	3458995	3333114	2959338	3194910	3208123	3066093	2680838	2424382	2503897	2090201	1	2426648	2975783	2784541	1536809	1562472	1319679	1313814	2653058	2453223	2582370	2557758	2158526	1	2145470	1962065	2131427	2076158	1369347	2383267	CPD-9499	CPD-9499 [ C8 H10 O3, tgt=71.77, overall=71.77 ]			(137.05885, 6082.154)(177.05452, 39478.27)(178.05666, 2427.1365)(179.06825, 94.93429)(159.04257, 2093.758)	6.11313
CPD-5943	4036411	3634722	3901803	3831458	3679132	3717088	4151802	4035206	3785638	3805136	4996234	4293252	3778662	3952010	4250833	4226865	4378458	4436177	4574086	4538821	4980843	4710847	223874	219215	3601453	3665235	3326540	3285648	4439155	4378776	CPD-5943	CPD-5943 [ C12 H17 O3, tgt=71.20, overall=71.20 ]			(209.11594, 78502.06)(210.11877, 7064.2256)(211.12929, 762.8278)(191.10498, 24640.494)(192.10805, 1744.5945)(211.12874, 5407.497)(212.13055, 334.48502)(193.12013, 1990.34)(229.83061, 3104.0967)	4.8738
CPD-4894	3104482	3010030	1	1	1	3464831	1	1	1	1	1	1	1	6424887	6275969	6266645	6989378	7155188	1	1	1	1	1	1	4276718	4127714	3065020	3037253	4780834	4716770	CPD-4894	CPD-4894 [ C10 H16, tgt=80.60, overall=80.60 ]			(137.13193, 211418.33)(138.1348, 17968.33)(154.15779, 19807.553)(155.16086, 1139.7963)(159.11513, 257.82)	10.417
CPD-14751	1705894	1595864	2100515	2090079	1801453	1786071	2139871	578665	3858732	3790724	3159473	3160704	1833938	690485	2050076	2055349	824080	849715	764762	756737	793664	776132	675964	665482	837971	804034	1383831	1371797	967705	941113	CPD-14751	CPD-14751 [ C20 H26 N2 O2, tgt=30.78, overall=30.78 ]			(351.9881, 23095.121)(353.48676, 3517.377)(309.2021, 8628.885)(310.2052, 631.74835)(344.22476, 73006.234)(345.22736, 8971.109)(346.22888, 1204.5425)(327.1982, 31430.266)(328.201, 3374.5537)(331.1838, 23627.363)(332.18686, 3211.933)	6.88823
CPD-4890	3104482	3010030	1	1	1	3464831	1	1	1	1	1	1	1	6424887	6275969	6266645	6989378	7155188	1	1	1	1	1	1	4276718	4127714	3065020	3037253	4780834	4716770	CPD-4890	CPD-4890 [ C10 H16, tgt=80.60, overall=80.60 ]			(137.13193, 211418.33)(138.1348, 17968.33)(154.15779, 19807.553)(155.16086, 1139.7963)(159.11513, 257.82)	10.417
CPD-4892	3104482	3010030	1	1	1	3464831	1	1	1	1	1	1	1	6424887	6275969	6266645	6989378	7155188	1	1	1	1	1	1	4276718	4127714	3065020	3037253	4780834	4716770	CPD-4892	CPD-4892 [ C10 H16, tgt=80.60, overall=80.60 ]			(137.13193, 211418.33)(138.1348, 17968.33)(154.15779, 19807.553)(155.16086, 1139.7963)(159.11513, 257.82)	10.417
CPD-4891	3104482	3010030	1	1	1	3464831	1	1	1	1	1	1	1	6424887	6275969	6266645	6989378	7155188	1	1	1	1	1	1	4276718	4127714	3065020	3037253	4780834	4716770	CPD-4891	CPD-4891 [ C10 H16, tgt=80.60, overall=80.60 ]			(137.13193, 211418.33)(138.1348, 17968.33)(154.15779, 19807.553)(155.16086, 1139.7963)(159.11513, 257.82)	10.417
CPD-14854	513348	498272	545452	552985	505825	514719	488864	492806	523098	506488	700673	703782	580258	564284	581019	595252	593483	591235	680225	667657	715808	690784	592740	603672	663228	629143	546406	550723	696196	688567	CPD-14854	CPD-14854 [ C19 H18 O8, tgt=38.65, overall=38.65 ]			(375.10315, 25665.81)(376.1061, 3374.4219)(397.15665, 1335.301)(397.08438, 2514.4558)	13.824
CPD-14853	3021283	2870692	3023152	2976857	2883485	2887730	2162501	2104078	1	2079175	1	2641213	2288729	2182461	2504734	1	2244092	2242575	1	1	1	1	1	1	2117164	1978199	1904724	1870025	2369300	2327362	CPD-14853	CPD-14853 [ C18 H16 O8, tgt=65.59, overall=65.59 ]			(361.0887, 102744.68)(362.09125, 15921.548)(363.09344, 1094.4678)(365.1125, 403.428)(383.06937, 3973.2478)	11.6658
CPD-14852	427755	413862	510190	502625	454485	441206	576456	1	1	1	474550	474659	595172	542909	582208	602034	1	1	1	560326	554403	532625	1	1	579676	1	1	1	564971	552520	CPD-14852	CPD-14852 [ C19 H18 O7, tgt=67.69, overall=67.69 ]			(359.10825, 20949.8)(360.11133, 2634.9355)	9.2026
CPD-9476	1085446	1051239	1099427	1066283	1029791	969052	1035631	997804	1207474	1200348	915294	878643	1153156	1049005	910452	938196	857127	875823	993210	945223	828886	804948	1011100	982683	1059573	955007	1249726	1209180	877712	905441	CPD-9476	CPD-9476 [ C30 H44 O6, tgt=65.90, overall=65.90 ]			(501.31448, 23917.014)(502.3171, 6028.9976)(483.3035, 5550.977)(484.3063, 447.915)	9.4682
5734-TETRAHYDROXYFLAVONE	916502	841872	1168988	1124485	982361	981593	990144	862925	1146336	1230547	1	879379	946025	833216	974545	982917	930009	936056	899536	798565	1	1	919085	879915	857156	730461	963285	920441	928122	901336	5734-TETRAHYDROXYFLAVONE	5734-TETRAHYDROXYFLAVONE [ C15 H9 O6, tgt=14.19, overall=14.19 ]			(289.0636, 3049.1233)(303.08133, 19607.455)(304.08307, 639.4068)(305.07465, 1429.415)(289.06543, 3898.93)(291.9269, 2230.1655)(292.01874, 688.51)	2.09107
CPD-9477	157017	150556	117183	118260	123178	135473	1	1	167711	173737	1	1	97722	1	100266	100200	1	1	206786	197088	162115	155176	201798	188113	110708	96825	96697	101609	1	1	CPD-9477	CPD-9477 [ C36 H55 O11, tgt=1.48, overall=1.48 ]			(665.3964, 7863.705)(666.3992, 1783.3108)(650.39166, 1069.8474)(681.4202, 9970.683)(665.3946, 10215.85)(666.3975, 2811.9277)(687.3767, 383.13248)	14.3964
CPD-632	152060	148539	107354	111763	147780	154930	1	1	1	1	1	1	393297	1	440473	430598	255072	347331	1	1	1	1	1	1	303176	294681	405315	501537	302116	308551	CPD-632	CPD-632 [ C19 H20 O6, tgt=45.52, overall=45.52 ]			(371.12848, 1871.5792)(327.1281, 941.19995)(345.12955, 4558.0396)(345.1334, 408.57)(366.17065, 2974.6196)(345.13855, 10082.898)(346.1467, 526.11)(351.1167, 10664.41)(352.107, 786.82)(345.14307, 8706.048)	7.16347
MEVALONATE	367535	369655	654130	666956	508993	498660	624005	625352	723310	720172	782893	807712	790234	800081	827039	830496	701313	693327	814139	812388	761505	745994	799274	785395	1023429	1023517	505159	509037	765256	764650	MEVALONATE	MEVALONATE [ C6 H11 O4, tgt=43.92, overall=43.92 ]			(147.06169, 4560.7207)(133.06375, 308.97)(153.08942, 673.81775)(130.064, 6380.1987)(149.09476, 452.91373)(170.0585, 20841.104)(171.06175, 1015.5873)	4.2966
BETA-D-FRUCTOSE	1881516	1775169	1015623	1038205	1445338	1446910	2090213	1942997	1764508	1732692	1499740	1469236	1025401	961814	1310607	1268838	1385363	1374892	1673864	1563560	1470763	1476630	1517889	1524058	2227394	2009619	2323737	2291864	2013114	1978317	BETA-D-FRUCTOSE	BETA-D-FRUCTOSE [ C6 H12 O6, tgt=75.37, overall=75.37 ]			(163.0586, 1073.2479)(180.08531, 77440.336)(181.08778, 4069.329)	7.8962
CPD-9470	202311	203940	201331	209535	128028	247541	264824	254777	344083	331617	256599	263194	371014	352442	347863	348257	272526	283058	535773	517886	393339	385515	596626	563018	239336	254659	189683	296350	274678	266588	CPD-9470	CPD-9470 [ C30 H45 O4, tgt=59.81, overall=59.81 ]			(453.33047, 15457.637)(454.33325, 4082.5347)(453.33105, 4941.5903)(471.3414, 6214.2524)	14.8634
CPD-9472	84841	362000	399279	399141	364923	322113	191075	101369	77941	197234	1677105	1694562	859478	79504	1537660	1456006	92556	91902	1346535	1323472	713618	1	77843	1542101	79200	875164	117687	121683	1682794	1652754	CPD-9472	CPD-9472 [ C36 H56 O9, tgt=46.79, overall=46.79 ]			(633.393, 572.6743)(614.379, 11802.186)(615.3817, 1573.1628)(635.1429, 8598.628)(637.39453, 3016.5457)(615.4035, 13766.183)(616.4018, 3210.139)(656.5154, 3697.2107)(659.40796, 1711.5638)(661.3834, 668.67004)(638.42615, 2678.2869)(638.376, 399.98)	14.4401
CPD-9475	168639	150399	2130533	2054940	127579	123872	129897	123941	2043086	2085030	1308156	1311092	119146	133634	1062337	1064515	129028	129340	263546	240615	197807	184824	127165	120289	124910	130181	189352	183355	681804	700046	CPD-9475	CPD-9475 [ C36 H55 O10, tgt=62.13, overall=62.13 ]			(648.9489, 31929.332)(649.95154, 7703.82)(650.3773, 1432.2561)(630.876, 6169.9766)(632.3789, 1001.4814)(631.37415, 6633.628)(665.3946, 10527.266)(666.3975, 2897.89)(675.3806, 1414.1025)(653.36755, 3085.755)	8.77007
MIMOSINE	116984	96241	1	1	1	1	1	101703	108719	83823	1	1	168714	92299	108429	1	99440	1	131860	86133	83143	1	1	1	137438	89750	85625	1	110510	1	MIMOSINE	MIMOSINE [ C8 H10 N2 O4, tgt=47.50, overall=47.50 ]			(185.06522, 930349.9)	1.39755
CPD-14848	622460	553997	1	550734	549794	528727	556174	468857	508421	499985	713873	694131	633947	605756	1	623228	557624	536605	854603	750293	788600	777568	632390	1	911720	802578	511684	505806	651124	653408	CPD-14848	CPD-14848 [ C27 H30 O15, tgt=58.45, overall=58.45 ]			(595.1588, 15986.243)(596.16144, 3348.71)(577.1616, 1517.3134)	5.442
SHIKIMATE	196968	128827	147080	168604	149125	120924	222656	164879	194581	172840	183331	156194	285781	201166	186643	146849	130610	163436	280888	177049	165008	177671	167108	177711	257550	181275	145913	159573	179809	191171	SHIKIMATE	SHIKIMATE [ C7 H9 O5, tgt=30.32, overall=30.32 ]			(157.03743, 1770.4371)(174.05551, 4547.19)(156.04385, 4321.651)(201.04271, 36171.047)	1.3948
CPD-14846	309746	309507	395960	409090	343580	357010	640781	647668	640569	612850	1	542769	725466	721953	867269	988198	1169601	1170930	717582	817546	823737	825943	812428	744752	544845	510653	386320	356040	718428	688611	CPD-14846	CPD-14846 [ C21 H23 N O6, tgt=47.56, overall=47.56 ]			(372.16095, 7853.4287)(373.16394, 844.20703)(403.79312, 523.21106)(391.13187, 21424.361)(392.1347, 3000.7024)(385.18076, 5566.191)	10.3016
CPD-14842	546688	446125	271834	283455	362006	363604	531484	78066	70608	67361	246922	238556	557328	519440	252316	266482	239935	244667	697529	586265	736485	806536	72750	438587	552136	443089	309680	302795	280044	268385	CPD-14842	CPD-14842 [ C6 H3 Cl N2 O6 S, tgt=22.38, overall=22.38 ]			(268.9433, 16251.496)(270.94235, 1480.6683)(268.94382, 10880.514)(270.19702, 1808.265)(270.94705, 2991.7234)(272.9513, 11157.26)(273.9524, 1004.57)(255.93697, 2914.4001)(271.9534, 1571.8866)(288.92914, 1937.4733)	1.995
CPD-14844	167692	138811	100056	99847	81744	92749	1	1	118838	154731	199679	134506	1	102341	94653	77952	1	1	1	1	1	234671	1	1	83095	75203	1	1	1	1	CPD-14844	CPD-14844 [ C27 H30 O18, tgt=21.83, overall=21.83 ]			(666.1518, 9484.66)(667.1542, 1732.125)(644.1526, 3529.9534)(644.1538, 4473.2217)	6.44487
2-UNDECANONE	1440653	1030146	1436596	1406065	1363599	1168892	1383048	1189595	1635929	1752676	1495716	1213716	1563641	1528640	1214007	1202323	915304	1011707	1364861	1376267	1084929	1049963	1465130	1453280	1331465	1797154	1500563	1475759	1195319	1183499	2-UNDECANONE	2-UNDECANONE [ C11 H22 O, tgt=82.95, overall=82.95 ]			(193.15688, 2079.6199)(175.14677, 62910.527)(176.14984, 6841.8027)(177.162, 460.0)	5.1075
CPD-14843	277392	278761	436551	433761	338142	327221	693488	636009	484671	484539	1	491237	717784	645326	734131	727197	820135	833626	792800	720092	1	1	665169	605256	677783	592138	404509	371450	1	1	CPD-14843	CPD-14843 [ C21 H20 O13, tgt=11.99, overall=11.99 ]			(462.09, 12827.969)(463.09174, 1530.2974)(498.23102, 4850.686)(500.116, 1538.16)(480.10138, 16552.014)(481.10223, 2413.873)	9.18836
13-DIHYDROXY-N-METHYLACRIDONE	89644	83682	105991	105150	80508	91184	110723	85260	93897	94115	103101	99884	109758	79876	109126	81260	118063	113285	102624	77463	72097	69643	101861	99959	67434	69755	94101	98558	105429	91970	13-DIHYDROXY-N-METHYLACRIDONE	13-DIHYDROXY-N-METHYLACRIDONE [ C14 H11 N O3, tgt=61.53, overall=61.53 ]			(229.0901, 2358.7795)(243.10556, 8254.386)(244.1068, 971.536)(245.1042, 671.12)(265.07388, 504.82202)(246.05655, 3317.8813)(247.05624, 791.679)	1.435
CPD-3728	305322	115225	328872	332656	298299	299127	172107	318844	547517	522665	434487	418520	504545	423951	366170	366243	314773	311116	431760	343402	169203	270600	400531	396408	411671	341707	389699	387970	305276	309319	CPD-3728	CPD-3728 [ C9 H10 N O6 P, tgt=22.34, overall=22.34 ]			(259.0273, 6322.848)(260.02896, 499.54114)(261.02554, 519.54224)(243.0151, 183.4)(263.0469, 159.56)(277.0641, 5465.2896)(287.02164, 4342.3022)	2.1206
CPD-9482	2705478	2565191	1480456	1419319	1228835	1228945	2979946	2866235	394357	282869	1277712	155733	2581545	2520829	1	1088445	1006221	1033755	1368056	1322428	2372270	1750733	1234535	1111088	2851601	2781490	1018997	984816	1158469	1	CPD-9482	CPD-9482 [ C30 H48 O3, tgt=60.49, overall=60.49 ]			(456.8416, 11576.801)(457.36493, 5712.9424)(439.34256, 3396.2854)(457.36166, 2071.2634)(439.35156, 21205.041)(440.35452, 5031.0234)(479.34277, 1181.2924)	18.6881
CPD-9481	147352	136308	248834	255344	188328	194455	226656	187003	327361	312364	227067	207705	358646	329135	329769	310793	283529	288213	591559	565971	456885	450128	604984	544556	240201	227150	212668	202304	222382	204500	CPD-9481	CPD-9481 [ C30 H47 O4, tgt=43.67, overall=43.67 ]			(495.3361, 1817.8066)(455.34534, 10588.185)(456.34848, 1486.7961)(473.35535, 4484.476)(474.35828, 225.33499)(473.356, 3477.152)	16.2828
CPD-9483	1085446	1051239	1099427	1066283	1029791	969052	1035631	997804	1207474	1200348	915294	878643	1153156	1049005	910452	938196	857127	875823	993210	945223	828886	804948	1011100	982683	1059573	955007	1249726	1209180	877712	905441	CPD-9483	CPD-9483 [ C30 H44 O6, tgt=65.90, overall=65.90 ]			(501.31448, 23917.014)(502.3171, 6028.9976)(483.3035, 5550.977)(484.3063, 447.915)	9.4682
CPD-14834	216373	16690154	347951	333926	274460	18082316	729672	23976304	20405314	20310940	1	604197	740946	23336050	25208940	24985424	1110746	1103158	937538	939128	965684	966469	1	856823	22698302	545535	18951148	18961516	24329880	671989	CPD-14834	CPD-14834 [ C22 H23 N O7, tgt=47.49, overall=47.49 ]			(416.15005, 37935.06)(417.1521, 12092.555)(418.15375, 1254.395)(396.2797, 10751.838)(396.13205, 3412.073)(416.15106, 80100.64)(417.15353, 12435.342)(418.15515, 1423.0193)(400.15524, 320.78726)(431.17014, 305993.12)(432.1714, 53580.758)(433.1737, 11226.892)(436.1248, 58611.227)(437.1237, 15156.455)	8.9966
CARBAMYUL-L-ASPARTATE	206568	185748	184727	187128	186692	185407	241044	184910	218914	202998	178803	155601	309304	244566	189275	180688	150071	147560	293693	218045	249831	250895	192544	180316	255216	193609	173862	177861	182526	184854	CARBAMYUL-L-ASPARTATE	CARBAMYUL-L-ASPARTATE [ C5 H6 N2 O5, tgt=36.00, overall=36.00 ]			(176.68863, 3731.8872)(176.63431, 1691.0602)(177.0322, 2869.9648)(157.95282, 1218.4576)(159.02223, 4681.063)(160.02122, 1468.6777)(175.03555, 8255.3545)(176.03732, 876.5375)(174.05547, 3500.7231)	1.446
CPD-14836	106632	102951	106967	108402	106031	79723	80989	84887	85523	81937	81406	79099	122104	112400	1	1	1	1	114750	94756	79170	84636	85711	74933	130510	124861	149945	156853	111836	105468	CPD-14836	CPD-14836 [ C45 H60 O26, tgt=15.76, overall=15.76 ]			(1000.3206, 8080.6245)(1001.32355, 3398.093)(1039.3655, 4846.5234)(1040.3684, 1747.9834)	7.3309
CPD-14839	1	153192	320661	316490	227806	220093	550887	538258	402460	408183	415348	406493	563905	542318	687971	683983	828214	840482	663205	656693	650196	641459	594039	569913	501248	456623	262643	257237	601064	580706	CPD-14839	CPD-14839 [ C32H38O17, tgt= ]			(678.2162, 34649.21)(679.2188, 8671.703)(680.22015, 1326.3298)	9.1864
CPD-14832	288468	274848	172438	206733	247447	231644	422209	447475	828933	818502	369190	1	582759	257515	351611	704278	395074	354045	1	394684	2921866	2944443	1	2912871	505234	530213	298818	282606	229193	338679	CPD-14832	CPD-14832 [ C22 H25 N O7, tgt=40.78, overall=40.78 ]			(415.1527, 20654.799)(416.15594, 2881.0566)(399.65778, 42749.66)(398.14438, 16808.09)(399.1461, 1011.8333)(419.69745, 3123.3984)(419.1859, 832.9634)(402.1041, 5955.6387)(402.17783, 1841.2067)(435.96017, 18365.21)(437.58606, 7327.866)(438.2123, 4031.5215)(419.1855, 920.73)(440.34714, 26265.613)(441.48193, 33683.01)(442.48575, 5451.701)(423.15683, 711.0613)(425.15085, 844.8612)	7.16263
CPD-14831	954992	926184	802669	819562	868478	839449	132397	135777	1137038	1129953	453751	1287672	1315609	481879	1113063	663170	1086112	1082504	1145307	1	374356	381458	326126	321915	1482593	1257609	1106523	1064098	1095442	1094217	CPD-14831	CPD-14831 [ C21 H23 N O7, tgt=47.47, overall=47.47 ]			(404.14798, 2129.9575)(405.1461, 11332.03)(406.1489, 1359.65)(385.6187, 3934.0283)(387.47522, 2349.1272)(388.1526, 329.23553)(389.157, 6691.09)(419.18533, 4322.308)(420.18884, 1639.4366)(401.17447, 14690.317)(402.17856, 1488.4368)(425.2534, 2370.264)(427.98715, 1132.1533)(407.1401, 1331.85)	6.2124
CPD-14830	309746	309507	395960	409090	343580	357010	640781	647668	640569	612850	1	542769	725466	721953	867269	988198	1169601	1170930	717582	817546	823737	825943	812428	744752	544845	510653	386320	356040	718428	688611	CPD-14830	CPD-14830 [ C21 H23 N O6, tgt=47.56, overall=47.56 ]			(372.16095, 7853.4287)(373.16394, 844.20703)(403.79312, 523.21106)(391.13187, 21424.361)(392.1347, 3000.7024)(385.18076, 5566.191)	10.3016
MALEATE	276130	256457	1	1	251975	257529	296809	258796	1	1	1	1	315731	278935	1	1	1	1	317366	277087	271966	279288	1	1	310096	274485	281995	1	1	1	MALEATE	MALEATE [ C4 H2 O4, tgt=29.48, overall=29.48 ]			(114.0156, 20848.924)(137.99026, 2030.1445)	1.3974
CPD-9459	862493	799481	1131926	1097567	955557	940827	914663	872858	1059336	1001631	991475	975157	992317	968277	903691	840288	797300	812254	1052403	1033734	1027689	1060693	958384	877835	718925	696635	781717	756243	891210	847687	CPD-9459	CPD-9459 [ C30 H47 O3, tgt=65.69, overall=65.69 ]			(479.34274, 1140.8258)(439.3514, 20330.783)(440.35437, 4734.443)(457.36148, 1908.7617)	18.3434
CPD-653	610784	547550	494478	489878	508183	490352	538528	507897	450574	441746	572490	555991	502602	442585	506753	511359	414000	432036	262170	260504	265742	271270	198702	205342	363964	326854	313755	319700	466310	465525	CPD-653	CPD-653 [ C21 H29 N7 O15 P2, tgt=46.39, overall=46.39 ]			(681.1493, 11309.224)(682.152, 2884.5513)	13.2816
CPD-648	517579	477420	693663	500703	476149	657048	906790	150969	187026	755221	795925	800963	937754	144127	723797	130279	903611	867702	1254128	1013145	893556	891823	937726	951868	1207973	964734	827605	797552	958476	905173	CPD-648	CPD-648 [ C8 H7 N O2, tgt=46.09, overall=46.09 ]			(150.05373, 4638.399)(152.05592, 5416.4644)(137.05829, 4531.5547)	2.6988
CPD-14829	516995	263775	316990	613739	251096	275627	358078	255802	842071	848071	595804	603923	400965	1	1	758494	759106	750365	796835	774170	730328	214990	233006	221242	369575	718278	250890	252723	621518	614174	CPD-14829	CPD-14829 [ C21 H24 N O5, tgt=63.47, overall=63.47 ]			(372.64688, 5476.5376)(352.65427, 2551.9685)(354.70148, 2554.6626)(355.16766, 8102.258)(373.1776, 245.08499)(355.16855, 1201.8801)(388.20013, 9343.554)(389.20334, 1872.0331)(370.27377, 750.7142)(393.95224, 536.948)(376.07147, 18799.412)(376.1451, 4851.016)	5.60813
CPD-14825	1	88786	7315611	7033107	9705407	9466785	1	91698	5685333	5278170	4247481	4152696	10844308	10502525	5863027	5174858	4571481	4634562	8431136	7278942	9439372	9767983	5225119	5074249	9710437	9632536	6154583	5718250	357513	349996	CPD-14825	CPD-14825 [ C27 H30 O16, tgt=66.86, overall=66.86 ]			(612.13354, 17847.906)(613.13306, 5032.962)(614.1727, 972.1301)(612.1776, 20038.84)(613.1773, 5567.48)(614.1751, 1271.45)(628.1865, 4929.785)(629.188, 1915.395)(630.1855, 417.09)(610.1772, 51326.645)(611.1775, 27007.18)	23.7239
CPD-15590	1881516	1775169	1015623	1038205	1445338	1446910	2090213	1942997	1764508	1732692	1499740	1469236	1025401	961814	1310607	1268838	1385363	1374892	1673864	1563560	1470763	1476630	1517889	1524058	2227394	2009619	2323737	2291864	2013114	1978317	CPD-15590	CPD-15590 [ C6 H12 O6, tgt=75.37, overall=75.37 ]			(163.0586, 1073.2479)(180.08531, 77440.336)(181.08778, 4069.329)	7.8962
3-AMINOPROPYL-METHYL-PHOSPHINATE	3311795	3248211	2098585	2076266	2639318	2628555	2940239	3199926	2971108	2934953	2609548	2609931	1700307	1774802	2434203	2511077	2447615	2462633	2456641	2496588	2530331	2506406	2539878	2555520	3202538	3432776	3906936	3796930	3450794	3472686	3-AMINOPROPYL-METHYL-PHOSPHINATE	3-AMINOPROPYL-METHYL-PHOSPHINATE [ C4 H12 N O2 P, tgt=78.73, overall=78.73 ]			(137.0589, 106818.46)(138.06192, 6852.5493)(163.0586, 1009.887)(145.0484, 7173.548)	7.8962
CPD-14824	622460	553997	1	550734	549794	528727	556174	468857	508421	499985	713873	694131	633947	605756	1	623228	557624	536605	854603	750293	788600	777568	632390	1	911720	802578	511684	505806	651124	653408	CPD-14824	CPD-14824 [ C27 H30 O15, tgt=58.45, overall=58.45 ]			(595.1588, 15986.243)(596.16144, 3348.71)(577.1616, 1517.3134)	5.442
CPD-3713	159064	156970	197044	199688	166435	171009	186124	151785	242717	227564	157287	198730	190895	144370	186131	207621	188251	172051	141716	1	1	1	1	1	118759	113684	112620	122781	186117	178520	CPD-3713	CPD-3713 [ C9 H11 N3 O7 P, tgt=46.86, overall=46.86 ]			(287.021, 6404.1055)(287.02194, 5941.5435)(323.0709, 374.97665)(307.04037, 3022.9163)(305.0662, 2254.444)	2.1406
CPD-9469	670162	659132	693577	699259	692467	672622	736297	706766	786961	772388	688260	688006	721448	709106	736249	743377	733906	727754	787632	773872	589688	594649	825421	811727	598596	592332	412903	420836	792888	787916	CPD-9469	CPD-9469 [ C48 H74 O19, tgt=24.53, overall=24.53 ]			(973.53906, 24884.762)(974.5418, 12127.066)(975.5499, 10924.571)(976.5548, 1984.1267)	19.4284
CPD-3711	311142	1	237767	233527	286492	280020	364037	349223	263521	260914	1	269025	354389	316949	380677	378888	449412	442758	396053	392260	377069	394662	350096	337673	344468	316455	217366	224243	354327	339799	CPD-3711	CPD-3711 [ C9 H12 N3 O8 P, tgt=46.86, overall=46.86 ]			(303.01648, 5645.01)(322.63467, 946.7575)(307.04, 1764.374)(339.96387, 16761.926)(340.07037, 1746.6836)(321.1406, 2464.433)	7.94531
CPD-9464	998709	975164	1028228	1040103	1026912	999020	1093210	1056630	1167018	1	1	1018248	1070419	1050760	1098045	1107332	1087804	1084748	1174129	1160641	877692	878432	1	1	886918	877435	616280	619130	1176752	1172902	CPD-9464	CPD-9464 [ C48 H75 O19, tgt=16.36, overall=16.36 ]			(973.5394, 24923.41)(974.54193, 12190.802)	19.4286
CPD-633	109399	1	75918	73196	78457	80312	133641	1	80416	1	1	1	1	100805	78664	1	1	1	146670	83907	74889	86348	1	76081	148885	100782	1	1	1	1	CPD-633	CPD-633 [ C7 H5 O4, tgt=6.64, overall=6.64 ]			(135.0116, 416.15)(157.03651, 1367.9667)(171.04887, 4799.492)(153.03827, 1098.5208)	1.39259
CPD-9462	11823763	256900	177034	159246	208027	8433484	7502344	6583142	3380068	3257633	2761709	241475	7740605	7091371	3266246	3135492	2279780	2328621	5283056	5302601	6318703	5768810	3567994	3465838	5880323	6150295	160881	156745	4053889	3608292	CPD-9462	CPD-9462 [ C42 H65 O14, tgt=19.41, overall=19.41 ]			(795.4397, 7860.63)(796.4431, 1680.315)(811.6326, 85867.35)(812.6354, 37216.793)(815.4741, 884.18)(793.4622, 1340.7476)	18.6854
CPD-634	232449	218080	1	1	147947	1	262439	270071	1	242988	1	1	278998	294299	1	187013	302909	304900	1	1	1	1	1	219122	267371	257135	402995	380206	186214	183265	CPD-634	CPD-634 [ C28 H48 O5, tgt=31.53, overall=31.53 ]			(487.33472, 1524.6041)(469.32498, 11631.929)(470.32828, 1704.8456)	8.42063
CPD-9461	74392	73498	1	3878386	5614374	5880235	5245012	5173156	2363073	2281016	1934359	170591	5465899	5543623	2531044	2417070	1594715	1629503	3697086	3705197	4478099	4032471	2497151	2432748	4113211	4287522	319004	326977	316245	2793364	CPD-9461	CPD-9461 [ C42 H64 O14, tgt=34.33, overall=34.33 ]			(775.41425, 6190.763)(776.42035, 929.1933)(811.68066, 83628.836)(812.53186, 37827.43)(815.4719, 1118.23)(793.4607, 2922.185)	19.0059
CPD-638	18592864	17459154	16498742	16255171	17050976	14285275	20743260	25617404	30355040	29836292	27033936	23295080	24131240	17992392	28201672	28114040	31203452	31390448	30831166	26967724	28689144	1462676	1461847	24469610	40776616	39239408	27333780	30569364	25707420	25396476	CPD-638	CPD-638 [ C20 H25 O5, tgt=78.09, overall=78.09 ]			(345.16895, 63604.19)(346.16995, 9060.63)(327.15692, 706998.4)(328.15988, 137247.27)(329.1612, 19514.271)(330.16345, 1417.1599)(345.18524, 18785.86)(346.1875, 1487.4983)(372.1764, 585.96893)(350.1407, 32353.016)(351.1442, 3125.5134)	16.0478
CPD-14816	168201	258266	132906	138615	155440	180857	270707	326684	345078	208397	137126	1	333161	204974	199821	162087	418319	237737	1	451664	317901	297873	477448	474737	347637	1	420684	398915	289270	139494	CPD-14816	CPD-14816 [ C28 H40 N2 O4, tgt=67.09, overall=67.09 ]			(455.30933, 8970.969)(456.31223, 1806.1338)(457.3214, 552.37384)(473.3194, 3059.5903)(474.32254, 489.44003)(487.33447, 1564.5222)(469.32465, 8798.486)(470.32806, 1737.61)	9.30803
CPD-14817	191336	166245	181173	188071	168592	177304	181110	177035	274906	258394	1	165325	1	1	175587	175927	183006	172055	179003	1	147471	143752	1	187125	183441	175615	1	1	171949	171482	CPD-14817	CPD-14817 [ C29 H42 N2 O4, tgt=46.74, overall=46.74 ]			(483.20523, 6485.0327)(485.32788, 357.065)(469.32468, 1667.8857)(488.3413, 1777.725)(469.2286, 1691.0104)(469.8251, 2005.64)	10.1704
CPD-14818	1767036	1694889	1641340	1618775	1602058	1614714	1603827	1591420	1998240	1997948	2210466	1493184	1802879	1731357	1521150	1538069	1451591	1425882	1620116	1631636	1436337	1558936	2444475	1815217	1647914	1531263	1906730	1878682	1471772	1463196	CPD-14818	CPD-14818 [ C27 H38 N2 O4, tgt=81.08, overall=81.08 ]			(473.31985, 16087.568)(474.3228, 3781.552)(455.3101, 44794.99)(456.3128, 11043.752)(457.32205, 4102.6436)(458.3255, 309.39502)(483.30273, 5116.779)	9.4682
CPD-14812	584117	260960	193825	243228	238590	255987	385631	301574	414462	465149	240892	242713	712013	416559	930657	919490	679856	1	228569	785412	653302	627048	277920	268588	346881	874526	573454	545699	288551	257548	CPD-14812	CPD-14812 [ C26 H36 N O11, tgt=42.32, overall=42.32 ]			(540.0109, 9907.589)(541.0114, 1237.7999)(543.23364, 939.39996)(525.2229, 1132.5985)(526.2214, 2898.2)(539.5133, 6302.5947)(541.23627, 773.6225)(542.25226, 1610.5026)(543.2358, 3540.8523)(525.5656, 860.9283)(526.64465, 1516.884)(527.2375, 1376.1768)(538.24066, 6526.5)(564.63464, 1762.356)(566.90814, 3129.7969)(547.21747, 1105.2573)	6.26127
PALMITATE	350124	346517	336797	332367	330040	328975	526546	513995	586452	583231	406137	421380	619799	596778	547485	546038	592110	609413	573023	577888	493403	487537	596086	564383	497894	477700	482929	480878	418608	422811	PALMITATE	PALMITATE [ C16 H31 O2, tgt=49.68, overall=49.68 ]			(278.2168, 24623.396)(279.22516, 3144.8345)(261.21896, 9113.5625)(262.22195, 1365.9478)(264.2302, 864.5975)	15.426
CYTIDINE	99457	77501	91903	99529	89875	91286	135023	1	93911	335068	326748	89440	160656	95257	96549	78513	96006	1	564069	555302	567012	555987	522854	536054	147364	96958	85432	96713	101045	98527	CYTIDINE	CYTIDINE [ C9 H13 N3 O5, tgt=50.10, overall=50.10 ]			(247.0948, 2386.99)(228.01906, 3374.3398)(247.0941, 1305.855)(230.03423, 16902.229)(243.77507, 5470.096)(244.1069, 860.8354)(245.1044, 393.02)(271.0788, 4125.18)	3.98793
CPD-14813	1129698	1082850	1358457	1319907	1189026	1189391	1839316	1781479	1936858	1901092	1881714	1882452	1402620	1335115	1932884	1940495	2419439	2422407	2662843	2519289	2443578	2408234	2462610	2449059	2000055	1843664	1287131	1292263	1882280	1829415	CPD-14813	CPD-14813 [ C20 H26 N O6, tgt=27.73, overall=27.73 ]			(394.20306, 83100.25)(395.20538, 12382.709)(396.2069, 1071.049)(399.15762, 18329.615)(400.16055, 1900.4987)(386.17688, 1895.0227)	9.7672
CPD-14814	1398169	909832	1847234	1491913	1329239	851863	723376	1102706	1346317	1338652	1324009	979661	647081	132200	181344	176898	1398787	1374622	1116512	1183013	188082	978269	1022182	309280	527220	159127	1003619	608595	1411105	252152	CPD-14814	CPD-14814 [ C21 H28 N O6, tgt=57.55, overall=57.55 ]			(394.0694, 10196.92)(395.1279, 776.9107)(373.5518, 11227.968)(374.51407, 884.5317)(393.26282, 2647.4778)(394.20593, 269.96002)(373.1782, 13660.633)(374.18207, 887.85895)(418.2026, 251.1)(397.1823, 222.47)	6.65873
SANGUINARINE	3365432	3276317	1	1	1	1	3181291	3335331	2635728	2596140	1	1	1505037	1525280	1	1	2569407	2572436	2480438	2629707	2639181	2629192	2616573	2576064	3598364	3757517	4381583	4381073	3660837	3651776	SANGUINARINE	SANGUINARINE [ C20 H14 N O4, tgt=74.37, overall=74.37 ]			(350.126, 149312.0)(351.1194, 23775.484)(352.1198, 1289.586)	7.8896
1-O-GALLOYL-BETA-D-GLUCOSE	337186	1	490360	487323	1	1	317636	320583	556431	554501	1	373505	296029	280422	379127	1	1	304823	197951	1	1	1	267199	286168	223032	1	426345	421639	1	1	1-O-GALLOYL-BETA-D-GLUCOSE	1-O-GALLOYL-BETA-D-GLUCOSE [ C13 H16 O10, tgt=28.49, overall=28.49 ]			(337.08096, 543.9471)(319.07037, 5283.7354)(333.0908, 8383.14)(319.07355, 5359.556)(351.16428, 39048.33)(352.10452, 4164.4897)(332.10144, 7670.4634)	2.148
CPD-15576	998709	975164	1028228	1040103	1026912	999020	1093210	1056630	1167018	605576	403078	1018248	1070419	1050760	1098045	1107332	1087804	1084748	1174129	1160641	877692	878432	513248	408671	886918	877435	616280	619130	1176752	1172902	CPD-15576	CPD-15576 [ C48 H75 O19, tgt=16.36, overall=16.36 ]			(939.4927, 1904.6499)(973.5394, 24923.41)(974.54193, 12190.802)(955.52954, 6141.2876)(956.532, 3076.4224)	20.5433
CPD-16620	120318	114222	187947	196660	161651	154921	270887	268858	1	1	1	204486	1	1	268787	256342	309719	321367	351716	341093	294013	283033	364324	357305	279629	269173	317135	292097	281212	250141	CPD-16620	CPD-16620 [ C30 H50 O2, tgt=49.71, overall=49.71 ]			(447.39774, 2526.6777)(425.37122, 3773.6094)(425.36984, 4869.9307)(464.42453, 8856.754)(465.42743, 1155.7888)(469.3801, 747.1299)(448.37302, 9500.017)(449.37552, 1755.8542)	21.4916
CPD-16621	120318	114222	187947	196660	161651	154921	270887	268858	1	1	1	204486	1	1	268787	256342	309719	321367	351716	341093	294013	283033	364324	357305	279629	269173	317135	292097	281212	250141	CPD-16621	CPD-16621 [ C30 H50 O2, tgt=49.71, overall=49.71 ]			(447.39774, 2526.6777)(425.37122, 3773.6094)(425.36984, 4869.9307)(464.42453, 8856.754)(465.42743, 1155.7888)(469.3801, 747.1299)(448.37302, 9500.017)(449.37552, 1755.8542)	21.4916
CPD-16624	1	2992687	4156772	4129776	3487525	3393099	772344	702669	489988	477352	1664197	1618311	1341822	1215955	2759772	2770691	1143991	1140569	1202149	1148142	599683	595596	1531571	1469920	1430057	1314175	944220	942081	2749579	2700710	CPD-16624	CPD-16624 [ C54H81NO21, tgt= ]			(1084.5333, 21408.836)(1085.5363, 11865.174)(1086.5378, 2720.0115)(1084.5374, 38518.992)(1085.5402, 22002.016)(1086.5419, 5735.6616)	16.6754
CPD-16625	388481	382488	262781	816860	769851	755339	617225	630793	827115	828230	490991	1	322272	312033	364404	375618	199417	184213	192381	204365	88355	1	265189	264273	421511	385043	1027740	980659	526896	527562	CPD-16625	CPD-16625 [ C41 H66 O15, tgt=46.86, overall=46.86 ]			(804.47845, 11230.9)(781.2992, 17850.559)(781.8043, 5861.575)(782.4544, 1385.087)(804.4811, 8019.51)	8.7718
CPD-18156	235646	244752	246305	257463	250589	245153	372378	245248	1	218889	203255	198754	266563	193016	198924	1	216462	1	351210	248956	235972	237438	224998	222118	238464	175351	199712	194163	255428	249024	CPD-18156	CPD-18156 [ C26 H27 O14, tgt=17.90, overall=17.90 ]			(547.14966, 13216.957)(548.15265, 2028.9036)(547.15155, 14318.13)(548.15436, 2318.2825)(549.1519, 303.39)(581.1821, 375.69)	5.5824
CPD-18157	7142504	6931555	7124184	7055961	6711293	6642192	8184921	7670588	7879950	7735896	8121581	8110131	8166782	7613091	7930184	7774597	7346669	7405342	7454598	7054752	7954550	7853262	5894845	5764172	8269094	7764260	5637348	5652481	7011897	6908456	CPD-18157	CPD-18157 [ C31 H36 O18, tgt=50.38, overall=50.38 ]			(679.1722, 242019.22)(680.17487, 82431.07)(681.1749, 17006.05)(682.1737, 1346.5359)	15.6758
CPD-18158	622460	553997	1	550734	549794	528727	556174	468857	508421	499985	713873	694131	633947	605756	1	623228	557624	536605	854603	750293	788600	777568	632390	1	911720	802578	511684	505806	651124	653408	CPD-18158	CPD-18158 [ C27 H30 O15, tgt=58.45, overall=58.45 ]			(595.1588, 15986.243)(596.16144, 3348.71)(577.1616, 1517.3134)	5.442
CPD0-1221	724044	733672	943595	940558	830825	840728	1362798	1348252	1096783	1110157	1140155	1217366	1365839	1316344	1590420	1594520	2013298	2003926	1762062	1691417	1723989	1685913	1582976	1610860	1211849	1011470	904732	902852	1263123	1241513	CPD0-1221	CPD0-1221 [ C8 H10 N O5 P, tgt=36.98, overall=36.98 ]			(219.03967, 536.8775)(249.0584, 42484.973)(250.06123, 3983.733)(251.05331, 938.204)(231.04788, 25487.436)(232.05157, 1218.3282)	9.0722
CPD0-1224	151547	146597	113726	107062	130153	128188	166452	131991	101119	115202	119048	114647	166691	142277	110826	120055	113152	109482	135524	106229	109035	106931	99960	95578	184740	142489	117189	116036	114555	107631	CPD0-1224	CPD0-1224 [ C5 H8 Cl N O3, tgt=56.01, overall=56.01 ]			(167.01132, 2602.419)(183.04904, 8965.354)(184.04895, 935.87354)(170.04752, 4415.6187)(171.04889, 4952.2065)	1.4308
CPD-9441	604189	631810	567385	529019	565440	151387	533493	473119	514123	543570	1296369	172702	489703	495630	644192	615727	588099	591983	1032363	1008184	1024890	1025434	939683	1036136	483776	468546	216458	329929	533518	575158	CPD-9441	CPD-9441 [ C25 H28 O6, tgt=27.94, overall=27.94 ]			(408.17566, 195901.5)(409.1782, 65744.65)(410.68323, 10375.249)(411.6901, 1975.5891)(412.19122, 626.04)(408.39166, 227369.5)(410.74228, 14645.342)(411.6902, 3426.9983)(412.20142, 779.45996)(442.2196, 674.43)(449.15216, 984.0078)(452.2958, 2382.269)(452.9995, 2228.036)(453.2012, 2875.81)(434.1941, 1508.855)	4.7032
CPD-9411	1599694	1548276	2428692	2396259	1953895	1944129	2090042	2060672	3114120	3030517	2262910	2367710	3041637	2805200	2596052	2571227	2869631	2975056	2452942	2374854	2622698	2649314	1	2109538	2370260	2207796	1897875	1891152	2140658	2152033	CPD-9411	CPD-9411 [ C15 H24 O, tgt=69.83, overall=69.83 ]			(221.18784, 15101.732)(222.19096, 1013.4632)(203.17793, 86202.69)(204.18082, 11153.496)	10.6462
CPD-9413	1	1	1	1	1	1	1	1	1	1	1	1	1	1	1	1	1	1	1	1	1	1	1	1	247388	1	1	1	1	1	CPD-9413	CPD-9413 [ C15 H21 O2, tgt= ]			(215.137, 13553.03)(260.1575, 894.48)	2.0665
CPD-3764	312656	288703	111585	109547	266416	227372	250898	260749	1	1	224851	1	390743	379756	383318	369099	221516	230890	1	1	288425	285949	315346	292165	468224	479227	871398	874365	150053	152576	CPD-3764	CPD-3764 [ C25 H49 N6 O8, tgt=55.61, overall=55.61 ]			(549.36914, 619.68)(563.3869, 2269.415)(545.37585, 8543.57)(546.37823, 1034.482)(581.679, 5479.5664)(582.47986, 2456.0383)(583.4078, 9899.054)(584.4119, 2894.66)(563.3856, 1012.20624)(584.35065, 3274.5)(570.3535, 9755.795)(571.3562, 1584.0549)	17.1173
CPD-9412	1762854	1691091	1668991	1646785	1642169	1611585	1638464	1494498	1752271	1736768	1	1888278	1955528	1780591	1762008	1774999	1616963	1603532	2031035	1860033	1639414	1639218	1	1	2259751	2068609	1910707	1883778	1780323	1737471	CPD-9412	CPD-9412 [ C15 H22 O, tgt=44.43, overall=44.43 ]			(241.1527, 57044.758)(242.1555, 6147.98)(226.15268, 2346.8389)(228.16801, 1177.4366)	2.22
FOLATE	6796410	6514327	4395500	4813779	5535915	5443958	6349700	6125482	3652913	5094573	7334014	6949715	6290309	6500615	5811592	6460946	1028619	6318893	5194149	6142473	1	1858817	6837155	5243244	6882416	6815055	6063389	5938845	7376183	7340298	FOLATE	FOLATE [ C19 H19 N7 O6, tgt=55.97, overall=55.97 ]			(446.15958, 532.47186)(425.14017, 2658.551)(425.3079, 2278.063)(459.1696, 3091.09)(441.16843, 102900.75)(442.17096, 17477.293)(443.17242, 1792.3724)(465.1452, 87.15)	7.07
CPD-18169	712736	672335	1272400	1302117	1024647	990956	2466846	2283207	1	1	1	1	184360	807067	881406	901453	463713	455306	1	1	1	1	1604893	1573281	652217	601717	268654	217473	530390	520827	CPD-18169	CPD-18169 [ C33 H40 O20, tgt=39.98, overall=39.98 ]			(738.19214, 24221.523)(739.19666, 5893.715)(740.2, 862.1)(758.2125, 44063.31)(759.21295, 30464.725)(760.2112, 24035.715)(761.2104, 9548.077)(762.2105, 3932.28)	15.3606
CPD-16602	1231046	1156709	966537	968331	991241	218727	854996	763889	242060	242622	309876	311808	680345	206166	257336	254405	231869	234958	4837143	4403735	4896539	4782807	3678893	3698905	717677	656099	200093	197370	264875	691490	CPD-16602	CPD-16602 [ C34 H34 O18, tgt=66.02, overall=66.02 ]			(712.1639, 25439.836)(713.1628, 5566.8125)(714.1578, 717.4425)(736.17773, 103343.1)(737.18036, 34785.145)(754.186, 5530.4683)(755.1892, 487.27)(741.1698, 547.13776)	12.4272
CPDQT-8	1881516	1775169	1015623	1038205	1445338	1446910	2090213	1942997	1764508	1732692	1499740	1469236	1025401	961814	1310607	1268838	1385363	1374892	1673864	1563560	1470763	1476630	1517889	1524058	2227394	2009619	2323737	2291864	2013114	1978317	CPDQT-8	CPDQT-8 [ C6 H12 O6, tgt=75.37, overall=75.37 ]			(163.0586, 1073.2479)(180.08531, 77440.336)(181.08778, 4069.329)	7.8962
CPD-16603	219415	209976	1	1	124056	137697	197397	166618	1	1	1	1	189012	194832	1	1	1	1	120114	1	169393	178984	1	1	193711	203093	1	1	1	1	CPD-16603	CPD-16603 [ C40 H44 O23, tgt=6.47, overall=6.47 ]			(910.24634, 8181.1973)(911.24384, 1535.5255)	27.9595
CPDQT-4	2270644	2197389	2489583	2482148	2299798	2315769	2675792	2163249	2550897	274482	241977	238837	264521	227741	194569	2640753	2286066	2280429	226985	2553692	2508255	2465683	206940	2423973	2731938	2407466	2629768	2537361	2158163	2563059	CPDQT-4	CPDQT-4 [ C6 H11 O9 P, tgt=20.52, overall=20.52 ]			(259.01038, 733.16364)(241.00319, 188052.94)(242.00398, 52828.934)(259.02713, 13188.954)(260.0289, 743.62)(261.02554, 785.765)(241.00381, 201970.7)(242.00467, 56867.902)	1.4018
CPDQT-5	757077	491858	397898	410430	387634	498994	912860	571370	258527	299638	306450	211812	1028425	713202	266388	856879	446401	201075	1253013	256895	357707	375037	298488	254425	1341301	1047696	208563	450056	274466	257671	CPDQT-5	CPDQT-5 [ C7 H10 N2 O6, tgt=51.70, overall=51.70 ]			(220.05934, 697.26733)(201.04254, 30082.652)(202.0469, 1540.6106)(220.06085, 455.365)(244.7548, 1732.3945)(246.0563, 2481.3838)	1.3934
CPD-16600	275826	270335	118702	135625	1	1	219992	218933	346532	340430	295658	293985	647413	273471	729033	243715	229799	225761	212225	1	118329	114722	220930	221146	198591	201250	218134	1	286621	280150	CPD-16600	CPD-16600 [ C14 H19 N O7, tgt=58.23, overall=58.23 ]			(313.9247, 7172.6157)(315.12976, 515.6533)(299.12292, 5401.2197)(300.1261, 370.055)(316.95282, 16992.727)(318.09012, 2450.2961)(299.12445, 5573.4106)(300.12753, 483.9394)(331.1497, 8774.786)(313.13916, 735.84357)(322.1105, 210.05)	6.02356
CPD-9422	1	25553936	15230765	15056235	20500348	20433392	312476	422810	24046568	23872164	20354572	20888038	14215436	13997902	418672	394776	562985	612851	420103	21164520	20225020	20234936	20316814	20853112	29417984	1	32427690	31331984	27990300	381351	CPD-9422	CPD-9422 [ C8 H14 O2, tgt=83.98, overall=83.98 ]			(128.10596, 5889.0127)(142.12138, 11254.311)(165.09013, 744185.3)(166.09314, 67799.625)(167.09537, 6150.3525)	8.18725
CPD-18170	1760426	1698070	1	2210148	1577213	1490621	1114252	990784	1789170	1732925	1820411	1709309	1723649	1363604	1708867	1698849	981509	978362	1204719	1085168	917422	910221	1128582	1072601	1858351	1467602	1106251	1073764	714135	660592	CPD-18170	CPD-18170 [ C32 H38 O19, tgt=35.53, overall=35.53 ]			(708.2018, 289.82)(745.2597, 38737.785)(746.26196, 13754.006)(730.9677, 3598.5593)(731.9828, 681.4663)(731.2398, 4435.63)(732.2422, 606.01)(736.17706, 2690.9802)(737.1814, 377.80835)	9.9364
CPD-9429	482091	522498	136270	132163	106193	112595	132442	106016	134831	126332	147836	152194	120935	103470	141182	139720	143480	139860	124031	103117	360466	1	130600	126384	109355	84572	128225	126836	137981	131876	CPD-9429	CPD-9429 [ C13 H19 N5 O7 P, tgt=37.72, overall=37.72 ]			(389.1176, 18904.13)(390.121, 2308.64)(407.1396, 1912.28)(391.13086, 267.805)(411.0943, 10136.535)(412.09592, 2141.271)(413.09018, 1276.3158)(393.0896, 20579.48)(394.09302, 1821.875)	2.46703
CPD-18100	1	130488	237686	228972	177272	148911	422091	348451	267462	227759	1	270932	421216	332784	396077	432604	454691	421332	369274	184985	1	1	1	1	387814	326154	1	1	371645	363277	CPD-18100	CPD-18100 [ C35 H34 O17, tgt= ]			(736.1788, 13147.79)(737.18164, 3760.857)	9.18815
CPD-12634	703330	1	297922	297551	1	310724	386846	2309618	479756	823097	1558392	1758200	2379464	2148664	506261	2192367	479410	650749	6078966	1634243	1722549	1931057	9673687	2248002	1008197	2103738	1	2048753	349971	277954	CPD-12634	CPD-12634 [ C20 H22 N5 O6 S, tgt=58.74, overall=58.74 ]			(465.1313, 31681.367)(466.1339, 5266.826)(449.13577, 3230.0322)(461.15442, 2329.6733)(462.1619, 449.5)	8.99056
CPD-12635	3367261	3276317	790301	792722	582012	607143	3181291	3335331	4166492	4151943	698362	661138	2879265	2703120	616268	649718	2569407	2982666	2921576	2859155	2951909	2913131	2666873	2508808	3598364	3757517	4381583	4381073	570320	571204	CPD-12635	CPD-12635 [ C15 H16 N4 O3 S, tgt=53.40, overall=53.40 ]			(361.08752, 35141.14)(315.08325, 117124.76)(316.08588, 17545.18)(317.0881, 937.30084)(350.12653, 175223.31)(351.12, 27791.768)(352.1197, 1321.1188)(337.06366, 2137.7358)	10.4427
CPD-12644	619144	706541	13180599	13806004	6764948	6476411	2369132	2422163	7468638	842216	5637461	5583547	3194086	3154437	10278780	10222787	8944505	9102496	8404466	827914	237438	258880	1193685	1152149	2580826	2562414	5533821	5386946	7359165	7169033	CPD-12644	CPD-12644 [ C42 H80 N O9 P, tgt=36.64, overall=36.64 ]			(773.5742, 6168.845)(774.5772, 2570.955)(760.57996, 36358.0)(761.5821, 15360.785)(762.5858, 1908.4199)(799.62115, 3359.1584)(798.8838, 2531.7017)(778.66565, 93438.195)(779.6687, 40493.26)(780.68555, 8652.137)(781.53925, 1037.1567)	24.2379
CPD-12643	755748	3498690	888837	3533425	3235076	3305341	734972	720130	1089793	1094113	787164	764727	777868	842801	858800	806562	2696708	2775781	3662597	678957	3127519	3071896	3585652	3587823	748497	767787	3470568	3553500	3391019	3166516	CPD-12643	CPD-12643 [ C9 H12 O, tgt=64.24, overall=64.24 ]			(119.08466, 27588.582)(120.08779, 1072.455)(137.0948, 16180.14)	5.1854
CPD-15544	551632	544363	647250	647886	591530	590935	498390	504954	607547	600493	551638	568744	475858	505893	474824	497683	487328	505134	534376	561107	513638	524063	554464	531064	385421	400600	438299	430875	621287	599621	CPD-15544	CPD-15544 [ C11 H16 N5 O5, tgt=74.90, overall=74.90 ]			(299.1246, 30248.744)(300.1276, 4232.7603)(325.10916, 4656.3994)	5.5834
CPD-12649	111768	102909	124450	114676	102607	104871	173822	239632	146990	150624	1	166131	137893	267290	216655	215217	250839	267202	166260	235618	253596	229591	211644	203239	106293	325641	185584	202280	254890	238216	CPD-12649	CPD-12649 [ C41 H62 N7 O17 P3 S, tgt=45.79, overall=45.79 ]			(1050.3113, 5156.292)(1051.3143, 2746.9238)	9.187
CPD-17063	90790	81138	1	1	165110	154240	1	192813	151909	156356	147619	150125	478020	427857	237781	205974	163682	177993	1	100206	155429	151568	1	1	155126	89364	99992	99974	84429	84510	CPD-17063	CPD-17063 [ C49 H56 Fe N4 O5, tgt=43.75, overall=43.75 ]			(836.3422, 4390.9033)(837.34564, 882.8117)(837.3498, 7410.654)(838.35333, 2319.3435)(855.4183, 8198.597)(861.3986, 6846.4556)(834.4009, 639.07996)(859.34644, 6265.975)(860.3492, 1409.6151)	14.3368
CPD-12647	82532	75164	1	1	1	1	141403	121680	1	1	1	1	106160	1	1	1	1	1	1	1	1	154966	1	1	119005	109401	1	1	1	1	CPD-12647	CPD-12647 [ C41 H64 N7 O17 P3 S, tgt=11.56, overall=11.56 ]			(1074.2947, 5630.088)(1075.2944, 2696.9387)(1076.29, 951.05505)	26.2814
CPD-12648	82532	75164	1580153	1541580	1655792	1694000	141403	121680	1451010	1395646	1275764	1239352	106160	1768903	1377778	1396433	1201444	1224166	1635384	1617336	1741724	154966	1500803	1469071	119005	109401	1534939	1535660	1244158	1218888	CPD-12648	CPD-12648 [ C41 H64 N7 O17 P3 S, tgt=11.56, overall=11.56 ]			(1074.2947, 5630.088)(1075.2944, 2696.9387)(1076.29, 951.05505)(1056.286, 29948.324)(1057.285, 17395.436)(1058.283, 7633.0977)(1059.281, 2328.1538)(1060.2769, 168.67)	28.3949
CPD-12653	806799	812983	810336	821748	800845	789107	1311111	1291059	719626	1854417	455079	1466491	935667	890968	1520979	1474050	1819791	1790823	917692	895149	856087	375220	344081	933766	667064	639688	474798	473207	1141223	1144725	CPD-12653	CPD-12653 [ C18 H27 O2, tgt=41.50, overall=41.50 ]			(275.1978, 26099.346)(276.2009, 2955.1619)(277.213, 60.3)(257.18677, 532.7844)(277.21274, 40930.31)(278.21567, 5414.0903)(279.22342, 761.8033)(279.22888, 4313.083)	14.4317
CPD-12655	5385006	5247556	7344210	7319049	6234193	6195212	4214713	4309750	4123185	1560051	1675643	6150511	5343156	5647188	5990044	5880890	4798342	4788761	4187563	1454392	1409196	1419814	1407759	1404416	3783937	3882555	2894467	2742939	5270643	5178231	CPD-12655	CPD-12655 [ C15 H11 O6, tgt=78.86, overall=78.86 ]			(271.05692, 15749.995)(272.0599, 2037.6068)(287.05286, 175610.67)(288.0555, 22296.176)(289.058, 2551.7844)(289.06378, 2908.645)(295.04166, 43826.215)(296.0445, 4533.6226)	6.9778
3-HEXAPRENYL-45-DIHYDROXYBENZOATE	4754029	5319538	406446	3194687	5815872	5618456	4039647	3968324	6876850	2086560	6896654	6867060	3607079	1783105	7068095	6755469	1962773	1878431	4938237	4748624	1717496	1703520	6328333	6086373	2305080	2286224	2763454	6542037	1957887	1858771	3-HEXAPRENYL-45-DIHYDROXYBENZOATE	3-HEXAPRENYL-45-DIHYDROXYBENZOATE [ C37 H53 O4, tgt=47.36, overall=47.36 ]			(547.48254, 1281.1744)(549.40784, 2371.095)(549.40906, 8771.588)(550.4118, 1257.844)(579.4206, 1384.96)(565.3969, 12506.232)(566.4006, 3765.9575)(567.4087, 1612.705)(568.416, 134.5)	20.0696
5-N-PROPYLTHIOADENOSINE	14224541	14057522	14035420	13900184	13862890	13827682	14350809	14034221	15053976	14718091	16096136	16208418	14984033	14610893	15374026	15303897	15129056	14595710	13799524	13595683	14247271	13679666	12525930	12748230	15174379	14660087	13439237	13237645	15729041	15592422	5-N-PROPYLTHIOADENOSINE	5-N-PROPYLTHIOADENOSINE [ C13 H19 N5 O3 S, tgt=66.37, overall=66.37 ]			(325.13898, 522.05896)(330.1031, 380497.5)(331.10455, 47930.008)(332.1065, 3172.0156)	15.6646
CPD-18120	1135127	1018234	1370407	1305262	1177372	1135347	1461378	1121869	1198791	1189818	1485557	1460337	1598055	1199801	1296093	1303202	1435415	1398283	2440937	1904845	1953623	1916989	1656083	1631289	2117833	1576751	887379	875110	1525774	1511570	CPD-18120	CPD-18120 [ C9 H8 O3, tgt=70.92, overall=70.92 ]			(147.0422, 4264.26)(165.0532, 13651.312)(182.07968, 48842.06)(183.08261, 3400.2166)(165.97153, 5138.2393)	2.1298
CPD-12657	511238	488018	592348	597309	531869	520174	1032213	1086022	757746	755961	834634	833775	1057344	1102660	947311	940204	1295002	1307279	1204337	1245963	1152853	1124648	1251328	1218554	621722	633414	519684	511850	1053715	1040284	CPD-12657	CPD-12657 [ C21 H19 O11, tgt=44.93, overall=44.93 ]			(448.6918, 4370.059)(452.0968, 911.22675)(451.1002, 8992.669)(452.0975, 290.67)(465.13144, 46315.074)(466.13412, 7672.8296)(467.13535, 651.79645)	8.8664
CPD0-2267	836982	730384	751490	761271	717038	730170	1058333	752750	815315	750261	717858	737624	1223615	858717	805159	701999	737364	706827	1158680	768603	748666	745011	728354	729130	1170004	798883	735277	733540	773853	779177	CPD0-2267	CPD0-2267 [ C7 H12 N O4, tgt=62.92, overall=62.92 ]			(157.07007, 58969.977)(158.07158, 9530.674)(159.06859, 7749.3027)	1.39683
5-AMINO-LEVULINATE	2057011	1969907	1	2233829	2048550	2055943	2267785	2162217	2471613	2458993	2350279	2348411	2245405	2373584	2204528	2183631	2142540	2119543	2011612	2075220	1838039	1876322	2075627	2003754	2071886	2045153	2070141	2094650	2235622	2150233	5-AMINO-LEVULINATE	5-AMINO-LEVULINATE [ C5 H9 N O3, tgt=59.20, overall=59.20 ]			(133.06366, 146.38)(115.05328, 2070.251)(116.05336, 309.53403)(149.09496, 48189.75)(150.09802, 3066.5454)(151.11034, 169.53001)(131.08444, 14031.239)(132.0885, 150.21)	4.9994
#NAME?	480101	464073	401776	387528	417302	426617	347187	351094	556145	538202	487415	514161	473109	482523	490107	499729	534277	532384	345744	359894	416631	410279	277976	258545	442644	464450	312082	299626	417708	416319	#NAME?	--ABIETADIENE [ C20 H32, tgt=73.15, overall=73.15 ]			(273.255, 27437.871)(274.258, 4363.579)	12.4872
PHENYLHYDANTOIN	1203174	1138991	1136568	1041801	471223	1040362	1829204	1188042	961579	965969	1	973687	736400	1901336	988193	1064873	152743	1071843	1	1073161	1034850	1014102	1	933983	2021999	1034603	930911	1183754	1126642	1068464	PHENYLHYDANTOIN	PHENYLHYDANTOIN [ C9 H8 N2 O2, tgt=42.74, overall=42.74 ]			(199.04346, 3912.0466)(200.04506, 97.495)(201.04, 358.57)(161.05807, 330.89664)(164.0703, 335.92798)(177.06035, 4373.0435)(195.09961, 880.9423)(177.29355, 9942.161)(183.71266, 619.14276)(177.0874, 338.24332)	5.1003
CPD-12663	175478	1	269831	268756	219649	217685	170378	164896	276994	275751	157729	185283	126634	115053	213403	232665	170362	175208	2936923	2872011	2951012	2916790	2708025	2545628	2886898	2764527	255273	247554	3125706	143276	CPD-12663	CPD-12663 [ C13 H15 O9, tgt=47.20, overall=47.20 ]			(319.0736, 5745.915)(301.06677, 2238.629)(319.53622, 6960.9565)(317.08817, 789.23773)(303.08105, 33886.637)(335.10736, 4376.5103)(317.09637, 615.0506)(322.05176, 1968.9781)	5.0536
2-AMINO-3-3-OXOPROP-2-ENYL-BUT-2-ENEDI	883708	772131	397898	410430	443643	585230	1056869	658537	1	1	1	1	1177075	834668	554932	1	1	1	783942	376970	456639	581000	398448	358515	1189838	1100519	289125	573235	1	435105	2-AMINO-3-3-OXOPROP-2-ENYL-BUT-2-ENEDI	2-AMINO-3-3-OXOPROP-2-ENYL-BUT-2-ENEDI [ C7 H5 N O5, tgt=47.04, overall=47.04 ]			(185.0157, 1022.78)(167.01106, 1828.3837)(168.0101, 176.62)(188.03705, 5273.2183)(189.0414, 398.235)(167.0117, 1793.03)(202.0481, 345.25)(184.04822, 587.5267)(187.99086, 1099.7188)	1.40218
N-ACETYL-5-METHOXY-TRYPTAMINE	319860	317700	389973	393687	348974	356461	468226	455251	393744	399141	243217	395957	464328	454199	474834	490584	502866	514726	491577	471931	466705	442664	97414	428002	473638	444632	366741	377594	471086	450340	N-ACETYL-5-METHOXY-TRYPTAMINE	N-ACETYL-5-METHOXY-TRYPTAMINE [ C13 H16 N2 O2, tgt=64.35, overall=64.35 ]			(217.11995, 5594.515)(235.13036, 7603.4604)	9.2
CPD-18131	1	1	1	1	1	1	1	1	1	1	134130	147831	139531	104124	150363	137764	1	1	136387	83549	91572	94632	144595	147108	320068	254009	138475	121484	106426	119291	CPD-18131	CPD-18131 [ C9 H7 O5, tgt= ]			(199.04297, 1246.3113)(213.06229, 7841.4263)(214.0641, 274.63)(215.058, 294.22)(219.02457, 35442.633)(220.22739, 769.57404)(221.1377, 898.7255)(222.027, 857.22)	2.07835
CPD-18130	1239131	1094027	680840	653304	850659	817684	1218035	989726	623023	649636	533350	557069	1390865	1038100	586402	561020	514464	510399	1493888	1136171	1356453	1330343	788066	756584	1189921	852293	572654	544984	576902	591957	CPD-18130	CPD-18130 [ C9 H4 O6, tgt=64.25, overall=64.25 ]			(227.03767, 4760.928)(230.98868, 32442.521)(231.99147, 1109.4801)(232.98819, 1446.479)	2.0172
CPD-18135	1239131	1094027	680840	653304	850659	817684	1218035	989726	623023	649636	533350	557069	1390865	1038100	586402	561020	514464	510399	1493888	1136171	1356453	1330343	788066	756584	1189921	852293	572654	544984	576902	591957	CPD-18135	CPD-18135 [ C9 H4 O6, tgt=64.25, overall=64.25 ]			(227.03767, 4760.928)(230.98868, 32442.521)(231.99147, 1109.4801)(232.98819, 1446.479)	2.0172
CPD1F-84	315291	298874	436043	445474	366908	360691	353140	186702	315859	318812	306181	305957	170857	170600	449039	462538	293109	297310	462372	447160	475266	478905	1	383121	704723	698499	274531	273756	179170	191106	CPD1F-84	CPD1F-84 [ C20 H23 O6, tgt=8.94, overall=8.94 ]			(341.4988, 10804.592)(342.13705, 1022.3223)(345.1628, 437.41498)(377.17383, 13438.395)(378.17563, 542.58)(364.19217, 1580.5588)(365.131, 2383.9268)(366.14468, 402.94998)	11.1628
8-AMINO-7-OXONONANOATE	249986	244494	239788	248878	238264	239423	245882	242519	204109	215263	282878	292374	202048	211599	243834	254828	287053	267305	244319	244397	279880	274626	211469	202470	225311	222746	195281	200632	292516	300029	8-AMINO-7-OXONONANOATE	8-AMINO-7-OXONONANOATE [ C9 H17 N O3, tgt=87.01, overall=87.01 ]			(189.1254, 27104.812)(190.12825, 2551.4568)(171.11519, 677.46783)(189.126, 29001.55)(190.12888, 2726.582)(191.14075, 13269.151)(172.7945, 4858.103)(197.11548, 876.3883)	4.8794
CPD-10296	150285	225567	436668	427859	325290	288860	207069	215769	440209	312885	250861	295238	265610	280755	232548	314361	251494	241738	205664	181996	232050	220340	249368	245318	283081	163984	210668	198792	1	1	CPD-10296	CPD-10296 [ C33 H33 N4 O3, tgt=33.31, overall=33.31 ]			(533.25256, 9708.259)(534.25507, 1224.137)(522.27954, 1034.1663)(556.177, 23912.617)(556.2873, 10196.284)(557.2949, 1986.958)(556.2307, 11131.598)(557.23346, 2204.5525)(539.73474, 3015.6152)	6.93757
2-COUMARATE	15678526	14779182	24409680	24563804	21217928	20547214	14847482	13638327	18367648	18484676	21029736	20476540	16547328	15290293	20741060	20668082	14088265	14069624	18460128	16984952	17704540	17417644	15535784	15377769	14237571	12819460	8956367	8781991	18774692	18014370	2-COUMARATE	2-COUMARATE [ C9 H7 O3, tgt=93.85, overall=93.85 ]			(163.0383, 528321.0)(164.04105, 42571.117)(165.04315, 2618.2478)(145.02713, 3510.9187)(147.04204, 2638.684)	8.4534
CPD1F-90	916502	841872	1168988	1124485	982361	981593	990144	862925	1146336	1230547	1	879379	946025	833216	974545	982917	930009	936056	899536	798565	1	1	919085	879915	857156	730461	963285	920441	928122	901336	CPD1F-90	CPD1F-90 [ C15 H9 O6, tgt=14.19, overall=14.19 ]			(289.0636, 3049.1233)(303.08133, 19607.455)(304.08307, 639.4068)(305.07465, 1429.415)(289.06543, 3898.93)(291.9269, 2230.1655)(292.01874, 688.51)	2.09107
CPD1F-96	705448	554004	1	1	191750	1	1	1	1	1	313169	1	680235	735335	1	241001	1	1	1	700486	1	1	1	1	171667	303157	1	1	1	1	CPD1F-96	CPD1F-96 [ C20 H24 O6, tgt=4.05, overall=4.05 ]			(360.1619, 1664.3)(366.1725, 51697.516)(348.1603, 605.38)(364.19092, 1438.7433)(387.43634, 2299.9727)(384.1452, 241.8)(369.1467, 482.12)	6.29345
CPD1F-97	3249475	3125428	2047415	2030171	2563587	2543363	289883	1	1	1	1	1	1	3227787	4926875	4824957	1	1	508678	511693	1	1	1	503232	6857166	6635192	5297868	5295361	4434778	1	CPD1F-97	CPD1F-97 [ C20 H26 O5, tgt=39.01, overall=39.01 ]			(346.6256, 1871.1244)(328.1596, 102079.86)(329.1611, 15659.123)(330.16415, 473.56)(331.18347, 4282.9136)(332.18695, 1351.46)(365.22458, 3509.0725)(372.1767, 1066.0085)(351.1465, 3832.54)	14.8198
CPD1F-95	157601	152050	1	165146	169058	149566	1	430497	429994	426462	335248	325184	395830	377612	409461	410906	613009	618990	545991	539858	572596	566171	1	490424	425506	406545	312428	306195	311655	301462	CPD1F-95	CPD1F-95 [ C20 H26 O4, tgt=14.05, overall=14.05 ]			(355.1834, 2756.1172)(315.19006, 21679.05)(316.1933, 2777.31)(331.1844, 26146.125)(332.1875, 3761.295)	13.1266
CPD-12607	636382	1	670603	686166	748134	564584	663935	600290	618112	599312	660717	730443	698222	394087	458704	443546	676592	663599	712169	659068	642600	550526	577754	496625	1447616	1348409	1022811	622368	943833	622511	CPD-12607	CPD-12607 [ C5 H10 N2 O4, tgt=67.15, overall=67.15 ]			(185.05647, 6861.8735)(146.0592, 991.9)(163.07323, 13541.52)(164.07034, 1002.75543)(169.04787, 7584.5566)(165.08946, 3505.4111)	5.46364
[truncated: 2,323 more rows]

## Sheet: Table S2
Table S2. List of statistically significant metabolites (VIP compounds) responsible for differences among the treatments.
VIPs markers	M1.VIP[4+4+0]	M1.VIP[4]cvSE * 2,44693
16-hydroxytabersonine	1.60384	0.176855
codeinone/neopinone	1.54937	0.166546
[truncated: 189 more rows]
